# Supplementary material
Source: publisher figshare collection journal article supplement (https://acs.figshare.com/ndownloader/files/28376578)
Supplement: Supplementary file 1 [file 28376578]

## Sheet: hela_waters_3_psms
Confidence Level	Search ID	Processing Node No	Sequence	Unique Sequence ID	PSM Ambiguity	Protein Descriptions	# Proteins	# Protein Groups	Protein Group Accessions	Modifications	Activation Type	DeltaScore	DeltaCn	Rank	Search Engine Rank	q-Value	PEP	Decoy Peptides Matched	Peptides Matched	XCorr	# Missed Cleavages	Isolation Interference [%]	Ion Inject Time [ms]	Intensity	Charge	m/z [Da]	MH+ [Da]	Delta Mass [Da]	Delta Mass [PPM]	RT [min]	First Scan	Last Scan	MS Order	Ions Matched	Matched Ions	Total Ions	Spectrum File	Annotation
High	A	2	HAVSEGTK	26	Unambiguous	Histone H2B type 1-J OS=Homo sapiens OX=9606 GN=HIST1H2BJ PE=1 SV=3 - [H2B1J_HUMAN]|Histone H2B type 1-K OS=Homo sapiens OX=9606 GN=HIST1H2BK PE=1 SV=3 - [H2B1K_HUMAN]	15	2	P06899;O60814		HCD	1	0	1	1	0	4.83e-08	110	96	2.02	0	7	60	1845000	2	414.713	828.418	0	-3.8	2.28	536	536	MS2	0/0	0	0	hela_waters_3.raw
High	A	2	KPAAAAGAK	30	Unambiguous	Histone H1.4 OS=Homo sapiens OX=9606 GN=HIST1H1E PE=1 SV=2 - [H14_HUMAN]	1	1	P10412		HCD	1	0	1	1	0.004	0.0515	103	116	1.21	0	8	60	441600	2	392.736	784.464	0	-4.8	2.33	553	553	MS2	0/0	0	0	hela_waters_3.raw
High	A	2	KPAAAAGAK	30	Unambiguous	Histone H1.4 OS=Homo sapiens OX=9606 GN=HIST1H1E PE=1 SV=2 - [H14_HUMAN]	1	1	P10412		HCD	1	0	1	1	0.002	0.0145	103	116	1.1	0	62	60	340500	2	392.736	784.464	0	-4.57	2.43	588	588	MS2	0/0	0	0	hela_waters_3.raw
Middle	A	2	SPDDPSR	183	Unambiguous	Alpha-enolase OS=Homo sapiens OX=9606 GN=ENO1 PE=1 SV=2 - [ENOA_HUMAN]	1	1	P06733		HCD	1	0	1	1	0.019	0.263	23	28	1.35	0	30	60	481000	2	387.173	773.338	0	-5.77	2.72	734	734	MS2	0/0	0	0	hela_waters_3.raw
High	A	2	HAVSEGTK	26	Unambiguous	Histone H2B type 1-J OS=Homo sapiens OX=9606 GN=HIST1H2BJ PE=1 SV=3 - [H2B1J_HUMAN]|Histone H2B type 1-K OS=Homo sapiens OX=9606 GN=HIST1H2BK PE=1 SV=3 - [H2B1K_HUMAN]	15	2	P06899;O60814		HCD	1	0	1	1	0	4.96e-06	91	80	2.01	0	16	60	3478000	2	414.713	828.419	0	-1.96	2.79	772	772	MS2	0/0	0	0	hela_waters_3.raw
High	A	2	TVDGPSGK	272	Unambiguous	Glyceraldehyde-3-phosphate dehydrogenase OS=Homo sapiens OX=9606 GN=GAPDH PE=1 SV=3 - [G3P_HUMAN]	1	1	P04406		HCD	1	0	1	1	0	0.00516	171	169	1.12	0	61	60	391200	2	380.694	760.381	0	-3.38	2.9	823	823	MS2	0/0	0	0	hela_waters_3.raw
High	A	2	HAVSEGTK	26	Unambiguous	Histone H2B type 1-J OS=Homo sapiens OX=9606 GN=HIST1H2BJ PE=1 SV=3 - [H2B1J_HUMAN]|Histone H2B type 1-K OS=Homo sapiens OX=9606 GN=HIST1H2BK PE=1 SV=3 - [H2B1K_HUMAN]	15	2	P06899;O60814		HCD	1	0	1	1	0	1.03e-08	105	91	1.9	0	28	60	1454000	2	414.713	828.418	0	-3.14	3.3	966	966	MS2	0/0	0	0	hela_waters_3.raw
High	A	2	TVDGPSGK	272	Unambiguous	Glyceraldehyde-3-phosphate dehydrogenase OS=Homo sapiens OX=9606 GN=GAPDH PE=1 SV=3 - [G3P_HUMAN]	1	1	P04406		HCD	1	0	1	1	0	0.00462	147	149	1.16	0	51	60	107000	2	380.695	760.382	0	-1.7	3.5	1016	1016	MS2	0/0	0	0	hela_waters_3.raw
High	A	2	EAAEMGK	634	Unambiguous	Elongation factor 1-alpha 1 OS=Homo sapiens OX=9606 GN=EEF1A1 PE=1 SV=1 - [EF1A1_HUMAN]|Elongation factor 1-alpha 2 OS=Homo sapiens OX=9606 GN=EEF1A2 PE=1 SV=1 - [EF1A2_HUMAN]	3	2	P68104;Q05639		HCD	1	0	1	1	0.003	0.0323	96	81	1.15	0	46	60	163500	2	368.171	735.334	0	-0.26	5.35	1446	1446	MS2	0/0	0	0	hela_waters_3.raw
High	A	2	EAAEMGK	634	Unambiguous	Elongation factor 1-alpha 1 OS=Homo sapiens OX=9606 GN=EEF1A1 PE=1 SV=1 - [EF1A1_HUMAN]|Elongation factor 1-alpha 2 OS=Homo sapiens OX=9606 GN=EEF1A2 PE=1 SV=1 - [EF1A2_HUMAN]	3	2	P68104;Q05639		HCD	1	0	1	1	0	0.00186	69	56	1.42	0	37	60	224800	2	368.171	735.335	0	0.41	5.86	1573	1573	MS2	0/0	0	0	hela_waters_3.raw
High	A	2	KLEDGPK	700	Unambiguous	Elongation factor 1-alpha 1 OS=Homo sapiens OX=9606 GN=EEF1A1 PE=1 SV=1 - [EF1A1_HUMAN]	2	1	P68104		HCD	1	0	1	1	0.001	0.00703	99	105	1.34	1	56	60	488500	2	393.722	786.436	0	1.03	5.87	1577	1577	MS2	0/0	0	0	hela_waters_3.raw
Middle	A	2	EAAEMGK	634	Unambiguous	Elongation factor 1-alpha 1 OS=Homo sapiens OX=9606 GN=EEF1A1 PE=1 SV=1 - [EF1A1_HUMAN]|Elongation factor 1-alpha 2 OS=Homo sapiens OX=9606 GN=EEF1A2 PE=1 SV=1 - [EF1A2_HUMAN]	3	2	P68104;Q05639		HCD	1	0	1	1	0.046	0.644	96	81	0.8	0	36	60	215200	2	368.17	735.333	0	-1.34	6.36	1694	1694	MS2	0/0	0	0	hela_waters_3.raw
High	A	2	KLEDGPK	700	Unambiguous	Elongation factor 1-alpha 1 OS=Homo sapiens OX=9606 GN=EEF1A1 PE=1 SV=1 - [EF1A1_HUMAN]	2	1	P68104		HCD	1	0	1	1	0	0.00506	89	95	1.37	1	42	60	601200	2	393.721	786.436	0	-0.06	6.38	1699	1699	MS2	0/0	0	0	hela_waters_3.raw
Middle	A	2	EAAEMGK	634	Unambiguous	Elongation factor 1-alpha 1 OS=Homo sapiens OX=9606 GN=EEF1A1 PE=1 SV=1 - [EF1A1_HUMAN]|Elongation factor 1-alpha 2 OS=Homo sapiens OX=9606 GN=EEF1A2 PE=1 SV=1 - [EF1A2_HUMAN]	3	2	P68104;Q05639		HCD	1	0	1	1	0.013	0.195	96	81	0.71	0	54	60	85170	2	368.17	735.333	0	-1.09	6.88	1808	1808	MS2	0/0	0	0	hela_waters_3.raw
High	A	2	KLEDGPK	700	Unambiguous	Elongation factor 1-alpha 1 OS=Homo sapiens OX=9606 GN=EEF1A1 PE=1 SV=1 - [EF1A1_HUMAN]	2	1	P68104		HCD	1	0	1	1	0.001	0.0118	89	94	1.35	1	53	60	464800	2	393.721	786.434	0	-1.53	6.89	1811	1811	MS2	0/0	0	0	hela_waters_3.raw
High	A	2	GScFHR	763	Unambiguous	Peptidyl-prolyl cis-trans isomerase A OS=Homo sapiens OX=9606 GN=PPIA PE=1 SV=2 - [PPIA_HUMAN]	6	1	P62937	C3(Carbamidomethyl)	HCD	1	0	1	1	0.004	0.0452	20	24	0.71	0	18	60	165000	2	382.169	763.33	0	-0.9	7.07	1852	1852	MS2	0/0	0	0	hela_waters_3.raw
High	A	2	GScFHR	763	Unambiguous	Peptidyl-prolyl cis-trans isomerase A OS=Homo sapiens OX=9606 GN=PPIA PE=1 SV=2 - [PPIA_HUMAN]	6	1	P62937	C3(Carbamidomethyl)	HCD	1	0	1	1	0.002	0.0137	18	20	0.73	0	15	60	296900	2	382.169	763.331	0	0.62	7.58	1966	1966	MS2	0/0	0	0	hela_waters_3.raw
Middle	A	2	GScFHR	763	Unambiguous	Peptidyl-prolyl cis-trans isomerase A OS=Homo sapiens OX=9606 GN=PPIA PE=1 SV=2 - [PPIA_HUMAN]	6	1	P62937	C3(Carbamidomethyl)	HCD	1	0	1	1	0.032	0.409	20	24	0.5	0	36	60	99460	2	382.168	763.329	0	-1.3	8.09	2078	2078	MS2	0/0	0	0	hela_waters_3.raw
Middle	A	2	NDEELNK	809	Unambiguous	Histone H2AX OS=Homo sapiens OX=9606 GN=H2AFX PE=1 SV=2 - [H2AX_HUMAN]|Histone H2A type 1-H OS=Homo sapiens OX=9606 GN=HIST1H2AH PE=1 SV=3 - [H2A1H_HUMAN]	13	2	P16104;Q96KK5		HCD	1	0	1	1	0.03	0.394	60	67	0.96	0	34	60	1870000	2	431.201	861.394	0	-0.93	8.15	2092	2092	MS2	0/0	0	0	hela_waters_3.raw
High	A	2	NDEELNK	809	Unambiguous	Histone H2AX OS=Homo sapiens OX=9606 GN=H2AFX PE=1 SV=2 - [H2AX_HUMAN]|Histone H2A type 1-H OS=Homo sapiens OX=9606 GN=HIST1H2AH PE=1 SV=3 - [H2A1H_HUMAN]	13	2	P16104;Q96KK5		HCD	1	0	1	1	0.002	0.0243	62	71	1.34	0	31	60	2024000	2	431.201	861.395	0	0.35	8.67	2208	2208	MS2	0/0	0	0	hela_waters_3.raw
Middle	A	2	FDENAK	821	Unambiguous	Phosphoglycerate kinase 1 OS=Homo sapiens OX=9606 GN=PGK1 PE=1 SV=3 - [PGK1_HUMAN]	1	1	P00558		HCD	1	0	1	1	0.036	0.474	93	101	0.64	0	53	60	70780	2	362.168	723.328	0	-3.68	8.97	2271	2271	MS2	0/0	0	0	hela_waters_3.raw
Middle	A	2	AIDEVNR	871	Rejected	Testis-specific Y-encoded-like protein 6 OS=Homo sapiens OX=9606 GN=TSPYL6 PE=1 SV=1 - [TSYL6_HUMAN]	1	0			HCD	0	0	1	1	0.031	0.405	128	128	0.46	0	45	60	106500	2	408.714	816.421	0	-0.13	9.05	2289	2289	MS2	0/0	0	0	hela_waters_3.raw
Middle	A	2	AIQAEER	872	Rejected	Leucine-rich repeat-containing protein 45 OS=Homo sapiens OX=9606 GN=LRRC45 PE=1 SV=1 - [LRC45_HUMAN]	1	0			HCD		0	2	2	0.032	0.405	128	128	0.46	0	45	60	106500	2	408.714	816.421	0	-0.13	9.05	2289	2289	MS2	0/0	0	0	hela_waters_3.raw
Middle	A	2	LAQAEER	874	Rejected	Uncharacterized protein C19orf18 OS=Homo sapiens OX=9606 GN=C19orf18 PE=2 SV=1 - [CS018_HUMAN]	1	0			HCD		0	3	4	0.01	0.138	128	128	0.46	0	45	60	106500	2	408.714	816.421	0	-0.13	9.05	2289	2289	MS2	0/0	0	0	hela_waters_3.raw
Middle	A	2	LAEQAER	875	Selected	14-3-3 protein beta/alpha OS=Homo sapiens OX=9606 GN=YWHAB PE=1 SV=3 - [1433B_HUMAN]|14-3-3 protein theta OS=Homo sapiens OX=9606 GN=YWHAQ PE=1 SV=1 - [1433T_HUMAN]|14-3-3 protein gamma OS=Homo sapiens OX=9606 GN=YWHAG PE=1 SV=2 - [1433G_HUMAN]|14-3-3 protein epsilon OS=Homo sapiens OX=9606 GN=YWHAE PE=1 SV=1 - [1433E_HUMAN]|14-3-3 protein sigma OS=Homo sapiens OX=9606 GN=SFN PE=1 SV=1 - [1433S_H…	7	7	P31946;P27348;P61981;P62258;P31947;P63104;Q04917		HCD		0	4	5	0.01	0.138	128	128	0.46	0	45	60	106500	2	408.714	816.421	0	-0.13	9.05	2289	2289	MS2	0/0	0	0	hela_waters_3.raw
Middle	A	2	NDEELNK	809	Unambiguous	Histone H2AX OS=Homo sapiens OX=9606 GN=H2AFX PE=1 SV=2 - [H2AX_HUMAN]|Histone H2A type 1-H OS=Homo sapiens OX=9606 GN=HIST1H2AH PE=1 SV=3 - [H2A1H_HUMAN]	13	2	P16104;Q96KK5		HCD	1	0	1	1	0.029	0.384	62	70	0.9	0	39	60	1691000	2	431.201	861.395	0	0.13	9.17	2321	2321	MS2	0/0	0	0	hela_waters_3.raw
Middle	A	2	AEGSEIR	903	Unambiguous	Protein disulfide-isomerase OS=Homo sapiens OX=9606 GN=P4HB PE=1 SV=3 - [PDIA1_HUMAN]	1	1	P07237		HCD	1	0	1	3	0.015	0.212	206	200	0.68	0	73	60	34020	2	381.193	761.379	0	0.38	9.43	2375	2375	MS2	0/0	0	0	hela_waters_3.raw
High	A	2	LAEQAER	875	Unambiguous	14-3-3 protein beta/alpha OS=Homo sapiens OX=9606 GN=YWHAB PE=1 SV=3 - [1433B_HUMAN]|14-3-3 protein theta OS=Homo sapiens OX=9606 GN=YWHAQ PE=1 SV=1 - [1433T_HUMAN]|14-3-3 protein gamma OS=Homo sapiens OX=9606 GN=YWHAG PE=1 SV=2 - [1433G_HUMAN]|14-3-3 protein epsilon OS=Homo sapiens OX=9606 GN=YWHAE PE=1 SV=1 - [1433E_HUMAN]|14-3-3 protein sigma OS=Homo sapiens OX=9606 GN=SFN PE=1 SV=1 - [1433S_H…	7	7	P31946;P27348;P61981;P62258;P31947;P63104;Q04917		HCD	1	0	1	1	0.002	0.0134	128	128	0.88	0	31	60	194000	2	408.714	816.421	0	0.17	9.55	2402	2402	MS2	0/0	0	0	hela_waters_3.raw
High	A	2	LAEQAER	875	Unambiguous	14-3-3 protein beta/alpha OS=Homo sapiens OX=9606 GN=YWHAB PE=1 SV=3 - [1433B_HUMAN]|14-3-3 protein theta OS=Homo sapiens OX=9606 GN=YWHAQ PE=1 SV=1 - [1433T_HUMAN]|14-3-3 protein gamma OS=Homo sapiens OX=9606 GN=YWHAG PE=1 SV=2 - [1433G_HUMAN]|14-3-3 protein epsilon OS=Homo sapiens OX=9606 GN=YWHAE PE=1 SV=1 - [1433E_HUMAN]|14-3-3 protein sigma OS=Homo sapiens OX=9606 GN=SFN PE=1 SV=1 - [1433S_H…	7	7	P31946;P27348;P61981;P62258;P31947;P63104;Q04917		HCD	1	0	1	1	0.001	0.00918	128	128	0.85	0	19	60	372100	2	408.714	816.421	0	0.39	10.06	2523	2523	MS2	0/0	0	0	hela_waters_3.raw
High	A	2	LAEQAER	875	Unambiguous	14-3-3 protein beta/alpha OS=Homo sapiens OX=9606 GN=YWHAB PE=1 SV=3 - [1433B_HUMAN]|14-3-3 protein theta OS=Homo sapiens OX=9606 GN=YWHAQ PE=1 SV=1 - [1433T_HUMAN]|14-3-3 protein gamma OS=Homo sapiens OX=9606 GN=YWHAG PE=1 SV=2 - [1433G_HUMAN]|14-3-3 protein epsilon OS=Homo sapiens OX=9606 GN=YWHAE PE=1 SV=1 - [1433E_HUMAN]|14-3-3 protein sigma OS=Homo sapiens OX=9606 GN=SFN PE=1 SV=1 - [1433S_H…	7	7	P31946;P27348;P61981;P62258;P31947;P63104;Q04917		HCD	1	0	1	1	0.001	0.0109	128	124	0.92	0	18	60	508100	2	408.715	816.422	0	1.14	10.57	2644	2644	MS2	0/0	0	0	hela_waters_3.raw
High	A	2	TEELNR	984	Unambiguous	Keratin, type I cytoskeletal 17 OS=Homo sapiens OX=9606 GN=KRT17 PE=1 SV=2 - [K1C17_HUMAN]|Glutamate receptor ionotropic, delta-1 OS=Homo sapiens OX=9606 GN=GRID1 PE=2 SV=2 - [GRID1_HUMAN]|Keratin, type I cytoskeletal 19 OS=Homo sapiens OX=9606 GN=KRT19 PE=1 SV=4 - [K1C19_HUMAN]	4	3	Q04695;Q9ULK0;P08727		HCD	1	0	1	1	0	0.000687	178	170	1.6	0	45	60	176500	2	381.194	761.38	0	1.35	10.95	2733	2733	MS2	0/0	0	0	hela_waters_3.raw
High	A	2	LAEQAER	875	Unambiguous	14-3-3 protein beta/alpha OS=Homo sapiens OX=9606 GN=YWHAB PE=1 SV=3 - [1433B_HUMAN]|14-3-3 protein theta OS=Homo sapiens OX=9606 GN=YWHAQ PE=1 SV=1 - [1433T_HUMAN]|14-3-3 protein gamma OS=Homo sapiens OX=9606 GN=YWHAG PE=1 SV=2 - [1433G_HUMAN]|14-3-3 protein epsilon OS=Homo sapiens OX=9606 GN=YWHAE PE=1 SV=1 - [1433E_HUMAN]|14-3-3 protein sigma OS=Homo sapiens OX=9606 GN=SFN PE=1 SV=1 - [1433S_H…	7	7	P31946;P27348;P61981;P62258;P31947;P63104;Q04917		HCD	1	0	1	1	0.001	0.00623	128	128	1.02	0	35	60	340000	2	408.714	816.421	0	0.47	11.08	2765	2765	MS2	0/0	0	0	hela_waters_3.raw
High	A	2	SLETENR	1013	Unambiguous	Keratin, type I cytoskeletal 18 OS=Homo sapiens OX=9606 GN=KRT18 PE=1 SV=2 - [K1C18_HUMAN]	1	1	P05783		HCD	1	0	1	1	0.007	0.079	174	163	0.67	0	32	60	220800	2	424.709	848.411	0	0.44	11.23	2800	2800	MS2	0/0	0	0	hela_waters_3.raw
High	A	2	TEELNR	984	Unambiguous	Keratin, type I cytoskeletal 17 OS=Homo sapiens OX=9606 GN=KRT17 PE=1 SV=2 - [K1C17_HUMAN]|Glutamate receptor ionotropic, delta-1 OS=Homo sapiens OX=9606 GN=GRID1 PE=2 SV=2 - [GRID1_HUMAN]|Keratin, type I cytoskeletal 19 OS=Homo sapiens OX=9606 GN=KRT19 PE=1 SV=4 - [K1C19_HUMAN]	4	3	Q04695;Q9ULK0;P08727		HCD	1	0	1	1	0.002	0.0155	206	200	1.53	0	34	60	218900	2	381.193	761.38	0	1.11	11.45	2852	2852	MS2	0/0	0	0	hela_waters_3.raw
High	A	2	LAEQAER	875	Unambiguous	14-3-3 protein beta/alpha OS=Homo sapiens OX=9606 GN=YWHAB PE=1 SV=3 - [1433B_HUMAN]|14-3-3 protein theta OS=Homo sapiens OX=9606 GN=YWHAQ PE=1 SV=1 - [1433T_HUMAN]|14-3-3 protein gamma OS=Homo sapiens OX=9606 GN=YWHAG PE=1 SV=2 - [1433G_HUMAN]|14-3-3 protein epsilon OS=Homo sapiens OX=9606 GN=YWHAE PE=1 SV=1 - [1433E_HUMAN]|14-3-3 protein sigma OS=Homo sapiens OX=9606 GN=SFN PE=1 SV=1 - [1433S_H…	7	7	P31946;P27348;P61981;P62258;P31947;P63104;Q04917		HCD	1	0	1	1	0	0.00343	128	128	1.14	0	29	60	238400	2	408.714	816.422	0	0.69	11.58	2884	2884	MS2	0/0	0	0	hela_waters_3.raw
High	A	2	LAEQAER	875	Unambiguous	14-3-3 protein beta/alpha OS=Homo sapiens OX=9606 GN=YWHAB PE=1 SV=3 - [1433B_HUMAN]|14-3-3 protein theta OS=Homo sapiens OX=9606 GN=YWHAQ PE=1 SV=1 - [1433T_HUMAN]|14-3-3 protein gamma OS=Homo sapiens OX=9606 GN=YWHAG PE=1 SV=2 - [1433G_HUMAN]|14-3-3 protein epsilon OS=Homo sapiens OX=9606 GN=YWHAE PE=1 SV=1 - [1433E_HUMAN]|14-3-3 protein sigma OS=Homo sapiens OX=9606 GN=SFN PE=1 SV=1 - [1433S_H…	7	7	P31946;P27348;P61981;P62258;P31947;P63104;Q04917		HCD	1	0	1	1	0.003	0.0328	128	128	0.73	0	55	60	154900	2	408.714	816.422	0	0.54	12.09	3004	3004	MS2	0/0	0	0	hela_waters_3.raw
High	A	2	SSQPLASK	1052	Unambiguous	High mobility group protein HMG-I/HMG-Y OS=Homo sapiens OX=9606 GN=HMGA1 PE=1 SV=3 - [HMGA1_HUMAN]	1	1	P17096		HCD	1	0	1	1	0.004	0.0498	381	351	1.08	0	44	60	114600	2	409.227	817.446	0	5.32	12.13	3013	3013	MS2	0/0	0	0	hela_waters_3.raw
High	A	2	DLDQcR	1059	Unambiguous	Protein S100-A10 OS=Homo sapiens OX=9606 GN=S100A10 PE=1 SV=2 - [S10AA_HUMAN]	1	1	P60903	C5(Carbamidomethyl)	HCD	1	0	1	1	0.009	0.128	47	52	0.61	0	70	60	110400	2	403.677	806.347	0	0.7	12.21	3033	3033	MS2	0/0	0	0	hela_waters_3.raw
High	A	2	DIDTAAK	1097	Unambiguous	ATP synthase F(0) complex subunit C1, mitochondrial OS=Homo sapiens OX=9606 GN=ATP5MC1 PE=1 SV=2 - [AT5G1_HUMAN]	3	1	P05496		HCD	1	0	1	1	0.008	0.0871	232	237	0.72	0	47	60	89290	2	367.19	733.373	0	0.2	12.7	3150	3150	MS2	0/0	0	0	hela_waters_3.raw
Middle	A	2	ETIEQEK	1105	Unambiguous	Thymosin beta-4 OS=Homo sapiens OX=9606 GN=TMSB4X PE=1 SV=2 - [TYB4_HUMAN]	2	1	P62328		HCD	1	0	1	1	0.016	0.227	152	158	1.01	0	18	60	464700	2	438.72	876.432	0	1.62	12.94	3208	3208	MS2	0/0	0	0	hela_waters_3.raw
High	A	2	GTGASGSFK	1121	Unambiguous	Histone H1.5 OS=Homo sapiens OX=9606 GN=HIST1H1B PE=1 SV=3 - [H15_HUMAN]|Histone H1.4 OS=Homo sapiens OX=9606 GN=HIST1H1E PE=1 SV=2 - [H14_HUMAN]	6	2	P16401;P10412		HCD	1	0	1	1	0	0.000273	96	105	1.47	0	9	60	395700	2	406.201	811.396	0	1.45	13.29	3301	3301	MS2	0/0	0	0	hela_waters_3.raw
High	A	2	GTGASGSFK	1121	Unambiguous	Histone H1.5 OS=Homo sapiens OX=9606 GN=HIST1H1B PE=1 SV=3 - [H15_HUMAN]|Histone H1.4 OS=Homo sapiens OX=9606 GN=HIST1H1E PE=1 SV=2 - [H14_HUMAN]	6	2	P16401;P10412		HCD	1	0	1	1	0	5.17e-08	97	105	1.88	0	3	60	821800	2	406.201	811.395	0	1.15	13.8	3427	3427	MS2	0/0	0	0	hela_waters_3.raw
Middle	A	2	ETIEQEK	1105	Unambiguous	Thymosin beta-4 OS=Homo sapiens OX=9606 GN=TMSB4X PE=1 SV=2 - [TYB4_HUMAN]	2	1	P62328		HCD	1	0	1	1	0.023	0.319	152	158	0.53	0	36	60	214400	2	438.719	876.431	0	0.57	13.96	3466	3466	MS2	0/0	0	0	hela_waters_3.raw
High	A	2	GTGASGSFK	1121	Unambiguous	Histone H1.5 OS=Homo sapiens OX=9606 GN=HIST1H1B PE=1 SV=3 - [H15_HUMAN]|Histone H1.4 OS=Homo sapiens OX=9606 GN=HIST1H1E PE=1 SV=2 - [H14_HUMAN]	6	2	P16401;P10412		HCD	1	0	1	1	0	0.00101	96	105	1.37	0	17	60	354700	2	406.202	811.396	0	1.68	14.3	3556	3556	MS2	0/0	0	0	hela_waters_3.raw
High	A	2	GTGASGSFK	1121	Unambiguous	Histone H1.5 OS=Homo sapiens OX=9606 GN=HIST1H1B PE=1 SV=3 - [H15_HUMAN]|Histone H1.4 OS=Homo sapiens OX=9606 GN=HIST1H1E PE=1 SV=2 - [H14_HUMAN]	6	2	P16401;P10412		HCD	1	0	1	1	0.009	0.129	79	84	0.9	0	36	60	244200	2	406.202	811.396	0	2.2	14.81	3684	3684	MS2	0/0	0	0	hela_waters_3.raw
High	A	2	SYTSGPGSR	1198	Unambiguous	Keratin, type II cytoskeletal 8 OS=Homo sapiens OX=9606 GN=KRT8 PE=1 SV=7 - [K2C8_HUMAN]	1	1	P05787		HCD	1	0	1	1	0.001	0.0063	81	83	0.89	0	24	60	217300	2	456.215	911.423	0	0.85	14.89	3708	3708	MS2	0/0	0	0	hela_waters_3.raw
Middle	A	2	SSTPEEVK	1204	Unambiguous	Cofilin-1 OS=Homo sapiens OX=9606 GN=CFL1 PE=1 SV=3 - [COF1_HUMAN]	1	1	P23528		HCD	1	0	1	1	0.035	0.448	152	158	0.72	0	28	60	209800	2	438.72	876.432	0	1.48	14.97	3726	3726	MS2	0/0	0	0	hela_waters_3.raw
Middle	A	2	GTGASGSFK	1121	Unambiguous	Histone H1.5 OS=Homo sapiens OX=9606 GN=HIST1H1B PE=1 SV=3 - [H15_HUMAN]|Histone H1.4 OS=Homo sapiens OX=9606 GN=HIST1H1E PE=1 SV=2 - [H14_HUMAN]	6	2	P16401;P10412		HCD	1	0	1	1	0.013	0.192	96	105	0.69	0	39	60	168300	2	406.201	811.396	0	1.45	15.32	3807	3807	MS2	0/0	0	0	hela_waters_3.raw
High	A	2	SYTSGPGSR	1198	Unambiguous	Keratin, type II cytoskeletal 8 OS=Homo sapiens OX=9606 GN=KRT8 PE=1 SV=7 - [K2C8_HUMAN]	1	1	P05787		HCD	1	0	1	1	0.008	0.107	73	74	0.4	0	32	60	133300	2	456.215	911.423	0	1.52	15.4	3832	3832	MS2	0/0	0	0	hela_waters_3.raw
High	A	2	GHVQPIR	1218	Unambiguous	40S ribosomal protein S26 OS=Homo sapiens OX=9606 GN=RPS26 PE=1 SV=3 - [RS26_HUMAN]	2	1	P62854		HCD	1	0	1	1	0.005	0.0616	108	116	1.07	0	45	60	153400	2	403.736	806.465	0	2.35	15.4	3833	3833	MS2	0/0	0	0	hela_waters_3.raw
High	A	2	GTGASGSFK	1121	Unambiguous	Histone H1.5 OS=Homo sapiens OX=9606 GN=HIST1H1B PE=1 SV=3 - [H15_HUMAN]|Histone H1.4 OS=Homo sapiens OX=9606 GN=HIST1H1E PE=1 SV=2 - [H14_HUMAN]	6	2	P16401;P10412		HCD	1	0	1	1	0.006	0.0722	96	105	0.9	0	28	60	215700	2	406.202	811.396	0	1.6	15.82	3938	3938	MS2	0/0	0	0	hela_waters_3.raw
High	A	2	EDAANNYAR	1242	Unambiguous	Tubulin alpha-1A chain OS=Homo sapiens OX=9606 GN=TUBA1A PE=1 SV=1 - [TBA1A_HUMAN]|Tubulin alpha-1B chain OS=Homo sapiens OX=9606 GN=TUBA1B PE=1 SV=1 - [TBA1B_HUMAN]|Tubulin alpha-1C chain OS=Homo sapiens OX=9606 GN=TUBA1C PE=1 SV=1 - [TBA1C_HUMAN]|Tubulin alpha-4A chain OS=Homo sapiens OX=9606 GN=TUBA4A PE=1 SV=1 - [TBA4A_HUMAN]|Tubulin alpha-8 chain OS=Homo sapiens OX=9606 GN=TUBA8 PE=1 SV=1 - …	7	3	Q9BQE3;P68366;A6NHL2		HCD	1	0	1	1	0	1.63e-06	58	70	1.53	0	0	60	520000	2	512.229	1023.45	0	2.36	16.09	4017	4017	MS2	0/0	0	0	hela_waters_3.raw
High	A	2	GTGASGSFK	1121	Unambiguous	Histone H1.5 OS=Homo sapiens OX=9606 GN=HIST1H1B PE=1 SV=3 - [H15_HUMAN]|Histone H1.4 OS=Homo sapiens OX=9606 GN=HIST1H1E PE=1 SV=2 - [H14_HUMAN]	6	2	P16401;P10412		HCD	1	0	1	1	0.001	0.0096	79	84	1.19	0	22	60	226700	2	406.202	811.396	0	2.13	16.33	4078	4078	MS2	0/0	0	0	hela_waters_3.raw
High	A	2	EDAANNYAR	1242	Unambiguous	Tubulin alpha-1A chain OS=Homo sapiens OX=9606 GN=TUBA1A PE=1 SV=1 - [TBA1A_HUMAN]|Tubulin alpha-1B chain OS=Homo sapiens OX=9606 GN=TUBA1B PE=1 SV=1 - [TBA1B_HUMAN]|Tubulin alpha-1C chain OS=Homo sapiens OX=9606 GN=TUBA1C PE=1 SV=1 - [TBA1C_HUMAN]|Tubulin alpha-4A chain OS=Homo sapiens OX=9606 GN=TUBA4A PE=1 SV=1 - [TBA4A_HUMAN]|Tubulin alpha-8 chain OS=Homo sapiens OX=9606 GN=TUBA8 PE=1 SV=1 - …	7	3	Q9BQE3;P68366;A6NHL2		HCD	1	0	1	1	0	0.00473	74	86	1.22	0	0	60	469300	2	512.229	1023.45	0	1.52	16.6	4152	4152	MS2	0/0	0	0	hela_waters_3.raw
High	A	2	GTGASGSFK	1121	Unambiguous	Histone H1.5 OS=Homo sapiens OX=9606 GN=HIST1H1B PE=1 SV=3 - [H15_HUMAN]|Histone H1.4 OS=Homo sapiens OX=9606 GN=HIST1H1E PE=1 SV=2 - [H14_HUMAN]	6	2	P16401;P10412		HCD	1	0	1	1	0.002	0.0182	96	102	0.99	0	16	60	255700	2	406.201	811.395	0	0.85	16.84	4214	4214	MS2	0/0	0	0	hela_waters_3.raw
High	A	2	GTGASGSFK	1121	Unambiguous	Histone H1.5 OS=Homo sapiens OX=9606 GN=HIST1H1B PE=1 SV=3 - [H15_HUMAN]|Histone H1.4 OS=Homo sapiens OX=9606 GN=HIST1H1E PE=1 SV=2 - [H14_HUMAN]	6	2	P16401;P10412		HCD	1	0	1	1	0.001	0.00585	96	105	1.39	0	26	60	187100	2	406.201	811.396	0	1.37	17.34	4343	4343	MS2	0/0	0	0	hela_waters_3.raw
High	A	2	GTGASGSFK	1121	Unambiguous	Histone H1.5 OS=Homo sapiens OX=9606 GN=HIST1H1B PE=1 SV=3 - [H15_HUMAN]|Histone H1.4 OS=Homo sapiens OX=9606 GN=HIST1H1E PE=1 SV=2 - [H14_HUMAN]	6	2	P16401;P10412		HCD	1	0	1	1	0.002	0.0187	79	84	0.84	0	18	60	176900	2	406.202	811.396	0	2.43	18.36	4621	4621	MS2	0/0	0	0	hela_waters_3.raw
High	A	2	GTNESLER	1336	Unambiguous	Vimentin OS=Homo sapiens OX=9606 GN=VIM PE=1 SV=4 - [VIME_HUMAN]	2	1	P08670		HCD	1	0	1	1	0	0.00433	120	135	1.18	0	28	60	166900	2	453.219	905.432	0	-0.92	18.42	4638	4638	MS2	0/0	0	0	hela_waters_3.raw
High	A	2	GTGASGSFK	1121	Unambiguous	Histone H1.5 OS=Homo sapiens OX=9606 GN=HIST1H1B PE=1 SV=3 - [H15_HUMAN]|Histone H1.4 OS=Homo sapiens OX=9606 GN=HIST1H1E PE=1 SV=2 - [H14_HUMAN]	6	2	P16401;P10412		HCD	1	0	1	1	0.002	0.0142	97	105	0.97	0	29	60	152500	2	406.201	811.395	0	1.22	18.86	4758	4758	MS2	0/0	0	0	hela_waters_3.raw
Middle	A	2	LFmFR	1348	Unambiguous	Putative short-chain dehydrogenase/reductase family 42E member 2 OS=Homo sapiens OX=9606 GN=SDR42E2 PE=3 SV=3 - [D42E2_HUMAN]	1	1	A6NKP2	M3(Oxidation)	HCD	1	0	1	1	0.041	0.566	66	73	0.52	0	55	60	76580	2	365.193	729.378	0	3.61	19.87	5030	5030	MS2	0/0	0	0	hela_waters_3.raw
Middle	A	2	LFmFR	1348	Rejected	Putative short-chain dehydrogenase/reductase family 42E member 2 OS=Homo sapiens OX=9606 GN=SDR42E2 PE=3 SV=3 - [D42E2_HUMAN]	1	1	A6NKP2	M3(Oxidation)	HCD	0.0196	0	1	1	0.045	0.632	47	54	0.51	0	43	60	39180	2	365.193	729.379	0	4.78	20.38	5175	5175	MS2	0/0	0	0	hela_waters_3.raw
Middle	A	2	MYIFR	1402	Rejected	Dynein heavy chain 11, axonemal OS=Homo sapiens OX=9606 GN=DNAH11 PE=1 SV=4 - [DYH11_HUMAN]	1	1	Q96DT5		HCD		0.0196	2	3	0.047	0.647	47	54	0.5	0	43	60	39180	2	365.193	729.379	0	4.8	20.38	5175	5175	MS2	0/0	0	0	hela_waters_3.raw
Middle	A	2	FmLFR	1365	Selected	Spectrin alpha chain, non-erythrocytic 1 OS=Homo sapiens OX=9606 GN=SPTAN1 PE=1 SV=3 - [SPTN1_HUMAN]	1	1	Q13813	M2(Oxidation)	HCD		0.0196	3	4	0.047	0.646	47	54	0.5	0	43	60	39180	2	365.193	729.379	0	4.78	20.38	5175	5175	MS2	0/0	0	0	hela_waters_3.raw
Middle	A	2	NGHVFR	1347	Rejected	Rho guanine nucleotide exchange factor 28 OS=Homo sapiens OX=9606 GN=ARHGEF28 PE=1 SV=3 - [ARG28_HUMAN]	1	0			HCD		0.0392	4	5	0.03	0.392	47	54	0.49	0	43	60	39180	2	365.193	729.379	0	-0.47	20.38	5175	5175	MS2	0/0	0	0	hela_waters_3.raw
Middle	A	2	GTGASGSFK	1121	Unambiguous	Histone H1.5 OS=Homo sapiens OX=9606 GN=HIST1H1B PE=1 SV=3 - [H15_HUMAN]|Histone H1.4 OS=Homo sapiens OX=9606 GN=HIST1H1E PE=1 SV=2 - [H14_HUMAN]	6	2	P16401;P10412		HCD	1	0	1	1	0.032	0.411	97	105	0.53	0	17	60	127200	2	406.201	811.395	0	0.92	20.49	5204	5204	MS2	0/0	0	0	hela_waters_3.raw
High	A	2	SAcGVcPGR	1437	Unambiguous	60S ribosomal protein L34 OS=Homo sapiens OX=9606 GN=RPL34 PE=1 SV=3 - [RL34_HUMAN]	1	1	P49207	C3(Carbamidomethyl); C6(Carbamidomethyl)	HCD	1	0	1	1	0.004	0.0509	22	39	0.98	0	4	60	170100	2	482.211	963.414	0	0.58	21.31	5435	5435	MS2	0/0	0	0	hela_waters_3.raw
High	A	2	GTGASGSFK	1121	Unambiguous	Histone H1.5 OS=Homo sapiens OX=9606 GN=HIST1H1B PE=1 SV=3 - [H15_HUMAN]|Histone H1.4 OS=Homo sapiens OX=9606 GN=HIST1H1E PE=1 SV=2 - [H14_HUMAN]	6	2	P16401;P10412		HCD	1	0	1	1	0.008	0.106	97	105	0.94	0	34	60	116100	2	406.201	811.395	0	1.22	21.5	5488	5488	MS2	0/0	0	0	hela_waters_3.raw
High	A	2	EPEQLR	1493	Unambiguous	Heterogeneous nuclear ribonucleoprotein A1 OS=Homo sapiens OX=9606 GN=HNRNPA1 PE=1 SV=5 - [ROA1_HUMAN]|Heterogeneous nuclear ribonucleoprotein A3 OS=Homo sapiens OX=9606 GN=HNRNPA3 PE=1 SV=2 - [ROA3_HUMAN]	3	2	P09651;P51991		HCD	1	0	1	1	0.004	0.0488	103	95	0.79	0	16	60	113400	2	386.204	771.4	0	0.87	22.08	5648	5648	MS2	0/0	0	0	hela_waters_3.raw
Middle	A	2	NAESNAELK	1519	Unambiguous	60S ribosomal protein L17 OS=Homo sapiens OX=9606 GN=RPL17 PE=1 SV=3 - [RL17_HUMAN]	1	1	P18621		HCD	1	0	1	1	0.039	0.537	154	174	0.55	0	3	60	242800	2	488.242	975.476	0	2.08	22.31	5715	5715	MS2	0/0	0	0	hela_waters_3.raw
High	A	2	EPEQLR	1493	Unambiguous	Heterogeneous nuclear ribonucleoprotein A1 OS=Homo sapiens OX=9606 GN=HNRNPA1 PE=1 SV=5 - [ROA1_HUMAN]|Heterogeneous nuclear ribonucleoprotein A3 OS=Homo sapiens OX=9606 GN=HNRNPA3 PE=1 SV=2 - [ROA3_HUMAN]	3	2	P09651;P51991		HCD	1	0	1	1	0.002	0.0203	103	95	0.78	0	24	60	149100	2	386.204	771.4	0	0.56	22.59	5806	5806	MS2	0/0	0	0	hela_waters_3.raw
Middle	A	2	GHYTIGK	1566	Unambiguous	Tubulin alpha-1A chain OS=Homo sapiens OX=9606 GN=TUBA1A PE=1 SV=1 - [TBA1A_HUMAN]|Tubulin alpha-1B chain OS=Homo sapiens OX=9606 GN=TUBA1B PE=1 SV=1 - [TBA1B_HUMAN]|Tubulin alpha-1C chain OS=Homo sapiens OX=9606 GN=TUBA1C PE=1 SV=1 - [TBA1C_HUMAN]|Tubulin alpha-4A chain OS=Homo sapiens OX=9606 GN=TUBA4A PE=1 SV=1 - [TBA4A_HUMAN]	6	2	Q9BQE3;P68366		HCD	1	0	1	1	0.039	0.522	246	219	1.24	0	38	60	309000	2	388.21	775.414	0	4.94	22.89	5914	5914	MS2	0/0	0	0	hela_waters_3.raw
High	A	2	TLPGGIMVNGSR	1569	Unambiguous	Guanylate-binding protein 5 OS=Homo sapiens OX=9606 GN=GBP5 PE=1 SV=1 - [GBP5_HUMAN]	1	1	Q96PP8		HCD	1	0	1	2	0.005	0.0618	179	164	0.88	0	40	60	139300	3	401.219	1201.64	0	4.64	22.89	5915	5915	MS2	0/0	0	0	hela_waters_3.raw
High	A	2	SGMNVAR	1571	Unambiguous	Pyruvate kinase PKM OS=Homo sapiens OX=9606 GN=PKM PE=1 SV=4 - [KPYM_HUMAN]	1	1	P14618		HCD	1	0	1	1	0	1.37e-05	183	198	1.19	0	53	60	115300	2	367.685	734.363	0	2.17	22.9	5916	5916	MS2	0/0	0	0	hela_waters_3.raw
High	A	2	GTGASGSFK	1121	Unambiguous	Histone H1.5 OS=Homo sapiens OX=9606 GN=HIST1H1B PE=1 SV=3 - [H15_HUMAN]|Histone H1.4 OS=Homo sapiens OX=9606 GN=HIST1H1E PE=1 SV=2 - [H14_HUMAN]	6	2	P16401;P10412		HCD	1	0	1	1	0.003	0.0424	79	84	1.16	0	55	60	148300	2	406.202	811.396	0	2.13	23.04	5969	5969	MS2	0/0	0	0	hela_waters_3.raw
High	A	2	AEAVESAQAGDK	1625	Unambiguous	DNA replication licensing factor MCM6 OS=Homo sapiens OX=9606 GN=MCM6 PE=1 SV=1 - [MCM6_HUMAN]	1	1	Q14566		HCD	1	0	1	1	0.002	0.0235	102	91	0.73	0	3	60	246300	2	588.282	1175.56	0	1.92	23.16	6010	6010	MS2	0/0	0	0	hela_waters_3.raw
High	A	2	TDTGEPMGR	1643	Unambiguous	Heat shock protein HSP 90-alpha OS=Homo sapiens OX=9606 GN=HSP90AA1 PE=1 SV=5 - [HS90A_HUMAN]	1	1	P07900		HCD	1	0	1	1	0.001	0.0066	29	36	1.09	0	23	60	537400	2	482.214	963.421	0	0.77	23.23	6046	6046	MS2	0/0	0	0	hela_waters_3.raw
High	A	2	SGMNVAR	1571	Unambiguous	Pyruvate kinase PKM OS=Homo sapiens OX=9606 GN=PKM PE=1 SV=4 - [KPYM_HUMAN]	1	1	P14618		HCD	1	0	1	1	0.002	0.0136	183	198	0.54	0	51	60	108500	2	367.685	734.362	0	1	23.41	6123	6123	MS2	0/0	0	0	hela_waters_3.raw
High	A	2	cScHGHSEAcEPETGAcQGcQHHTEGPR	1730	Unambiguous	Basement membrane-specific heparan sulfate proteoglycan core protein OS=Homo sapiens OX=9606 GN=HSPG2 PE=1 SV=4 - [PGBM_HUMAN]	1	1	P98160	C1(Carbamidomethyl); C3(Carbamidomethyl); C10(Carbamidomethyl); C17(Carbamidomethyl); C20(Carbamidomethyl)	HCD	1	0	1	1	0	1.12e-11	2	2	0.34	0	5	60	100500	5	648.05	3236.22	0	0.85	23.55	6190	6190	MS2	0/0	0	0	hela_waters_3.raw
Middle	A	2	RTDEAAFQK	1754	Unambiguous	Protein S100-A4 OS=Homo sapiens OX=9606 GN=S100A4 PE=1 SV=1 - [S10A4_HUMAN]	1	1	P26447		HCD	1	0	1	1	0.04	0.546	190	203	2.09	1	14	60	681800	2	533.27	1065.53	0	1.14	23.62	6226	6226	MS2	0/0	0	0	hela_waters_3.raw
High	A	2	LEGQAQAEAK	1618	Unambiguous	Pescadillo homolog OS=Homo sapiens OX=9606 GN=PES1 PE=1 SV=1 - [PESC_HUMAN]	1	1	O00541		HCD	1	0	1	1	0	2.22e-09	120	123	1.93	0	22	60	1007000	2	522.77	1044.53	0	0.54	23.64	6233	6233	MS2	0/0	0	0	hela_waters_3.raw
High	A	2	AEAVESAQAGDK	1625	Unambiguous	DNA replication licensing factor MCM6 OS=Homo sapiens OX=9606 GN=MCM6 PE=1 SV=1 - [MCM6_HUMAN]	1	1	Q14566		HCD	1	0	1	1	0	0.000418	109	97	1.07	0	9	60	609200	2	588.281	1175.56	0	1.3	23.67	6249	6249	MS2	0/0	0	0	hela_waters_3.raw
High	A	2	cDSSPDSAEDVRK	1805	Unambiguous	Alpha-2-HS-glycoprotein OS=Homo sapiens OX=9606 GN=AHSG PE=1 SV=2 - [FETUA_HUMAN]	1	1	P02765	C1(Carbamidomethyl)	HCD	1	0	1	1	0	3.44e-05	31	25	1.41	1	34	60	884900	3	489.213	1465.63	0	2.34	23.69	6261	6261	MS2	0/0	0	0	hela_waters_3.raw
Middle	A	2	ScEVPTR	1811	Unambiguous	Complement decay-accelerating factor OS=Homo sapiens OX=9606 GN=CD55 PE=1 SV=4 - [DAF_HUMAN]	1	1	P08174	C2(Carbamidomethyl)	HCD	1	0	1	1	0.016	0.23	119	129	0.94	0	42	60	219800	2	424.7	848.393	0	-0.65	23.7	6265	6265	MS2	0/0	0	0	hela_waters_3.raw
High	A	2	QASEGPLK	1833	Unambiguous	Glyceraldehyde-3-phosphate dehydrogenase OS=Homo sapiens OX=9606 GN=GAPDH PE=1 SV=3 - [G3P_HUMAN]	1	1	P04406		HCD	1	0	1	1	0	4.27e-05	96	111	1.8	0	16	60	1410000	2	415.225	829.442	0	0.89	23.73	6279	6279	MS2	0/0	0	0	hela_waters_3.raw
High	A	2	HYNGEAYEDDEHHPR	1835	Unambiguous	DnaJ homolog subfamily A member 1 OS=Homo sapiens OX=9606 GN=DNAJA1 PE=1 SV=2 - [DNJA1_HUMAN]	1	1	P31689		HCD	1	0	1	1	0	2.69e-15	8	7	2.07	0	26	60	276400	4	467.945	1868.76	0	0.26	23.73	6280	6280	MS2	0/0	0	0	hela_waters_3.raw
High	A	2	HYNGEAYEDDEHHPR	1835	Unambiguous	DnaJ homolog subfamily A member 1 OS=Homo sapiens OX=9606 GN=DNAJA1 PE=1 SV=2 - [DNJA1_HUMAN]	1	1	P31689		HCD	1	0	1	1	0	3.92e-14	8	7	2.17	0	38	60	712200	3	623.591	1868.76	0	0.17	23.75	6292	6292	MS2	0/0	0	0	hela_waters_3.raw
High	A	2	ENQGDETQGQQPPQR	1651	Unambiguous	Nuclease-sensitive element-binding protein 1 OS=Homo sapiens OX=9606 GN=YBX1 PE=1 SV=3 - [YBOX1_HUMAN]	1	1	P67809		HCD	1	0	1	1	0.009	0.135	94	73	0.48	0	0	60	206600	2	856.386	1711.77	0	1.15	23.81	6325	6325	MS2	0/0	0	0	hela_waters_3.raw
High	A	2	SDGAPASDSKPGSSEAAPSSK	1876	Unambiguous	Brain acid soluble protein 1 OS=Homo sapiens OX=9606 GN=BASP1 PE=1 SV=2 - [BASP1_HUMAN]	1	1	P80723		HCD	1	0	1	1	0.002	0.025	105	113	1.26	0	14	60	625500	3	644.964	1932.88	0	-0.13	23.83	6331	6331	MS2	0/0	0	0	hela_waters_3.raw
High	A	2	AAEDDEDDDVDTK	1878	Unambiguous	Prothymosin alpha OS=Homo sapiens OX=9606 GN=PTMA PE=1 SV=2 - [PTMA_HUMAN]	1	1	P06454		HCD	1	0	1	1	0	5.89e-13	6	8	1.86	0	0	60	1609000	2	719.278	1437.55	0	-0.9	23.86	6349	6349	MS2	0/0	0	0	hela_waters_3.raw
High	A	2	THVTHHPVSDHEATLR	1882	Unambiguous	HLA class I histocompatibility antigen, Cw-8 alpha chain OS=Homo sapiens OX=9606 GN=HLA-C PE=1 SV=1 - [1C08_HUMAN]|HLA class I histocompatibility antigen, B-51 alpha chain OS=Homo sapiens OX=9606 GN=HLA-B PE=1 SV=1 - [1B51_HUMAN]	18	1	P30505		HCD	1	0	1	1	0	4.21e-16	224	213	3.96	0	3	60	3824000	4	459.983	1836.91	0	-0.25	23.86	6352	6352	MS2	0/0	0	0	hela_waters_3.raw
High	A	2	VHSQGPHHVcELcNK	1904	Unambiguous	Myc-associated zinc finger protein OS=Homo sapiens OX=9606 GN=MAZ PE=1 SV=1 - [MAZ_HUMAN]	1	1	P56270	C10(Carbamidomethyl); C13(Carbamidomethyl)	HCD	1	0	1	1	0	9.71e-05	100	92	0.82	0	20	60	511300	4	451.211	1801.82	0	0.15	23.9	6374	6374	MS2	0/0	0	0	hela_waters_3.raw
High	A	2	VHFEESSK	1906	Unambiguous	X-ray repair cross-complementing protein 6 OS=Homo sapiens OX=9606 GN=XRCC6 PE=1 SV=2 - [XRCC6_HUMAN]	1	1	P12956		HCD	1	0	1	1	0.004	0.0537	116	106	0.82	0	71	60	381900	2	481.733	962.458	0	-0.07	23.9	6376	6376	MS2	0/0	0	0	hela_waters_3.raw
High	A	2	THVTHHPVSDHEATLR	1882	Unambiguous	HLA class I histocompatibility antigen, Cw-8 alpha chain OS=Homo sapiens OX=9606 GN=HLA-C PE=1 SV=1 - [1C08_HUMAN]|HLA class I histocompatibility antigen, B-51 alpha chain OS=Homo sapiens OX=9606 GN=HLA-B PE=1 SV=1 - [1B51_HUMAN]	18	1	P30505		HCD	1	0	1	1	0	4.21e-16	219	198	2.1	0	14	60	634400	5	368.187	1836.91	0	-1.3	23.93	6391	6391	MS2	0/0	0	0	hela_waters_3.raw
High	A	2	DRDYSDHPSGGSYR	1922	Unambiguous	RNA-binding motif protein, X chromosome OS=Homo sapiens OX=9606 GN=RBMX PE=1 SV=3 - [RBMX_HUMAN]	2	1	P38159		HCD	1	0	1	1	0	7.67e-06	32	27	3.08	1	10	43	9082000	3	537.897	1611.68	0	-1.08	23.94	6394	6394	MS2	0/0	0	0	hela_waters_3.raw
High	A	2	RVVDESDETENQEEK	1929	Unambiguous	WD repeat and HMG-box DNA-binding protein 1 OS=Homo sapiens OX=9606 GN=WDHD1 PE=1 SV=1 - [WDHD1_HUMAN]	1	1	O75717		HCD	1	0	1	1	0.003	0.0436	64	82	1.52	1	25	60	362600	3	602.938	1806.8	0	-0.42	23.94	6398	6398	MS2	0/0	0	0	hela_waters_3.raw
Middle	A	2	TDTGEPMGR	1643	Unambiguous	Heat shock protein HSP 90-alpha OS=Homo sapiens OX=9606 GN=HSP90AA1 PE=1 SV=5 - [HS90A_HUMAN]	1	1	P07900		HCD	1	0	1	1	0.018	0.252	30	37	0.75	0	77	60	274900	2	482.213	963.419	0	-0.62	23.94	6399	6399	MS2	0/0	0	0	hela_waters_3.raw
High	A	2	RQLSSSSGNTDTQADEDER	1943	Unambiguous	CAP-Gly domain-containing linker protein 1 OS=Homo sapiens OX=9606 GN=CLIP1 PE=1 SV=2 - [CLIP1_HUMAN]	1	1	P30622		HCD	1	0	1	1	0.002	0.0168	45	35	0.94	1	0	60	363600	3	699.308	2095.91	0	-1.06	23.95	6403	6403	MS2	0/0	0	0	hela_waters_3.raw
High	A	2	DRDYSDHPSGGSYR	1922	Unambiguous	RNA-binding motif protein, X chromosome OS=Homo sapiens OX=9606 GN=RBMX PE=1 SV=3 - [RBMX_HUMAN]	2	1	P38159		HCD	1	0	1	1	0	1.2e-12	29	24	3.28	1	12	60	4041000	4	403.674	1611.68	0	-1.39	23.97	6416	6416	MS2	0/0	0	0	hela_waters_3.raw
High	A	2	DRDYSDHPSGGSYR	1922	Unambiguous	RNA-binding motif protein, X chromosome OS=Homo sapiens OX=9606 GN=RBMX PE=1 SV=3 - [RBMX_HUMAN]	2	1	P38159		HCD	1	0	1	1	0	0.000618	29	23	2.16	1	1	60	2587000	2	806.341	1611.68	0	-1.67	23.98	6417	6417	MS2	0/0	0	0	hela_waters_3.raw
High	A	2	VQQSSESSTSSPSQHEATPGAR	1957	Unambiguous	Zinc finger CCCH domain-containing protein 11B OS=Homo sapiens OX=9606 GN=ZC3H11B PE=4 SV=1 - [ZC11B_HUMAN]	2	1	A0A1B0GTU1		HCD	1	0	1	1	0	4.21e-16	93	95	2.89	0	0	60	714800	3	753.345	2258.02	0	-3.24	23.98	6420	6420	MS2	0/0	0	0	hela_waters_3.raw
Middle	A	2	VTGSLETK	1963	Unambiguous	Voltage-dependent anion-selective channel protein 1 OS=Homo sapiens OX=9606 GN=VDAC1 PE=1 SV=2 - [VDAC1_HUMAN]	1	1	P21796		HCD	1	0	1	1	0.021	0.281	185	200	1.07	0	69	60	390500	2	417.731	834.455	0	-1.67	23.99	6424	6424	MS2	0/0	0	0	hela_waters_3.raw
High	A	2	HLDGEEDGSSDQSQASGTTGGR	1969	Unambiguous	Melanoma-associated antigen D2 OS=Homo sapiens OX=9606 GN=MAGED2 PE=1 SV=2 - [MAGD2_HUMAN]	1	1	Q9UNF1		HCD	1	0	1	1	0	4.21e-16	28	18	2.99	0	9	60	1862000	3	730.976	2190.91	0	-0.41	23.99	6427	6427	MS2	0/0	0	0	hela_waters_3.raw
High	A	2	YHTVNGHNcEVR	1978	Unambiguous	Heterogeneous nuclear ribonucleoprotein A1 OS=Homo sapiens OX=9606 GN=HNRNPA1 PE=1 SV=5 - [ROA1_HUMAN]	1	1	P09651	C9(Carbamidomethyl)	HCD	1	0	1	1	0	1.2e-06	61	67	1.69	0	55	60	592200	3	495.892	1485.66	0	-2.23	24.01	6434	6434	MS2	0/0	0	0	hela_waters_3.raw
High	A	2	TATPQQAQEVHEK	2003	Unambiguous	Triosephosphate isomerase OS=Homo sapiens OX=9606 GN=TPI1 PE=1 SV=3 - [TPIS_HUMAN]	1	1	P60174		HCD	1	0	1	1	0	2.25e-11	196	186	2.18	0	48	60	2057000	3	489.578	1466.72	0	-2.72	24.04	6453	6453	MS2	0/0	0	0	hela_waters_3.raw
High	A	2	GTLVQTK	2007	Unambiguous	Histone H1.5 OS=Homo sapiens OX=9606 GN=HIST1H1B PE=1 SV=3 - [H15_HUMAN]|Histone H1.4 OS=Homo sapiens OX=9606 GN=HIST1H1E PE=1 SV=2 - [H14_HUMAN]	5	2	P16401;P10412		HCD	1	0	1	1	0.007	0.0849	203	185	1.32	0	21	60	1306000	2	373.723	746.439	0	-2.85	24.04	6455	6455	MS2	0/0	0	0	hela_waters_3.raw
Middle	A	2	VVDESDETENQEEK	2040	Unambiguous	WD repeat and HMG-box DNA-binding protein 1 OS=Homo sapiens OX=9606 GN=WDHD1 PE=1 SV=1 - [WDHD1_HUMAN]	1	1	O75717		HCD	1	0	1	1	0.022	0.297	30	31	0.76	0	8	60	1002000	2	825.851	1650.7	0	-1.53	24.09	6478	6478	MS2	0/0	0	0	hela_waters_3.raw
High	A	2	RRPEDYDIHNSR	2042	Unambiguous	YTH domain-containing protein 1 OS=Homo sapiens OX=9606 GN=YTHDC1 PE=1 SV=3 - [YTDC1_HUMAN]	1	1	Q96MU7		HCD	1	0	1	1	0.002	0.0192	139	128	1.03	1	28	60	1222000	4	390.192	1557.75	0	-2.27	24.09	6479	6479	MS2	0/0	0	0	hela_waters_3.raw
Middle	A	2	EKEDDEEEEDEDASGGDQDQEER	2046	Unambiguous	Double-strand-break repair protein rad21 homolog OS=Homo sapiens OX=9606 GN=RAD21 PE=1 SV=2 - [RAD21_HUMAN]	1	1	O60216		HCD	1	0	1	1	0.013	0.196		1	0.94	1	0	60	320400	3	894.998	2682.98	0	-2.76	24.09	6482	6482	MS2	0/0	0	0	hela_waters_3.raw
High	A	2	KVEEEGSPGDPDHEASTQGR	2060	Unambiguous	Opioid growth factor receptor OS=Homo sapiens OX=9606 GN=OGFR PE=1 SV=3 - [OGFR_HUMAN]	1	1	Q9NZT2		HCD	1	0	1	1	0	0.00429	58	69	2.89	1	12	60	1782000	3	708.984	2124.94	0	-2.32	24.12	6496	6496	MS2	0/0	0	0	hela_waters_3.raw
High	A	2	EGEEATAEAEEK	2064	Unambiguous	Protein flightless-1 homolog OS=Homo sapiens OX=9606 GN=FLII PE=1 SV=2 - [FLII_HUMAN]	1	1	Q13045		HCD	1	0	1	1	0	5.67e-07	22	31	1.64	0	23	60	1234000	2	646.777	1292.55	0	-1.74	24.12	6498	6498	MS2	0/0	0	0	hela_waters_3.raw
High	A	2	IAGQVAAANK	2066	Unambiguous	40S ribosomal protein S19 OS=Homo sapiens OX=9606 GN=RPS19 PE=1 SV=2 - [RS19_HUMAN]	1	1	P39019		HCD	1	0	1	1	0	9.3e-07	134	164	1.58	0	56	60	988400	2	471.771	942.535	0	-2.04	24.12	6499	6499	MS2	0/0	0	0	hela_waters_3.raw
High	A	2	VLSTVHTHSSVK	2072	Unambiguous	Aminoacyl tRNA synthase complex-interacting multifunctional protein 2 OS=Homo sapiens OX=9606 GN=AIMP2 PE=1 SV=2 - [AIMP2_HUMAN]	1	1	Q13155		HCD	1	0	1	1	0	0.00464	169	159	1.16	0	50	60	516600	3	432.241	1294.71	0	-1.73	24.13	6502	6502	MS2	0/0	0	0	hela_waters_3.raw
Middle	A	2	ccPEcISRNGYcVYEETGEFmSSNASEVK	2074	Unambiguous	Extracellular matrix protein FRAS1 OS=Homo sapiens OX=9606 GN=FRAS1 PE=1 SV=2 - [FRAS1_HUMAN]	1	1	Q86XX4	C1(Carbamidomethyl); C2(Carbamidomethyl); C5(Carbamidomethyl); C12(Carbamidomethyl); M21(Oxidation)	HCD	1	0	1	1	0.046	0.641	3	3	0.13	1	15	60	155300	4	870.61	3479.42	0.01	6.17	24.13	6503	6503	MS2	0/0	0	0	hela_waters_3.raw
High	A	2	LQQQQRPEDAEDGAEGGGK	2085	Unambiguous	tRNA (cytosine(34)-C(5))-methyltransferase OS=Homo sapiens OX=9606 GN=NSUN2 PE=1 SV=2 - [NSUN2_HUMAN]	1	1	Q08J23		HCD	1	0	1	1	0	1.05e-07	92	98	2.45	0	26	60	288600	3	671.644	2012.92	0	-4.18	24.14	6511	6511	MS2	0/0	0	0	hela_waters_3.raw
High	A	2	HVEASGGSGPGDSGPSDPR	2091	Unambiguous	Zinc finger CCCH domain-containing protein 4 OS=Homo sapiens OX=9606 GN=ZC3H4 PE=1 SV=3 - [ZC3H4_HUMAN]	1	1	Q9UPT8		HCD	1	0	1	1	0	1.39e-09	47	60	2.49	0	9	60	2688000	3	589.262	1765.77	0	-1.02	24.15	6517	6517	MS2	0/0	0	0	hela_waters_3.raw
High	A	2	HVEASGGSGPGDSGPSDPR	2091	Unambiguous	Zinc finger CCCH domain-containing protein 4 OS=Homo sapiens OX=9606 GN=ZC3H4 PE=1 SV=3 - [ZC3H4_HUMAN]	1	1	Q9UPT8		HCD	1	0	1	1	0.002	0.0252	47	59	0.7	0	0	60	438300	2	883.392	1765.78	0	2.1	24.16	6519	6519	MS2	0/0	0	0	hela_waters_3.raw
Middle	A	2	RVETSEHFR	2099	Unambiguous	Lamina-associated polypeptide 2, isoforms beta/gamma OS=Homo sapiens OX=9606 GN=TMPO PE=1 SV=2 - [LAP2B_HUMAN]	1	1	P42167		HCD	1	0	1	1	0.022	0.294	253	210	1.36	1	58	60	414400	3	387.531	1160.58	0	-1.17	24.16	6521	6521	MS2	0/0	0	0	hela_waters_3.raw
High	A	2	NFATSLYSMIKGDTSGDYK	2102	Unambiguous	Annexin A5 OS=Homo sapiens OX=9606 GN=ANXA5 PE=1 SV=2 - [ANXA5_HUMAN]	1	1	P08758		HCD	1	0	1	2	0.005	0.0589	134	140	0.68	1	61	60	205700	4	525.248	2097.97	0	-3.93	24.16	6522	6522	MS2	0/0	0	0	hela_waters_3.raw
High	A	2	NQGGYGGSSSSSSYGSGR	2114	Unambiguous	Heterogeneous nuclear ribonucleoprotein A1 OS=Homo sapiens OX=9606 GN=HNRNPA1 PE=1 SV=5 - [ROA1_HUMAN]	1	1	P09651		HCD	1	0	1	1	0	4.21e-16	13	9	4.38	0	0	12	38240000	2	847.852	1694.7	0	-1.67	24.19	6536	6536	MS2	0/0	0	0	hela_waters_3.raw
High	A	2	HHYEQQQEDLAR	2116	Unambiguous	Chromodomain-helicase-DNA-binding protein 4 OS=Homo sapiens OX=9606 GN=CHD4 PE=1 SV=2 - [CHD4_HUMAN]	3	1	Q14839		HCD	1	0	1	1	0	5.15e-10	90	85	3.11	0	31	55	8047000	3	518.574	1553.71	0	-1.05	24.19	6537	6537	MS2	0/0	0	0	hela_waters_3.raw
High	A	2	LQQQQRPEDAEDGAEGGGK	2085	Unambiguous	tRNA (cytosine(34)-C(5))-methyltransferase OS=Homo sapiens OX=9606 GN=NSUN2 PE=1 SV=2 - [NSUN2_HUMAN]	1	1	Q08J23		HCD	1	0	1	1	0	4.21e-16	106	107	3.09	0	14	60	1390000	2	1006.97	2012.93	0	0.13	24.19	6538	6538	MS2	0/0	0	0	hela_waters_3.raw
High	A	2	LEGQAQAEAK	1618	Unambiguous	Pescadillo homolog OS=Homo sapiens OX=9606 GN=PES1 PE=1 SV=1 - [PESC_HUMAN]	1	1	O00541		HCD	1	0	1	1	0	2.05e-06	146	152	1.69	0	26	60	777900	2	522.769	1044.53	0	-0.86	24.2	6540	6540	MS2	0/0	0	0	hela_waters_3.raw
High	A	2	HHYEQQQEDLAR	2116	Unambiguous	Chromodomain-helicase-DNA-binding protein 4 OS=Homo sapiens OX=9606 GN=CHD4 PE=1 SV=2 - [CHD4_HUMAN]	3	1	Q14839		HCD	1	0	1	1	0.002	0.0173	89	82	1.33	0	0	60	645200	2	777.357	1553.71	0	-2.06	24.2	6544	6544	MS2	0/0	0	0	hela_waters_3.raw
High	A	2	ESDESGESAPDEGGEGAR	2136	Unambiguous	Autophagy-related protein 9A OS=Homo sapiens OX=9606 GN=ATG9A PE=1 SV=3 - [ATG9A_HUMAN]	1	1	Q7Z3C6		HCD	1	0	1	1	0.001	0.00583	8	5	1.58	0	0	60	461600	2	889.847	1778.69	0	-4.65	24.21	6547	6547	MS2	0/0	0	0	hela_waters_3.raw
High	A	2	AHYTHSDYQYSQR	2149	Unambiguous	Plakophilin-2 OS=Homo sapiens OX=9606 GN=PKP2 PE=1 SV=2 - [PKP2_HUMAN]	1	1	Q99959		HCD	1	0	1	1	0	1.34e-06	42	37	2.17	0	52	60	676800	3	552.577	1655.72	0	-1.92	24.22	6554	6554	MS2	0/0	0	0	hela_waters_3.raw
High	A	2	HLTHAQSTLDAK	2153	Unambiguous	3-beta-hydroxysteroid-Delta(8),Delta(7)-isomerase OS=Homo sapiens OX=9606 GN=EBP PE=1 SV=3 - [EBP_HUMAN]	1	1	Q15125		HCD	1	0	1	1	0	3.76e-05	218	213	2.52	0	11	60	2657000	3	441.233	1321.68	0	-2.09	24.23	6557	6557	MS2	0/0	0	0	hela_waters_3.raw
High	A	2	NQGGYGGSSSSSSYGSGR	2114	Unambiguous	Heterogeneous nuclear ribonucleoprotein A1 OS=Homo sapiens OX=9606 GN=HNRNPA1 PE=1 SV=5 - [ROA1_HUMAN]	1	1	P09651		HCD	1	0	1	1	0	2.1e-07	13	9	1.59	0	15	60	1073000	3	565.57	1694.7	0	-2.54	24.23	6562	6562	MS2	0/0	0	0	hela_waters_3.raw
Middle	A	2	DPQQPAQQQQPAQQPK	2163	Unambiguous	Cyclin-K OS=Homo sapiens OX=9606 GN=CCNK PE=1 SV=2 - [CCNK_HUMAN]	1	1	O75909		HCD	1	0	1	1	0.016	0.226	184	172	1.18	0	0	60	691800	2	908.948	1816.89	0	-3.09	24.24	6565	6565	MS2	0/0	0	0	hela_waters_3.raw
Middle	A	2	KVEEEGSPGDPDHEASTQGR	2060	Unambiguous	Opioid growth factor receptor OS=Homo sapiens OX=9606 GN=OGFR PE=1 SV=3 - [OGFR_HUMAN]	1	1	Q9NZT2		HCD	1	0	1	1	0.015	0.218	53	68	1.47	1	54	60	1447000	4	531.99	2124.94	0	-2.5	24.25	6569	6569	MS2	0/0	0	0	hela_waters_3.raw
High	A	2	cEYLmELmTPAAcPEPPPEAPTEDDHDEL	2175	Unambiguous	Glucosidase 2 subunit beta OS=Homo sapiens OX=9606 GN=PRKCSH PE=1 SV=2 - [GLU2B_HUMAN]	1	1	P14314	C1(Carbamidomethyl); M5(Oxidation); M8(Oxidation); C13(Carbamidomethyl)	HCD	1	0	1	1	0.002	0.0166	2	5	0.89	0	0	60	646400	3	1130.47	3389.39	0	2.21	24.25	6572	6572	MS2	0/0	0	0	hela_waters_3.raw
High	A	2	QASEGPLK	1833	Unambiguous	Glyceraldehyde-3-phosphate dehydrogenase OS=Homo sapiens OX=9606 GN=GAPDH PE=1 SV=3 - [G3P_HUMAN]	1	1	P04406		HCD	1	0	1	1	0.003	0.0421	108	129	1.34	0	40	60	922400	2	415.223	829.44	0	-2.28	24.26	6578	6578	MS2	0/0	0	0	hela_waters_3.raw
High	A	2	HYNGEAYEDDEHHPR	1835	Unambiguous	DnaJ homolog subfamily A member 1 OS=Homo sapiens OX=9606 GN=DNAJA1 PE=1 SV=2 - [DNJA1_HUMAN]	1	1	P31689		HCD	1	0	1	1	0	4.21e-16	5	9	3.39	0	11	60	2096000	4	467.944	1868.75	0	-2.68	24.27	6580	6580	MS2	0/0	0	0	hela_waters_3.raw
High	A	2	HYAHTDcPGHADYVK	2188	Unambiguous	Elongation factor Tu, mitochondrial OS=Homo sapiens OX=9606 GN=TUFM PE=1 SV=2 - [EFTU_HUMAN]	1	1	P49411	C7(Carbamidomethyl)	HCD	1	0	1	1	0	4.21e-16	29	30	3.97	0	1	60	5322000	3	590.925	1770.76	0	-3.18	24.27	6582	6582	MS2	0/0	0	0	hela_waters_3.raw
High	A	2	QSSEAEIQAK	2202	Unambiguous	Plectin OS=Homo sapiens OX=9606 GN=PLEC PE=1 SV=3 - [PLEC_HUMAN]	1	1	Q15149		HCD	1	0	1	1	0.001	0.00673	176	168	1.57	0	52	60	649100	2	545.771	1090.53	0	-2.82	24.28	6588	6588	MS2	0/0	0	0	hela_waters_3.raw
High	A	2	HYNGEAYEDDEHHPR	1835	Unambiguous	DnaJ homolog subfamily A member 1 OS=Homo sapiens OX=9606 GN=DNAJA1 PE=1 SV=2 - [DNJA1_HUMAN]	1	1	P31689		HCD	1	0	1	1	0	2.04e-15	5	9	2.42	0	21	60	1473000	3	623.589	1868.75	0	-3.75	24.28	6590	6590	MS2	0/0	0	0	hela_waters_3.raw
Middle	A	2	EEPKEDPSGAAVPEmPK	2215	Unambiguous	Neuron navigator 2 OS=Homo sapiens OX=9606 GN=NAV2 PE=1 SV=3 - [NAV2_HUMAN]	1	1	Q8IVL1	M15(Oxidation)	HCD	1	0	1	2	0.038	0.498	120	109	0.97	1	71	60	437000	4	457.465	1826.84	0	-5.61	24.3	6599	6599	MS2	0/0	0	0	hela_waters_3.raw
High	A	2	TPPSEEDSAEAER	2218	Unambiguous	Small glutamine-rich tetratricopeptide repeat-containing protein alpha OS=Homo sapiens OX=9606 GN=SGTA PE=1 SV=1 - [SGTA_HUMAN]	1	1	O43765		HCD	1	0	1	1	0	4.21e-16	29	26	2.62	0	21	60	5792000	2	709.304	1417.6	0	-4.73	24.3	6602	6602	MS2	0/0	0	0	hela_waters_3.raw
Middle	A	2	HYAHTDcPGHADYVK	2188	Unambiguous	Elongation factor Tu, mitochondrial OS=Homo sapiens OX=9606 GN=TUFM PE=1 SV=2 - [EFTU_HUMAN]	1	1	P49411	C7(Carbamidomethyl)	HCD	1	0	1	1	0.024	0.33	29	31	1.14	0	9	60	1411000	2	885.882	1770.76	0	-4.42	24.31	6603	6603	MS2	0/0	0	0	hela_waters_3.raw
Middle	A	2	LTQTSGETTHTDKEPVGEGK	2228	Unambiguous	Proliferation marker protein Ki-67 OS=Homo sapiens OX=9606 GN=MKI67 PE=1 SV=2 - [KI67_HUMAN]	1	1	P46013		HCD	1	0	1	1	0.031	0.403	144	156	2.21	1	22	60	2606000	4	529.509	2115.02	0	-2.06	24.31	6607	6607	MS2	0/0	0	0	hela_waters_3.raw
Middle	A	2	GAGVHSGERPPHSLSSNAR	2231	Unambiguous	N-alpha-acetyltransferase 30 OS=Homo sapiens OX=9606 GN=NAA30 PE=1 SV=1 - [NAA30_HUMAN]	1	1	Q147X3		HCD	1	0	1	1	0.014	0.202	171	187	1.87	0	23	60	1879000	4	479.741	1915.94	0	-3.74	24.31	6609	6609	MS2	0/0	0	0	hela_waters_3.raw
High	A	2	LTQTSGETTHTDKEPVGEGK	2228	Unambiguous	Proliferation marker protein Ki-67 OS=Homo sapiens OX=9606 GN=MKI67 PE=1 SV=2 - [KI67_HUMAN]	1	1	P46013		HCD	1	0	1	1	0.001	0.0112	147	159	1.41	1	0	60	1955000	3	705.678	2115.02	0	-0.61	24.32	6610	6610	MS2	0/0	0	0	hela_waters_3.raw
High	A	2	APKPDGPGGGPGGSHmGGNYGDDR	2242	Unambiguous	RNA-binding protein FUS OS=Homo sapiens OX=9606 GN=FUS PE=1 SV=1 - [FUS_HUMAN]	1	1	P35637	M16(Oxidation)	HCD	1	0	1	1	0.002	0.0159	26	25	0.62	0	0	60	511400	3	756.994	2268.97	0	-0.01	24.34	6622	6622	MS2	0/0	0	0	hela_waters_3.raw
Middle	A	2	HESLRPAAGQSRPPTAR	2254	Unambiguous	DCC-interacting protein 13-alpha OS=Homo sapiens OX=9606 GN=APPL1 PE=1 SV=1 - [DP13A_HUMAN]	1	1	Q9UKG1		HCD	1	0	1	1	0.017	0.24	207	218	2.76	0	20	60	4483000	4	458.496	1830.96	0	-3.18	24.34	6623	6623	MS2	0/0	0	0	hela_waters_3.raw
High	A	2	QQQAATSESSQSEASVR	2258	Unambiguous	E3 ubiquitin-protein ligase HUWE1 OS=Homo sapiens OX=9606 GN=HUWE1 PE=1 SV=3 - [HUWE1_HUMAN]	1	1	Q7Z6Z7		HCD	1	0	1	1	0	4.21e-16	117	108	2.55	0	0	60	1063000	2	897.414	1793.82	0	-2.72	24.34	6625	6625	MS2	0/0	0	0	hela_waters_3.raw
High	A	2	EGIPPQQQR	2262	Unambiguous	NEDD8 OS=Homo sapiens OX=9606 GN=NEDD8 PE=1 SV=1 - [NEDD8_HUMAN]	1	1	Q15843		HCD	1	0	1	1	0.005	0.0651	201	207	1.06	0	19	60	762900	2	526.777	1052.55	0	-2.2	24.35	6627	6627	MS2	0/0	0	0	hela_waters_3.raw
High	A	2	AAEDDEDDDVDTK	1878	Unambiguous	Prothymosin alpha OS=Homo sapiens OX=9606 GN=PTMA PE=1 SV=2 - [PTMA_HUMAN]	1	1	P06454		HCD	1	0	1	1	0	4.21e-16	5	7	1.87	0	0	60	3180000	2	719.277	1437.55	0	-2.94	24.37	6641	6641	MS2	0/0	0	0	hela_waters_3.raw
High	A	2	YHTINGHNAEVR	2296	Unambiguous	Heterogeneous nuclear ribonucleoproteins A2/B1 OS=Homo sapiens OX=9606 GN=HNRNPA2B1 PE=1 SV=2 - [ROA2_HUMAN]	1	1	P22626		HCD	1	0	1	1	0	2.22e-12	150	155	2.84	0	1	36	9377000	3	470.899	1410.68	0	-2.51	24.38	6645	6645	MS2	0/0	0	0	hela_waters_3.raw
High	A	2	DYSDHPSGGSYR	2298	Unambiguous	RNA-binding motif protein, X chromosome OS=Homo sapiens OX=9606 GN=RBMX PE=1 SV=3 - [RBMX_HUMAN]	2	1	P38159		HCD	1	0	1	1	0	0.000483	21	17	1.69	0	27	53	4918000	3	447.52	1340.55	0	-3.24	24.38	6646	6646	MS2	0/0	0	0	hela_waters_3.raw
High	A	2	SLcEQVSHHPPAAAHHAESK	2302	Unambiguous	Oxysterol-binding protein 1 OS=Homo sapiens OX=9606 GN=OSBP PE=1 SV=1 - [OSBP1_HUMAN]	1	1	P22059	C3(Carbamidomethyl)	HCD	1	0	1	1	0	0.00294	135	130	1.84	0	9	60	1678000	4	549.011	2193.02	0	-2.32	24.38	6648	6648	MS2	0/0	0	0	hela_waters_3.raw
High	A	2	YHTINGHNAEVR	2296	Unambiguous	Heterogeneous nuclear ribonucleoproteins A2/B1 OS=Homo sapiens OX=9606 GN=HNRNPA2B1 PE=1 SV=2 - [ROA2_HUMAN]	1	1	P22626		HCD	1	0	1	1	0	5.12e-05	150	155	1.43	0	3	60	1596000	4	353.426	1410.68	0	-2.54	24.39	6651	6651	MS2	0/0	0	0	hela_waters_3.raw
Middle	A	2	QQQAATSESSQSEASVR	2258	Unambiguous	E3 ubiquitin-protein ligase HUWE1 OS=Homo sapiens OX=9606 GN=HUWE1 PE=1 SV=3 - [HUWE1_HUMAN]	1	1	Q7Z6Z7		HCD	1	0	1	1	0.019	0.258	112	107	0.46	0	57	60	679900	3	598.611	1793.82	0	-4.22	24.39	6656	6656	MS2	0/0	0	0	hela_waters_3.raw
High	A	2	YAAPEQNNDPQQSK	2337	Unambiguous	WD repeat-containing protein 36 OS=Homo sapiens OX=9606 GN=WDR36 PE=1 SV=1 - [WDR36_HUMAN]	1	1	Q8NI36		HCD	1	0	1	1	0	5.79e-06	78	55	1.64	0	4	60	2123000	2	795.362	1589.72	0	-0.95	24.42	6667	6667	MS2	0/0	0	0	hela_waters_3.raw
High	A	2	QVHPDTGISSK	2339	Unambiguous	Histone H2B type 1-J OS=Homo sapiens OX=9606 GN=HIST1H2BJ PE=1 SV=3 - [H2B1J_HUMAN]|Histone H2B type 1-K OS=Homo sapiens OX=9606 GN=HIST1H2BK PE=1 SV=3 - [H2B1K_HUMAN]	15	2	P06899;O60814		HCD	1	0	1	1	0	4.87e-05	152	142	2.35	0	22	60	1622000	3	390.203	1168.59	0	-1.79	24.42	6668	6668	MS2	0/0	0	0	hela_waters_3.raw
Middle	A	2	HAYDLR	2341	Unambiguous	Nebulin OS=Homo sapiens OX=9606 GN=NEB PE=1 SV=5 - [NEBU_HUMAN]	1	1	P20929		HCD	1	0	1	1	0.048	0.664	117	118	1.04	0	45	60	1194000	2	387.697	774.388	0	-2.21	24.42	6669	6669	MS2	0/0	0	0	hela_waters_3.raw
High	A	2	RHFNAPSHIR	2343	Unambiguous	60S ribosomal protein L26 OS=Homo sapiens OX=9606 GN=RPL26 PE=1 SV=1 - [RL26_HUMAN]	1	1	P61254		HCD	1	0	1	1	0	1.26e-09	237	239	2.37	1	21	60	1001000	3	412.222	1234.65	0	-2.15	24.42	6670	6670	MS2	0/0	0	0	hela_waters_3.raw
Middle	A	2	QQSAQSQVSTTAENK	2346	Unambiguous	RNA cytidine acetyltransferase OS=Homo sapiens OX=9606 GN=NAT10 PE=1 SV=2 - [NAT10_HUMAN]	1	1	Q9H0A0		HCD	1	0	1	2	0.012	0.187	135	129	0.89	0	26	60	842900	2	803.884	1606.76	0	-3.19	24.42	6671	6671	MS2	0/0	0	0	hela_waters_3.raw
High	A	2	DRDYSDHPSGGSYR	1922	Unambiguous	RNA-binding motif protein, X chromosome OS=Homo sapiens OX=9606 GN=RBMX PE=1 SV=3 - [RBMX_HUMAN]	2	1	P38159		HCD	1	0	1	1	0.001	0.00643	27	22	2.76	1	13	30	11550000	3	537.897	1611.68	0	-1.87	24.44	6683	6683	MS2	0/0	0	0	hela_waters_3.raw
Middle	A	2	DLPmADLSSFEETSADDFAMEMGLAcVVcR	2367	Unambiguous	Integrator complex subunit 12 OS=Homo sapiens OX=9606 GN=INTS12 PE=1 SV=1 - [INT12_HUMAN]	1	1	Q96CB8	M4(Oxidation); C26(Carbamidomethyl); C29(Carbamidomethyl)	HCD	1	0	1	1	0.04	0.555	3	12	0.22	0	57	60	353200	3	1128.47	3383.4	-0.01	-7.04	24.45	6685	6685	MS2	0/0	0	0	hela_waters_3.raw
Middle	A	2	DLPMADLSSFEETSADDFAmEMGLAcVVcR	2367	Unambiguous	Integrator complex subunit 12 OS=Homo sapiens OX=9606 GN=INTS12 PE=1 SV=1 - [INT12_HUMAN]	1	1	Q96CB8	M20(Oxidation); C26(Carbamidomethyl); C29(Carbamidomethyl)	HCD	1	0	1	2	0.041	0.558	3	12	0.22	0	57	60	353200	3	1128.47	3383.4	-0.01	-7.04	24.45	6685	6685	MS2	0/0	0	0	hela_waters_3.raw
Middle	A	2	DLPMADLSSFEETSADDFAMEmGLAcVVcR	2367	Unambiguous	Integrator complex subunit 12 OS=Homo sapiens OX=9606 GN=INTS12 PE=1 SV=1 - [INT12_HUMAN]	1	1	Q96CB8	M22(Oxidation); C26(Carbamidomethyl); C29(Carbamidomethyl)	HCD	1	0	1	3	0.041	0.558	3	12	0.22	0	57	60	353200	3	1128.47	3383.4	-0.01	-7.04	24.45	6685	6685	MS2	0/0	0	0	hela_waters_3.raw
High	A	2	QVHPDTGISSK	2339	Unambiguous	Histone H2B type 1-J OS=Homo sapiens OX=9606 GN=HIST1H2BJ PE=1 SV=3 - [H2B1J_HUMAN]|Histone H2B type 1-K OS=Homo sapiens OX=9606 GN=HIST1H2BK PE=1 SV=3 - [H2B1K_HUMAN]	15	2	P06899;O60814		HCD	1	0	1	1	0	6e-11	152	142	2.38	0	53	60	5572000	2	584.801	1168.59	0	-1.65	24.45	6686	6686	MS2	0/0	0	0	hela_waters_3.raw
Middle	A	2	RMEEEQHHWDDR	2390	Unambiguous	Zinc finger RNA-binding protein OS=Homo sapiens OX=9606 GN=ZFR PE=1 SV=2 - [ZFR_HUMAN]	1	1	Q96KR1		HCD	1	0	1	1	0.046	0.638	36	22	0.96	1	29	60	904000	3	556.57	1667.69	0	-1.85	24.46	6694	6694	MS2	0/0	0	0	hela_waters_3.raw
High	A	2	FNcEENQHSDScYK	2406	Unambiguous	Cytochrome c oxidase assembly factor 7 OS=Homo sapiens OX=9606 GN=COA7 PE=1 SV=2 - [COA7_HUMAN]	1	1	Q96BR5	C3(Carbamidomethyl); C12(Carbamidomethyl)	HCD	1	0	1	1	0	9.93e-11	3	3	2.26	0	30	60	3629000	3	606.566	1817.68	0	-1.32	24.49	6707	6707	MS2	0/0	0	0	hela_waters_3.raw
High	A	2	TESSPSEASQHSMQSPQK	2408	Unambiguous	Sex comb on midleg-like protein 2 OS=Homo sapiens OX=9606 GN=SCML2 PE=1 SV=1 - [SCML2_HUMAN]	1	1	Q9UQR0		HCD	1	0	1	1	0	4.91e-12	62	65	2.52	0	11	60	2277000	3	649.29	1945.86	0	0.32	24.49	6708	6708	MS2	0/0	0	0	hela_waters_3.raw
High	A	2	DYENDEDVNK	2410	Unambiguous	Trafficking protein particle complex subunit 3 OS=Homo sapiens OX=9606 GN=TRAPPC3 PE=1 SV=1 - [TPPC3_HUMAN]	1	1	O43617		HCD	1	0	1	1	0.003	0.0376	14	14	1.01	0	42	60	2169000	2	620.75	1240.49	0	-2.42	24.49	6709	6709	MS2	0/0	0	0	hela_waters_3.raw
High	A	2	HVLTAAHcIHDGK	2418	Unambiguous	Serine protease 23 OS=Homo sapiens OX=9606 GN=PRSS23 PE=1 SV=1 - [PRS23_HUMAN]	1	1	O95084	C8(Carbamidomethyl)	HCD	1	0	1	2	0.003	0.0404	177	186	0.98	0	29	60	1224000	3	486.913	1458.73	0	-1.07	24.49	6713	6713	MS2	0/0	0	0	hela_waters_3.raw
High	A	2	SQNRPQGQSTQPSNAAGTNTTSASTPR	2425	Unambiguous	Ubiquilin-2 OS=Homo sapiens OX=9606 GN=UBQLN2 PE=1 SV=2 - [UBQL2_HUMAN]	1	1	Q9UHD9		HCD	1	0	1	1	0	4.87e-14	152	148	2.43	0	0	60	806200	3	915.435	2744.29	0	-1.16	24.5	6717	6717	MS2	0/0	0	0	hela_waters_3.raw
High	A	2	NEENTEPGAESSENADDPNK	2436	Unambiguous	Matrin-3 OS=Homo sapiens OX=9606 GN=MATR3 PE=1 SV=2 - [MATR3_HUMAN]	1	1	P43243		HCD	1	0	1	1	0	4.21e-16	16	10	2.66	0	0	60	411500	2	1073.93	2146.86	0	-1.53	24.51	6723	6723	MS2	0/0	0	0	hela_waters_3.raw
High	A	2	SDAEEDGGTVSQEEEDRKPK	2444	Unambiguous	Calnexin OS=Homo sapiens OX=9606 GN=CANX PE=1 SV=2 - [CALX_HUMAN]	1	1	P27824		HCD	1	0	1	1	0	2.16e-10	67	69	4.24	1	5	60	5092000	3	735.997	2205.98	0	1.56	24.52	6728	6728	MS2	0/0	0	0	hela_waters_3.raw
High	A	2	SDAEEDGGTVSQEEEDRKPK	2444	Unambiguous	Calnexin OS=Homo sapiens OX=9606 GN=CANX PE=1 SV=2 - [CALX_HUMAN]	1	1	P27824		HCD	1	0	1	1	0	2.4e-10	73	73	2.61	1	12	60	3433000	4	552.25	2205.98	0	2.52	24.52	6730	6730	MS2	0/0	0	0	hela_waters_3.raw
High	A	2	SSVHQPGSHYcQGcAYK	2452	Unambiguous	Cysteine-rich PDZ-binding protein OS=Homo sapiens OX=9606 GN=CRIPT PE=1 SV=1 - [CRIPT_HUMAN]	1	1	Q9P021	C11(Carbamidomethyl); C14(Carbamidomethyl)	HCD	1	0	1	1	0.001	0.00757	25	24	1.67	0	62	60	1461000	3	655.949	1965.83	0	-1.01	24.53	6733	6733	MS2	0/0	0	0	hela_waters_3.raw
High	A	2	FNcEENQHSDScYK	2406	Unambiguous	Cytochrome c oxidase assembly factor 7 OS=Homo sapiens OX=9606 GN=COA7 PE=1 SV=2 - [COA7_HUMAN]	1	1	Q96BR5	C3(Carbamidomethyl); C12(Carbamidomethyl)	HCD	1	0	1	1	0	2.97e-05	3	3	1.61	0	29	60	1354000	2	909.344	1817.68	0	-2.86	24.53	6734	6734	MS2	0/0	0	0	hela_waters_3.raw
High	A	2	VEEEGSPGDPDHEASTQGR	2458	Unambiguous	Opioid growth factor receptor OS=Homo sapiens OX=9606 GN=OGFR PE=1 SV=3 - [OGFR_HUMAN]	1	1	Q9NZT2		HCD	1	0	1	1	0.005	0.0654	29	31	2.28	0	30	60	1145000	3	666.287	1996.85	0	-1.34	24.53	6735	6735	MS2	0/0	0	0	hela_waters_3.raw
High	A	2	VAEEEETSVK	2460	Unambiguous	Nucleolar protein 58 OS=Homo sapiens OX=9606 GN=NOP58 PE=1 SV=1 - [NOP58_HUMAN]	1	1	Q9Y2X3		HCD	1	0	1	1	0	4.53e-12	162	151	1.98	0	32	60	1007000	2	560.773	1120.54	0	2.21	24.53	6736	6736	MS2	0/0	0	0	hela_waters_3.raw
High	A	2	VELESR	2464	Unambiguous	Keratin, type II cytoskeletal 8 OS=Homo sapiens OX=9606 GN=KRT8 PE=1 SV=7 - [K2C8_HUMAN]	1	1	P05787		HCD	1	0	1	1	0.004	0.0482	266	278	1.11	0	19	60	683900	2	366.698	732.388	0	-0.86	24.54	6738	6738	MS2	0/0	0	0	hela_waters_3.raw
High	A	2	GVPAGNSDTEGGQPGR	2471	Unambiguous	Apoptotic chromatin condensation inducer in the nucleus OS=Homo sapiens OX=9606 GN=ACIN1 PE=1 SV=2 - [ACINU_HUMAN]	1	1	Q9UKV3		HCD	1	0	1	1	0	3.52e-09	105	87	1.41	0	27	60	1656000	2	749.847	1498.69	0	-0.57	24.54	6742	6742	MS2	0/0	0	0	hela_waters_3.raw
High	A	2	EGIPPDQQR	2479	Unambiguous	Ubiquitin-40S ribosomal protein S27a OS=Homo sapiens OX=9606 GN=RPS27A PE=1 SV=2 - [RS27A_HUMAN]	4	1	P62979		HCD	1	0	1	1	0.001	0.00967	190	185	1.62	0	9	23	13280000	2	520.262	1039.52	0	-0.92	24.56	6749	6749	MS2	0/0	0	0	hela_waters_3.raw
High	A	2	ATcAPQHGAPGPGPADASK	2481	Unambiguous	Filamin-A OS=Homo sapiens OX=9606 GN=FLNA PE=1 SV=4 - [FLNA_HUMAN]	1	1	P21333	C3(Carbamidomethyl)	HCD	1	0	1	1	0	4.21e-16	118	117	4.45	0	7	60	6360000	3	597.28	1789.83	0	-1.16	24.56	6750	6750	MS2	0/0	0	0	hela_waters_3.raw
High	A	2	NEENTEPGAESSENADDPNK	2436	Unambiguous	Matrin-3 OS=Homo sapiens OX=9606 GN=MATR3 PE=1 SV=2 - [MATR3_HUMAN]	1	1	P43243		HCD	1	0	1	1	0	9.69e-11	16	10	2.44	0	0	60	2762000	3	716.292	2146.86	0	-1.23	24.56	6752	6752	MS2	0/0	0	0	hela_waters_3.raw
High	A	2	EEASGSSVTAEEAK	2489	Unambiguous	X-ray repair cross-complementing protein 5 OS=Homo sapiens OX=9606 GN=XRCC5 PE=1 SV=3 - [XRCC5_HUMAN]	1	1	P13010		HCD	1	0	1	1	0	4.21e-16	75	78	2.87	0	38	60	1394000	2	697.817	1394.63	0	-0.62	24.57	6755	6755	MS2	0/0	0	0	hela_waters_3.raw
High	A	2	LAQHITYVHQHSR	2491	Unambiguous	DNA replication licensing factor MCM7 OS=Homo sapiens OX=9606 GN=MCM7 PE=1 SV=4 - [MCM7_HUMAN]	1	1	P33993		HCD	1	0	1	1	0	1.35e-13	220	223	2.43	0	36	60	1242000	4	398.212	1589.83	0	-1.58	24.57	6756	6756	MS2	0/0	0	0	hela_waters_3.raw
High	A	2	LAQHITYVHQHSR	2491	Unambiguous	DNA replication licensing factor MCM7 OS=Homo sapiens OX=9606 GN=MCM7 PE=1 SV=4 - [MCM7_HUMAN]	1	1	P33993		HCD	1	0	1	1	0	4.57e-06	234	219	1.13	0	35	60	1072000	3	530.615	1589.83	0	-0.38	24.57	6757	6757	MS2	0/0	0	0	hela_waters_3.raw
High	A	2	GQPSSAEPEDAAGSR	2513	Unambiguous	Tumor necrosis factor alpha-induced protein 2 OS=Homo sapiens OX=9606 GN=TNFAIP2 PE=2 SV=2 - [TNAP2_HUMAN]	1	1	Q03169		HCD	1	0	1	1	0	0.00276	61	53	1.46	0	0	60	1199000	2	729.825	1458.64	0	-1.47	24.58	6765	6765	MS2	0/0	0	0	hela_waters_3.raw
Middle	A	2	YcDPDSYHR	2529	Unambiguous	Splicing factor U2AF 65 kDa subunit OS=Homo sapiens OX=9606 GN=U2AF2 PE=1 SV=4 - [U2AF2_HUMAN]	1	1	P26368	C2(Carbamidomethyl)	HCD	1	0	1	1	0.047	0.649	11	8	1.98	0	30	51	4765000	3	404.829	1212.47	0	-1.3	24.6	6773	6773	MS2	0/0	0	0	hela_waters_3.raw
High	A	2	SAEIDSDDTGGSAAQK	2531	Unambiguous	Kinesin-1 heavy chain OS=Homo sapiens OX=9606 GN=KIF5B PE=1 SV=1 - [KINH_HUMAN]	1	1	P33176		HCD	1	0	1	1	0	4.21e-16	54	60	2.58	0	19	60	2088000	2	776.341	1551.67	0	-1.92	24.6	6774	6774	MS2	0/0	0	0	hela_waters_3.raw
High	A	2	ATcAPQHGAPGPGPADASK	2481	Unambiguous	Filamin-A OS=Homo sapiens OX=9606 GN=FLNA PE=1 SV=4 - [FLNA_HUMAN]	1	1	P21333	C3(Carbamidomethyl)	HCD	1	0	1	1	0	4.21e-16	116	118	3.22	0	39	60	1691000	2	895.416	1789.82	0	-2.14	24.6	6776	6776	MS2	0/0	0	0	hela_waters_3.raw
High	A	2	TDGDDTETVPSEQSHASGK	2504	Unambiguous	Transcription factor 25 OS=Homo sapiens OX=9606 GN=TCF25 PE=1 SV=1 - [TCF25_HUMAN]	1	1	Q9BQ70		HCD	1	0	1	1	0	0.00546	40	36	1.15	0	0	60	1628000	3	654.282	1960.83	0	-2.82	24.6	6777	6777	MS2	0/0	0	0	hela_waters_3.raw
High	A	2	ADDMSDDQGTSVQSK	2564	Unambiguous	Chromatin assembly factor 1 subunit A OS=Homo sapiens OX=9606 GN=CHAF1A PE=1 SV=3 - [CAF1A_HUMAN]	1	1	Q13111		HCD	1	0	1	1	0	1.53e-08	21	21	1.96	0	0	60	1655000	2	792.327	1583.65	0	-1.44	24.63	6793	6793	MS2	0/0	0	0	hela_waters_3.raw
High	A	2	QSSQLDEDRTEAANR	2576	Unambiguous	Serine-protein kinase ATM OS=Homo sapiens OX=9606 GN=ATM PE=1 SV=4 - [ATM_HUMAN]	1	1	Q13315		HCD	1	0	1	1	0	9.58e-08	103	92	2.75	1	46	60	1206000	3	573.934	1719.79	0	-1.8	24.64	6800	6800	MS2	0/0	0	0	hela_waters_3.raw
High	A	2	IETDEEEScDNAHGDANQPAR	2582	Unambiguous	Remodeling and spacing factor 1 OS=Homo sapiens OX=9606 GN=RSF1 PE=1 SV=2 - [RSF1_HUMAN]	1	1	Q96T23	C9(Carbamidomethyl)	HCD	1	0	1	1	0	0.00108	11	9	1.35	0	45	60	711400	3	786.657	2357.96	0	1.19	24.65	6804	6804	MS2	0/0	0	0	hela_waters_3.raw
High	A	2	LQQQQRPEDAEDGAEGGGK	2085	Unambiguous	tRNA (cytosine(34)-C(5))-methyltransferase OS=Homo sapiens OX=9606 GN=NSUN2 PE=1 SV=2 - [NSUN2_HUMAN]	1	1	Q08J23		HCD	1	0	1	1	0	2.74e-08	106	108	3.05	0	24	59	6846000	3	671.647	2012.93	0	-0.73	24.66	6809	6809	MS2	0/0	0	0	hela_waters_3.raw
High	A	2	EGEEATAEAEEK	2064	Unambiguous	Protein flightless-1 homolog OS=Homo sapiens OX=9606 GN=FLII PE=1 SV=2 - [FLII_HUMAN]	1	1	Q13045		HCD	1	0	1	1	0	1.81e-12	23	34	2.25	0	83	60	953800	2	646.776	1292.55	0	-2.87	24.66	6810	6810	MS2	0/0	0	0	hela_waters_3.raw
High	A	2	cEMEQQNQEYK	1921	Unambiguous	Keratin, type I cytoskeletal 17 OS=Homo sapiens OX=9606 GN=KRT17 PE=1 SV=2 - [K1C17_HUMAN]	2	1	Q04695	C1(Carbamidomethyl)	HCD	1	0	1	1	0	4.21e-16	11	20	3.68	0	6	23	20990000	2	743.8	1486.59	0	-0.87	24.67	6812	6812	MS2	0/0	0	0	hela_waters_3.raw
High	A	2	AEGDSAGTAGTPGGTPAGDK	2605	Unambiguous	SWI/SNF-related matrix-associated actin-dependent regulator of chromatin subfamily D member 2 OS=Homo sapiens OX=9606 GN=SMARCD2 PE=1 SV=3 - [SMRD2_HUMAN]	1	1	Q92925		HCD	1	0	1	1	0	1.06e-14	70	64	1.82	0	44	60	2333000	2	858.886	1716.76	0	-1.47	24.67	6818	6818	MS2	0/0	0	0	hela_waters_3.raw
Middle	A	2	TQHHVEALVEHQNGK	2574	Unambiguous	39S ribosomal protein L18, mitochondrial OS=Homo sapiens OX=9606 GN=MRPL18 PE=1 SV=1 - [RM18_HUMAN]	1	1	Q9H0U6		HCD	1	0	1	1	0.011	0.162	181	207	1.35	0	63	60	1933000	3	576.289	1726.85	0	-4.9	24.68	6825	6825	MS2	0/0	0	0	hela_waters_3.raw
High	A	2	NQGGYGGSSSSSSYGSGR	2114	Unambiguous	Heterogeneous nuclear ribonucleoprotein A1 OS=Homo sapiens OX=9606 GN=HNRNPA1 PE=1 SV=5 - [ROA1_HUMAN]	1	1	P09651		HCD	1	0	1	1	0	4.21e-16	13	9	3.98	0	1	5	69240000	2	847.852	1694.7	0	-1.74	24.7	6830	6830	MS2	0/0	0	0	hela_waters_3.raw
High	A	2	NSNQLGGNTESSESSETcSSK	2631	Unambiguous	CCR4-NOT transcription complex subunit 10 OS=Homo sapiens OX=9606 GN=CNOT10 PE=1 SV=1 - [CNO10_HUMAN]	1	1	Q9H9A5	C18(Carbamidomethyl)	HCD	1	0	1	1	0.004	0.0538	13	14	0.98	0	0	60	731600	2	1101.95	2202.9	0	-1.39	24.7	6832	6832	MS2	0/0	0	0	hela_waters_3.raw
High	A	2	cDSSPDSAEDVR	2633	Unambiguous	Alpha-2-HS-glycoprotein OS=Homo sapiens OX=9606 GN=AHSG PE=1 SV=2 - [FETUA_HUMAN]	1	1	P02765	C1(Carbamidomethyl)	HCD	1	0	1	1	0	4.21e-16	11	8	2.82	0	2	10	44100000	2	669.267	1337.53	0	-1.24	24.7	6833	6833	MS2	0/0	0	0	hela_waters_3.raw
High	A	2	DDDRTPGLHGDcDDDK	2635	Unambiguous	Zinc finger protein-like 1 OS=Homo sapiens OX=9606 GN=ZFPL1 PE=1 SV=2 - [ZFPL1_HUMAN]	1	1	O95159	C12(Carbamidomethyl)	HCD	1	0	1	1	0	5.15e-07	6	8	2.28	1	41	60	2786000	3	610.911	1830.72	0	-0.92	24.7	6835	6835	MS2	0/0	0	0	hela_waters_3.raw
High	A	2	DADAGDEDEESEEPR	2637	Unambiguous	Opioid growth factor receptor OS=Homo sapiens OX=9606 GN=OGFR PE=1 SV=3 - [OGFR_HUMAN]	1	1	Q9NZT2		HCD	1	0	1	1	0	4.21e-16	3	6	2.34	0	0	60	1682000	2	832.311	1663.61	0	-3.22	24.71	6836	6836	MS2	0/0	0	0	hela_waters_3.raw
High	A	2	DGETPDPEDPSRK	2642	Unambiguous	Leukotriene A-4 hydrolase OS=Homo sapiens OX=9606 GN=LTA4H PE=1 SV=2 - [LKHA4_HUMAN]	1	1	P09960		HCD	1	0	1	1	0	0.00565	53	63	1.91	1	20	60	3895000	2	721.823	1442.64	0	-0.61	24.71	6839	6839	MS2	0/0	0	0	hela_waters_3.raw
High	A	2	FHSPPDKDEAEAPSQK	2646	Unambiguous	DNA repair protein XRCC1 OS=Homo sapiens OX=9606 GN=XRCC1 PE=1 SV=2 - [XRCC1_HUMAN]	1	1	P18887		HCD	1	0	1	1	0.002	0.0177	143	134	1.62	1	15	60	2708000	3	594.948	1782.83	0	-0.7	24.71	6841	6841	MS2	0/0	0	0	hela_waters_3.raw
High	A	2	DPAEGDGAQPEETPRDGDKPEETQGK	2652	Unambiguous	Neutral alpha-glucosidase AB OS=Homo sapiens OX=9606 GN=GANAB PE=1 SV=3 - [GANAB_HUMAN]	1	1	Q14697		HCD	1	0	1	1	0	5.89e-06	35	47	2.04	1	24	60	666000	4	689.058	2753.21	0	-0.94	24.72	6844	6844	MS2	0/0	0	0	hela_waters_3.raw
High	A	2	ALEGVHYIADHLR	2664	Unambiguous	Neuronal acetylcholine receptor subunit alpha-2 OS=Homo sapiens OX=9606 GN=CHRNA2 PE=1 SV=2 - [ACHA2_HUMAN]	1	1	Q15822		HCD	1	0	1	4	0.002	0.027	203	206	1.03	0	26	60	730100	4	374.205	1493.8	0	7.38	24.73	6849	6849	MS2	0/0	0	0	hela_waters_3.raw
High	A	2	HLTHAQSTLDAK	2153	Unambiguous	3-beta-hydroxysteroid-Delta(8),Delta(7)-isomerase OS=Homo sapiens OX=9606 GN=EBP PE=1 SV=3 - [EBP_HUMAN]	1	1	Q15125		HCD	1	0	1	1	0	0.00157	222	214	2.38	0	21	60	1700000	3	441.233	1321.68	0	-1.74	24.73	6851	6851	MS2	0/0	0	0	hela_waters_3.raw
High	A	2	RHLTGEFEK	2676	Unambiguous	GTP-binding nuclear protein Ran OS=Homo sapiens OX=9606 GN=RAN PE=1 SV=3 - [RAN_HUMAN]	1	1	P62826		HCD	1	0	1	1	0.001	0.00742	161	175	2.41	1	13	60	3017000	3	372.864	1116.58	0	-1.8	24.74	6855	6855	MS2	0/0	0	0	hela_waters_3.raw
High	A	2	HFESQSDDPHFHEK	2678	Unambiguous	Caspase-7 OS=Homo sapiens OX=9606 GN=CASP7 PE=1 SV=1 - [CASP7_HUMAN]	1	1	P55210		HCD	1	0	1	1	0	2.03e-10	35	30	2.64	0	43	60	2974000	3	580.584	1739.74	0	-2.64	24.74	6856	6856	MS2	0/0	0	0	hela_waters_3.raw
High	A	2	SSGAASSAPGGGDGAEYK	2682	Unambiguous	RNA-binding protein 15 OS=Homo sapiens OX=9606 GN=RBM15 PE=1 SV=2 - [RBM15_HUMAN]	1	1	Q96T37		HCD	1	0	1	1	0.001	0.00639	49	53	1.73	0	0	60	1329000	2	784.843	1568.68	0	-1.86	24.74	6858	6858	MS2	0/0	0	0	hela_waters_3.raw
High	A	2	QEEEQDLDGEK	2688	Unambiguous	Matrix-remodeling-associated protein 7 OS=Homo sapiens OX=9606 GN=MXRA7 PE=1 SV=1 - [MXRA7_HUMAN]	1	1	P84157		HCD	1	0	1	1	0	1.57e-07	31	24	2.07	0	28	60	1259000	2	660.281	1319.55	0	-4.49	24.75	6861	6861	MS2	0/0	0	0	hela_waters_3.raw
High	A	2	EEDEEPESPPEK	2694	Unambiguous	Nuclear ubiquitous casein and cyclin-dependent kinase substrate 1 OS=Homo sapiens OX=9606 GN=NUCKS1 PE=1 SV=1 - [NUCKS_HUMAN]	1	1	Q9H1E3		HCD	1	0	1	1	0	1.91e-13	24	21	2.25	0	16	60	5866000	2	707.795	1414.58	0	-1.44	24.75	6864	6864	MS2	0/0	0	0	hela_waters_3.raw
Middle	A	2	HFESQSDDPHFHEK	2678	Unambiguous	Caspase-7 OS=Homo sapiens OX=9606 GN=CASP7 PE=1 SV=1 - [CASP7_HUMAN]	1	1	P55210		HCD	1	0	1	1	0.01	0.142	35	30	1.67	0	59	60	1746000	4	435.69	1739.74	0	-2.68	24.75	6865	6865	MS2	0/0	0	0	hela_waters_3.raw
High	A	2	NYQQNYQNSESGEK	2707	Unambiguous	Nuclease-sensitive element-binding protein 1 OS=Homo sapiens OX=9606 GN=YBX1 PE=1 SV=3 - [YBOX1_HUMAN]	1	1	P67809		HCD	1	0	1	1	0	4.21e-16	26	36	3.12	0	3	21	18040000	2	844.86	1688.71	0	-0.98	24.77	6872	6872	MS2	0/0	0	0	hela_waters_3.raw
High	A	2	ENQQATSGPNQPSVR	2715	Unambiguous	Y-box-binding protein 3 OS=Homo sapiens OX=9606 GN=YBX3 PE=1 SV=4 - [YBOX3_HUMAN]	1	1	P16989		HCD	1	0	1	1	0	1.78e-14	138	138	2.6	0	25	15	23030000	2	806.885	1612.76	0	-2.39	24.77	6876	6876	MS2	0/0	0	0	hela_waters_3.raw
High	A	2	SYSEDDIHR	2717	Unambiguous	YTH domain-containing family protein 1 OS=Homo sapiens OX=9606 GN=YTHDF1 PE=1 SV=1 - [YTHD1_HUMAN]	3	1	Q9BYJ9		HCD	1	0	1	1	0	1.21e-07	42	51	2.26	0	12	41	8630000	2	561.246	1121.48	0	-1.57	24.78	6877	6877	MS2	0/0	0	0	hela_waters_3.raw
High	A	2	NKYEDEINKR	2719	Unambiguous	Keratin, type II cytoskeletal 8 OS=Homo sapiens OX=9606 GN=KRT8 PE=1 SV=7 - [K2C8_HUMAN]	6	1	P05787		HCD	1	0	1	1	0	3.58e-06	197	216	3.15	2	23	60	3915000	3	436.889	1308.65	0	-0.84	24.78	6878	6878	MS2	0/0	0	0	hela_waters_3.raw
High	A	2	SYSEDDIHR	2717	Unambiguous	YTH domain-containing family protein 1 OS=Homo sapiens OX=9606 GN=YTHDF1 PE=1 SV=1 - [YTHD1_HUMAN]	3	1	Q9BYJ9		HCD	1	0	1	1	0	1.19e-08	51	57	2.14	0	16	60	3843000	3	374.5	1121.48	0	-1.15	24.78	6879	6879	MS2	0/0	0	0	hela_waters_3.raw
High	A	2	QQGTSVAQSGAQAPGR	2723	Unambiguous	Replication initiator 1 OS=Homo sapiens OX=9606 GN=REPIN1 PE=1 SV=1 - [REPI1_HUMAN]	1	1	Q9BWE0		HCD	1	0	1	1	0	6.99e-14	148	137	2.72	0	45	60	3638000	2	771.884	1542.76	0	-1.33	24.78	6880	6880	MS2	0/0	0	0	hela_waters_3.raw
Middle	A	2	cPcDAETDQAPEGEK	2732	Unambiguous	Palmitoyltransferase ZDHHC6 OS=Homo sapiens OX=9606 GN=ZDHHC6 PE=1 SV=1 - [ZDHC6_HUMAN]	1	1	Q9H6R6	C1(Carbamidomethyl); C3(Carbamidomethyl)	HCD	1	0	1	1	0.012	0.18	6	4	0.78	0	0	60	512400	2	853.834	1706.66	0	-1.9	24.79	6886	6886	MS2	0/0	0	0	hela_waters_3.raw
High	A	2	KTDAPQPDVKEEEEEK	2734	Unambiguous	Calnexin OS=Homo sapiens OX=9606 GN=CANX PE=1 SV=2 - [CALX_HUMAN]	1	1	P27824		HCD	1	0	1	1	0	4.21e-16	142	151	4.37	2	18	42	8064000	3	624.633	1871.88	0	-1.17	24.79	6887	6887	MS2	0/0	0	0	hela_waters_3.raw
Middle	A	2	RMEELHNQEMQK	2738	Unambiguous	Splicing factor, proline- and glutamine-rich OS=Homo sapiens OX=9606 GN=SFPQ PE=1 SV=2 - [SFPQ_HUMAN]	1	1	P23246		HCD	1	0	1	1	0.014	0.209	111	120	2.6	1	52	60	2123000	3	524.914	1572.73	0	0.58	24.8	6890	6890	MS2	0/0	0	0	hela_waters_3.raw
High	A	2	GEEGHDPKEPEQLR	2740	Unambiguous	Heterogeneous nuclear ribonucleoprotein A3 OS=Homo sapiens OX=9606 GN=HNRNPA3 PE=1 SV=2 - [ROA3_HUMAN]	1	1	P51991		HCD	1	0	1	1	0	2.43e-06	140	131	2.07	1	67	60	1223000	3	540.925	1620.76	0	-1.35	24.8	6891	6891	MS2	0/0	0	0	hela_waters_3.raw
High	A	2	HYAHTDcPGHADYVK	2188	Unambiguous	Elongation factor Tu, mitochondrial OS=Homo sapiens OX=9606 GN=TUFM PE=1 SV=2 - [EFTU_HUMAN]	1	1	P49411	C7(Carbamidomethyl)	HCD	1	0	1	1	0	6.88e-14	37	37	2.9	0	3	17	18670000	4	443.446	1770.76	0	-1.12	24.8	6893	6893	MS2	0/0	0	0	hela_waters_3.raw
High	A	2	HYAHTDcPGHADYVK	2188	Unambiguous	Elongation factor Tu, mitochondrial OS=Homo sapiens OX=9606 GN=TUFM PE=1 SV=2 - [EFTU_HUMAN]	1	1	P49411	C7(Carbamidomethyl)	HCD	1	0	1	1	0	2.55e-10	31	32	2.58	0	25	50	5141000	3	590.925	1770.76	0	-2.98	24.8	6894	6894	MS2	0/0	0	0	hela_waters_3.raw
High	A	2	IEGDETSTEAATR	2749	Unambiguous	DNA-directed RNA polymerases I, II, and III subunit RPABC3 OS=Homo sapiens OX=9606 GN=POLR2H PE=1 SV=4 - [RPAB3_HUMAN]	1	1	P52434		HCD	1	0	1	1	0	4.21e-16	75	89	2.82	0	8	20	23810000	2	690.317	1379.63	0	-1.93	24.81	6896	6896	MS2	0/0	0	0	hela_waters_3.raw
High	A	2	APKPDGPGGGPGGSHMGGNYGDDRR	2757	Unambiguous	RNA-binding protein FUS OS=Homo sapiens OX=9606 GN=FUS PE=1 SV=1 - [FUS_HUMAN]	1	1	P35637		HCD	1	0	1	1	0	1.12e-10	66	68	3.99	1	1	60	3733000	4	603.024	2409.07	0	-0.98	24.81	6900	6900	MS2	0/0	0	0	hela_waters_3.raw
High	A	2	ISSPTETER	2759	Unambiguous	Protein S100-A11 OS=Homo sapiens OX=9606 GN=S100A11 PE=1 SV=2 - [S10AB_HUMAN]	1	1	P31949		HCD	1	0	1	1	0	8.55e-11	182	194	2.17	0	25	60	4252000	2	510.253	1019.5	0	-1.2	24.82	6901	6901	MS2	0/0	0	0	hela_waters_3.raw
High	A	2	DSYVGDEAQSK	2761	Unambiguous	Actin, alpha cardiac muscle 1 OS=Homo sapiens OX=9606 GN=ACTC1 PE=1 SV=1 - [ACTC_HUMAN]|Actin, cytoplasmic 1 OS=Homo sapiens OX=9606 GN=ACTB PE=1 SV=1 - [ACTB_HUMAN]	6	2	P68032;P60709		HCD	1	0	1	1	0	4.63e-09	51	49	2.1	0	16	60	4056000	2	599.764	1198.52	0	-0.73	24.82	6902	6902	MS2	0/0	0	0	hela_waters_3.raw
High	A	2	DAVTYTEHAK	2771	Unambiguous	Histone H4 OS=Homo sapiens OX=9606 GN=HIST1H4A PE=1 SV=2 - [H4_HUMAN]	1	1	P62805		HCD	1	0	1	1	0	0.000692	149	146	1.73	0	12	60	2275000	3	378.852	1134.54	0	-1.21	24.82	6907	6907	MS2	0/0	0	0	hela_waters_3.raw
High	A	2	MEQQEMAQQER	2773	Unambiguous	Ribosomal RNA processing protein 36 homolog OS=Homo sapiens OX=9606 GN=RRP36 PE=1 SV=1 - [RRP36_HUMAN]	1	1	Q96EU6		HCD	1	0	1	1	0	4.21e-16	29	33	2.39	0	29	60	2214000	2	704.301	1407.6	0	-2.8	24.83	6908	6908	MS2	0/0	0	0	hela_waters_3.raw
High	A	2	SQLGAHHTTPVGDGAAGTR	2782	Unambiguous	Transmembrane protein 41B OS=Homo sapiens OX=9606 GN=TMEM41B PE=1 SV=1 - [TM41B_HUMAN]	1	1	Q5BJD5		HCD	1	0	1	1	0	4.21e-16	192	186	2.99	0	60	60	3948000	3	611.638	1832.9	0	-0.54	24.83	6912	6912	MS2	0/0	0	0	hela_waters_3.raw
High	A	2	AQAVSEEEEEEEGK	2784	Unambiguous	ATP-dependent RNA helicase DDX24 OS=Homo sapiens OX=9606 GN=DDX24 PE=1 SV=1 - [DDX24_HUMAN]	1	1	Q9GZR7		HCD	1	0	1	1	0	4.21e-16	39	37	2.76	0	4	60	5750000	2	782.335	1563.66	0	-1.36	24.84	6914	6914	MS2	0/0	0	0	hela_waters_3.raw
High	A	2	AVTEQGHELSNEER	2788	Unambiguous	14-3-3 protein beta/alpha OS=Homo sapiens OX=9606 GN=YWHAB PE=1 SV=3 - [1433B_HUMAN]	1	1	P31946		HCD	1	0	1	1	0	1.22e-15	117	133	2.87	0	4	11	34500000	3	533.585	1598.74	0	-0.61	24.84	6917	6917	MS2	0/0	0	0	hela_waters_3.raw
High	A	2	AVTEQGHELSNEER	2788	Unambiguous	14-3-3 protein beta/alpha OS=Homo sapiens OX=9606 GN=YWHAB PE=1 SV=3 - [1433B_HUMAN]	1	1	P31946		HCD	1	0	1	1	0	4.21e-16	122	135	3.25	0	0	43	13860000	2	799.873	1598.74	0	-1.4	24.84	6918	6918	MS2	0/0	0	0	hela_waters_3.raw
High	A	2	FQRPGDPQSAQDK	2792	Unambiguous	Splicing factor 1 OS=Homo sapiens OX=9606 GN=SF1 PE=1 SV=4 - [SF01_HUMAN]	1	1	Q15637		HCD	1	0	1	1	0	0.000629	139	133	2.01	0	25	29	11530000	3	491.907	1473.71	0	-0.26	24.85	6919	6919	MS2	0/0	0	0	hela_waters_3.raw
High	A	2	NKYEDEINKR	2719	Unambiguous	Keratin, type II cytoskeletal 8 OS=Homo sapiens OX=9606 GN=KRT8 PE=1 SV=7 - [K2C8_HUMAN]	6	1	P05787		HCD	1	0	1	1	0.002	0.0205	203	220	2.16	2	29	58	8986000	2	654.83	1308.65	0	-1.09	24.85	6920	6920	MS2	0/0	0	0	hela_waters_3.raw
High	A	2	cAAPRPPSSSPEQR	2796	Unambiguous	Serine/threonine-protein phosphatase 6 regulatory subunit 3 OS=Homo sapiens OX=9606 GN=PPP6R3 PE=1 SV=2 - [PP6R3_HUMAN]	1	1	Q5H9R7	C1(Carbamidomethyl)	HCD	1	0	1	1	0	4.21e-16	159	171	2.86	0	53	37	8345000	3	513.916	1539.73	0	-0.37	24.85	6921	6921	MS2	0/0	0	0	hela_waters_3.raw
High	A	2	APKPDGPGGGPGGSHMGGNYGDDRR	2757	Unambiguous	RNA-binding protein FUS OS=Homo sapiens OX=9606 GN=FUS PE=1 SV=1 - [FUS_HUMAN]	1	1	P35637		HCD	1	0	1	1	0	0.000811	66	68	3.13	1	19	30	5174000	5	482.62	2409.07	0	-1.03	24.85	6922	6922	MS2	0/0	0	0	hela_waters_3.raw
High	A	2	VSQGSKDPAEGDGAQPEETPR	2802	Unambiguous	Neutral alpha-glucosidase AB OS=Homo sapiens OX=9606 GN=GANAB PE=1 SV=3 - [GANAB_HUMAN]	1	1	Q14697		HCD	1	0	1	1	0	4.21e-16	109	108	3.87	1	27	60	4769000	3	719.001	2154.99	0	-0.71	24.85	6924	6924	MS2	0/0	0	0	hela_waters_3.raw
High	A	2	HMAAASAEcQNYAK	2806	Unambiguous	Ribosome-binding protein 1 OS=Homo sapiens OX=9606 GN=RRBP1 PE=1 SV=5 - [RRBP1_HUMAN]	1	1	Q9P2E9	C9(Carbamidomethyl)	HCD	1	0	1	1	0	2.71e-05	59	54	2.43	0	34	60	4256000	3	517.894	1551.67	0	-0.23	24.86	6926	6926	MS2	0/0	0	0	hela_waters_3.raw
High	A	2	QQIcNQQPPcSR	2808	Unambiguous	Zinc finger CCCH-type antiviral protein 1 OS=Homo sapiens OX=9606 GN=ZC3HAV1 PE=1 SV=3 - [ZCCHV_HUMAN]	1	1	Q7Z2W4	C4(Carbamidomethyl); C10(Carbamidomethyl)	HCD	1	0	1	1	0	1.25e-14	71	69	3.19	0	0	60	4176000	2	758.339	1515.67	0	-5.34	24.86	6927	6927	MS2	0/0	0	0	hela_waters_3.raw
High	A	2	DPAAGHTEESMTDDK	2810	Unambiguous	Proliferation marker protein Ki-67 OS=Homo sapiens OX=9606 GN=MKI67 PE=1 SV=2 - [KI67_HUMAN]	1	1	P46013		HCD	1	0	1	1	0	6.71e-09	15	14	2.2	0	30	60	3400000	2	802.328	1603.65	0	-3.37	24.86	6928	6928	MS2	0/0	0	0	hela_waters_3.raw
High	A	2	RNAAPPPSNTEAPPGETR	2812	Unambiguous	ATP-dependent RNA helicase DDX24 OS=Homo sapiens OX=9606 GN=DDX24 PE=1 SV=1 - [DDX24_HUMAN]	1	1	Q9GZR7		HCD	1	0	1	1	0	9.24e-16	188	192	3.44	1	56	60	3395000	3	621.308	1861.91	0	-2.73	24.86	6929	6929	MS2	0/0	0	0	hela_waters_3.raw
High	A	2	QEEENPAEETGEEK	2814	Unambiguous	Alpha-endosulfine OS=Homo sapiens OX=9606 GN=ENSA PE=1 SV=1 - [ENSA_HUMAN]	1	1	O43768		HCD	1	0	1	1	0	3.1e-15	26	16	3.15	0	17	60	2853000	2	809.837	1618.67	0	-2.49	24.86	6930	6930	MS2	0/0	0	0	hela_waters_3.raw
High	A	2	STSSHGTDEMESSSYR	2816	Unambiguous	PHD finger protein 6 OS=Homo sapiens OX=9606 GN=PHF6 PE=1 SV=1 - [PHF6_HUMAN]	1	1	Q8IWS0		HCD	1	0	1	1	0	5.17e-11	6	15	2.59	0	10	60	2677000	3	587.573	1760.7	0	0.28	24.86	6931	6931	MS2	0/0	0	0	hela_waters_3.raw
High	A	2	EAEDDDTGPEEGSPPK	2823	Unambiguous	Trans-Golgi network integral membrane protein 2 OS=Homo sapiens OX=9606 GN=TGOLN2 PE=1 SV=3 - [TGON2_HUMAN]	1	1	O43493		HCD	1	0	1	1	0	2.9e-14	9	13	2.36	0	0	60	5751000	2	836.843	1672.68	0	-2.17	24.87	6935	6935	MS2	0/0	0	0	hela_waters_3.raw
High	A	2	NKYEDEINK	2829	Unambiguous	Keratin, type II cytoskeletal 8 OS=Homo sapiens OX=9606 GN=KRT8 PE=1 SV=7 - [K2C8_HUMAN]|Keratin, type II cytoskeletal 79 OS=Homo sapiens OX=9606 GN=KRT79 PE=1 SV=2 - [K2C79_HUMAN]	7	1	P05787		HCD	1	0	1	1	0.001	0.0124	124	121	2.46	1	14	12	24550000	2	576.779	1152.55	0	-1.3	24.88	6938	6938	MS2	0/0	0	0	hela_waters_3.raw
High	A	2	cGETGHVAINcSK	2833	Unambiguous	Cellular nucleic acid-binding protein OS=Homo sapiens OX=9606 GN=CNBP PE=1 SV=1 - [CNBP_HUMAN]	1	1	P62633	C1(Carbamidomethyl); C11(Carbamidomethyl)	HCD	1	0	1	1	0	8.72e-05	31	35	2.27	0	23	26	10350000	3	478.214	1432.63	0	-2.95	24.88	6940	6940	MS2	0/0	0	0	hela_waters_3.raw
High	A	2	LESENDEYER	2837	Unambiguous	Pre-mRNA-processing factor 6 OS=Homo sapiens OX=9606 GN=PRPF6 PE=1 SV=1 - [PRP6_HUMAN]	1	1	O94906		HCD	1	0	1	1	0	4.7e-14	28	30	2.63	0	30	39	7990000	2	642.273	1283.54	0	-0.32	24.88	6942	6942	MS2	0/0	0	0	hela_waters_3.raw
High	A	2	AQQQEEQGSVNDVKEEEK	2840	Unambiguous	Ribosomal biogenesis protein LAS1L OS=Homo sapiens OX=9606 GN=LAS1L PE=1 SV=2 - [LAS1L_HUMAN]	1	1	Q9Y4W2		HCD	1	0	1	1	0	1.57e-10	109	116	2.5	1	21	60	5987000	3	692.321	2074.95	0	-1.51	24.89	6944	6944	MS2	0/0	0	0	hela_waters_3.raw
High	A	2	GVTEcYEcHPKPTQR	2844	Unambiguous	SUMO-activating enzyme subunit 2 OS=Homo sapiens OX=9606 GN=UBA2 PE=1 SV=2 - [SAE2_HUMAN]	1	1	Q9UBT2	C5(Carbamidomethyl); C8(Carbamidomethyl)	HCD	1	0	1	1	0	3.45e-08	73	72	2.7	0	51	48	3839000	3	621.282	1861.83	0	-0.94	24.89	6946	6946	MS2	0/0	0	0	hela_waters_3.raw
High	A	2	NKYEDEINK	2829	Unambiguous	Keratin, type II cytoskeletal 8 OS=Homo sapiens OX=9606 GN=KRT8 PE=1 SV=7 - [K2C8_HUMAN]|Keratin, type II cytoskeletal 79 OS=Homo sapiens OX=9606 GN=KRT79 PE=1 SV=2 - [K2C79_HUMAN]	7	1	P05787		HCD	1	0	1	1	0.008	0.0897	126	125	2.06	1	33	40	4538000	3	384.855	1152.55	0	-1.55	24.89	6947	6947	MS2	0/0	0	0	hela_waters_3.raw
High	A	2	KPEDWDERPK	2850	Unambiguous	Calnexin OS=Homo sapiens OX=9606 GN=CANX PE=1 SV=2 - [CALX_HUMAN]	1	1	P27824		HCD	1	0	1	1	0	7.52e-13	140	149	3.22	0	16	60	3306000	3	433.882	1299.63	0	-1.33	24.89	6949	6949	MS2	0/0	0	0	hela_waters_3.raw
High	A	2	SQLGAHHTTPVGDGAAGTR	2782	Unambiguous	Transmembrane protein 41B OS=Homo sapiens OX=9606 GN=TMEM41B PE=1 SV=1 - [TM41B_HUMAN]	1	1	Q5BJD5		HCD	1	0	1	1	0.001	0.00649	182	177	2.69	0	39	60	2492000	4	458.98	1832.9	0	-1.04	24.9	6950	6950	MS2	0/0	0	0	hela_waters_3.raw
High	A	2	EQEAEPEEQEEDSSSDPR	2856	Unambiguous	Microfibrillar-associated protein 1 OS=Homo sapiens OX=9606 GN=MFAP1 PE=1 SV=2 - [MFAP1_HUMAN]	1	1	P55081		HCD	1	0	1	1	0	0.00164	5	3	1.15	0	0	60	2051000	2	1045.92	2090.82	0	-1.41	24.9	6952	6952	MS2	0/0	0	0	hela_waters_3.raw
High	A	2	YYLHDDREGEGSDK	2858	Unambiguous	Thyroid hormone receptor-associated protein 3 OS=Homo sapiens OX=9606 GN=THRAP3 PE=1 SV=2 - [TR150_HUMAN]	1	1	Q9Y2W1		HCD	1	0	1	1	0.002	0.0135	30	30	1.71	1	37	60	2095000	4	421.686	1683.72	0	-2.14	24.9	6953	6953	MS2	0/0	0	0	hela_waters_3.raw
High	A	2	SYSVGASGSSSR	2860	Unambiguous	Cleavage and polyadenylation specificity factor subunit 7 OS=Homo sapiens OX=9606 GN=CPSF7 PE=1 SV=1 - [CPSF7_HUMAN]	1	1	Q8N684		HCD	1	0	1	1	0.002	0.0136	69	71	1.09	0	65	60	1147000	2	572.764	1144.52	0	-2.08	24.9	6954	6954	MS2	0/0	0	0	hela_waters_3.raw
High	A	2	HATAEEVEEEER	2295	Unambiguous	Ribosome biogenesis protein BRX1 homolog OS=Homo sapiens OX=9606 GN=BRIX1 PE=1 SV=2 - [BRX1_HUMAN]	1	1	Q8TDN6		HCD	1	0	1	1	0.002	0.0158	64	69	1.42	0	10	48	9965000	2	714.819	1428.63	0	5.05	24.91	6957	6957	MS2	0/0	0	0	hela_waters_3.raw
High	A	2	DYSDHPSGGSYR	2298	Unambiguous	RNA-binding motif protein, X chromosome OS=Homo sapiens OX=9606 GN=RBMX PE=1 SV=3 - [RBMX_HUMAN]	2	1	P38159		HCD	1	0	1	1	0	0.00287	26	23	1.61	0	52	60	2473000	3	447.521	1340.55	0	-1.26	24.91	6958	6958	MS2	0/0	0	0	hela_waters_3.raw
High	A	2	FQRPGDPQSAQDK	2792	Unambiguous	Splicing factor 1 OS=Homo sapiens OX=9606 GN=SF1 PE=1 SV=4 - [SF01_HUMAN]	1	1	Q15637		HCD	1	0	1	1	0	6.48e-13	146	142	3.78	0	6	41	11130000	2	737.357	1473.71	0	-0.48	24.91	6960	6960	MS2	0/0	0	0	hela_waters_3.raw
High	A	2	SVSGTDVQEEcR	2874	Unambiguous	Nuclear autoantigenic sperm protein OS=Homo sapiens OX=9606 GN=NASP PE=1 SV=2 - [NASP_HUMAN]	1	1	P49321	C11(Carbamidomethyl)	HCD	1	0	1	1	0	2.06e-13	35	37	2.64	0	17	60	7669000	2	683.798	1366.59	0	-1.8	24.92	6962	6962	MS2	0/0	0	0	hela_waters_3.raw
High	A	2	NIDEHANEDVER	2876	Unambiguous	Ras-related protein Rab-10 OS=Homo sapiens OX=9606 GN=RAB10 PE=1 SV=1 - [RAB10_HUMAN]	1	1	P61026		HCD	1	0	1	1	0.002	0.0144	54	55	2.56	0	3	29	7473000	3	480.883	1440.63	0	-0.8	24.92	6963	6963	MS2	0/0	0	0	hela_waters_3.raw
High	A	2	IDGATQSSPAEPK	2878	Unambiguous	Leucine-rich repeat flightless-interacting protein 1 OS=Homo sapiens OX=9606 GN=LRRFIP1 PE=1 SV=2 - [LRRF1_HUMAN]	1	1	Q32MZ4		HCD	1	0	1	1	0	3.23e-14	133	133	2.77	0	24	60	7272000	2	650.822	1300.64	0	-1.32	24.92	6964	6964	MS2	0/0	0	0	hela_waters_3.raw
High	A	2	TTASEPVEQSEATSK	2882	Unambiguous	Pre-mRNA-splicing regulator WTAP OS=Homo sapiens OX=9606 GN=WTAP PE=1 SV=2 - [FL2D_HUMAN]	1	1	Q15007		HCD	1	0	1	1	0	4.21e-16	115	114	2.5	0	36	60	4532000	2	782.87	1564.73	0	-1.05	24.92	6966	6966	MS2	0/0	0	0	hela_waters_3.raw
High	A	2	FTQTSGETTDADKEPAGEDK	2884	Unambiguous	Proliferation marker protein Ki-67 OS=Homo sapiens OX=9606 GN=MKI67 PE=1 SV=2 - [KI67_HUMAN]	1	1	P46013		HCD	1	0	1	1	0	4.21e-16	49	42	3.54	1	8	60	3194000	3	709.649	2126.93	0	-1.84	24.92	6967	6967	MS2	0/0	0	0	hela_waters_3.raw
High	A	2	APSSSSLNSATSSQSK	2886	Unambiguous	DnaJ homolog subfamily C member 21 OS=Homo sapiens OX=9606 GN=DNAJC21 PE=1 SV=2 - [DJC21_HUMAN]	1	1	Q5F1R6		HCD	1	0	1	1	0	2.26e-14	141	140	2.14	0	23	60	2811000	2	769.869	1538.73	0	1.01	24.93	6968	6968	MS2	0/0	0	0	hela_waters_3.raw
High	A	2	GADNDGSGSESGYTTPK	2894	Unambiguous	Nuclear fragile X mental retardation-interacting protein 2 OS=Homo sapiens OX=9606 GN=NUFIP2 PE=1 SV=1 - [NUFP2_HUMAN]	1	1	Q7Z417		HCD	1	0	1	1	0	0.00023	17	21	1.21	0	0	60	1561000	2	821.844	1642.68	0	-0.74	24.93	6972	6972	MS2	0/0	0	0	hela_waters_3.raw
High	A	2	VEYHAGGSTQNSIK	2900	Unambiguous	Adenosine kinase OS=Homo sapiens OX=9606 GN=ADK PE=1 SV=2 - [ADK_HUMAN]	1	1	P55263		HCD	1	0	1	1	0	6.4e-10	169	174	2.33	0	41	43	7708000	3	497.579	1490.72	0	-0.16	24.94	6975	6975	MS2	0/0	0	0	hela_waters_3.raw
High	A	2	ESRPSEEREWDR	2906	Unambiguous	Eukaryotic translation initiation factor 3 subunit A OS=Homo sapiens OX=9606 GN=EIF3A PE=1 SV=1 - [EIF3A_HUMAN]	1	1	Q14152		HCD	1	0	1	1	0.006	0.0672	63	69	2.16	1	69	60	2302000	3	525.909	1575.71	0	-1.67	24.95	6979	6979	MS2	0/0	0	0	hela_waters_3.raw
High	A	2	HPSKPDPSGEcNPDLR	2908	Unambiguous	Histone-binding protein RBBP4 OS=Homo sapiens OX=9606 GN=RBBP4 PE=1 SV=3 - [RBBP4_HUMAN]	1	1	Q09028	C11(Carbamidomethyl)	HCD	1	0	1	1	0	4.21e-16	101	84	3.01	0	28	11	28110000	3	602.611	1805.82	0	-2.51	24.95	6980	6980	MS2	0/0	0	0	hela_waters_3.raw
High	A	2	NIDEHANEDVER	2876	Unambiguous	Ras-related protein Rab-10 OS=Homo sapiens OX=9606 GN=RAB10 PE=1 SV=1 - [RAB10_HUMAN]	1	1	P61026		HCD	1	0	1	1	0	4.21e-16	54	55	2.79	0	5	31	15700000	2	720.821	1440.63	0	-0.84	24.95	6981	6981	MS2	0/0	0	0	hela_waters_3.raw
High	A	2	HRPSEADEEELAR	2912	Unambiguous	AP-3 complex subunit delta-1 OS=Homo sapiens OX=9606 GN=AP3D1 PE=1 SV=1 - [AP3D1_HUMAN]	1	1	O14617		HCD	1	0	1	1	0	4.21e-16	109	125	4.11	0	32	45	6544000	3	513.577	1538.72	0	-1.78	24.95	6982	6982	MS2	0/0	0	0	hela_waters_3.raw
High	A	2	HNSEKPPEPVKPEVK	2872	Unambiguous	Cysteine and histidine-rich domain-containing protein 1 OS=Homo sapiens OX=9606 GN=CHORDC1 PE=1 SV=2 - [CHRD1_HUMAN]	1	1	Q9UHD1		HCD	1	0	1	1	0	8.88e-08	221	237	2.73	0	38	60	5187000	3	572.309	1714.91	0	-0.65	24.95	6984	6984	MS2	0/0	0	0	hela_waters_3.raw
High	A	2	EEPKEEEMTEEEK	2920	Unambiguous	Transcription elongation regulator 1 OS=Homo sapiens OX=9606 GN=TCERG1 PE=1 SV=2 - [TCRG1_HUMAN]	1	1	O14776		HCD	1	0	1	1	0	5.87e-08	33	26	2.47	1	0	60	3879000	2	818.851	1636.69	0	3.11	24.96	6987	6987	MS2	0/0	0	0	hela_waters_3.raw
High	A	2	TPSPAAEDAREPEAK	2922	Unambiguous	Symplekin OS=Homo sapiens OX=9606 GN=SYMPK PE=1 SV=2 - [SYMPK_HUMAN]	1	1	Q92797		HCD	1	0	1	1	0	0.000373	147	136	2.74	1	10	60	2016000	3	523.589	1568.75	0	-1.3	24.96	6988	6988	MS2	0/0	0	0	hela_waters_3.raw
High	A	2	DLEADEEDTRK	2924	Unambiguous	Eukaryotic translation initiation factor 2 subunit 2 OS=Homo sapiens OX=9606 GN=EIF2S2 PE=1 SV=2 - [IF2B_HUMAN]	1	1	P20042		HCD	1	0	1	1	0.003	0.0445	62	61	1.53	1	35	60	1942000	3	440.868	1320.59	0	-1.98	24.96	6989	6989	MS2	0/0	0	0	hela_waters_3.raw
High	A	2	QVHPDTGISSK	2339	Unambiguous	Histone H2B type 1-J OS=Homo sapiens OX=9606 GN=HIST1H2BJ PE=1 SV=3 - [H2B1J_HUMAN]|Histone H2B type 1-K OS=Homo sapiens OX=9606 GN=HIST1H2BK PE=1 SV=3 - [H2B1K_HUMAN]	15	2	P06899;O60814		HCD	1	0	1	1	0	0.000407	153	143	1.92	0	6	60	1339000	3	390.203	1168.59	0	-1.24	24.96	6990	6990	MS2	0/0	0	0	hela_waters_3.raw
High	A	2	IAMENDDGRTEEEK	2928	Unambiguous	Ataxin-2-like protein OS=Homo sapiens OX=9606 GN=ATXN2L PE=1 SV=2 - [ATX2L_HUMAN]	1	1	Q8WWM7		HCD	1	0	1	1	0	6.39e-05	55	54	1.69	1	65	14	14010000	3	546.245	1636.72	0	5.49	24.96	6991	6991	MS2	0/0	0	0	hela_waters_3.raw
High	A	2	EVKPEETTcSEHcLQK	2930	Unambiguous	Mitochondrial import inner membrane translocase subunit Tim9 OS=Homo sapiens OX=9606 GN=TIMM9 PE=1 SV=1 - [TIM9_HUMAN]	1	1	Q9Y5J7	C9(Carbamidomethyl); C13(Carbamidomethyl)	HCD	1	0	1	1	0	4.21e-16	66	72	3.76	0	44	60	7477000	3	658.966	1974.88	0	-2.66	24.96	6992	6992	MS2	0/0	0	0	hela_waters_3.raw
High	A	2	cHTTHSMALIHNR	2932	Unambiguous	DNA replication licensing factor MCM4 OS=Homo sapiens OX=9606 GN=MCM4 PE=1 SV=5 - [MCM4_HUMAN]	1	1	P33991	C1(Carbamidomethyl)	HCD	1	0	1	1	0	1.07e-07	122	123	1.52	0	27	57	4519000	4	395.19	1577.74	0	-2.15	24.97	6993	6993	MS2	0/0	0	0	hela_waters_3.raw
High	A	2	SMGSQEDDSGNKPSSYS	2936	Unambiguous	COP9 signalosome complex subunit 3 OS=Homo sapiens OX=9606 GN=COPS3 PE=1 SV=3 - [CSN3_HUMAN]	1	1	Q9UNS2		HCD	1	0	1	1	0	1.59e-08	7	10	2.12	0	13	60	3824000	2	888.354	1775.7	0	-0.6	24.97	6995	6995	MS2	0/0	0	0	hela_waters_3.raw
High	A	2	STSSHGTDEMESSSYR	2816	Unambiguous	PHD finger protein 6 OS=Homo sapiens OX=9606 GN=PHF6 PE=1 SV=1 - [PHF6_HUMAN]	1	1	Q8IWS0		HCD	1	0	1	1	0	2.59e-06	6	14	1.74	0	0	60	1948000	2	880.854	1760.7	0	-1.62	24.98	6999	6999	MS2	0/0	0	0	hela_waters_3.raw
High	A	2	DLEADEEDTRK	2924	Unambiguous	Eukaryotic translation initiation factor 2 subunit 2 OS=Homo sapiens OX=9606 GN=EIF2S2 PE=1 SV=2 - [IF2B_HUMAN]	1	1	P20042		HCD	1	0	1	1	0	1.38e-06	71	72	2.13	1	36	60	2840000	2	660.799	1320.59	0	-0.72	24.98	7000	7000	MS2	0/0	0	0	hela_waters_3.raw
High	A	2	VAPAQPSEEGPGR	2946	Unambiguous	Eukaryotic translation initiation factor 4B OS=Homo sapiens OX=9606 GN=EIF4B PE=1 SV=2 - [IF4B_HUMAN]	1	1	P23588		HCD	1	0	1	1	0	4.77e-13	189	211	2.36	0	11	21	19350000	2	647.823	1294.64	0	-0.63	24.98	7001	7001	MS2	0/0	0	0	hela_waters_3.raw
High	A	2	LEDNPSSGSPPR	2952	Unambiguous	CTD small phosphatase-like protein 2 OS=Homo sapiens OX=9606 GN=CTDSPL2 PE=1 SV=2 - [CTSL2_HUMAN]	1	1	Q05D32		HCD	1	0	1	1	0	1.54e-13	110	100	2.55	0	45	60	5228000	2	628.298	1255.59	0	-1.48	24.99	7004	7004	MS2	0/0	0	0	hela_waters_3.raw
High	A	2	EVKPEETTcSEHcLQK	2930	Unambiguous	Mitochondrial import inner membrane translocase subunit Tim9 OS=Homo sapiens OX=9606 GN=TIMM9 PE=1 SV=1 - [TIM9_HUMAN]	1	1	Q9Y5J7	C9(Carbamidomethyl); C13(Carbamidomethyl)	HCD	1	0	1	1	0	6.31e-08	76	76	2.54	0	9	30	8223000	4	494.478	1974.89	0	-0.29	24.99	7009	7009	MS2	0/0	0	0	hela_waters_3.raw
High	A	2	HPSKPDPSGEcNPDLR	2908	Unambiguous	Histone-binding protein RBBP4 OS=Homo sapiens OX=9606 GN=RBBP4 PE=1 SV=3 - [RBBP4_HUMAN]	1	1	Q09028	C11(Carbamidomethyl)	HCD	1	0	1	1	0	4.32e-13	120	110	1.94	0	0	60	3636000	2	903.416	1805.83	0	1.11	25	7011	7011	MS2	0/0	0	0	hela_waters_3.raw
High	A	2	HHPEDVEPALRK	2974	Unambiguous	Alcohol dehydrogenase [NADP(+)] OS=Homo sapiens OX=9606 GN=AKR1A1 PE=1 SV=3 - [AK1A1_HUMAN]	1	1	P14550		HCD	1	0	1	1	0	2.61e-07	170	168	2.19	1	19	60	1623000	4	357.69	1427.74	0	-0.87	25	7015	7015	MS2	0/0	0	0	hela_waters_3.raw
High	A	2	VAAASGHcGAFSGSDSSR	2976	Unambiguous	Constitutive coactivator of PPAR-gamma-like protein 1 OS=Homo sapiens OX=9606 GN=FAM120A PE=1 SV=2 - [F120A_HUMAN]	1	1	Q9NZB2	C8(Carbamidomethyl)	HCD	1	0	1	1	0	5.87e-05	41	35	1.71	0	0	60	2023000	2	862.374	1723.74	0	-2.94	25	7016	7016	MS2	0/0	0	0	hela_waters_3.raw
High	A	2	DSDGDGIGDAcDNcPQK	2982	Unambiguous	Cartilage oligomeric matrix protein OS=Homo sapiens OX=9606 GN=COMP PE=1 SV=2 - [COMP_HUMAN]	1	1	P49747	C11(Carbamidomethyl); C14(Carbamidomethyl)	HCD	1	0	1	1	0	1.88e-05	4	3	1.55	0	0	60	1833000	2	912.342	1823.68	0	-2.58	25.01	7020	7020	MS2	0/0	0	0	hela_waters_3.raw
High	A	2	IHEGcEEPATHNALAK	2984	Unambiguous	Clathrin heavy chain 1 OS=Homo sapiens OX=9606 GN=CLTC PE=1 SV=5 - [CLH1_HUMAN]	1	1	Q00610	C5(Carbamidomethyl)	HCD	1	0	1	1	0	5.66e-16	152	151	3.14	0	17	10	26630000	3	592.95	1776.83	0	0.53	25.02	7022	7022	MS2	0/0	0	0	hela_waters_3.raw
High	A	2	EEDcHSPTSKPPKPDQPLK	2986	Unambiguous	Eukaryotic translation initiation factor 4B OS=Homo sapiens OX=9606 GN=EIF4B PE=1 SV=2 - [IF4B_HUMAN]	1	1	P23588	C4(Carbamidomethyl)	HCD	1	0	1	1	0.003	0.0382	165	160	1.81	0	3	21	12630000	4	548.267	2190.05	0	-0.76	25.02	7023	7023	MS2	0/0	0	0	hela_waters_3.raw
High	A	2	VEAKPEVQSQPPR	2988	Unambiguous	Ras GTPase-activating protein-binding protein 2 OS=Homo sapiens OX=9606 GN=G3BP2 PE=1 SV=2 - [G3BP2_HUMAN]	1	1	Q9UN86		HCD	1	0	1	1	0	3.65e-12	209	195	2.66	0	13	28	11370000	3	488.931	1464.78	0	-0.71	25.02	7024	7024	MS2	0/0	0	0	hela_waters_3.raw
High	A	2	TEAPAAPAAQETK	2993	Unambiguous	Brain acid soluble protein 1 OS=Homo sapiens OX=9606 GN=BASP1 PE=1 SV=2 - [BASP1_HUMAN]	1	1	P80723		HCD	1	0	1	1	0	1.79e-12	147	156	2.22	0	48	18	10550000	2	642.824	1284.64	0	-1.5	25.02	7026	7026	MS2	0/0	0	0	hela_waters_3.raw
High	A	2	EEDcHSPTSKPPKPDQPLK	2986	Unambiguous	Eukaryotic translation initiation factor 4B OS=Homo sapiens OX=9606 GN=EIF4B PE=1 SV=2 - [IF4B_HUMAN]	1	1	P23588	C4(Carbamidomethyl)	HCD	1	0	1	1	0.001	0.0125	165	160	3.08	0	15	60	4183000	3	730.688	2190.05	0	-0.78	25.02	7027	7027	MS2	0/0	0	0	hela_waters_3.raw
High	A	2	SYcNDQSTGDIK	2997	Unambiguous	Hypoxanthine-guanine phosphoribosyltransferase OS=Homo sapiens OX=9606 GN=HPRT1 PE=1 SV=2 - [HPRT_HUMAN]	1	1	P00492	C3(Carbamidomethyl)	HCD	1	0	1	1	0	8.05e-12	28	30	2.26	0	11	60	4813000	2	694.294	1387.58	0	1.44	25.02	7028	7028	MS2	0/0	0	0	hela_waters_3.raw
High	A	2	SPGSTPTTPTSSQAPQK	2999	Unambiguous	Nuclear pore complex protein Nup214 OS=Homo sapiens OX=9606 GN=NUP214 PE=1 SV=2 - [NU214_HUMAN]	1	1	P35658		HCD	1	0	1	1	0	0.00119	193	187	1.77	0	29	60	4736000	2	836.412	1671.82	0	-0.85	25.03	7029	7029	MS2	0/0	0	0	hela_waters_3.raw
High	A	2	YYLHDDREGEGSDK	2858	Unambiguous	Thyroid hormone receptor-associated protein 3 OS=Homo sapiens OX=9606 GN=THRAP3 PE=1 SV=2 - [TR150_HUMAN]	1	1	Q9Y2W1		HCD	1	0	1	1	0.002	0.0154	32	31	1.43	1	19	60	4690000	3	561.913	1683.72	0	0.19	25.03	7030	7030	MS2	0/0	0	0	hela_waters_3.raw
High	A	2	AAPTAASDQPDSAATTEK	3005	Unambiguous	Partner of Y14 and mago OS=Homo sapiens OX=9606 GN=PYM1 PE=1 SV=1 - [PYM1_HUMAN]	1	1	Q9BRP8		HCD	1	0	1	1	0	4.21e-16	113	98	3.98	0	12	60	5874000	2	866.403	1731.8	0	-2.6	25.03	7033	7033	MS2	0/0	0	0	hela_waters_3.raw
High	A	2	GYHQYAYDGK	3009	Unambiguous	HLA class I histocompatibility antigen, A-69 alpha chain OS=Homo sapiens OX=9606 GN=HLA-A PE=1 SV=2 - [1A69_HUMAN]|HLA class I histocompatibility antigen, A-24 alpha chain OS=Homo sapiens OX=9606 GN=HLA-A PE=1 SV=2 - [1A24_HUMAN]	4	1	P10316		HCD	1	0	1	1	0.005	0.0601	40	42	1.7	0	27	60	1932000	3	401.18	1201.52	0	-2.37	25.04	7035	7035	MS2	0/0	0	0	hela_waters_3.raw
High	A	2	SDAEEDGGTVSQEEEDRKPK	2444	Unambiguous	Calnexin OS=Homo sapiens OX=9606 GN=CANX PE=1 SV=2 - [CALX_HUMAN]	1	1	P27824		HCD	1	0	1	1	0	3.18e-05	58	62	1.74	1	84	60	1728000	4	552.249	2205.97	0	-0.91	25.05	7040	7040	MS2	0/0	0	0	hela_waters_3.raw
High	A	2	NEENTEPGAESSENADDPNK	2436	Unambiguous	Matrin-3 OS=Homo sapiens OX=9606 GN=MATR3 PE=1 SV=2 - [MATR3_HUMAN]	1	1	P43243		HCD	1	0	1	1	0	5.16e-15	15	13	1.92	0	0	60	2582000	2	1073.94	2146.87	0	2.56	25.05	7041	7041	MS2	0/0	0	0	hela_waters_3.raw
High	A	2	KNHEEEMNALR	3025	Unambiguous	Keratin, type I cytoskeletal 17 OS=Homo sapiens OX=9606 GN=KRT17 PE=1 SV=2 - [K1C17_HUMAN]	2	1	Q04695		HCD	1	0	1	1	0.005	0.0573	96	100	2.36	1	18	12	20790000	3	457.554	1370.65	0	-0.17	25.05	7044	7044	MS2	0/0	0	0	hela_waters_3.raw
High	A	2	LEVQATDREENK	3004	Unambiguous	DNA topoisomerase 1 OS=Homo sapiens OX=9606 GN=TOP1 PE=1 SV=2 - [TOP1_HUMAN]	1	1	P11387		HCD	1	0	1	1	0.001	0.00593	194	187	2.14	1	46	60	8190000	2	716.357	1431.71	0	-0.2	25.06	7046	7046	MS2	0/0	0	0	hela_waters_3.raw
High	A	2	IHEGcEEPATHNALAK	2984	Unambiguous	Clathrin heavy chain 1 OS=Homo sapiens OX=9606 GN=CLTC PE=1 SV=5 - [CLH1_HUMAN]	1	1	Q00610	C5(Carbamidomethyl)	HCD	1	0	1	1	0	2.34e-13	154	146	2.57	0	22	60	6666000	2	888.919	1776.83	0	-1.11	25.06	7047	7047	MS2	0/0	0	0	hela_waters_3.raw
High	A	2	EYNEDEDPAAR	3033	Unambiguous	Protein Red OS=Homo sapiens OX=9606 GN=IK PE=1 SV=3 - [RED_HUMAN]	1	1	Q13123		HCD	1	0	1	1	0	6.93e-12	17	18	2.43	0	55	60	5343000	2	654.77	1308.53	0	-0.42	25.06	7048	7048	MS2	0/0	0	0	hela_waters_3.raw
High	A	2	EcNPPNSQPASYQR	3035	Unambiguous	Peptidyl-prolyl cis-trans isomerase G OS=Homo sapiens OX=9606 GN=PPIG PE=1 SV=2 - [PPIG_HUMAN]	1	1	Q13427	C2(Carbamidomethyl)	HCD	1	0	1	1	0	3.31e-13	37	44	2.19	0	31	60	4842000	2	824.359	1647.71	0	-4.51	25.06	7049	7049	MS2	0/0	0	0	hela_waters_3.raw
High	A	2	QAVEQQIQSHR	3041	Unambiguous	Kinesin-1 heavy chain OS=Homo sapiens OX=9606 GN=KIF5B PE=1 SV=1 - [KINH_HUMAN]	1	1	P33176		HCD	1	0	1	1	0	6.26e-15	207	226	3.02	0	22	60	2547000	2	662.343	1323.68	0	1.02	25.06	7052	7052	MS2	0/0	0	0	hela_waters_3.raw
High	A	2	AASVHTVGEDTEETPHR	3047	Unambiguous	Ribonucleases P/MRP protein subunit POP1 OS=Homo sapiens OX=9606 GN=POP1 PE=1 SV=2 - [POP1_HUMAN]	1	1	Q99575		HCD	1	0	1	1	0	1.64e-06	136	141	2.58	0	62	60	4441000	3	612.621	1835.85	0	-1.74	25.07	7055	7055	MS2	0/0	0	0	hela_waters_3.raw
High	A	2	EVVEEAENGR	3057	Unambiguous	Prothymosin alpha OS=Homo sapiens OX=9606 GN=PTMA PE=1 SV=2 - [PTMA_HUMAN]	1	1	P06454		HCD	1	0	1	1	0	1.82e-10	79	86	2.52	0	1	1	260000000	2	566.267	1131.53	0	-0.29	25.08	7061	7061	MS2	0/0	0	0	hela_waters_3.raw
High	A	2	EGIPPDQQR	2479	Unambiguous	Ubiquitin-40S ribosomal protein S27a OS=Homo sapiens OX=9606 GN=RPS27A PE=1 SV=2 - [RS27A_HUMAN]	4	1	P62979		HCD	1	0	1	1	0	0.000446	190	185	1.87	0	19	8	35690000	2	520.262	1039.52	0	-0.92	25.08	7062	7062	MS2	0/0	0	0	hela_waters_3.raw
High	A	2	LEScGVTSDNcR	3061	Unambiguous	Ribonuclease inhibitor OS=Homo sapiens OX=9606 GN=RNH1 PE=1 SV=2 - [RINI_HUMAN]	1	1	P13489	C4(Carbamidomethyl); C11(Carbamidomethyl)	HCD	1	0	1	1	0	4.21e-16	22	20	3.04	0	9	40	16580000	2	699.292	1397.58	0	-1.42	25.08	7063	7063	MS2	0/0	0	0	hela_waters_3.raw
High	A	2	TYGEPESAGPSR	3065	Unambiguous	Emerin OS=Homo sapiens OX=9606 GN=EMD PE=1 SV=1 - [EMD_HUMAN]	1	1	P50402		HCD	1	0	1	1	0	3.25e-12	85	96	2.52	0	22	18	23900000	2	625.786	1250.56	0	-0.84	25.09	7065	7065	MS2	0/0	0	0	hela_waters_3.raw
High	A	2	EEDPATGTGDPPR	3069	Unambiguous	Ubiquitin carboxyl-terminal hydrolase 5 OS=Homo sapiens OX=9606 GN=USP5 PE=1 SV=2 - [UBP5_HUMAN]	1	1	P45974		HCD	1	0	1	1	0	3.57e-13	53	62	2.46	0	31	31	14940000	2	671.299	1341.59	0	-0.87	25.09	7067	7067	MS2	0/0	0	0	hela_waters_3.raw
High	A	2	AGQSAAGAAPGGGVDTR	3075	Unambiguous	Filamin-A OS=Homo sapiens OX=9606 GN=FLNA PE=1 SV=4 - [FLNA_HUMAN]	1	1	P21333		HCD	1	0	1	1	0	5.06e-15	152	125	3.21	0	45	33	11400000	2	721.852	1442.7	0	-1.22	25.09	7070	7070	MS2	0/0	0	0	hela_waters_3.raw
High	A	2	TQYScYccK	3077	Unambiguous	Testin OS=Homo sapiens OX=9606 GN=TES PE=1 SV=1 - [TES_HUMAN]	1	1	Q9UGI8	C5(Carbamidomethyl); C7(Carbamidomethyl); C8(Carbamidomethyl)	HCD	1	0	1	1	0	6.36e-05	4	5	2.13	0	60	60	5554000	2	635.238	1269.47	0	-1.19	25.09	7071	7071	MS2	0/0	0	0	hela_waters_3.raw
High	A	2	LGIHEDSTNR	3082	Unambiguous	Heat shock protein HSP 90-beta OS=Homo sapiens OX=9606 GN=HSP90AB1 PE=1 SV=4 - [HS90B_HUMAN]	1	1	P08238		HCD	1	0	1	1	0.007	0.0777	152	136	1.26	0	32	60	4635000	2	571.283	1141.56	0	-0.47	25.1	7073	7073	MS2	0/0	0	0	hela_waters_3.raw
High	A	2	LGIHEDSTNR	3082	Unambiguous	Heat shock protein HSP 90-beta OS=Homo sapiens OX=9606 GN=HSP90AB1 PE=1 SV=4 - [HS90B_HUMAN]	1	1	P08238		HCD	1	0	1	1	0	9.32e-05	152	136	1.85	0	20	60	3682000	3	381.191	1141.56	0	-0.97	25.1	7074	7074	MS2	0/0	0	0	hela_waters_3.raw
High	A	2	QVHPDTGISSK	2339	Unambiguous	Histone H2B type 1-J OS=Homo sapiens OX=9606 GN=HIST1H2BJ PE=1 SV=3 - [H2B1J_HUMAN]|Histone H2B type 1-K OS=Homo sapiens OX=9606 GN=HIST1H2BK PE=1 SV=3 - [H2B1K_HUMAN]	15	2	P06899;O60814		HCD	1	0	1	1	0.002	0.0145	153	143	1.93	0	50	60	2474000	2	584.801	1168.59	0	-0.91	25.11	7080	7080	MS2	0/0	0	0	hela_waters_3.raw
High	A	2	RQLEEAEEEAQR	3098	Unambiguous	Myosin-9 OS=Homo sapiens OX=9606 GN=MYH9 PE=1 SV=4 - [MYH9_HUMAN]	1	1	P35579		HCD	1	0	1	1	0	1.2e-09	126	120	3.6	1	13	16	16740000	3	496.574	1487.71	0	0.01	25.11	7082	7082	MS2	0/0	0	0	hela_waters_3.raw
High	A	2	DREEDEEDAYER	3102	Unambiguous	RNA-binding protein 25 OS=Homo sapiens OX=9606 GN=RBM25 PE=1 SV=3 - [RBM25_HUMAN]	1	1	P49756		HCD	1	0	1	1	0	4.52e-09	7	9	2.3	1	41	60	1957000	2	778.311	1555.61	0	-0.04	25.12	7084	7084	MS2	0/0	0	0	hela_waters_3.raw
High	A	2	DSYESYGNSR	3106	Unambiguous	RNA-binding motif protein, X chromosome OS=Homo sapiens OX=9606 GN=RBMX PE=1 SV=3 - [RBMX_HUMAN]	2	1	P38159		HCD	1	0	1	1	0	1.88e-08	17	18	1.95	0	14	24	15510000	2	589.242	1177.48	0	0.41	25.12	7086	7086	MS2	0/0	0	0	hela_waters_3.raw
High	A	2	GPAAAQGSAAAPAEPK	3108	Unambiguous	Ubiquilin-2 OS=Homo sapiens OX=9606 GN=UBQLN2 PE=1 SV=2 - [UBQL2_HUMAN]	1	1	Q9UHD9		HCD	1	0	1	1	0	1.2e-15	221	225	3.12	0	15	25	15010000	2	697.356	1393.71	0	-1.07	25.12	7087	7087	MS2	0/0	0	0	hela_waters_3.raw
High	A	2	IEGDPQGVQQAK	3110	Unambiguous	Vigilin OS=Homo sapiens OX=9606 GN=HDLBP PE=1 SV=2 - [VIGLN_HUMAN]	1	1	Q00341		HCD	1	0	1	1	0	6.52e-12	146	151	2.12	0	50	31	9510000	2	635.324	1269.64	0	-2.26	25.12	7088	7088	MS2	0/0	0	0	hela_waters_3.raw
High	A	2	EDSQRPGAHLTVK	3023	Unambiguous	Heterogeneous nuclear ribonucleoprotein A1 OS=Homo sapiens OX=9606 GN=HNRNPA1 PE=1 SV=5 - [ROA1_HUMAN]	2	1	P09651		HCD	1	0	1	1	0.001	0.00922	214	201	2.06	0	36	60	8242000	2	719.375	1437.74	0	-0.75	25.13	7090	7090	MS2	0/0	0	0	hela_waters_3.raw
High	A	2	SSSSSAASDTATSTQRPLR	3118	Unambiguous	RNA-binding protein 15 OS=Homo sapiens OX=9606 GN=RBM15 PE=1 SV=2 - [RBM15_HUMAN]	1	1	Q96T37		HCD	1	0	1	1	0	0.000132	157	172	3.06	0	0	60	5024000	3	637.311	1909.92	0	-1.31	25.13	7092	7092	MS2	0/0	0	0	hela_waters_3.raw
High	A	2	THLSLSHNPEQK	3130	Unambiguous	C-1-tetrahydrofolate synthase, cytoplasmic OS=Homo sapiens OX=9606 GN=MTHFD1 PE=1 SV=3 - [C1TC_HUMAN]	1	1	P11586		HCD	1	0	1	1	0.001	0.0125	244	255	1.81	0	57	60	3016000	3	464.241	1390.71	0	1.35	25.14	7098	7098	MS2	0/0	0	0	hela_waters_3.raw
High	A	2	GDQccYSHSPPTPR	3132	Unambiguous	tRNA (guanine(26)-N(2))-dimethyltransferase OS=Homo sapiens OX=9606 GN=TRMT1 PE=1 SV=1 - [TRM1_HUMAN]	1	1	Q9NXH9	C4(Carbamidomethyl); C5(Carbamidomethyl)	HCD	1	0	1	1	0	0.00288	15	19	1.93	0	30	60	2255000	3	554.564	1661.68	0	-1	25.14	7099	7099	MS2	0/0	0	0	hela_waters_3.raw
High	A	2	TQASSSFQDSSQPAGK	3146	Unambiguous	Probable 28S rRNA (cytosine(4447)-C(5))-methyltransferase OS=Homo sapiens OX=9606 GN=NOP2 PE=1 SV=2 - [NOP2_HUMAN]	1	1	P46087		HCD	1	0	1	1	0	4.21e-16	84	101	3.04	0	0	55	15470000	2	813.373	1625.74	0	-0.42	25.15	7107	7107	MS2	0/0	0	0	hela_waters_3.raw
High	A	2	VTHETSAHEGQTEAPSIDEK	3148	Unambiguous	Ubiquitin carboxyl-terminal hydrolase isozyme L3 OS=Homo sapiens OX=9606 GN=UCHL3 PE=1 SV=1 - [UCHL3_HUMAN]	1	1	P15374		HCD	1	0	1	1	0	1.78e-08	105	101	2.94	0	16	17	10790000	4	542.254	2165.99	0	-0.16	25.16	7108	7108	MS2	0/0	0	0	hela_waters_3.raw
High	A	2	VPASQPRPESKPESQIPPQRPQR	3152	Unambiguous	Ras GTPase-activating protein-binding protein 1 OS=Homo sapiens OX=9606 GN=G3BP1 PE=1 SV=1 - [G3BP1_HUMAN]	1	1	Q13283		HCD	1	0	1	1	0	1.84e-09	130	133	2.79	0	16	60	8729000	5	522.684	2609.39	0	-0.38	25.16	7110	7110	MS2	0/0	0	0	hela_waters_3.raw
High	A	2	GSGTAEVELKK	3154	Unambiguous	Pyruvate kinase PKM OS=Homo sapiens OX=9606 GN=PKM PE=1 SV=4 - [KPYM_HUMAN]	1	1	P14618		HCD	1	0	1	1	0	0.000135	239	218	2.06	1	37	44	7709000	2	559.807	1118.61	0	0.57	25.16	7111	7111	MS2	0/0	0	0	hela_waters_3.raw
High	A	2	EVYQQQQYGSGGR	3156	Unambiguous	Heterogeneous nuclear ribonucleoprotein A/B OS=Homo sapiens OX=9606 GN=HNRNPAB PE=1 SV=2 - [ROAA_HUMAN]	1	1	Q99729		HCD	1	0	1	1	0	1.82e-14	99	103	2.55	0	23	60	6999000	2	750.348	1499.69	0	0.6	25.16	7112	7112	MS2	0/0	0	0	hela_waters_3.raw
High	A	2	TPHYGSQTPLHDGSR	3158	Unambiguous	Transcription elongation factor SPT5 OS=Homo sapiens OX=9606 GN=SUPT5H PE=1 SV=1 - [SPT5H_HUMAN]	1	1	O00267		HCD	1	0	1	1	0	2.97e-05	176	154	2.91	0	24	54	6571000	3	551.597	1652.78	0	-0.5	25.16	7113	7113	MS2	0/0	0	0	hela_waters_3.raw
High	A	2	VDcTAHSDVcSAQGVR	3160	Unambiguous	Thioredoxin domain-containing protein 5 OS=Homo sapiens OX=9606 GN=TXNDC5 PE=1 SV=2 - [TXND5_HUMAN]	1	1	Q8NBS9	C3(Carbamidomethyl); C10(Carbamidomethyl)	HCD	1	0	1	1	0	4.21e-16	44	40	3.63	0	8	60	6020000	2	881.387	1761.77	0	1.02	25.16	7114	7114	MS2	0/0	0	0	hela_waters_3.raw
High	A	2	AGAAGGPEEEAEKPVK	3162	Unambiguous	PEST proteolytic signal-containing nuclear protein OS=Homo sapiens OX=9606 GN=PCNP PE=1 SV=2 - [PCNP_HUMAN]	1	1	Q8WW12		HCD	1	0	1	1	0	0.00146	167	158	2.04	0	32	60	4940000	2	770.388	1539.77	0	1.92	25.17	7115	7115	MS2	0/0	0	0	hela_waters_3.raw
High	A	2	QLHQScQTDDGEDDLK	3168	Unambiguous	COP9 signalosome complex subunit 2 OS=Homo sapiens OX=9606 GN=COPS2 PE=1 SV=1 - [CSN2_HUMAN]	1	1	P61201	C6(Carbamidomethyl)	HCD	1	0	1	1	0.001	0.00809	26	45	1.18	0	0	60	1748000	2	944.901	1888.8	0	-1.32	25.17	7118	7118	MS2	0/0	0	0	hela_waters_3.raw
High	A	2	VTHETSAHEGQTEAPSIDEK	3148	Unambiguous	Ubiquitin carboxyl-terminal hydrolase isozyme L3 OS=Homo sapiens OX=9606 GN=UCHL3 PE=1 SV=1 - [UCHL3_HUMAN]	1	1	P15374		HCD	1	0	1	1	0	4.21e-16	105	102	3.87	0	5	55	13720000	3	722.669	2165.99	0	-0.32	25.17	7121	7121	MS2	0/0	0	0	hela_waters_3.raw
High	A	2	cEMEQQNQEYK	1921	Unambiguous	Keratin, type I cytoskeletal 17 OS=Homo sapiens OX=9606 GN=KRT17 PE=1 SV=2 - [K1C17_HUMAN]	2	1	Q04695	C1(Carbamidomethyl)	HCD	1	0	1	1	0	4.21e-16	11	20	2.92	0	11	9	52560000	2	743.8	1486.59	0	-0.96	25.18	7124	7124	MS2	0/0	0	0	hela_waters_3.raw
High	A	2	ETPAATEAPSSTPK	3188	Unambiguous	Brain acid soluble protein 1 OS=Homo sapiens OX=9606 GN=BASP1 PE=1 SV=2 - [BASP1_HUMAN]	1	1	P80723		HCD	1	0	1	1	0	4.21e-16	151	149	2.9	0	50	16	20780000	2	693.841	1386.67	0	-0.39	25.19	7129	7129	MS2	0/0	0	0	hela_waters_3.raw
High	A	2	YSGSEGSTQTLTK	3190	Unambiguous	Protein S100-P OS=Homo sapiens OX=9606 GN=S100P PE=1 SV=2 - [S100P_HUMAN]	1	1	P25815		HCD	1	0	1	1	0	4.21e-16	126	131	3.17	0	16	60	12200000	2	679.825	1358.64	0	-0.52	25.19	7130	7130	MS2	0/0	0	0	hela_waters_3.raw
High	A	2	VPASQPRPESKPESQIPPQRPQR	3152	Unambiguous	Ras GTPase-activating protein-binding protein 1 OS=Homo sapiens OX=9606 GN=G3BP1 PE=1 SV=1 - [G3BP1_HUMAN]	1	1	Q13283		HCD	1	0	1	1	0.002	0.0212	126	129	2.88	0	12	60	8584000	4	653.103	2609.39	0	0.37	25.19	7131	7131	MS2	0/0	0	0	hela_waters_3.raw
High	A	2	AGAAGGPEEEAEKPVK	3162	Unambiguous	PEST proteolytic signal-containing nuclear protein OS=Homo sapiens OX=9606 GN=PCNP PE=1 SV=2 - [PCNP_HUMAN]	1	1	Q8WW12		HCD	1	0	1	1	0.002	0.0137	185	174	3.04	0	29	29	8392000	3	513.928	1539.77	0	3.06	25.2	7133	7133	MS2	0/0	0	0	hela_waters_3.raw
High	A	2	RELHGQNPVVTPcNK	3198	Unambiguous	Cleavage and polyadenylation specificity factor subunit 6 OS=Homo sapiens OX=9606 GN=CPSF6 PE=1 SV=2 - [CPSF6_HUMAN]	1	1	Q16630	C13(Carbamidomethyl)	HCD	1	0	1	1	0	5.7e-14	205	219	3.86	1	39	60	7798000	3	583.633	1748.89	0	-0.55	25.2	7134	7134	MS2	0/0	0	0	hela_waters_3.raw
High	A	2	TPHYGSQTPLHDGSR	3158	Unambiguous	Transcription elongation factor SPT5 OS=Homo sapiens OX=9606 GN=SUPT5H PE=1 SV=1 - [SPT5H_HUMAN]	1	1	O00267		HCD	1	0	1	1	0	0.00136	176	154	1.63	0	14	60	3427000	4	413.95	1652.78	0	-0.29	25.2	7136	7136	MS2	0/0	0	0	hela_waters_3.raw
High	A	2	EIQTAVR	3204	Unambiguous	Histone H2B type 1-J OS=Homo sapiens OX=9606 GN=HIST1H2BJ PE=1 SV=3 - [H2B1J_HUMAN]|Histone H2B type 1-K OS=Homo sapiens OX=9606 GN=HIST1H2BK PE=1 SV=3 - [H2B1K_HUMAN]	14	2	P06899;O60814		HCD	1	0	1	1	0.007	0.0769	237	216	1.72	0	32	60	3423000	2	408.732	816.457	0	-1.1	25.2	7137	7137	MS2	0/0	0	0	hela_waters_3.raw
Middle	A	2	VHVPARPYR	3210	Unambiguous	Proliferation marker protein Ki-67 OS=Homo sapiens OX=9606 GN=MKI67 PE=1 SV=2 - [KI67_HUMAN]	1	1	P46013		HCD	1	0	1	1	0.032	0.416	118	112	1.79	0	21	60	2275000	3	365.545	1094.62	0	-0.12	25.21	7140	7140	MS2	0/0	0	0	hela_waters_3.raw
High	A	2	HSQYHVDGSLEK	3212	Unambiguous	Serine/threonine-protein phosphatase PGAM5, mitochondrial OS=Homo sapiens OX=9606 GN=PGAM5 PE=1 SV=2 - [PGAM5_HUMAN]	1	1	Q96HS1		HCD	1	0	1	1	0	1.91e-08	110	101	2.9	0	26	54	6407000	3	467.225	1399.66	0	-0.13	25.21	7141	7141	MS2	0/0	0	0	hela_waters_3.raw
High	A	2	QSNASSDVEVEEK	3214	Unambiguous	PC4 and SFRS1-interacting protein OS=Homo sapiens OX=9606 GN=PSIP1 PE=1 SV=1 - [PSIP1_HUMAN]	1	1	O75475		HCD	1	0	1	1	0	3.13e-12	80	66	2.4	0	17	60	2986000	2	711.321	1421.63	0	-2.94	25.21	7142	7142	MS2	0/0	0	0	hela_waters_3.raw
High	A	2	MQASIEK	3216	Unambiguous	Nucleophosmin OS=Homo sapiens OX=9606 GN=NPM1 PE=1 SV=2 - [NPM_HUMAN]	1	1	P06748		HCD	1	0	1	1	0.002	0.0246	159	162	1.15	0	55	60	2946000	2	403.707	806.407	0	-0.77	25.21	7143	7143	MS2	0/0	0	0	hela_waters_3.raw
High	A	2	NQGGYGGSSSSSSYGSGR	2114	Unambiguous	Heterogeneous nuclear ribonucleoprotein A1 OS=Homo sapiens OX=9606 GN=HNRNPA1 PE=1 SV=5 - [ROA1_HUMAN]	1	1	P09651		HCD	1	0	1	1	0	4.21e-16	13	9	4.18	0	2	11	32460000	2	847.852	1694.7	0	-2.46	25.22	7145	7145	MS2	0/0	0	0	hela_waters_3.raw
High	A	2	cDSSPDSAEDVR	2633	Unambiguous	Alpha-2-HS-glycoprotein OS=Homo sapiens OX=9606 GN=AHSG PE=1 SV=2 - [FETUA_HUMAN]	1	1	P02765	C1(Carbamidomethyl)	HCD	1	0	1	1	0	4.21e-16	10	8	2.84	0	50	23	15670000	2	669.266	1337.52	0	-1.88	25.22	7146	7146	MS2	0/0	0	0	hela_waters_3.raw
High	A	2	SDAEEDGGTVSQEEEDR	3223	Unambiguous	Calnexin OS=Homo sapiens OX=9606 GN=CANX PE=1 SV=2 - [CALX_HUMAN]	1	1	P27824		HCD	1	0	1	1	0	4.21e-16	7	8	3.66	0	0	60	3536000	2	926.866	1852.73	0	-3.23	25.22	7147	7147	MS2	0/0	0	0	hela_waters_3.raw
High	A	2	IVQAEGEAEAAK	3225	Unambiguous	Prohibitin-2 OS=Homo sapiens OX=9606 GN=PHB2 PE=1 SV=2 - [PHB2_HUMAN]	1	1	Q99623		HCD	1	0	1	1	0	2.52e-11	165	178	2.33	0	8	16	25260000	2	608.313	1215.62	0	-1.71	25.22	7148	7148	MS2	0/0	0	0	hela_waters_3.raw
High	A	2	IEDVGSDEEDDSGK	3229	Unambiguous	Heat shock protein HSP 90-beta OS=Homo sapiens OX=9606 GN=HSP90AB1 PE=1 SV=4 - [HS90B_HUMAN]	2	1	P08238		HCD	1	0	1	1	0	4.21e-16	21	20	3	0	23	59	13220000	2	747.806	1494.6	0	-2.25	25.22	7150	7150	MS2	0/0	0	0	hela_waters_3.raw
High	A	2	YSEGYPGQR	3233	Unambiguous	Serine hydroxymethyltransferase, cytosolic OS=Homo sapiens OX=9606 GN=SHMT1 PE=1 SV=1 - [GLYC_HUMAN]	1	1	P34896		HCD	1	0	1	1	0	2.4e-07	71	63	1.67	0	12	60	7314000	2	528.74	1056.47	0	-1.26	25.23	7152	7152	MS2	0/0	0	0	hela_waters_3.raw
High	A	2	QPPTAAGRPVDASPR	3235	Unambiguous	Cytoplasmic dynein 1 light intermediate chain 1 OS=Homo sapiens OX=9606 GN=DYNC1LI1 PE=1 SV=3 - [DC1L1_HUMAN]	1	1	Q9Y6G9		HCD	1	0	1	1	0	0.00443	209	202	2.21	0	41	36	4872000	3	507.27	1519.8	0	-1.53	25.23	7153	7153	MS2	0/0	0	0	hela_waters_3.raw
High	A	2	SEENEEPMETDQNAK	3239	Unambiguous	Heat shock 70 kDa protein 4 OS=Homo sapiens OX=9606 GN=HSPA4 PE=1 SV=4 - [HSP74_HUMAN]	1	1	P34932		HCD	1	0	1	1	0	6.66e-14	13	14	2.82	0	20	60	5440000	2	875.856	1750.7	0	-1.73	25.23	7155	7155	MS2	0/0	0	0	hela_waters_3.raw
High	A	2	RILMEHIHK	3252	Unambiguous	60S ribosomal protein L19 OS=Homo sapiens OX=9606 GN=RPL19 PE=1 SV=1 - [RL19_HUMAN]	1	1	P84098		HCD	1	0	1	1	0	0.000428	164	184	2.85	1	21	60	4039000	3	392.894	1176.67	0	0.28	25.24	7160	7160	MS2	0/0	0	0	hela_waters_3.raw
High	A	2	VPASQPRPESKPESQIPPQRPQR	3152	Unambiguous	Ras GTPase-activating protein-binding protein 1 OS=Homo sapiens OX=9606 GN=G3BP1 PE=1 SV=1 - [G3BP1_HUMAN]	1	1	Q13283		HCD	1	0	1	1	0.001	0.00955	141	137	1.22	0	8	60	3152000	3	870.466	2609.38	0	-2.67	25.24	7161	7161	MS2	0/0	0	0	hela_waters_3.raw
Middle	A	2	AKDDDDSDIPTAQR	3258	Unambiguous	C-Jun-amino-terminal kinase-interacting protein 4 OS=Homo sapiens OX=9606 GN=SPAG9 PE=1 SV=4 - [JIP4_HUMAN]	1	1	O60271		HCD	1	0	1	1	0.036	0.476	52	62	1.58	1	9	60	1473000	2	773.847	1546.69	-0.01	-7.66	25.24	7163	7163	MS2	0/0	0	0	hela_waters_3.raw
High	A	2	DPAEGDGAQPEETPR	3262	Unambiguous	Neutral alpha-glucosidase AB OS=Homo sapiens OX=9606 GN=GANAB PE=1 SV=3 - [GANAB_HUMAN]	1	1	Q14697		HCD	1	0	1	1	0	4.21e-16	49	53	4.63	0	3	6	80850000	2	784.844	1568.68	0	-1.47	25.25	7166	7166	MS2	0/0	0	0	hela_waters_3.raw
High	A	2	GSGTAEVELKK	3154	Unambiguous	Pyruvate kinase PKM OS=Homo sapiens OX=9606 GN=PKM PE=1 SV=4 - [KPYM_HUMAN]	1	1	P14618		HCD	1	0	1	1	0.009	0.121	220	202	2.02	1	13	38	6226000	3	373.54	1118.6	0	-0.61	25.25	7167	7167	MS2	0/0	0	0	hela_waters_3.raw
High	A	2	TDAPQPDVKEEEEEKEEEK	3268	Unambiguous	Calnexin OS=Homo sapiens OX=9606 GN=CANX PE=1 SV=2 - [CALX_HUMAN]	1	1	P27824		HCD	1	0	1	1	0	4.59e-07	81	87	3.95	2	2	34	27740000	3	753.675	2259.01	0	-1.45	25.26	7169	7169	MS2	0/0	0	0	hela_waters_3.raw
High	A	2	EHHNGNFTDPSSVNEK	3276	Unambiguous	Vacuole membrane protein 1 OS=Homo sapiens OX=9606 GN=VMP1 PE=1 SV=1 - [VMP1_HUMAN]	1	1	Q96GC9		HCD	1	0	1	1	0	5.98e-12	50	50	2.89	0	70	60	3296000	3	604.604	1811.8	0	1.19	25.26	7174	7174	MS2	0/0	0	0	hela_waters_3.raw
High	A	2	LAQLAGDHEcGSSSQR	3286	Unambiguous	Inner nuclear membrane protein Man1 OS=Homo sapiens OX=9606 GN=LEMD3 PE=1 SV=2 - [MAN1_HUMAN]	1	1	Q9Y2U8	C10(Carbamidomethyl)	HCD	1	0	1	1	0	2.27e-07	80	78	2.64	0	42	60	2438000	3	572.596	1715.77	0	-2.28	25.27	7179	7179	MS2	0/0	0	0	hela_waters_3.raw
High	A	2	NKYEDEINKR	2719	Unambiguous	Keratin, type II cytoskeletal 8 OS=Homo sapiens OX=9606 GN=KRT8 PE=1 SV=7 - [K2C8_HUMAN]	6	1	P05787		HCD	1	0	1	1	0	2.8e-06	201	215	2.52	2	30	16	15800000	3	436.889	1308.65	0	-1.54	25.29	7186	7186	MS2	0/0	0	0	hela_waters_3.raw
High	A	2	NYQQNYQNSESGEK	2707	Unambiguous	Nuclease-sensitive element-binding protein 1 OS=Homo sapiens OX=9606 GN=YBX1 PE=1 SV=3 - [YBOX1_HUMAN]	1	1	P67809		HCD	1	0	1	1	0	3.1e-13	26	32	2.76	0	0	60	8925000	2	844.857	1688.71	0	-4.74	25.29	7187	7187	MS2	0/0	0	0	hela_waters_3.raw
High	A	2	ENQQATSGPNQPSVR	2715	Unambiguous	Y-box-binding protein 3 OS=Homo sapiens OX=9606 GN=YBX3 PE=1 SV=4 - [YBOX3_HUMAN]	1	1	P16989		HCD	1	0	1	1	0	2.69e-12	138	138	2.66	0	0	60	6451000	2	806.885	1612.76	0	-2.47	25.29	7188	7188	MS2	0/0	0	0	hela_waters_3.raw
High	A	2	RKEDEVEEWQHR	3314	Unambiguous	Ezrin OS=Homo sapiens OX=9606 GN=EZR PE=1 SV=4 - [EZRI_HUMAN]	1	1	P15311		HCD	1	0	1	1	0.009	0.11	140	145	2.73	2	14	29	7131000	4	410.949	1640.77	0	-2.1	25.3	7195	7195	MS2	0/0	0	0	hela_waters_3.raw
High	A	2	YVLHcQGTEEEK	3316	Unambiguous	Eukaryotic peptide chain release factor subunit 1 OS=Homo sapiens OX=9606 GN=ETF1 PE=1 SV=3 - [ERF1_HUMAN]	1	1	P62495	C5(Carbamidomethyl)	HCD	1	0	1	1	0	0.000106	67	78	1.73	0	40	37	7090000	3	498.227	1492.67	0	-5.44	25.3	7196	7196	MS2	0/0	0	0	hela_waters_3.raw
High	A	2	SSPSGPSNPSNPSVEEK	3318	Unambiguous	BRI3-binding protein OS=Homo sapiens OX=9606 GN=BRI3BP PE=1 SV=1 - [BRI3B_HUMAN]	1	1	Q8WY22		HCD	1	0	1	1	0	4.21e-16	94	89	2.92	0	13	60	6852000	2	850.39	1699.77	0	-2.01	25.3	7197	7197	MS2	0/0	0	0	hela_waters_3.raw
High	A	2	QNQTTSAVSTPASSETSK	3320	Unambiguous	E3 SUMO-protein ligase RanBP2 OS=Homo sapiens OX=9606 GN=RANBP2 PE=1 SV=2 - [RBP2_HUMAN]	1	1	P49792		HCD	1	0	1	1	0	4.21e-16	136	146	3.94	0	0	60	3845000	2	912.434	1823.86	0	-1.1	25.31	7198	7198	MS2	0/0	0	0	hela_waters_3.raw
High	A	2	HPDEDAVEAEGHEVK	3332	Unambiguous	Serine/threonine-protein phosphatase 4 regulatory subunit 2 OS=Homo sapiens OX=9606 GN=PPP4R2 PE=1 SV=3 - [PP4R2_HUMAN]	1	1	Q9NY27		HCD	1	0	1	1	0	7.74e-11	57	60	2.94	0	66	60	4415000	3	554.584	1661.74	0	-1.05	25.32	7204	7204	MS2	0/0	0	0	hela_waters_3.raw
High	A	2	APKPDGPGGGPGGSHMGGNYGDDR	2242	Unambiguous	RNA-binding protein FUS OS=Homo sapiens OX=9606 GN=FUS PE=1 SV=1 - [FUS_HUMAN]	1	1	P35637		HCD	1	0	1	1	0	4.21e-16	29	33	2.39	0	0	60	1245000	2	1126.99	2252.98	0	1.85	25.32	7207	7207	MS2	0/0	0	0	hela_waters_3.raw
High	A	2	DSYVGDEAQSK	2761	Unambiguous	Actin, alpha cardiac muscle 1 OS=Homo sapiens OX=9606 GN=ACTC1 PE=1 SV=1 - [ACTC_HUMAN]|Actin, cytoplasmic 1 OS=Homo sapiens OX=9606 GN=ACTB PE=1 SV=1 - [ACTB_HUMAN]	6	2	P68032;P60709		HCD	1	0	1	1	0	2.38e-07	57	54	1.72	0	1	1	228300000	2	599.765	1198.52	0	-0.32	25.33	7210	7210	MS2	0/0	0	0	hela_waters_3.raw
High	A	2	HYAHTDcPGHADYVK	2188	Unambiguous	Elongation factor Tu, mitochondrial OS=Homo sapiens OX=9606 GN=TUFM PE=1 SV=2 - [EFTU_HUMAN]	1	1	P49411	C7(Carbamidomethyl)	HCD	1	0	1	1	0	8.9e-08	40	41	2.34	0	13	36	7873000	4	443.447	1770.77	0	0.26	25.33	7212	7212	MS2	0/0	0	0	hela_waters_3.raw
High	A	2	APKPDGPGGGPGGSHMGGNYGDDR	2242	Unambiguous	RNA-binding protein FUS OS=Homo sapiens OX=9606 GN=FUS PE=1 SV=1 - [FUS_HUMAN]	1	1	P35637		HCD	1	0	1	1	0	8.63e-12	20	26	2.57	0	4	2	122100000	4	563.999	2252.97	0	-0.06	25.33	7213	7213	MS2	0/0	0	0	hela_waters_3.raw
High	A	2	APKPDGPGGGPGGSHMGGNYGDDR	2242	Unambiguous	RNA-binding protein FUS OS=Homo sapiens OX=9606 GN=FUS PE=1 SV=1 - [FUS_HUMAN]	1	1	P35637		HCD	1	0	1	1	0	4.21e-16	25	29	5.99	0	11	17	53450000	3	751.662	2252.97	0	-1.27	25.33	7214	7214	MS2	0/0	0	0	hela_waters_3.raw
High	A	2	SGSMDPSGAHPSVR	3352	Unambiguous	KH domain-containing, RNA-binding, signal transduction-associated protein 1 OS=Homo sapiens OX=9606 GN=KHDRBS1 PE=1 SV=1 - [KHDR1_HUMAN]	1	1	Q07666		HCD	1	0	1	1	0	8.31e-09	83	69	2.9	0	29	16	17230000	3	462.214	1384.63	0	-0.43	25.33	7215	7215	MS2	0/0	0	0	hela_waters_3.raw
High	A	2	MEELHNQEMQK	3358	Unambiguous	Splicing factor, proline- and glutamine-rich OS=Homo sapiens OX=9606 GN=SFPQ PE=1 SV=2 - [SFPQ_HUMAN]	1	1	P23246		HCD	1	0	1	1	0	4.21e-16	65	56	3.8	0	21	60	11500000	2	708.817	1416.63	0	0.86	25.34	7218	7218	MS2	0/0	0	0	hela_waters_3.raw
High	A	2	NcTYTQVQTR	3360	Unambiguous	Transcription elongation factor A protein 1 OS=Homo sapiens OX=9606 GN=TCEA1 PE=1 SV=2 - [TCEA1_HUMAN]	2	1	P23193	C2(Carbamidomethyl)	HCD	1	0	1	1	0	1.74e-09	92	81	2.64	0	45	60	6336000	2	635.795	1270.58	0	-1.13	25.34	7219	7219	MS2	0/0	0	0	hela_waters_3.raw
High	A	2	HIHITQATETTTTR	3362	Unambiguous	Clathrin interactor 1 OS=Homo sapiens OX=9606 GN=CLINT1 PE=1 SV=1 - [EPN4_HUMAN]	1	1	Q14677		HCD	1	0	1	1	0	0.00235	202	210	1.8	0	44	53	4601000	3	537.282	1609.83	0	1.07	25.34	7220	7220	MS2	0/0	0	0	hela_waters_3.raw
High	A	2	HLGYKPEEYK	3372	Unambiguous	Unconventional myosin-Ic OS=Homo sapiens OX=9606 GN=MYO1C PE=1 SV=4 - [MYO1C_HUMAN]	1	1	O00159		HCD	1	0	1	1	0.001	0.0066	201	242	2.05	0	54	41	5145000	3	421.883	1263.63	0	-1.69	25.35	7225	7225	MS2	0/0	0	0	hela_waters_3.raw
High	A	2	AVTEQGHELSNEER	2788	Unambiguous	14-3-3 protein beta/alpha OS=Homo sapiens OX=9606 GN=YWHAB PE=1 SV=3 - [1433B_HUMAN]	1	1	P31946		HCD	1	0	1	1	0	2.23e-15	121	132	2.88	0	12	8	41940000	3	533.584	1598.74	0	-1.18	25.36	7232	7232	MS2	0/0	0	0	hela_waters_3.raw
High	A	2	AVTEQGHELSNEER	2788	Unambiguous	14-3-3 protein beta/alpha OS=Homo sapiens OX=9606 GN=YWHAB PE=1 SV=3 - [1433B_HUMAN]	1	1	P31946		HCD	1	0	1	1	0	4.21e-16	122	135	3.59	0	5	41	19880000	2	799.873	1598.74	0	-1.56	25.36	7233	7233	MS2	0/0	0	0	hela_waters_3.raw
High	A	2	YVLHcQGTEEEK	3316	Unambiguous	Eukaryotic peptide chain release factor subunit 1 OS=Homo sapiens OX=9606 GN=ETF1 PE=1 SV=3 - [ERF1_HUMAN]	1	1	P62495	C5(Carbamidomethyl)	HCD	1	0	1	1	0	5.03e-12	75	82	2.51	0	37	53	13730000	2	746.839	1492.67	0	-1.86	25.37	7234	7234	MS2	0/0	0	0	hela_waters_3.raw
High	A	2	ATYDGNHDTFR	3394	Unambiguous	ER lumen protein-retaining receptor 1 OS=Homo sapiens OX=9606 GN=KDELR1 PE=1 SV=1 - [ERD21_HUMAN]	2	1	P24390		HCD	1	0	1	1	0.009	0.117	52	42	2.25	0	21	50	8028000	3	432.857	1296.56	0	-2	25.37	7237	7237	MS2	0/0	0	0	hela_waters_3.raw
High	A	2	LPDAHSDYAR	3398	Unambiguous	RNA-binding protein 14 OS=Homo sapiens OX=9606 GN=RBM14 PE=1 SV=2 - [RBM14_HUMAN]	1	1	Q96PK6		HCD	1	0	1	1	0	6.88e-05	80	75	2.31	0	12	60	3622000	3	382.184	1144.54	0	-1.56	25.37	7239	7239	MS2	0/0	0	0	hela_waters_3.raw
High	A	2	YTHAANTVVYSSNK	3400	Unambiguous	WD repeat-containing protein 82 OS=Homo sapiens OX=9606 GN=WDR82 PE=1 SV=1 - [WDR82_HUMAN]	1	1	Q6UXN9		HCD	1	0	1	1	0	0.000155	197	165	1.66	0	37	60	3092000	2	777.88	1554.75	0	-1.59	25.37	7240	7240	MS2	0/0	0	0	hela_waters_3.raw
High	A	2	KPLTSSSAAPQRPISTQR	3402	Unambiguous	Microtubule-associated protein RP/EB family member 1 OS=Homo sapiens OX=9606 GN=MAPRE1 PE=1 SV=3 - [MARE1_HUMAN]	1	1	Q15691		HCD	1	0	1	1	0	2.38e-11	130	139	2.96	0	18	26	12220000	4	482.019	1925.06	0	-0.17	25.38	7241	7241	MS2	0/0	0	0	hela_waters_3.raw
High	A	2	IMScSPDTQcSR	3404	Unambiguous	(E3-independent) E2 ubiquitin-conjugating enzyme OS=Homo sapiens OX=9606 GN=UBE2O PE=1 SV=3 - [UBE2O_HUMAN]	1	1	Q9C0C9	C4(Carbamidomethyl); C10(Carbamidomethyl)	HCD	1	0	1	1	0.004	0.0472	10	9	1.31	0	69	60	3954000	2	721.292	1441.58	0	-6.57	25.38	7242	7242	MS2	0/0	0	0	hela_waters_3.raw
High	A	2	ALGQAASDNSGPEDAK	3406	Unambiguous	Nodal modulator 1 OS=Homo sapiens OX=9606 GN=NOMO1 PE=1 SV=5 - [NOMO1_HUMAN]	1	1	Q15155		HCD	1	0	1	1	0	2.34e-10	106	107	2.36	0	52	60	2565000	2	765.858	1530.71	0	3.37	25.38	7243	7243	MS2	0/0	0	0	hela_waters_3.raw
High	A	2	EEPSQNDISPK	3424	Unambiguous	Nucleolar RNA helicase 2 OS=Homo sapiens OX=9606 GN=DDX21 PE=1 SV=5 - [DDX21_HUMAN]	1	1	Q9NR30		HCD	1	0	1	1	0	1.7e-11	80	86	2.41	0	26	23	17480000	2	622.294	1243.58	0	0.38	25.4	7253	7253	MS2	0/0	0	0	hela_waters_3.raw
High	A	2	HTNYTMEHIR	3428	Unambiguous	Alpha-actinin-1 OS=Homo sapiens OX=9606 GN=ACTN1 PE=1 SV=2 - [ACTN1_HUMAN]|Alpha-actinin-4 OS=Homo sapiens OX=9606 GN=ACTN4 PE=1 SV=2 - [ACTN4_HUMAN]|Alpha-actinin-2 OS=Homo sapiens OX=9606 GN=ACTN2 PE=1 SV=1 - [ACTN2_HUMAN]	3	2	P12814;O43707		HCD	1	0	1	1	0	4.15e-07	97	85	2.73	0	5	7	33780000	3	434.54	1301.61	0	0.21	25.4	7255	7255	MS2	0/0	0	0	hela_waters_3.raw
High	A	2	DAQHYGGWEHR	3430	Unambiguous	Neutral alpha-glucosidase AB OS=Homo sapiens OX=9606 GN=GANAB PE=1 SV=3 - [GANAB_HUMAN]	1	1	Q14697		HCD	1	0	1	1	0	2.14e-09	47	46	2.56	0	35	8	30640000	3	452.534	1355.59	0	0.34	25.4	7256	7256	MS2	0/0	0	0	hela_waters_3.raw
High	A	2	KPLTSSSAAPQRPISTQR	3402	Unambiguous	Microtubule-associated protein RP/EB family member 1 OS=Homo sapiens OX=9606 GN=MAPRE1 PE=1 SV=3 - [MARE1_HUMAN]	1	1	Q15691		HCD	1	0	1	1	0	2.04e-06	129	139	3.97	0	8	14	27330000	3	642.356	1925.05	0	-1.02	25.4	7257	7257	MS2	0/0	0	0	hela_waters_3.raw
High	A	2	DYDAMGSQTK	3434	Unambiguous	RuvB-like 2 OS=Homo sapiens OX=9606 GN=RUVBL2 PE=1 SV=3 - [RUVB2_HUMAN]	1	1	Q9Y230		HCD	1	0	1	1	0	4.86e-06	28	18	1.63	0	44	14	16850000	2	558.238	1115.47	0	0.37	25.4	7258	7258	MS2	0/0	0	0	hela_waters_3.raw
High	A	2	QEAGISEGQGTAGEEEEK	3445	Unambiguous	Density-regulated protein OS=Homo sapiens OX=9606 GN=DENR PE=1 SV=2 - [DENR_HUMAN]	1	1	O43583		HCD	1	0	1	1	0	4.21e-16	67	59	3.57	0	0	60	6083000	2	924.908	1848.81	0	-0.58	25.41	7263	7263	MS2	0/0	0	0	hela_waters_3.raw
High	A	2	VYEGERPLTK	3451	Unambiguous	Endoplasmic reticulum chaperone BiP OS=Homo sapiens OX=9606 GN=HSPA5 PE=1 SV=2 - [BIP_HUMAN]	1	1	P11021		HCD	1	0	1	1	0.003	0.0416	230	232	1.54	0	57	60	2490000	3	397.884	1191.64	0	-0.27	25.42	7266	7266	MS2	0/0	0	0	hela_waters_3.raw
High	A	2	QDPQLHPEDPERR	3453	Unambiguous	39S ribosomal protein L28, mitochondrial OS=Homo sapiens OX=9606 GN=MRPL28 PE=1 SV=4 - [RM28_HUMAN]	1	1	Q13084		HCD	1	0	1	1	0.003	0.0321	161	160	2.26	1	27	60	1487000	4	404.95	1616.78	0	-0.01	25.42	7267	7267	MS2	0/0	0	0	hela_waters_3.raw
High	A	2	NKYEDEINK	2829	Unambiguous	Keratin, type II cytoskeletal 8 OS=Homo sapiens OX=9606 GN=KRT8 PE=1 SV=7 - [K2C8_HUMAN]|Keratin, type II cytoskeletal 79 OS=Homo sapiens OX=9606 GN=KRT79 PE=1 SV=2 - [K2C79_HUMAN]	7	1	P05787		HCD	1	0	1	1	0.003	0.036	140	140	0.97	1	54	5	31100000	2	576.78	1152.55	0	0.08	25.42	7269	7269	MS2	0/0	0	0	hela_waters_3.raw
High	A	2	TDAPQPDVKEEEEEK	3459	Unambiguous	Calnexin OS=Homo sapiens OX=9606 GN=CANX PE=1 SV=2 - [CALX_HUMAN]	1	1	P27824		HCD	1	0	1	1	0	6.99e-10	78	74	1.83	1	25	15	10320000	3	581.936	1743.79	0	0.35	25.42	7270	7270	MS2	0/0	0	0	hela_waters_3.raw
High	A	2	LQSIGTENTEENRR	3455	Unambiguous	Fructose-bisphosphate aldolase A OS=Homo sapiens OX=9606 GN=ALDOA PE=1 SV=2 - [ALDOA_HUMAN]	1	1	P04075		HCD	1	0	1	1	0	0.0013	165	204	2.25	1	12	60	7580000	2	823.909	1646.81	0	0.62	25.42	7271	7271	MS2	0/0	0	0	hela_waters_3.raw
High	A	2	ESEPQAAAEPAEAK	3463	Unambiguous	Brain acid soluble protein 1 OS=Homo sapiens OX=9606 GN=BASP1 PE=1 SV=2 - [BASP1_HUMAN]	1	1	P80723		HCD	1	0	1	1	0	2.27e-13	93	102	1.98	0	6	4	96500000	2	714.336	1427.66	0	-0.17	25.43	7273	7273	MS2	0/0	0	0	hela_waters_3.raw
High	A	2	AFHNEAQVNPER	2862	Unambiguous	T-complex protein 1 subunit alpha OS=Homo sapiens OX=9606 GN=TCP1 PE=1 SV=1 - [TCPA_HUMAN]	1	1	P17987		HCD	1	0	1	1	0	2.05e-07	126	125	2.76	0	7	5	67220000	3	471.229	1411.67	0	0.65	25.43	7274	7274	MS2	0/0	0	0	hela_waters_3.raw
High	A	2	ADAEGESDLENSR	3467	Unambiguous	Talin-1 OS=Homo sapiens OX=9606 GN=TLN1 PE=1 SV=3 - [TLN1_HUMAN]	1	1	Q9Y490		HCD	1	0	1	1	0	2.06e-14	36	29	2.62	0	37	60	7055000	2	696.797	1392.59	0	-1.21	25.43	7275	7275	MS2	0/0	0	0	hela_waters_3.raw
High	A	2	AIQGGTSHHLGQNFSK	3471	Unambiguous	Bifunctional glutamate/proline--tRNA ligase OS=Homo sapiens OX=9606 GN=EPRS PE=1 SV=5 - [SYEP_HUMAN]	1	1	P07814		HCD	1	0	1	1	0	0.000113	212	189	2.56	0	14	17	22470000	3	561.285	1681.84	0	0	25.43	7277	7277	MS2	0/0	0	0	hela_waters_3.raw
High	A	2	HGVIVAADSR	3473	Unambiguous	Proteasome subunit beta type-5 OS=Homo sapiens OX=9606 GN=PSMB5 PE=1 SV=3 - [PSB5_HUMAN]	1	1	P28074		HCD	1	0	1	1	0	7.63e-11	120	117	2.86	0	38	60	8538000	2	512.781	1024.55	0	0.4	25.44	7278	7278	MS2	0/0	0	0	hela_waters_3.raw
High	A	2	YLHDESGLNR	3475	Unambiguous	Septin-2 OS=Homo sapiens OX=9606 GN=SEPT2 PE=1 SV=1 - [SEPT2_HUMAN]	1	1	Q15019		HCD	1	0	1	1	0.002	0.0142	120	123	2.33	0	16	59	5824000	3	401.864	1203.58	0	0.67	25.44	7279	7279	MS2	0/0	0	0	hela_waters_3.raw
High	A	2	TDAPQPDVKEEEEEK	3459	Unambiguous	Calnexin OS=Homo sapiens OX=9606 GN=CANX PE=1 SV=2 - [CALX_HUMAN]	1	1	P27824		HCD	1	0	1	1	0	3.61e-07	78	74	2.46	1	11	60	4912000	2	872.4	1743.79	0	0.43	25.44	7281	7281	MS2	0/0	0	0	hela_waters_3.raw
High	A	2	MRPGVAcSVSQAQK	3481	Unambiguous	60S ribosomal protein L9 OS=Homo sapiens OX=9606 GN=RPL9 PE=1 SV=1 - [RL9_HUMAN]	1	1	P32969	C7(Carbamidomethyl)	HCD	1	0	1	1	0	3.67e-10	190	181	3.42	0	53	41	4476000	3	506.922	1518.75	0	-1.09	25.44	7282	7282	MS2	0/0	0	0	hela_waters_3.raw
High	A	2	SNIHcNTIAPNAGSR	3483	Unambiguous	Peroxisomal multifunctional enzyme type 2 OS=Homo sapiens OX=9606 GN=HSD17B4 PE=1 SV=3 - [DHB4_HUMAN]	1	1	P51659	C5(Carbamidomethyl)	HCD	1	0	1	1	0	3.73e-14	122	130	3.19	0	21	60	6670000	2	806.386	1611.76	0	-1.14	25.44	7283	7283	MS2	0/0	0	0	hela_waters_3.raw
High	A	2	QEEENPAEETGEEK	2814	Unambiguous	Alpha-endosulfine OS=Homo sapiens OX=9606 GN=ENSA PE=1 SV=1 - [ENSA_HUMAN]	1	1	O43768		HCD	1	0	1	1	0.001	0.00707	29	17	1.67	0	0	60	3411000	2	809.838	1618.67	0	-1.29	25.45	7285	7285	MS2	0/0	0	0	hela_waters_3.raw
High	A	2	NAAPPPSNTEAPPGETR	3496	Unambiguous	ATP-dependent RNA helicase DDX24 OS=Homo sapiens OX=9606 GN=DDX24 PE=1 SV=1 - [DDX24_HUMAN]	1	1	Q9GZR7		HCD	1	0	1	1	0	1.91e-07	161	152	1.97	0	0	60	1327000	2	853.408	1705.81	0	-3.19	25.45	7290	7290	MS2	0/0	0	0	hela_waters_3.raw
High	A	2	AFHNEAQVNPER	2862	Unambiguous	T-complex protein 1 subunit alpha OS=Homo sapiens OX=9606 GN=TCP1 PE=1 SV=1 - [TCPA_HUMAN]	1	1	P17987		HCD	1	0	1	1	0	2.35e-08	121	120	2.33	0	32	18	16890000	2	706.34	1411.67	0	1.61	25.46	7293	7293	MS2	0/0	0	0	hela_waters_3.raw
High	A	2	EVAEAATGEDASSPPPK	3502	Unambiguous	Synaptic vesicle membrane protein VAT-1 homolog OS=Homo sapiens OX=9606 GN=VAT1 PE=1 SV=2 - [VAT1_HUMAN]	1	1	Q99536		HCD	1	0	1	1	0	4.21e-16	131	135	3.71	0	0	60	6867000	2	828.393	1655.78	0	1.44	25.46	7294	7294	MS2	0/0	0	0	hela_waters_3.raw
High	A	2	VGGTSDVEVNEK	3506	Unambiguous	60 kDa heat shock protein, mitochondrial OS=Homo sapiens OX=9606 GN=HSPD1 PE=1 SV=2 - [CH60_HUMAN]	1	1	P10809		HCD	1	0	1	1	0	3.87e-15	153	145	2.33	0	13	3	89580000	2	617.302	1233.6	0	0.65	25.47	7296	7296	MS2	0/0	0	0	hela_waters_3.raw
High	A	2	MRPGVAcSVSQAQK	3481	Unambiguous	60S ribosomal protein L9 OS=Homo sapiens OX=9606 GN=RPL9 PE=1 SV=1 - [RL9_HUMAN]	1	1	P32969	C7(Carbamidomethyl)	HCD	1	0	1	1	0	4.21e-16	204	198	4.8	0	6	43	19170000	2	759.88	1518.75	0	0.33	25.47	7298	7298	MS2	0/0	0	0	hela_waters_3.raw
High	A	2	EIESSPQYR	3514	Unambiguous	Ataxin-2-like protein OS=Homo sapiens OX=9606 GN=ATXN2L PE=1 SV=2 - [ATX2L_HUMAN]	1	1	Q8WWM7		HCD	1	0	1	1	0	0.000172	163	139	2	0	38	21	10470000	2	554.767	1108.53	0	0.28	25.47	7300	7300	MS2	0/0	0	0	hela_waters_3.raw
High	A	2	HDWDYcEHR	19	Unambiguous	NADH dehydrogenase [ubiquinone] 1 beta subcomplex subunit 7 OS=Homo sapiens OX=9606 GN=NDUFB7 PE=1 SV=4 - [NDUB7_HUMAN]	1	1	P17568	C6(Carbamidomethyl)	HCD	1	0	1	1	0	0.000922	3	6	1.95	0	53	29	6387000	3	439.841	1317.51	0	1.15	25.47	7301	7301	MS2	0/0	0	0	hela_waters_3.raw
High	A	2	NIDEHANEDVER	2876	Unambiguous	Ras-related protein Rab-10 OS=Homo sapiens OX=9606 GN=RAB10 PE=1 SV=1 - [RAB10_HUMAN]	1	1	P61026		HCD	1	0	1	1	0	9.49e-13	54	55	1.77	0		60	0	2	720.822	1440.64	0	1.01	25.47	7302	7302	MS2	0/0	0	0	hela_waters_3.raw
High	A	2	SNIHcNTIAPNAGSR	3483	Unambiguous	Peroxisomal multifunctional enzyme type 2 OS=Homo sapiens OX=9606 GN=HSD17B4 PE=1 SV=3 - [DHB4_HUMAN]	1	1	P51659	C5(Carbamidomethyl)	HCD	1	0	1	1	0	8.11e-09	126	142	2.96	0	32	15	21050000	3	537.927	1611.77	0	0.48	25.48	7303	7303	MS2	0/0	0	0	hela_waters_3.raw
High	A	2	ADTQTYQPYNK	3522	Unambiguous	Enhancer of rudimentary homolog OS=Homo sapiens OX=9606 GN=ERH PE=1 SV=1 - [ERH_HUMAN]	1	1	P84090		HCD	1	0	1	1	0	0.00545	89	84	1.88	0	34	60	10140000	2	664.811	1328.61	0	1.75	25.48	7304	7304	MS2	0/0	0	0	hela_waters_3.raw
High	A	2	VEQATKPSFESGR	3524	Unambiguous	RNA-binding motif protein, X chromosome OS=Homo sapiens OX=9606 GN=RBMX PE=1 SV=3 - [RBMX_HUMAN]	1	1	P38159		HCD	1	0	1	1	0	4.21e-16	197	210	2.99	0	68	28	9000000	3	479.244	1435.72	0	0.85	25.48	7305	7305	MS2	0/0	0	0	hela_waters_3.raw
High	A	2	DHTVSGDEDYcPR	3532	Unambiguous	Tyrosine-protein kinase BAZ1B OS=Homo sapiens OX=9606 GN=BAZ1B PE=1 SV=2 - [BAZ1B_HUMAN]	1	1	Q9UIG0	C11(Carbamidomethyl)	HCD	1	0	1	1	0	1.62e-10	10	9	2.38	0	19	60	2916000	2	775.813	1550.62	0	0.75	25.49	7310	7310	MS2	0/0	0	0	hela_waters_3.raw
High	A	2	ISGSGSNSDMMENSK	3534	Unambiguous	Transcriptional regulator ATRX OS=Homo sapiens OX=9606 GN=ATRX PE=1 SV=5 - [ATRX_HUMAN]	1	1	P46100		HCD	1	0	1	1	0	1.7e-05	29	22	1.72	0	66	60	2155000	2	772.322	1543.64	0	0.57	25.49	7311	7311	MS2	0/0	0	0	hela_waters_3.raw
High	A	2	VAPAQPSEEGPGR	2946	Unambiguous	Eukaryotic translation initiation factor 4B OS=Homo sapiens OX=9606 GN=EIF4B PE=1 SV=2 - [IF4B_HUMAN]	1	1	P23588		HCD	1	0	1	1	0	1.74e-13	197	219	2.68	0	28	44	12030000	2	647.824	1294.64	0	0.88	25.5	7314	7314	MS2	0/0	0	0	hela_waters_3.raw
High	A	2	VADNAQQQYVR	3544	Unambiguous	ATP-dependent RNA helicase DDX54 OS=Homo sapiens OX=9606 GN=DDX54 PE=1 SV=2 - [DDX54_HUMAN]	1	1	Q8TDD1		HCD	1	0	1	1	0	1.5e-10	178	181	2.76	0	28	47	15430000	2	646.321	1291.63	0	-3.42	25.5	7317	7317	MS2	0/0	0	0	hela_waters_3.raw
High	A	2	VEQATKPSFESGR	3524	Unambiguous	RNA-binding motif protein, X chromosome OS=Homo sapiens OX=9606 GN=RBMX PE=1 SV=3 - [RBMX_HUMAN]	1	1	P38159		HCD	1	0	1	1	0	1.35e-12	195	203	3.11	0	31	49	14200000	2	718.363	1435.72	0	0.2	25.5	7318	7318	MS2	0/0	0	0	hela_waters_3.raw
High	A	2	VAEVEGEQVDNK	3548	Unambiguous	Mitochondrial proton/calcium exchanger protein OS=Homo sapiens OX=9606 GN=LETM1 PE=1 SV=1 - [LETM1_HUMAN]	1	1	O95202		HCD	1	0	1	1	0	3.46e-11	140	143	2.81	0	22	51	13980000	2	658.82	1316.63	0	0.05	25.5	7319	7319	MS2	0/0	0	0	hela_waters_3.raw
High	A	2	YNHIDESEMK	3550	Unambiguous	Heat shock protein 105 kDa OS=Homo sapiens OX=9606 GN=HSPH1 PE=1 SV=1 - [HS105_HUMAN]	1	1	Q92598		HCD	1	0	1	1	0.005	0.0575	52	45	2.15	0	60	60	9280000	2	633.277	1265.55	0	-0.52	25.5	7320	7320	MS2	0/0	0	0	hela_waters_3.raw
High	A	2	HADHSSLTLGSGSSTTR	3552	Unambiguous	E3 ubiquitin-protein ligase HUWE1 OS=Homo sapiens OX=9606 GN=HUWE1 PE=1 SV=3 - [HUWE1_HUMAN]	1	1	Q7Z6Z7		HCD	1	0	1	1	0	4.21e-16	137	139	3.7	0	22	60	6546000	3	571.944	1713.82	0	0.77	25.51	7321	7321	MS2	0/0	0	0	hela_waters_3.raw
High	A	2	EAAGTTAAAGTGGATEQPPR	3554	Unambiguous	U4/U6.U5 tri-snRNP-associated protein 1 OS=Homo sapiens OX=9606 GN=SART1 PE=1 SV=1 - [SNUT1_HUMAN]	1	1	O43290		HCD	1	0	1	1	0	4.21e-16	150	157	2.68	0	37	60	3405000	2	907.436	1813.86	0	-1.75	25.51	7322	7322	MS2	0/0	0	0	hela_waters_3.raw
High	A	2	EDKYEEEIK	3558	Unambiguous	Tropomyosin alpha-3 chain OS=Homo sapiens OX=9606 GN=TPM3 PE=1 SV=2 - [TPM3_HUMAN]|Tropomyosin alpha-4 chain OS=Homo sapiens OX=9606 GN=TPM4 PE=1 SV=3 - [TPM4_HUMAN]|Tropomyosin beta chain OS=Homo sapiens OX=9606 GN=TPM2 PE=1 SV=1 - [TPM2_HUMAN]	3	3	P06753;P67936;P07951		HCD	1	0	1	1	0.008	0.0892	121	121	1.83	1	15	46	5312000	3	394.856	1182.55	0	1.37	25.51	7324	7324	MS2	0/0	0	0	hela_waters_3.raw
High	A	2	SQYHDLQAPDNQQTK	3562	Unambiguous	SH2 domain-containing protein 4A OS=Homo sapiens OX=9606 GN=SH2D4A PE=1 SV=1 - [SH24A_HUMAN]	1	1	Q9H788		HCD	1	0	1	1	0.001	0.0125	106	107	1.91	0	0	60	1144000	2	886.913	1772.82	0	-0.68	25.52	7327	7327	MS2	0/0	0	0	hela_waters_3.raw
High	A	2	HADHSSLTLGSGSSTTR	3552	Unambiguous	E3 ubiquitin-protein ligase HUWE1 OS=Homo sapiens OX=9606 GN=HUWE1 PE=1 SV=3 - [HUWE1_HUMAN]	1	1	Q7Z6Z7		HCD	1	0	1	1	0	4.21e-16	137	139	2.02	0	0	60	1861000	2	857.412	1713.82	0	0.78	25.52	7329	7329	MS2	0/0	0	0	hela_waters_3.raw
High	A	2	EAFQHEVAHEMPPGSK	3575	Unambiguous	DPY30 domain-containing protein 2 OS=Homo sapiens OX=9606 GN=DYDC2 PE=2 SV=1 - [DYDC2_HUMAN]	1	1	Q96IM9		HCD	1	0	1	1	0.007	0.083	110	105	0.98	0	74	38	4456000	4	449.211	1793.82	0	-1.96	25.53	7335	7335	MS2	0/0	0	0	hela_waters_3.raw
High	A	2	HEQNIDcGGGYVK	3581	Unambiguous	Calreticulin OS=Homo sapiens OX=9606 GN=CALR PE=1 SV=1 - [CALR_HUMAN]	1	1	P27797	C7(Carbamidomethyl)	HCD	1	0	1	1	0	4.21e-16	57	61	3.63	0	2	10	40900000	2	738.83	1476.65	0	-0.28	25.54	7338	7338	MS2	0/0	0	0	hela_waters_3.raw
High	A	2	QYEMGEcTR	3583	Unambiguous	Splicing factor U2AF 35 kDa subunit OS=Homo sapiens OX=9606 GN=U2AF1 PE=1 SV=3 - [U2AF1_HUMAN]	2	1	Q01081	C7(Carbamidomethyl)	HCD	1	0	1	1	0	7.77e-08	15	20	1.97	0	22	18	24890000	2	587.237	1173.47	0	0.72	25.54	7339	7339	MS2	0/0	0	0	hela_waters_3.raw
High	A	2	SDEGQLSPATR	3587	Unambiguous	Plectin OS=Homo sapiens OX=9606 GN=PLEC PE=1 SV=3 - [PLEC_HUMAN]	1	1	Q15149		HCD	1	0	1	1	0	3.35e-13	110	136	2.7	0	17	47	16470000	2	580.781	1160.55	0	0.09	25.54	7341	7341	MS2	0/0	0	0	hela_waters_3.raw
High	A	2	ScYDLScHAR	3589	Unambiguous	Glycine--tRNA ligase OS=Homo sapiens OX=9606 GN=GARS PE=1 SV=3 - [GARS_HUMAN]	1	1	P41250	C2(Carbamidomethyl); C7(Carbamidomethyl)	HCD	1	0	1	1	0	6.24e-06	25	17	2.57	0	39	18	11220000	3	423.51	1268.52	0	0.68	25.54	7342	7342	MS2	0/0	0	0	hela_waters_3.raw
High	A	2	EEDcHSPTSKPPKPDQPLK	2986	Unambiguous	Eukaryotic translation initiation factor 4B OS=Homo sapiens OX=9606 GN=EIF4B PE=1 SV=2 - [IF4B_HUMAN]	1	1	P23588	C4(Carbamidomethyl)	HCD	1	0	1	1	0.001	0.00647	169	158	2.23	0	15	60	2339000	3	730.689	2190.05	0	0.64	25.54	7343	7343	MS2	0/0	0	0	hela_waters_3.raw
High	A	2	GQEcEYPPTQDGR	3593	Unambiguous	Methionine aminopeptidase 2 OS=Homo sapiens OX=9606 GN=METAP2 PE=1 SV=1 - [MAP2_HUMAN]	1	1	P50579	C4(Carbamidomethyl)	HCD	1	0	1	1	0	0.00215	26	23	1.78	0	0	60	2766000	2	768.823	1536.64	0	0.76	25.54	7344	7344	MS2	0/0	0	0	hela_waters_3.raw
High	A	2	ScYDLScHAR	3589	Unambiguous	Glycine--tRNA ligase OS=Homo sapiens OX=9606 GN=GARS PE=1 SV=3 - [GARS_HUMAN]	1	1	P41250	C2(Carbamidomethyl); C7(Carbamidomethyl)	HCD	1	0	1	1	0	5.83e-07	25	16	2.18	0	39	58	11390000	2	634.76	1268.51	0	-1.06	25.55	7346	7346	MS2	0/0	0	0	hela_waters_3.raw
High	A	2	FDDGAGGDNEVQR	3603	Unambiguous	26S proteasome regulatory subunit 7 OS=Homo sapiens OX=9606 GN=PSMC2 PE=1 SV=3 - [PRS7_HUMAN]	1	1	P35998		HCD	1	0	1	1	0	4.54e-12	19	24	2.61	0	49	60	6219000	2	690.292	1379.58	0	-3.78	25.55	7349	7349	MS2	0/0	0	0	hela_waters_3.raw
High	A	2	QRQEEPPPGPQRPDQSAAAAGPGDPK	3605	Unambiguous	Telomerase RNA component interacting RNase OS=Homo sapiens OX=9606 GN=TRIR PE=1 SV=1 - [TRIR_HUMAN]	1	1	Q9BQ61		HCD	1	0	1	1	0.006	0.0711	194	201	2.69	1	77	60	4477000	4	671.082	2681.31	0	1.04	25.55	7350	7350	MS2	0/0	0	0	hela_waters_3.raw
High	A	2	SITHDIEEK	3607	Unambiguous	Septin-9 OS=Homo sapiens OX=9606 GN=SEPT9 PE=1 SV=2 - [SEPT9_HUMAN]	1	1	Q9UHD8		HCD	1	0	1	1	0.001	0.0126	129	115	1.58	0	23	60	3076000	3	357.849	1071.53	0	0.67	25.55	7351	7351	MS2	0/0	0	0	hela_waters_3.raw
Middle	A	2	KNHEEEMNALR	3025	Unambiguous	Keratin, type I cytoskeletal 17 OS=Homo sapiens OX=9606 GN=KRT17 PE=1 SV=2 - [K1C17_HUMAN]	2	1	Q04695		HCD	1	0	1	1	0.023	0.323	101	106	1.49	1	49	43	8313000	3	457.554	1370.65	0	-1.18	25.56	7353	7353	MS2	0/0	0	0	hela_waters_3.raw
High	A	2	EDKYEEEIK	3558	Unambiguous	Tropomyosin alpha-3 chain OS=Homo sapiens OX=9606 GN=TPM3 PE=1 SV=2 - [TPM3_HUMAN]|Tropomyosin alpha-4 chain OS=Homo sapiens OX=9606 GN=TPM4 PE=1 SV=3 - [TPM4_HUMAN]|Tropomyosin beta chain OS=Homo sapiens OX=9606 GN=TPM2 PE=1 SV=1 - [TPM2_HUMAN]	3	3	P06753;P67936;P07951		HCD	1	0	1	1	0.004	0.0448	117	115	1.95	1	9	2	126400000	2	591.781	1182.55	0	1.67	25.57	7356	7356	MS2	0/0	0	0	hela_waters_3.raw
High	A	2	QDVDNASLAR	3615	Unambiguous	Vimentin OS=Homo sapiens OX=9606 GN=VIM PE=1 SV=4 - [VIME_HUMAN]	1	1	P08670		HCD	1	0	1	1	0	1.89e-12	145	151	2.86	0	20	4	72410000	2	544.771	1088.54	0	1.79	25.57	7357	7357	MS2	0/0	0	0	hela_waters_3.raw
High	A	2	HEQNIDcGGGYVK	3581	Unambiguous	Calreticulin OS=Homo sapiens OX=9606 GN=CALR PE=1 SV=1 - [CALR_HUMAN]	1	1	P27797	C7(Carbamidomethyl)	HCD	1	0	1	1	0	0.000166	63	64	2.69	0	6	6	62420000	3	492.89	1476.66	0	1.49	25.57	7358	7358	MS2	0/0	0	0	hela_waters_3.raw
High	A	2	EENIEDATEK	3619	Unambiguous	High mobility group nucleosome-binding domain-containing protein 5 OS=Homo sapiens OX=9606 GN=HMGN5 PE=1 SV=1 - [HMGN5_HUMAN]	1	1	P82970		HCD	1	0	1	1	0	2.07e-07	72	64	2.11	0	31	10	32980000	2	589.266	1177.52	0	2.23	25.57	7359	7359	MS2	0/0	0	0	hela_waters_3.raw
High	A	2	TTTAAAVASTGPSSR	3621	Unambiguous	Microtubule-associated protein 4 OS=Homo sapiens OX=9606 GN=MAP4 PE=1 SV=3 - [MAP4_HUMAN]	1	1	P27816		HCD	1	0	1	1	0	4.21e-16	221	225	3.23	0	19	17	21230000	2	689.354	1377.7	0	2.77	25.57	7360	7360	MS2	0/0	0	0	hela_waters_3.raw
Middle	A	2	GYDDRDYYSR	3623	Unambiguous	Transformer-2 protein homolog beta OS=Homo sapiens OX=9606 GN=TRA2B PE=1 SV=1 - [TRA2B_HUMAN]	1	1	P62995		HCD	1	0	1	1	0.028	0.374	32	28	2.09	1	30	41	18260000	2	655.276	1309.54	0	0.16	25.58	7361	7361	MS2	0/0	0	0	hela_waters_3.raw
High	A	2	LQDASAEVER	3625	Unambiguous	Bone marrow stromal antigen 2 OS=Homo sapiens OX=9606 GN=BST2 PE=1 SV=1 - [BST2_HUMAN]	1	1	Q10589		HCD	1	0	1	1	0	5.29e-14	148	153	2.38	0	52	15	15550000	2	559.279	1117.55	0	1.69	25.58	7362	7362	MS2	0/0	0	0	hela_waters_3.raw
High	A	2	RVHPVSTMIK	3627	Unambiguous	L-lactate dehydrogenase A chain OS=Homo sapiens OX=9606 GN=LDHA PE=1 SV=2 - [LDHA_HUMAN]	1	1	P00338		HCD	1	0	1	1	0	3.87e-11	93	97	3.94	1	15	29	7521000	3	389.894	1167.67	0	1.66	25.58	7363	7363	MS2	0/0	0	0	hela_waters_3.raw
High	A	2	SQYEQLAEQNRK	3633	Unambiguous	Keratin, type I cytoskeletal 10 OS=Homo sapiens OX=9606 GN=KRT10 PE=1 SV=6 - [K1C10_HUMAN]	1	1	P13645		HCD	1	0	1	1	0	2.84e-07	194	204	2.41	1	60	60	6576000	2	747.372	1493.74	0	1.04	25.58	7366	7366	MS2	0/0	0	0	hela_waters_3.raw
High	A	2	EHHFGSSGMTLHER	3635	Unambiguous	Thyroid hormone receptor-associated protein 3 OS=Homo sapiens OX=9606 GN=THRAP3 PE=1 SV=2 - [TR150_HUMAN]	1	1	Q9Y2W1		HCD	1	0	1	1	0	6.06e-16	68	78	2.39	0	23	38	5129000	4	406.938	1624.73	0	-0.17	25.58	7367	7367	MS2	0/0	0	0	hela_waters_3.raw
High	A	2	IIHEDGYSEEEcR	3637	Unambiguous	Guanine nucleotide-binding protein G(i) subunit alpha-2 OS=Homo sapiens OX=9606 GN=GNAI2 PE=1 SV=3 - [GNAI2_HUMAN]	1	1	P04899	C12(Carbamidomethyl)	HCD	1	0	1	1	0	4.21e-16	31	25	2.28	0	0	60	4969000	2	818.85	1636.69	0	1.42	25.58	7368	7368	MS2	0/0	0	0	hela_waters_3.raw
High	A	2	FRPPETTER	3639	Unambiguous	Importin-9 OS=Homo sapiens OX=9606 GN=IPO9 PE=1 SV=3 - [IPO9_HUMAN]	1	1	Q96P70		HCD	1	0	1	1	0	1.23e-05	221	234	2.15	0	18	60	3718000	3	378.197	1132.58	0	0.55	25.59	7369	7369	MS2	0/0	0	0	hela_waters_3.raw
High	A	2	RELHGQNPVVTPcNK	3198	Unambiguous	Cleavage and polyadenylation specificity factor subunit 6 OS=Homo sapiens OX=9606 GN=CPSF6 PE=1 SV=2 - [CPSF6_HUMAN]	1	1	Q16630	C13(Carbamidomethyl)	HCD	1	0	1	1	0.008	0.0944	219	235	2.49	1	85	60	3391000	3	583.634	1748.89	0	0.49	25.6	7379	7379	MS2	0/0	0	0	hela_waters_3.raw
High	A	2	DYGNSPLHR	3660	Unambiguous	Polypyrimidine tract-binding protein 1 OS=Homo sapiens OX=9606 GN=PTBP1 PE=1 SV=1 - [PTBP1_HUMAN]	1	1	P26599		HCD	1	0	1	1	0	9.08e-06	85	101	2.34	0	26	11	25020000	2	529.755	1058.5	0	2.17	25.61	7380	7380	MS2	0/0	0	0	hela_waters_3.raw
High	A	2	ANGTTVHVGIHPSK	3662	Unambiguous	60S ribosomal protein L26 OS=Homo sapiens OX=9606 GN=RPL26 PE=1 SV=1 - [RL26_HUMAN]	2	1	P61254		HCD	1	0	1	1	0	0.00349	252	239	1.85	0	57	11	16130000	3	473.256	1417.75	0	0.05	25.61	7381	7381	MS2	0/0	0	0	hela_waters_3.raw
High	A	2	KHEAFESDLAAHQDR	3664	Unambiguous	Alpha-actinin-1 OS=Homo sapiens OX=9606 GN=ACTN1 PE=1 SV=2 - [ACTN1_HUMAN]|Alpha-actinin-4 OS=Homo sapiens OX=9606 GN=ACTN4 PE=1 SV=2 - [ACTN4_HUMAN]|Alpha-actinin-2 OS=Homo sapiens OX=9606 GN=ACTN2 PE=1 SV=1 - [ACTN2_HUMAN]	3	2	P12814;O43707		HCD	1	0	1	1	0	4.28e-16	134	137	3.41	1	38	14	14350000	4	439.212	1753.83	0	1.34	25.61	7382	7382	MS2	0/0	0	0	hela_waters_3.raw
Middle	A	2	MGPSGGEGMEPERR	3674	Unambiguous	LIM and SH3 domain protein 1 OS=Homo sapiens OX=9606 GN=LASP1 PE=1 SV=2 - [LASP1_HUMAN]	1	1	Q14847		HCD	1	0	1	1	0.045	0.623	61	59	2.35	1	28	20	14090000	3	497.223	1489.65	0	0.6	25.62	7387	7387	MS2	0/0	0	0	hela_waters_3.raw
High	A	2	AYGELPEHAK	3670	Unambiguous	Eukaryotic translation initiation factor 1A, Y-chromosomal OS=Homo sapiens OX=9606 GN=EIF1AY PE=1 SV=4 - [IF1AY_HUMAN]	2	1	O14602		HCD	1	0	1	1	0	0.0047	122	137	1.53	0	68	15	10550000	2	557.78	1114.55	0	0.43	25.62	7388	7388	MS2	0/0	0	0	hela_waters_3.raw
High	A	2	NADHSMNYQYR	3682	Unambiguous	Interleukin enhancer-binding factor 3 OS=Homo sapiens OX=9606 GN=ILF3 PE=1 SV=3 - [ILF3_HUMAN]	1	1	Q12906		HCD	1	0	1	1	0.001	0.00654	27	28	1.39	0	49	60	2572000	2	699.798	1398.59	0	2.49	25.62	7391	7391	MS2	0/0	0	0	hela_waters_3.raw
High	A	2	SVSTPSEAGSQDSGDGAVGSR	3686	Unambiguous	Cytoplasmic dynein 1 intermediate chain 2 OS=Homo sapiens OX=9606 GN=DYNC1I2 PE=1 SV=3 - [DC1I2_HUMAN]	1	1	Q13409		HCD	1	0	1	1	0	4.21e-16	78	87	3.09	0	0	60	4363000	2	975.938	1950.87	0	2.97	25.63	7394	7394	MS2	0/0	0	0	hela_waters_3.raw
High	A	2	MMNGGHYTYSENR	3688	Unambiguous	Protein/nucleic acid deglycase DJ-1 OS=Homo sapiens OX=9606 GN=PARK7 PE=1 SV=2 - [PARK7_HUMAN]	1	1	Q99497		HCD	1	0	1	1	0	6.17e-07	19	17	1.6	0	33	8	42830000	3	520.551	1559.64	0	1.1	25.63	7396	7396	MS2	0/0	0	0	hela_waters_3.raw
High	A	2	LTQDQDVDVK	3690	Unambiguous	Serine/threonine-protein phosphatase 2A 65 kDa regulatory subunit A alpha isoform OS=Homo sapiens OX=9606 GN=PPP2R1A PE=1 SV=4 - [2AAA_HUMAN]	1	1	P30153		HCD	1	0	1	1	0	1.43e-05	258	222	2.27	0	27	9	27780000	2	580.796	1160.58	0	4.09	25.63	7397	7397	MS2	0/0	0	0	hela_waters_3.raw
High	A	2	LQAEEVAQQK	3692	Unambiguous	Plectin OS=Homo sapiens OX=9606 GN=PLEC PE=1 SV=3 - [PLEC_HUMAN]	1	1	Q15149		HCD	1	0	1	1	0	1.54e-06	187	204	1.99	0	22	21	17590000	2	572.305	1143.6	0	1.41	25.63	7398	7398	MS2	0/0	0	0	hela_waters_3.raw
High	A	2	YELGRPAANTK	3696	Unambiguous	40S ribosomal protein S8 OS=Homo sapiens OX=9606 GN=RPS8 PE=1 SV=2 - [RS8_HUMAN]	1	1	P62241		HCD	1	0	1	1	0	3.36e-05	226	221	2.71	0	25	13	15650000	2	610.328	1219.65	0	5.29	25.64	7400	7400	MS2	0/0	0	0	hela_waters_3.raw
High	A	2	VSSDNVADLHEK	3700	Unambiguous	Proteasome subunit beta type-5 OS=Homo sapiens OX=9606 GN=PSMB5 PE=1 SV=3 - [PSB5_HUMAN]	1	1	P28074		HCD	1	0	1	1	0	4.21e-16	143	147	2.56	0	42	60	8470000	2	657.322	1313.64	0	1.94	25.64	7402	7402	MS2	0/0	0	0	hela_waters_3.raw
High	A	2	DAPQDFHPDR	3702	Unambiguous	Filamin-A OS=Homo sapiens OX=9606 GN=FLNA PE=1 SV=4 - [FLNA_HUMAN]	1	1	P21333		HCD	1	0	1	1	0	2.85e-10	62	52	2.44	0	21	35	7799000	3	399.848	1197.53	0	0.95	25.64	7403	7403	MS2	0/0	0	0	hela_waters_3.raw
High	A	2	GcPVNTEPSGPTcEK	3704	Unambiguous	Cytochrome c-type heme lyase OS=Homo sapiens OX=9606 GN=HCCS PE=1 SV=1 - [CCHL_HUMAN]	1	1	P53701	C2(Carbamidomethyl); C13(Carbamidomethyl)	HCD	1	0	1	1	0	3.53e-15	36	29	2.6	0	39	58	7673000	2	816.853	1632.7	0	-0.85	25.64	7404	7404	MS2	0/0	0	0	hela_waters_3.raw
High	A	2	STVNcSTTPVAER	3706	Unambiguous	Nuclear pore complex protein Nup88 OS=Homo sapiens OX=9606 GN=NUP88 PE=1 SV=2 - [NUP88_HUMAN]	1	1	Q99567	C5(Carbamidomethyl)	HCD	1	0	1	1	0	4.21e-16	134	130	2.89	0	18	60	6416000	2	711.339	1421.67	0	0.96	25.64	7405	7405	MS2	0/0	0	0	hela_waters_3.raw
High	A	2	YEPAAVSEQGDK	3712	Unambiguous	Sodium/potassium-transporting ATPase subunit alpha-1 OS=Homo sapiens OX=9606 GN=ATP1A1 PE=1 SV=1 - [AT1A1_HUMAN]	1	1	P05023		HCD	1	0	1	1	0	4.3e-12	96	107	1.9	0	63	24	10200000	2	647.302	1293.6	0	1.1	25.65	7408	7408	MS2	0/0	0	0	hela_waters_3.raw
High	A	2	RAESMLQQADK	3718	Unambiguous	Plastin-3 OS=Homo sapiens OX=9606 GN=PLS3 PE=1 SV=4 - [PLST_HUMAN]	1	1	P13797		HCD	1	0	1	1	0	0.00301	184	191	3.41	1	31	60	6930000	2	638.82	1276.63	0	1.56	25.65	7411	7411	MS2	0/0	0	0	hela_waters_3.raw
High	A	2	LAGESESNLR	3728	Unambiguous	Transitional endoplasmic reticulum ATPase OS=Homo sapiens OX=9606 GN=VCP PE=1 SV=4 - [TERA_HUMAN]	1	1	P55072		HCD	1	0	1	1	0	1.29e-12	213	189	2.29	0	27	7	41470000	2	538.274	1075.54	0	2.73	25.66	7417	7417	MS2	0/0	0	0	hela_waters_3.raw
High	A	2	YELGRPAANTK	3696	Unambiguous	40S ribosomal protein S8 OS=Homo sapiens OX=9606 GN=RPS8 PE=1 SV=2 - [RS8_HUMAN]	1	1	P62241		HCD	1	0	1	1	0.009	0.112	254	247	1.59	0	24	7	33930000	3	407.22	1219.64	0	0.95	25.67	7418	7418	MS2	0/0	0	0	hela_waters_3.raw
High	A	2	MDcQETPEGYK	3732	Unambiguous	Filamin-B OS=Homo sapiens OX=9606 GN=FLNB PE=1 SV=2 - [FLNB_HUMAN]	1	1	O75369	C3(Carbamidomethyl)	HCD	1	0	1	1	0	1.69e-10	10	12	2.23	0	44	15	26380000	2	679.274	1357.54	0	1.28	25.67	7419	7419	MS2	0/0	0	0	hela_waters_3.raw
High	A	2	EDSVKPGAHLTVK	3736	Unambiguous	Heterogeneous nuclear ribonucleoprotein A3 OS=Homo sapiens OX=9606 GN=HNRNPA3 PE=1 SV=2 - [ROA3_HUMAN]	1	1	P51991		HCD	1	0	1	1	0.007	0.0784	171	181	2.21	0	15	12	16140000	3	460.922	1380.75	0	1.6	25.67	7421	7421	MS2	0/0	0	0	hela_waters_3.raw
High	A	2	VNEIVETNRPDSK	3738	Unambiguous	26S proteasome non-ATPase regulatory subunit 6 OS=Homo sapiens OX=9606 GN=PSMD6 PE=1 SV=1 - [PSMD6_HUMAN]	1	1	Q15008		HCD	1	0	1	1	0.001	0.012	192	211	2.66	0	29	18	14110000	3	500.927	1500.77	0	0.87	25.67	7422	7422	MS2	0/0	0	0	hela_waters_3.raw
High	A	2	RDLMAcAQTGSGK	3740	Unambiguous	ATP-dependent RNA helicase DDX3X OS=Homo sapiens OX=9606 GN=DDX3X PE=1 SV=3 - [DDX3X_HUMAN]	2	1	O00571	C6(Carbamidomethyl)	HCD	1	0	1	1	0	4.21e-16	123	123	4.09	1	38	51	10930000	2	697.832	1394.66	0	3.12	25.67	7423	7423	MS2	0/0	0	0	hela_waters_3.raw
High	A	2	IEYNDQNDGScDVK	3744	Unambiguous	Filamin-B OS=Homo sapiens OX=9606 GN=FLNB PE=1 SV=2 - [FLNB_HUMAN]	1	1	O75369	C11(Carbamidomethyl)	HCD	1	0	1	1	0	4.21e-16	17	24	2.56	0	57	60	5772000	2	828.845	1656.68	0	1.21	25.68	7425	7425	MS2	0/0	0	0	hela_waters_3.raw
High	A	2	VMQQQQQTTQQQLPQK	3746	Unambiguous	Splicing factor 3A subunit 1 OS=Homo sapiens OX=9606 GN=SF3A1 PE=1 SV=1 - [SF3A1_HUMAN]	1	1	Q15459		HCD	1	0	1	1	0	1.76e-08	201	195	2.58	0	0	60	4695000	2	971.494	1941.98	0	-0.58	25.68	7426	7426	MS2	0/0	0	0	hela_waters_3.raw
High	A	2	ITPAHDQNDYEVGQR	3748	Unambiguous	Valine--tRNA ligase OS=Homo sapiens OX=9606 GN=VARS PE=1 SV=4 - [SYVC_HUMAN]	1	1	P26640		HCD	1	0	1	1	0	4.21e-16	125	121	2.41	0	14	60	4043000	2	871.909	1742.81	0	0.74	25.68	7427	7427	MS2	0/0	0	0	hela_waters_3.raw
High	A	2	KPMVLGHEASGTVEK	3750	Unambiguous	Sorbitol dehydrogenase OS=Homo sapiens OX=9606 GN=SORD PE=1 SV=4 - [DHSO_HUMAN]	1	1	Q00796		HCD	1	0	1	1	0	4.21e-16	170	162	3.06	0	63	60	3099000	2	791.918	1582.83	0	1.55	25.68	7428	7428	MS2	0/0	0	0	hela_waters_3.raw
High	A	2	AAQQQEEQEEKEEEDDEQTLHR	3752	Unambiguous	Immunoglobulin-binding protein 1 OS=Homo sapiens OX=9606 GN=IGBP1 PE=1 SV=1 - [IGBP1_HUMAN]	1	1	P78318		HCD	1	0	1	1	0	8e-15	34	35	2.94	1	0	59	4137000	4	675.548	2699.17	0	0.71	25.68	7429	7429	MS2	0/0	0	0	hela_waters_3.raw
High	A	2	SVSTPSEAGSQDSGDGAVGSR	3686	Unambiguous	Cytoplasmic dynein 1 intermediate chain 2 OS=Homo sapiens OX=9606 GN=DYNC1I2 PE=1 SV=3 - [DC1I2_HUMAN]	1	1	Q13409		HCD	1	0	1	1	0	4.21e-16	73	80	2.96	0	33	60	4693000	2	975.936	1950.86	0	0.22	25.68	7430	7430	MS2	0/0	0	0	hela_waters_3.raw
High	A	2	SAGLPSHSSVISQHSK	3756	Unambiguous	28S ribosomal protein S36, mitochondrial OS=Homo sapiens OX=9606 GN=MRPS36 PE=1 SV=2 - [RT36_HUMAN]	1	1	P82909		HCD	1	0	1	1	0	0.00338	238	242	1.9	0	77	32	3972000	3	541.283	1621.83	0	2.98	25.69	7431	7431	MS2	0/0	0	0	hela_waters_3.raw
High	A	2	FEPPQSDSDGQR	3758	Unambiguous	U2 snRNP-associated SURP motif-containing protein OS=Homo sapiens OX=9606 GN=U2SURP PE=1 SV=2 - [SR140_HUMAN]	1	1	O15042		HCD	1	0	1	1	0	3.69e-06	47	36	1.93	0	65	60	3273000	2	681.798	1362.59	0	-3.06	25.69	7432	7432	MS2	0/0	0	0	hela_waters_3.raw
High	A	2	cEMEQQNQEYK	1921	Unambiguous	Keratin, type I cytoskeletal 17 OS=Homo sapiens OX=9606 GN=KRT17 PE=1 SV=2 - [K1C17_HUMAN]	2	1	Q04695	C1(Carbamidomethyl)	HCD	1	0	1	1	0	2.05e-12	10	19	3.2	0	16	35	20330000	2	743.801	1486.59	0	0.69	25.7	7436	7436	MS2	0/0	0	0	hela_waters_3.raw
High	A	2	EVYQQQQYGSGGR	3156	Unambiguous	Heterogeneous nuclear ribonucleoprotein A/B OS=Homo sapiens OX=9606 GN=HNRNPAB PE=1 SV=2 - [ROAA_HUMAN]	1	1	Q99729		HCD	1	0	1	1	0	7.92e-13	107	110	2.47	0	43	46	9906000	2	750.348	1499.69	0	1.49	25.7	7437	7437	MS2	0/0	0	0	hela_waters_3.raw
High	A	2	NHEEEMNALR	1837	Unambiguous	Keratin, type I cytoskeletal 17 OS=Homo sapiens OX=9606 GN=KRT17 PE=1 SV=2 - [K1C17_HUMAN]	2	1	Q04695		HCD	1	0	1	1	0	2.21e-08	53	45	2.47	0	3	5	90770000	2	621.781	1242.55	0	0.83	25.7	7438	7438	MS2	0/0	0	0	hela_waters_3.raw
High	A	2	MDSTEPPYSQK	3772	Unambiguous	Elongation factor 1-alpha 1 OS=Homo sapiens OX=9606 GN=EEF1A1 PE=1 SV=1 - [EF1A1_HUMAN]	2	1	P68104		HCD	1	0	1	1	0.002	0.0244	69	56	1.7	0	36	49	12150000	2	641.785	1282.56	0	0.78	25.7	7440	7440	MS2	0/0	0	0	hela_waters_3.raw
Middle	A	2	NHEEEMNALR	1837	Unambiguous	Keratin, type I cytoskeletal 17 OS=Homo sapiens OX=9606 GN=KRT17 PE=1 SV=2 - [K1C17_HUMAN]	2	1	Q04695		HCD	1	0	1	1	0.021	0.277	51	43	2.36	0	11	23	10770000	3	414.856	1242.55	0	1.11	25.7	7441	7441	MS2	0/0	0	0	hela_waters_3.raw
High	A	2	AHLTNQYMQR	3776	Unambiguous	Polyadenylate-binding protein 4 OS=Homo sapiens OX=9606 GN=PABPC4 PE=1 SV=1 - [PABP4_HUMAN]	1	1	Q13310		HCD	1	0	1	1	0.007	0.076	148	151	1.97	0	16	30	8258000	3	421.208	1261.61	0	0.01	25.7	7442	7442	MS2	0/0	0	0	hela_waters_3.raw
High	A	2	AMNGESLDGR	3778	Unambiguous	RNA-binding protein 3 OS=Homo sapiens OX=9606 GN=RBM3 PE=1 SV=1 - [RBM3_HUMAN]	1	1	P98179		HCD	1	0	1	1	0	3e-06	62	64	2.05	0	34	25	6139000	2	525.236	1049.46	0	-3.06	25.7	7443	7443	MS2	0/0	0	0	hela_waters_3.raw
Middle	A	2	RFDGVQDPR	3780	Unambiguous	Membrane-associated progesterone receptor component 1 OS=Homo sapiens OX=9606 GN=PGRMC1 PE=1 SV=3 - [PGRC1_HUMAN]	1	1	O00264		HCD	1	0	1	1	0.042	0.576	203	197	1.82	1	17	60	3991000	3	363.853	1089.54	0	0.98	25.71	7444	7444	MS2	0/0	0	0	hela_waters_3.raw
High	A	2	TQASSSFQDSSQPAGK	3146	Unambiguous	Probable 28S rRNA (cytosine(4447)-C(5))-methyltransferase OS=Homo sapiens OX=9606 GN=NOP2 PE=1 SV=2 - [NOP2_HUMAN]	1	1	P46087		HCD	1	0	1	1	0.001	0.00957	80	90	1.22	0	17	60	2773000	2	813.371	1625.73	0	-3.27	25.71	7446	7446	MS2	0/0	0	0	hela_waters_3.raw
High	A	2	AEQFYcGDTEGKK	3786	Unambiguous	2-oxoglutarate dehydrogenase, mitochondrial OS=Homo sapiens OX=9606 GN=OGDH PE=1 SV=3 - [ODO1_HUMAN]	1	1	Q02218	C6(Carbamidomethyl)	HCD	1	0	1	1	0.002	0.0205	55	51	1.68	1	0	60	1835000	2	766.839	1532.67	0	1.58	25.71	7447	7447	MS2	0/0	0	0	hela_waters_3.raw
High	A	2	VDcTAHSDVcSAQGVR	3160	Unambiguous	Thioredoxin domain-containing protein 5 OS=Homo sapiens OX=9606 GN=TXNDC5 PE=1 SV=2 - [TXND5_HUMAN]	1	1	Q8NBS9	C3(Carbamidomethyl); C10(Carbamidomethyl)	HCD	1	0	1	1	0	1.57e-09	43	41	1.73	0	50	60	1576000	2	881.388	1761.77	0	1.99	25.71	7448	7448	MS2	0/0	0	0	hela_waters_3.raw
High	A	2	VRVELSNGEK	3794	Unambiguous	Serine/arginine-rich splicing factor 3 OS=Homo sapiens OX=9606 GN=SRSF3 PE=1 SV=1 - [SRSF3_HUMAN]	1	1	P84103		HCD	1	0	1	1	0.002	0.0155	245	264	2.76	1	41	60	4018000	3	377.544	1130.62	0	0.8	25.72	7451	7451	MS2	0/0	0	0	hela_waters_3.raw
High	A	2	YFDGSGGNNHAVEHYR	3796	Unambiguous	Ubiquitin carboxyl-terminal hydrolase 5 OS=Homo sapiens OX=9606 GN=USP5 PE=1 SV=2 - [UBP5_HUMAN]	1	1	P45974		HCD	1	0	1	1	0	3.99e-07	57	61	1.88	0	0	60	2732000	2	911.898	1822.79	0	-0.33	25.72	7452	7452	MS2	0/0	0	0	hela_waters_3.raw
High	A	2	ETPAATEAPSSTPK	3188	Unambiguous	Brain acid soluble protein 1 OS=Homo sapiens OX=9606 GN=BASP1 PE=1 SV=2 - [BASP1_HUMAN]	1	1	P80723		HCD	1	0	1	1	0	4.21e-16	152	145	2.72	0	11	9	40710000	2	693.842	1386.68	0	1.46	25.73	7456	7456	MS2	0/0	0	0	hela_waters_3.raw
High	A	2	NQGGYGGSSSSSSYGSGR	2114	Unambiguous	Heterogeneous nuclear ribonucleoprotein A1 OS=Homo sapiens OX=9606 GN=HNRNPA1 PE=1 SV=5 - [ROA1_HUMAN]	1	1	P09651		HCD	1	0	1	1	0	4.21e-16	15	15	4.27	0	18	52	10400000	2	847.855	1694.7	0	1.28	25.73	7457	7457	MS2	0/0	0	0	hela_waters_3.raw
High	A	2	ETMQSLNDR	3808	Unambiguous	Keratin, type I cytoskeletal 18 OS=Homo sapiens OX=9606 GN=KRT18 PE=1 SV=2 - [K1C18_HUMAN]	2	1	P05783		HCD	1	0	1	1	0	8.77e-08	63	53	2.17	0	28	3	67110000	2	547.251	1093.49	0	-0.1	25.73	7459	7459	MS2	0/0	0	0	hela_waters_3.raw
High	A	2	HLPDNEcIEK	3812	Unambiguous	Arginine--tRNA ligase, cytoplasmic OS=Homo sapiens OX=9606 GN=RARS PE=1 SV=2 - [SYRC_HUMAN]	1	1	P54136	C7(Carbamidomethyl)	HCD	1	0	1	1	0	4.8e-10	104	106	2.07	0	30	40	18500000	2	627.793	1254.58	0	-0.15	25.73	7461	7461	MS2	0/0	0	0	hela_waters_3.raw
High	A	2	ETGERPSNEEIMR	3826	Unambiguous	Mitochondrial proton/calcium exchanger protein OS=Homo sapiens OX=9606 GN=LETM1 PE=1 SV=1 - [LETM1_HUMAN]	1	1	O95202		HCD	1	0	1	1	0	3.65e-08	109	92	2.68	0	29	60	4015000	2	774.36	1547.71	0	0.89	25.75	7470	7470	MS2	0/0	0	0	hela_waters_3.raw
High	A	2	SEENEEPMETDQNAK	3239	Unambiguous	Heat shock 70 kDa protein 4 OS=Homo sapiens OX=9606 GN=HSPA4 PE=1 SV=4 - [HSP74_HUMAN]	1	1	P34932		HCD	1	0	1	1	0	4.35e-12	17	16	2.36	0	0	60	1784000	2	875.858	1750.71	0	0.36	25.75	7471	7471	MS2	0/0	0	0	hela_waters_3.raw
High	A	2	ISSSSFSR	3830	Unambiguous	Keratin, type II cytoskeletal 8 OS=Homo sapiens OX=9606 GN=KRT8 PE=1 SV=7 - [K2C8_HUMAN]	1	1	P05787		HCD	1	0	1	1	0	1.15e-05	106	117	2.06	0	13	4	60420000	2	435.72	870.433	0	1.57	25.76	7473	7473	MS2	0/0	0	0	hela_waters_3.raw
High	A	2	IFAQDGEGQR	3832	Unambiguous	Filamin-B OS=Homo sapiens OX=9606 GN=FLNB PE=1 SV=2 - [FLNB_HUMAN]	1	1	O75369		HCD	1	0	1	1	0	4.23e-11	162	151	2.29	0	22	4	41670000	2	560.773	1120.54	0	0.9	25.76	7474	7474	MS2	0/0	0	0	hela_waters_3.raw
High	A	2	SYSSGGEDGYVR	3834	Unambiguous	Eukaryotic translation initiation factor 3 subunit I OS=Homo sapiens OX=9606 GN=EIF3I PE=1 SV=1 - [EIF3I_HUMAN]	1	1	Q13347		HCD	1	0	1	1	0	8.53e-13	28	26	1.89	0	61	17	12960000	2	638.776	1276.54	0	0.51	25.76	7475	7475	MS2	0/0	0	0	hela_waters_3.raw
High	A	2	DENQSINHQMAQEDAQR	3844	Unambiguous	Annexin A7 OS=Homo sapiens OX=9606 GN=ANXA7 PE=1 SV=3 - [ANXA7_HUMAN]	1	1	P20073		HCD	1	0	1	1	0	4.21e-16	36	31	3.46	0	13	60	3840000	3	671.96	2013.87	0	-0.87	25.77	7480	7480	MS2	0/0	0	0	hela_waters_3.raw
High	A	2	RAGELTEDEVER	3846	Unambiguous	40S ribosomal protein S18 OS=Homo sapiens OX=9606 GN=RPS18 PE=1 SV=3 - [RS18_HUMAN]	1	1	P62269		HCD	1	0	1	1	0	4.21e-16	145	133	4.38	1	24	37	19270000	2	702.342	1403.68	0	0.79	25.77	7481	7481	MS2	0/0	0	0	hela_waters_3.raw
High	A	2	AVAHHTDcTFIR	3849	Unambiguous	26S proteasome regulatory subunit 8 OS=Homo sapiens OX=9606 GN=PSMC5 PE=1 SV=1 - [PRS8_HUMAN]	1	1	P62195	C8(Carbamidomethyl)	HCD	1	0	1	2	0	2.83e-05	124	119	1.67	0	43	24	10690000	3	476.567	1427.69	0	1.44	25.77	7482	7482	MS2	0/0	0	0	hela_waters_3.raw
High	A	2	TTHFVEGGDAGNREDQINR	3854	Unambiguous	60S ribosomal protein L7 OS=Homo sapiens OX=9606 GN=RPL7 PE=1 SV=1 - [RL7_HUMAN]	1	1	P18124		HCD	1	0	1	1	0	5.38e-06	118	127	2.63	1	0	60	4210000	2	1058.5	2115.99	0	4.59	25.78	7485	7485	MS2	0/0	0	0	hela_waters_3.raw
High	A	2	RKPDTIEVQQMK	3863	Unambiguous	Ezrin OS=Homo sapiens OX=9606 GN=EZR PE=1 SV=4 - [EZRI_HUMAN]|Moesin OS=Homo sapiens OX=9606 GN=MSN PE=1 SV=3 - [MOES_HUMAN]|Radixin OS=Homo sapiens OX=9606 GN=RDX PE=1 SV=1 - [RADI_HUMAN]	3	3	P15311;P26038;P35241		HCD	1	0	1	1	0	1.33e-07	171	200	2.48	1	28	5	57580000	3	491.602	1472.79	0	0.67	25.79	7490	7490	MS2	0/0	0	0	hela_waters_3.raw
High	A	2	HLIPAANTGESK	3865	Unambiguous	14-3-3 protein epsilon OS=Homo sapiens OX=9606 GN=YWHAE PE=1 SV=1 - [1433E_HUMAN]	1	1	P62258		HCD	1	0	1	1	0	2.27e-09	169	179	2.04	0	15	9	43770000	2	619.331	1237.65	0	1.01	25.79	7491	7491	MS2	0/0	0	0	hela_waters_3.raw
High	A	2	HSGPNSADSANDGFVR	3869	Unambiguous	Heterogeneous nuclear ribonucleoprotein F OS=Homo sapiens OX=9606 GN=HNRNPF PE=1 SV=3 - [HNRPF_HUMAN]	1	1	P52597		HCD	1	0	1	1	0	4.21e-16	55	60	4.05	0	0	36	19870000	2	815.865	1630.72	0	0.97	25.79	7493	7493	MS2	0/0	0	0	hela_waters_3.raw
Middle	A	2	LVEPGSPAEK	3875	Unambiguous	Na(+)/H(+) exchange regulatory cofactor NHE-RF1 OS=Homo sapiens OX=9606 GN=SLC9A3R1 PE=1 SV=4 - [NHRF1_HUMAN]	1	1	O14745		HCD	1	0	1	1	0.034	0.443	144	153	1.47	0	42	13	12030000	2	513.773	1026.54	0	-7.36	25.79	7496	7496	MS2	0/0	0	0	hela_waters_3.raw
High	A	2	DNTNEIYSGK	3877	Unambiguous	Integrin beta-1 OS=Homo sapiens OX=9606 GN=ITGB1 PE=1 SV=2 - [ITB1_HUMAN]	1	1	P05556		HCD	1	0	1	1	0	4.63e-06	96	70	1.9	0	34	60	7882000	2	570.763	1140.52	0	2.44	25.8	7497	7497	MS2	0/0	0	0	hela_waters_3.raw
High	A	2	LEcVEPNcR	3904	Unambiguous	60S ribosomal protein L36a OS=Homo sapiens OX=9606 GN=RPL36A PE=1 SV=2 - [RL36A_HUMAN]	2	1	P83881	C3(Carbamidomethyl); C8(Carbamidomethyl)	HCD	1	0	1	1	0	4.6e-10	40	42	2.26	0	19	5	48210000	2	588.761	1176.52	0	1.19	25.82	7511	7511	MS2	0/0	0	0	hela_waters_3.raw
High	A	2	MDcQEcPEGYR	3906	Unambiguous	Filamin-A OS=Homo sapiens OX=9606 GN=FLNA PE=1 SV=4 - [FLNA_HUMAN]	1	1	P21333	C3(Carbamidomethyl); C6(Carbamidomethyl)	HCD	1	0	1	1	0	4.41e-15	4	4	2.7	0	6	12	36850000	2	722.769	1444.53	0	0.87	25.82	7512	7512	MS2	0/0	0	0	hela_waters_3.raw
High	A	2	MGPGAASGGERPNLK	3908	Unambiguous	Ras-related protein Rab-1B OS=Homo sapiens OX=9606 GN=RAB1B PE=1 SV=1 - [RAB1B_HUMAN]	1	1	Q9H0U4		HCD	1	0	1	1	0	8.92e-11	173	154	3.05	0	27	11	24910000	3	481.246	1441.72	0	1.07	25.82	7513	7513	MS2	0/0	0	0	hela_waters_3.raw
High	A	2	DGGAWGTEQR	3910	Unambiguous	Galectin-1 OS=Homo sapiens OX=9606 GN=LGALS1 PE=1 SV=2 - [LEG1_HUMAN]	1	1	P09382		HCD	1	0	1	1	0	3.31e-09	49	48	2.29	0	55	5	24860000	2	538.742	1076.48	0	1.26	25.82	7514	7514	MS2	0/0	0	0	hela_waters_3.raw
High	A	2	SLAAEEEAAR	3912	Unambiguous	Plectin OS=Homo sapiens OX=9606 GN=PLEC PE=1 SV=3 - [PLEC_HUMAN]	1	1	Q15149		HCD	1	0	1	1	0	3.72e-08	130	116	1.84	0	52	14	14450000	2	523.759	1046.51	0	0.17	25.82	7515	7515	MS2	0/0	0	0	hela_waters_3.raw
High	A	2	AQELGHSQSALASAQR	3914	Unambiguous	Nuclear mitotic apparatus protein 1 OS=Homo sapiens OX=9606 GN=NUMA1 PE=1 SV=2 - [NUMA1_HUMAN]	1	1	Q14980		HCD	1	0	1	1	0	1.21e-09	199	206	2.33	0	27	28	7465000	3	551.949	1653.83	0	1.53	25.83	7516	7516	MS2	0/0	0	0	hela_waters_3.raw
High	A	2	FcDNSSAIQGK	3918	Unambiguous	Phosphoribosylformylglycinamidine synthase OS=Homo sapiens OX=9606 GN=PFAS PE=1 SV=4 - [PUR4_HUMAN]	1	1	O15067	C2(Carbamidomethyl)	HCD	1	0	1	1	0	1.4e-08	79	57	1.98	0	32	26	14950000	2	613.779	1226.55	0	2.57	25.83	7518	7518	MS2	0/0	0	0	hela_waters_3.raw
High	A	2	ADSAVSQEQLR	3920	Unambiguous	Protein kinase C and casein kinase substrate in neurons protein 3 OS=Homo sapiens OX=9606 GN=PACSIN3 PE=1 SV=2 - [PACN3_HUMAN]	1	1	Q9UKS6		HCD	1	0	1	1	0	8.77e-07	193	208	1.84	0	68	12	13810000	2	602.302	1203.6	0	0.32	25.83	7519	7519	MS2	0/0	0	0	hela_waters_3.raw
High	A	2	DKPHVNVGTIGHVDHGK	3924	Unambiguous	Elongation factor Tu, mitochondrial OS=Homo sapiens OX=9606 GN=TUFM PE=1 SV=2 - [EFTU_HUMAN]	1	1	P49411		HCD	1	0	1	1	0	4.21e-16	205	197	2.02	0	19	60	3072000	5	362.793	1809.94	0	1.04	25.83	7521	7521	MS2	0/0	0	0	hela_waters_3.raw
Middle	A	2	AIHNIcSVcR	3928	Unambiguous	Transportin-3 OS=Homo sapiens OX=9606 GN=TNPO3 PE=1 SV=3 - [TNPO3_HUMAN]	1	1	Q9Y5L0	C6(Carbamidomethyl); C9(Carbamidomethyl)	HCD	1	0	1	1	0.028	0.369	111	121	1.31	0	65	60	3234000	3	410.533	1229.59	0	-1.65	25.84	7523	7523	MS2	0/0	0	0	hela_waters_3.raw
High	A	2	DSYVGDEAQSK	2761	Unambiguous	Actin, alpha cardiac muscle 1 OS=Homo sapiens OX=9606 GN=ACTC1 PE=1 SV=1 - [ACTC_HUMAN]|Actin, cytoplasmic 1 OS=Homo sapiens OX=9606 GN=ACTB PE=1 SV=1 - [ACTB_HUMAN]	6	2	P68032;P60709		HCD	1	0	1	1	0	1.55e-06	61	56	1.59	0	31	3	80340000	2	599.766	1198.52	0	1.31	25.84	7525	7525	MS2	0/0	0	0	hela_waters_3.raw
High	A	2	EVVEEAENGR	3057	Unambiguous	Prothymosin alpha OS=Homo sapiens OX=9606 GN=PTMA PE=1 SV=2 - [PTMA_HUMAN]	1	1	P06454		HCD	1	0	1	1	0	1.61e-10	99	106	2.31	0	53	4	30320000	2	566.268	1131.53	0	0.46	25.84	7526	7526	MS2	0/0	0	0	hela_waters_3.raw
High	A	2	AGFAGDDAPR	3936	Unambiguous	Actin, alpha cardiac muscle 1 OS=Homo sapiens OX=9606 GN=ACTC1 PE=1 SV=1 - [ACTC_HUMAN]|Actin, cytoplasmic 1 OS=Homo sapiens OX=9606 GN=ACTB PE=1 SV=1 - [ACTB_HUMAN]	10	2	P68032;P60709		HCD	1	0	1	1	0	2.29e-09	74	86	1.68	0	2	0	618300000	2	488.729	976.45	0	2.12	25.85	7529	7529	MS2	0/0	0	0	hela_waters_3.raw
High	A	2	VAQPTITDNK	3938	Unambiguous	Filamin-A OS=Homo sapiens OX=9606 GN=FLNA PE=1 SV=4 - [FLNA_HUMAN]	1	1	P21333		HCD	1	0	1	1	0	9.82e-06	220	196	1.81	0	49	6	30630000	2	543.794	1086.58	0	1.81	25.85	7530	7530	MS2	0/0	0	0	hela_waters_3.raw
High	A	2	YTcSFcGK	3942	Unambiguous	60S ribosomal protein L37a OS=Homo sapiens OX=9606 GN=RPL37A PE=1 SV=2 - [RL37A_HUMAN]	2	1	P61513	C3(Carbamidomethyl); C6(Carbamidomethyl)	HCD	1	0	1	1	0.001	0.00624	18	9	1.67	0	30	33	24460000	2	511.708	1022.41	0	1.42	25.86	7532	7532	MS2	0/0	0	0	hela_waters_3.raw
High	A	2	TVLDQQQTPSR	3944	Unambiguous	Leucine-rich PPR motif-containing protein, mitochondrial OS=Homo sapiens OX=9606 GN=LRPPRC PE=1 SV=3 - [LPPRC_HUMAN]	1	1	P42704		HCD	1	0	1	1	0	1.06e-12	209	194	2.58	0	23	18	22180000	2	636.831	1272.65	0	0.23	25.86	7533	7533	MS2	0/0	0	0	hela_waters_3.raw
High	A	2	SYVDPSTDER	3946	Unambiguous	Plectin OS=Homo sapiens OX=9606 GN=PLEC PE=1 SV=3 - [PLEC_HUMAN]	1	1	Q15149		HCD	1	0	1	1	0	1.05e-06	60	52	2	0	30	43	15770000	2	584.76	1168.51	0	1.3	25.86	7534	7534	MS2	0/0	0	0	hela_waters_3.raw
Middle	A	2	HFRPELEER	3948	Unambiguous	NADH dehydrogenase [ubiquinone] flavoprotein 1, mitochondrial OS=Homo sapiens OX=9606 GN=NDUFV1 PE=1 SV=4 - [NDUV1_HUMAN]	1	1	P49821		HCD	1	0	1	1	0.027	0.364	145	153	2.66	0	63	60	3438000	3	404.876	1212.61	0	0.72	25.86	7535	7535	MS2	0/0	0	0	hela_waters_3.raw
High	A	2	AGLESGAEPGDGDSDTTK	3960	Unambiguous	H/ACA ribonucleoprotein complex subunit DKC1 OS=Homo sapiens OX=9606 GN=DKC1 PE=1 SV=3 - [DKC1_HUMAN]	1	1	O60832		HCD	1	0	1	1	0	4.99e-07	31	33	1.89	0	40	60	3717000	2	853.871	1706.74	0	0.09	25.87	7541	7541	MS2	0/0	0	0	hela_waters_3.raw
High	A	2	NYQQNYQNSESGEK	2707	Unambiguous	Nuclease-sensitive element-binding protein 1 OS=Homo sapiens OX=9606 GN=YBX1 PE=1 SV=3 - [YBOX1_HUMAN]	1	1	P67809		HCD	1	0	1	1	0	2.16e-07	23	28	2.08	0	23	60	2784000	2	844.853	1688.7	-0.01	-9.58	25.87	7542	7542	MS2	0/0	0	0	hela_waters_3.raw
High	A	2	LPEHPEGGEPEDDEAPAK	3967	Unambiguous	Cell growth-regulating nucleolar protein OS=Homo sapiens OX=9606 GN=LYAR PE=1 SV=2 - [LYAR_HUMAN]	1	1	Q9NX58		HCD	1	0	1	1	0.005	0.0632	49	54	0.85	0	0	60	2236000	2	958.926	1916.84	0	-3.54	25.87	7544	7544	MS2	0/0	0	0	hela_waters_3.raw
High	A	2	AVTEQGHELSNEER	2788	Unambiguous	14-3-3 protein beta/alpha OS=Homo sapiens OX=9606 GN=YWHAB PE=1 SV=3 - [1433B_HUMAN]	1	1	P31946		HCD	1	0	1	1	0	2.02e-13	126	137	2.37	0	30	21	16720000	3	533.586	1598.74	0	1.22	25.88	7547	7547	MS2	0/0	0	0	hela_waters_3.raw
High	A	2	KYEEIDNAPEER	3899	Unambiguous	Elongation factor Tu, mitochondrial OS=Homo sapiens OX=9606 GN=TUFM PE=1 SV=2 - [EFTU_HUMAN]	1	1	P49411		HCD	1	0	1	1	0	7.97e-11	116	108	3.11	1	14	37	14570000	2	746.848	1492.69	0	-1.25	25.88	7548	7548	MS2	0/0	0	0	hela_waters_3.raw
High	A	2	DGEEAGAYDGPR	3975	Unambiguous	Protein disulfide-isomerase A3 OS=Homo sapiens OX=9606 GN=PDIA3 PE=1 SV=4 - [PDIA3_HUMAN]	1	1	P30101		HCD	1	0	1	1	0	4.17e-15	27	18	2.44	0	36	5	45210000	2	618.76	1236.51	0	0.45	25.88	7549	7549	MS2	0/0	0	0	hela_waters_3.raw
High	A	2	RKPDTIEVQQMK	3863	Unambiguous	Ezrin OS=Homo sapiens OX=9606 GN=EZR PE=1 SV=4 - [EZRI_HUMAN]|Moesin OS=Homo sapiens OX=9606 GN=MSN PE=1 SV=3 - [MOES_HUMAN]|Radixin OS=Homo sapiens OX=9606 GN=RDX PE=1 SV=1 - [RADI_HUMAN]	3	3	P15311;P26038;P35241		HCD	1	0	1	1	0	0.00221	184	215	3.11	1	9	12	38420000	2	736.898	1472.79	0	0.04	25.88	7550	7550	MS2	0/0	0	0	hela_waters_3.raw
High	A	2	AEDGENYDIK	3979	Unambiguous	Tubulin-specific chaperone A OS=Homo sapiens OX=9606 GN=TBCA PE=1 SV=3 - [TBCA_HUMAN]	1	1	O75347		HCD	1	0	1	1	0	0.000585	52	57	1.9	0	56	9	17190000	2	577.255	1153.5	0	1.66	25.89	7551	7551	MS2	0/0	0	0	hela_waters_3.raw
High	A	2	LAVDEEENADNNTK	3983	Unambiguous	Transferrin receptor protein 1 OS=Homo sapiens OX=9606 GN=TFRC PE=1 SV=2 - [TFR1_HUMAN]	1	1	P02786		HCD	1	0	1	1	0	4.21e-16	72	53	2.95	0	36	40	14870000	2	781.353	1561.7	0	0.45	25.89	7553	7553	MS2	0/0	0	0	hela_waters_3.raw
High	A	2	YTcGEAPDYDR	3988	Unambiguous	Glutathione S-transferase Mu 3 OS=Homo sapiens OX=9606 GN=GSTM3 PE=1 SV=3 - [GSTM3_HUMAN]	1	1	P21266	C3(Carbamidomethyl)	HCD	1	0	1	1	0	2.33e-07	9	10	2.19	0	48	53	8426000	2	673.77	1346.53	0	0.99	25.89	7555	7555	MS2	0/0	0	0	hela_waters_3.raw
Middle	A	2	RKEELAEALK	3990	Unambiguous	DNA replication licensing factor MCM4 OS=Homo sapiens OX=9606 GN=MCM4 PE=1 SV=5 - [MCM4_HUMAN]	1	1	P33991		HCD	1	0	1	1	0.041	0.57	185	152	1.88	2	42	32	8300000	3	396.232	1186.68	0	1.44	25.89	7556	7556	MS2	0/0	0	0	hela_waters_3.raw
High	A	2	SEDDESGAGELTR	3995	Unambiguous	DNA replication licensing factor MCM7 OS=Homo sapiens OX=9606 GN=MCM7 PE=1 SV=4 - [MCM7_HUMAN]	1	1	P33993		HCD	1	0	1	1	0	4.21e-16	32	23	3.11	0	13	46	11300000	2	683.292	1365.58	0	0.75	25.89	7558	7558	MS2	0/0	0	0	hela_waters_3.raw
High	A	2	MGAGLGHGMDR	3997	Unambiguous	Heterogeneous nuclear ribonucleoprotein M OS=Homo sapiens OX=9606 GN=HNRNPM PE=1 SV=3 - [HNRPM_HUMAN]	1	1	P52272		HCD	1	0	1	1	0.005	0.061	52	48	2.39	0	45	49	6687000	3	367.836	1101.49	0	0.83	25.9	7559	7559	MS2	0/0	0	0	hela_waters_3.raw
High	A	2	EHGVVPQADNATPSER	4000	Unambiguous	DnaJ homolog subfamily C member 2 OS=Homo sapiens OX=9606 GN=DNAJC2 PE=1 SV=4 - [DNJC2_HUMAN]	1	1	Q99543		HCD	1	0	1	1	0.007	0.0846	140	145	1.4	0	36	60	1491000	2	853.911	1706.81	0	3.1	25.9	7561	7561	MS2	0/0	0	0	hela_waters_3.raw
High	A	2	GTDSQAMEEEKPEGHV	4002	Unambiguous	Peptidyl-prolyl cis-trans isomerase FKBP5 OS=Homo sapiens OX=9606 GN=FKBP5 PE=1 SV=2 - [FKBP5_HUMAN]	1	1	Q13451		HCD	1	0	1	1	0.001	0.00626	25	24	1.79	0	32	60	2101000	2	872.373	1743.74	-0.01	-6.46	25.9	7562	7562	MS2	0/0	0	0	hela_waters_3.raw
High	A	2	GVEVTVGHEQEEGGK	4006	Unambiguous	Glutamine amidotransferase-like class 1 domain-containing protein 3B, mitochondrial OS=Homo sapiens OX=9606 GN=GATD3B PE=1 SV=1 - [GAL3B_HUMAN]	2	1	A0A0B4J2D5		HCD	1	0	1	1	0	4.19e-05	160	138	1.61	0	0	57	1757000	2	777.874	1554.74	0	1.04	25.91	7565	7565	MS2	0/0	0	0	hela_waters_3.raw
High	A	2	TPGPGAQSALR	4013	Unambiguous	40S ribosomal protein S14 OS=Homo sapiens OX=9606 GN=RPS14 PE=1 SV=3 - [RS14_HUMAN]	1	1	P62263		HCD	1	0	1	1	0	4.21e-16	160	161	2.79	0	7	2	169700000	2	527.786	1054.56	0	0.9	25.91	7568	7568	MS2	0/0	0	0	hela_waters_3.raw
High	A	2	TDEGIAYR	4015	Unambiguous	Peroxiredoxin-2 OS=Homo sapiens OX=9606 GN=PRDX2 PE=1 SV=5 - [PRDX2_HUMAN]	1	1	P32119		HCD	1	0	1	1	0	1.4e-06	88	91	1.93	0	17	4	67630000	2	462.725	924.443	0	1.14	25.91	7569	7569	MS2	0/0	0	0	hela_waters_3.raw
High	A	2	IQVWHEEHR	4017	Unambiguous	Moesin OS=Homo sapiens OX=9606 GN=MSN PE=1 SV=3 - [MOES_HUMAN]	1	1	P26038		HCD	1	0	1	1	0	0.0032	194	189	2.1	0	13	9	28000000	3	411.876	1233.61	0	0.89	25.92	7570	7570	MS2	0/0	0	0	hela_waters_3.raw
High	A	2	HLEFSHDQYR	4019	Rejected	Sialic acid synthase OS=Homo sapiens OX=9606 GN=NANS PE=1 SV=2 - [SIAS_HUMAN]	1	1	Q9NR45		HCD	0.0049	0	1	1	0	0.000552	99	109	2.06	0	39	25	13400000	3	444.546	1331.62	0	7.94	25.92	7571	7571	MS2	0/0	0	0	hela_waters_3.raw
High	A	2	LMELHGEGSSSGK	4020	Selected	40S ribosomal protein S3a OS=Homo sapiens OX=9606 GN=RPS3A PE=1 SV=2 - [RS3A_HUMAN]	1	1	P61247		HCD		0.0049	2	2	0	4.55e-05	99	109	2.05	0	39	25	13400000	3	444.546	1331.62	0	-2.05	25.92	7571	7571	MS2	0/0	0	0	hela_waters_3.raw
High	A	2	HEQEYMEVR	4021	Unambiguous	Transmembrane emp24 domain-containing protein 2 OS=Homo sapiens OX=9606 GN=TMED2 PE=1 SV=1 - [TMED2_HUMAN]	1	1	Q15363		HCD	1	0	1	1	0	2.61e-08	59	54	2.73	0	54	44	13120000	2	610.773	1220.54	0	2.05	25.92	7572	7572	MS2	0/0	0	0	hela_waters_3.raw
High	A	2	ALEATTEHIR	4025	Unambiguous	Talin-1 OS=Homo sapiens OX=9606 GN=TLN1 PE=1 SV=3 - [TLN1_HUMAN]	1	1	Q9Y490		HCD	1	0	1	1	0.001	0.00633	146	165	2.53	0	53	54	9085000	2	570.805	1140.6	0	2.31	25.92	7574	7574	MS2	0/0	0	0	hela_waters_3.raw
High	A	2	ALEATTEHIR	4025	Unambiguous	Talin-1 OS=Homo sapiens OX=9606 GN=TLN1 PE=1 SV=3 - [TLN1_HUMAN]	1	1	Q9Y490		HCD	1	0	1	1	0	7.31e-05	153	167	2.42	0	23	60	3530000	3	380.872	1140.6	0	0.74	25.92	7575	7575	MS2	0/0	0	0	hela_waters_3.raw
High	A	2	VPASQPRPESKPESQIPPQRPQR	3152	Unambiguous	Ras GTPase-activating protein-binding protein 1 OS=Homo sapiens OX=9606 GN=G3BP1 PE=1 SV=1 - [G3BP1_HUMAN]	1	1	Q13283		HCD	1	0	1	1	0.001	0.0121	129	133	2.89	0	22	42	10280000	5	522.685	2609.39	0	1.02	25.93	7577	7577	MS2	0/0	0	0	hela_waters_3.raw
High	A	2	YSGSEGSTQTLTK	3190	Unambiguous	Protein S100-P OS=Homo sapiens OX=9606 GN=S100P PE=1 SV=2 - [S100P_HUMAN]	1	1	P25815		HCD	1	0	1	1	0	8.39e-14	106	111	2.14	0	51	42	12750000	2	679.825	1358.64	0	-1.15	25.93	7578	7578	MS2	0/0	0	0	hela_waters_3.raw
High	A	2	HEHQVMLMR	4035	Unambiguous	Non-POU domain-containing octamer-binding protein OS=Homo sapiens OX=9606 GN=NONO PE=1 SV=4 - [NONO_HUMAN]	1	1	Q15233		HCD	1	0	1	1	0.001	0.00873	166	162	2.33	0	62	31	7691000	3	394.195	1180.57	0	0.18	25.93	7579	7579	MS2	0/0	0	0	hela_waters_3.raw
High	A	2	TDAPQPDVKEEEEEKEEEK	3268	Unambiguous	Calnexin OS=Homo sapiens OX=9606 GN=CANX PE=1 SV=2 - [CALX_HUMAN]	1	1	P27824		HCD	1	0	1	1	0	0.000109	83	90	2.33	2	13	54	3765000	3	753.676	2259.01	0	-0.32	25.93	7580	7580	MS2	0/0	0	0	hela_waters_3.raw
High	A	2	ESEPQAAAEPAEAK	3463	Unambiguous	Brain acid soluble protein 1 OS=Homo sapiens OX=9606 GN=BASP1 PE=1 SV=2 - [BASP1_HUMAN]	1	1	P80723		HCD	1	0	1	1	0	5.77e-13	93	102	2.1	0	10	28	25810000	2	714.336	1427.66	0	0	25.94	7585	7585	MS2	0/0	0	0	hela_waters_3.raw
High	A	2	DHFEEAMR	4053	Unambiguous	Transitional endoplasmic reticulum ATPase OS=Homo sapiens OX=9606 GN=VCP PE=1 SV=4 - [TERA_HUMAN]	1	1	P55072		HCD	1	0	1	1	0	0.00277	29	26	1.93	0	61	4	39040000	2	517.722	1034.44	0	0.85	25.95	7589	7589	MS2	0/0	0	0	hela_waters_3.raw
High	A	2	VLANPGNSQVAR	4055	Unambiguous	Importin subunit beta-1 OS=Homo sapiens OX=9606 GN=KPNB1 PE=1 SV=2 - [IMB1_HUMAN]	1	1	Q14974		HCD	1	0	1	1	0	4.54e-13	142	142	2.6	0	27	12	29920000	2	613.336	1225.66	0	0.02	25.95	7590	7590	MS2	0/0	0	0	hela_waters_3.raw
High	A	2	ETMVTSTTEPSR	4063	Unambiguous	Glucosidase 2 subunit beta OS=Homo sapiens OX=9606 GN=PRKCSH PE=1 SV=2 - [GLU2B_HUMAN]	1	1	P14314		HCD	1	0	1	1	0	4.21e-16	105	116	2.71	0	17	8	52050000	2	669.814	1338.62	0	0.29	25.95	7594	7594	MS2	0/0	0	0	hela_waters_3.raw
High	A	2	APKPDGPGGGPGGSHMGGNYGDDR	2242	Unambiguous	RNA-binding protein FUS OS=Homo sapiens OX=9606 GN=FUS PE=1 SV=1 - [FUS_HUMAN]	1	1	P35637		HCD	1	0	1	1	0.001	0.00602	22	30	2.66	0	21	46	13060000	4	563.999	2252.98	0	0.81	25.95	7595	7595	MS2	0/0	0	0	hela_waters_3.raw
High	A	2	VAPAEPQEAPDSTAAGGSASK	4069	Unambiguous	Triokinase/FMN cyclase OS=Homo sapiens OX=9606 GN=TKFC PE=1 SV=2 - [TKFC_HUMAN]	1	1	Q3LXA3		HCD	1	0	1	1	0	4.21e-16	134	135	2.21	0	24	60	7144000	2	970.965	1940.92	0	1.08	25.96	7597	7597	MS2	0/0	0	0	hela_waters_3.raw
High	A	2	GSEASSEAGVVTTR	4071	Unambiguous	Myopalladin OS=Homo sapiens OX=9606 GN=MYPN PE=1 SV=2 - [MYPN_HUMAN]	1	1	Q86TC9		HCD	1	0	1	1	0.003	0.0341	149	156	1.19	0	78	60	2990000	2	675.827	1350.65	0	-2.57	25.96	7598	7598	MS2	0/0	0	0	hela_waters_3.raw
High	A	2	TTHFVEGGDAGNREDQINR	3854	Unambiguous	60S ribosomal protein L7 OS=Homo sapiens OX=9606 GN=RPL7 PE=1 SV=1 - [RL7_HUMAN]	1	1	P18124		HCD	1	0	1	1	0	0.000978	109	118	3.4	1	14	19	25970000	3	705.998	2115.98	0	0.25	25.97	7602	7602	MS2	0/0	0	0	hela_waters_3.raw
High	A	2	ENQQATSGPNQPSVR	2715	Unambiguous	Y-box-binding protein 3 OS=Homo sapiens OX=9606 GN=YBX3 PE=1 SV=4 - [YBOX3_HUMAN]	1	1	P16989		HCD	1	0	1	1	0	3.19e-06	142	141	2.19	0	39	59	2766000	2	806.888	1612.77	0	1.24	25.97	7603	7603	MS2	0/0	0	0	hela_waters_3.raw
High	A	2	IQEAGTEVVK	4081	Unambiguous	Malate dehydrogenase, mitochondrial OS=Homo sapiens OX=9606 GN=MDH2 PE=1 SV=3 - [MDHM_HUMAN]	1	1	P40926		HCD	1	0	1	1	0	2.43e-08	318	342	2.03	0	27	5	54060000	2	537.296	1073.58	0	0.58	25.98	7605	7605	MS2	0/0	0	0	hela_waters_3.raw
High	A	2	MRPGVAcSVSQAQK	3481	Unambiguous	60S ribosomal protein L9 OS=Homo sapiens OX=9606 GN=RPL9 PE=1 SV=1 - [RL9_HUMAN]	1	1	P32969	C7(Carbamidomethyl)	HCD	1	0	1	1	0	3.23e-06	206	203	3.03	0	15	20	15030000	3	506.923	1518.75	0	1.87	25.98	7606	7606	MS2	0/0	0	0	hela_waters_3.raw
High	A	2	EVQQGEEFER	4085	Unambiguous	Adenylate kinase isoenzyme 1 OS=Homo sapiens OX=9606 GN=AK1 PE=1 SV=3 - [KAD1_HUMAN]	1	1	P00568		HCD	1	0	1	1	0	8.71e-06	96	107	2.66	0	30	41	20130000	2	625.787	1250.57	0	2.27	25.98	7607	7607	MS2	0/0	0	0	hela_waters_3.raw
High	A	2	LLADQAEAR	4087	Unambiguous	60S ribosomal protein L19 OS=Homo sapiens OX=9606 GN=RPL19 PE=1 SV=1 - [RL19_HUMAN]	1	1	P84098		HCD	1	0	1	1	0	1.21e-07	143	160	1.93	0	23	2	111700000	2	493.767	986.526	0	-0.18	25.98	7608	7608	MS2	0/0	0	0	hela_waters_3.raw
High	A	2	DLEADEEDTR	1549	Unambiguous	Eukaryotic translation initiation factor 2 subunit 2 OS=Homo sapiens OX=9606 GN=EIF2S2 PE=1 SV=2 - [IF2B_HUMAN]	1	1	P20042		HCD	1	0	1	1	0	3.16e-11	18	24	2.05	0	61	13	13220000	2	596.751	1192.5	0	-0.9	25.98	7609	7609	MS2	0/0	0	0	hela_waters_3.raw
High	A	2	MRPGVAcSVSQAQK	3481	Unambiguous	60S ribosomal protein L9 OS=Homo sapiens OX=9606 GN=RPL9 PE=1 SV=1 - [RL9_HUMAN]	1	1	P32969	C7(Carbamidomethyl)	HCD	1	0	1	1	0	7.06e-12	193	181	3.78	0	5	41	12450000	2	759.881	1518.75	0	1.45	25.98	7610	7610	MS2	0/0	0	0	hela_waters_3.raw
High	A	2	EAMEDGEIDGNK	4093	Unambiguous	Nucleolin OS=Homo sapiens OX=9606 GN=NCL PE=1 SV=3 - [NUCL_HUMAN]	1	1	P19338		HCD	1	0	1	1	0	1.27e-12	28	22	2.38	0	37	49	9832000	2	654.273	1307.54	0	-2.92	25.98	7611	7611	MS2	0/0	0	0	hela_waters_3.raw
High	A	2	SGELAQEYDK	4099	Unambiguous	Structural maintenance of chromosomes protein 1A OS=Homo sapiens OX=9606 GN=SMC1A PE=1 SV=2 - [SMC1A_HUMAN]	1	1	Q14683		HCD	1	0	1	1	0.009	0.113	111	94	1.38	0	76	60	6833000	2	570.265	1139.52	0	1.91	25.99	7614	7614	MS2	0/0	0	0	hela_waters_3.raw
High	A	2	HRPQLLVER	4101	Unambiguous	Glutamine--tRNA ligase OS=Homo sapiens OX=9606 GN=QARS PE=1 SV=1 - [SYQ_HUMAN]	1	1	P47897		HCD	1	0	1	1	0	2e-12	102	89	3.25	0	37	52	4667000	3	383.229	1147.67	0	2.34	25.99	7615	7615	MS2	0/0	0	0	hela_waters_3.raw
High	A	2	IQEAGTEVVK	4081	Unambiguous	Malate dehydrogenase, mitochondrial OS=Homo sapiens OX=9606 GN=MDH2 PE=1 SV=3 - [MDHM_HUMAN]	1	1	P40926		HCD	1	0	1	1	0	9.02e-08	318	342	2.28	0	27	5	54060000	2	537.296	1073.58	0	0.58	25.99	7618	7618	MS2	0/0	0	0	hela_waters_3.raw
High	A	2	HQGVMVGMGQK	2468	Unambiguous	Actin, alpha cardiac muscle 1 OS=Homo sapiens OX=9606 GN=ACTC1 PE=1 SV=1 - [ACTC_HUMAN]|Beta-actin-like protein 2 OS=Homo sapiens OX=9606 GN=ACTBL2 PE=1 SV=2 - [ACTBL_HUMAN]|Actin, cytoplasmic 1 OS=Homo sapiens OX=9606 GN=ACTB PE=1 SV=1 - [ACTB_HUMAN]	7	3	P68032;Q562R1;P60709		HCD	1	0	1	1	0	4.21e-16	125	121	3.39	0	36	60	6810000	2	586.289	1171.57	0	-0.03	25.99	7619	7619	MS2	0/0	0	0	hela_waters_3.raw
Middle	A	2	SEREEVSSWR	4113	Unambiguous	Eukaryotic translation initiation factor 3 subunit A OS=Homo sapiens OX=9606 GN=EIF3A PE=1 SV=1 - [EIF3A_HUMAN]	1	1	Q14152		HCD	1	0	1	1	0.016	0.223	120	115	1.67	1	57	59	5695000	2	632.8	1264.59	0	0.49	26	7621	7621	MS2	0/0	0	0	hela_waters_3.raw
Middle	A	2	LNLSTRPEK	4119	Unambiguous	Threonine--tRNA ligase, cytoplasmic OS=Homo sapiens OX=9606 GN=TARS PE=1 SV=3 - [SYTC_HUMAN]	1	1	P26639		HCD	1	0	1	1	0.036	0.471	218	229	1.32	0	53	60	3633000	3	353.205	1057.6	0	0.74	26	7624	7624	MS2	0/0	0	0	hela_waters_3.raw
High	A	2	QTYSTEPNNLK	4121	Unambiguous	60S ribosomal protein L28 OS=Homo sapiens OX=9606 GN=RPL28 PE=1 SV=3 - [RL28_HUMAN]	1	1	P46779		HCD	1	0	1	1	0	4.99e-10	168	174	1.86	0	6	5	73990000	2	647.818	1294.63	0	1.48	26.01	7626	7626	MS2	0/0	0	0	hela_waters_3.raw
High	A	2	LMELHGEGSSSGK	4020	Unambiguous	40S ribosomal protein S3a OS=Homo sapiens OX=9606 GN=RPS3A PE=1 SV=2 - [RS3A_HUMAN]	1	1	P61247		HCD	1	0	1	1	0	4.21e-16	98	112	2.53	0	6	9	43630000	2	666.317	1331.63	0	0.71	26.01	7627	7627	MS2	0/0	0	0	hela_waters_3.raw
High	A	2	NIIHGSDSVESAEK	4129	Unambiguous	Nucleoside diphosphate kinase A OS=Homo sapiens OX=9606 GN=NME1 PE=1 SV=1 - [NDKA_HUMAN]	1	1	P15531		HCD	1	0	1	1	0	4.21e-16	136	146	3.61	0	22	26	28920000	2	743.364	1485.72	0	1.58	26.01	7630	7630	MS2	0/0	0	0	hela_waters_3.raw
High	A	2	DREEALHQFR	4131	Unambiguous	ATP-dependent RNA helicase DDX3X OS=Homo sapiens OX=9606 GN=DDX3X PE=1 SV=3 - [DDX3X_HUMAN]	2	1	O00571		HCD	1	0	1	1	0.002	0.0151	131	130	2.67	1	24	8	26910000	3	434.218	1300.64	0	1.19	26.01	7631	7631	MS2	0/0	0	0	hela_waters_3.raw
High	A	2	QPVLSQTEAR	4135	Unambiguous	Proteasome subunit beta type-4 OS=Homo sapiens OX=9606 GN=PSMB4 PE=1 SV=4 - [PSB4_HUMAN]	1	1	P28070		HCD	1	0	1	1	0	4.94e-14	159	138	2.45	0	58	7	22210000	2	564.805	1128.6	0	1.36	26.02	7633	7633	MS2	0/0	0	0	hela_waters_3.raw
High	A	2	HQGVMVGMGQK	2468	Unambiguous	Actin, alpha cardiac muscle 1 OS=Homo sapiens OX=9606 GN=ACTC1 PE=1 SV=1 - [ACTC_HUMAN]|Beta-actin-like protein 2 OS=Homo sapiens OX=9606 GN=ACTBL2 PE=1 SV=2 - [ACTBL_HUMAN]|Actin, cytoplasmic 1 OS=Homo sapiens OX=9606 GN=ACTB PE=1 SV=1 - [ACTB_HUMAN]	7	3	P68032;Q562R1;P60709		HCD	1	0	1	1	0	0.00508	120	109	2.28	0	10	22	16730000	3	391.196	1171.57	0	1.23	26.02	7634	7634	MS2	0/0	0	0	hela_waters_3.raw
High	A	2	HLAVMPHPER	4141	Unambiguous	Phosphoribosylformylglycinamidine synthase OS=Homo sapiens OX=9606 GN=PFAS PE=1 SV=4 - [PUR4_HUMAN]	1	1	O15067		HCD	1	0	1	1	0	6.31e-07	225	235	2.46	0	53	15	11330000	3	396.211	1186.62	0	2.26	26.02	7636	7636	MS2	0/0	0	0	hela_waters_3.raw
High	A	2	HSIHWPcR	4143	Unambiguous	X-ray repair cross-complementing protein 5 OS=Homo sapiens OX=9606 GN=XRCC5 PE=1 SV=3 - [XRCC5_HUMAN]	1	1	P13010	C7(Carbamidomethyl)	HCD	1	0	1	1	0.004	0.0521	142	140	2.06	0	7	60	5468000	3	364.844	1092.52	0	1.4	26.02	7637	7637	MS2	0/0	0	0	hela_waters_3.raw
High	A	2	KPFEEHWR	4145	Unambiguous	Succinate dehydrogenase [ubiquinone] flavoprotein subunit, mitochondrial OS=Homo sapiens OX=9606 GN=SDHA PE=1 SV=2 - [SDHA_HUMAN]	1	1	P31040		HCD	1	0	1	1	0	0.00337	153	139	1.66	0	32	60	3661000	3	376.858	1128.56	0	0.15	26.02	7638	7638	MS2	0/0	0	0	hela_waters_3.raw
High	A	2	AEScGSGNSTGYQIR	4147	Unambiguous	ATP-dependent DNA/RNA helicase DHX36 OS=Homo sapiens OX=9606 GN=DHX36 PE=1 SV=2 - [DHX36_HUMAN]	1	1	Q9H2U1	C4(Carbamidomethyl)	HCD	1	0	1	1	0	2.82e-10	49	49	2.42	0	0	59	2250000	2	793.848	1586.69	0	1.33	26.03	7639	7639	MS2	0/0	0	0	hela_waters_3.raw
High	A	2	APEQEQAAPGPAAGGEAPK	4156	Unambiguous	Brain acid soluble protein 1 OS=Homo sapiens OX=9606 GN=BASP1 PE=1 SV=2 - [BASP1_HUMAN]	1	1	P80723		HCD	1	0	1	1	0	4.21e-16	190	157	3.73	0	5	34	24330000	2	888.433	1775.86	0	1.18	26.04	7644	7644	MS2	0/0	0	0	hela_waters_3.raw
High	A	2	EMGTPDVR	4160	Unambiguous	60S ribosomal protein L31 OS=Homo sapiens OX=9606 GN=RPL31 PE=1 SV=1 - [RL31_HUMAN]	1	1	P62899		HCD	1	0	1	1	0.005	0.0553	86	89	1.59	0	20	3	79180000	2	452.714	904.42	0	1.02	26.04	7647	7647	MS2	0/0	0	0	hela_waters_3.raw
High	A	2	STESLQANVQR	4162	Unambiguous	60S ribosomal protein L13 OS=Homo sapiens OX=9606 GN=RPL13 PE=1 SV=4 - [RL13_HUMAN]	1	1	P26373		HCD	1	0	1	1	0	3.14e-12	215	224	2.5	0	6	5	77010000	2	616.815	1232.62	0	0.08	26.05	7648	7648	MS2	0/0	0	0	hela_waters_3.raw
High	A	2	NIIHGSDSVESAEK	4129	Unambiguous	Nucleoside diphosphate kinase A OS=Homo sapiens OX=9606 GN=NME1 PE=1 SV=1 - [NDKA_HUMAN]	1	1	P15531		HCD	1	0	1	1	0	6.23e-05	126	136	2.04	0	15	6	55880000	3	495.911	1485.72	0	-0.08	26.05	7649	7649	MS2	0/0	0	0	hela_waters_3.raw
High	A	2	RAGELTEDEVER	3846	Unambiguous	40S ribosomal protein S18 OS=Homo sapiens OX=9606 GN=RPS18 PE=1 SV=3 - [RS18_HUMAN]	1	1	P62269		HCD	1	0	1	1	0.001	0.00983	145	133	2.34	1	39	8	33510000	3	468.564	1403.68	0	0.82	26.05	7651	7651	MS2	0/0	0	0	hela_waters_3.raw
High	A	2	HEQNIDcGGGYVK	3581	Unambiguous	Calreticulin OS=Homo sapiens OX=9606 GN=CALR PE=1 SV=1 - [CALR_HUMAN]	1	1	P27797	C7(Carbamidomethyl)	HCD	1	0	1	1	0	4.21e-16	62	63	4.03	0	18	29	25720000	2	738.831	1476.65	0	0.38	26.05	7652	7652	MS2	0/0	0	0	hela_waters_3.raw
High	A	2	LLETTDRPDGHQNNLR	4172	Unambiguous	Importin subunit beta-1 OS=Homo sapiens OX=9606 GN=KPNB1 PE=1 SV=2 - [IMB1_HUMAN]	1	1	Q14974		HCD	1	0	1	1	0	2.19e-06	193	211	3.25	0	23	30	23800000	3	626.986	1878.94	0	0.16	26.05	7653	7653	MS2	0/0	0	0	hela_waters_3.raw
High	A	2	EVSSATNALR	4174	Unambiguous	U1 small nuclear ribonucleoprotein A OS=Homo sapiens OX=9606 GN=SNRPA PE=1 SV=3 - [SNRPA_HUMAN]	1	1	P09012		HCD	1	0	1	1	0	3.61e-06	207	219	2.48	0	25	14	17480000	2	524.275	1047.54	0	0.17	26.05	7654	7654	MS2	0/0	0	0	hela_waters_3.raw
High	A	2	FAAAYcR	4178	Unambiguous	Pyruvate dehydrogenase E1 component subunit alpha, somatic form, mitochondrial OS=Homo sapiens OX=9606 GN=PDHA1 PE=1 SV=3 - [ODPA_HUMAN]	1	1	P08559	C6(Carbamidomethyl)	HCD	1	0	1	1	0.003	0.0329	38	47	1.86	0	61	30	6758000	2	429.701	858.394	0	1.6	26.06	7656	7656	MS2	0/0	0	0	hela_waters_3.raw
High	A	2	AAHSEGNTTAGLDMR	4180	Unambiguous	T-complex protein 1 subunit beta OS=Homo sapiens OX=9606 GN=CCT2 PE=1 SV=4 - [TCPB_HUMAN]	1	1	P78371		HCD	1	0	1	1	0	4.21e-16	79	67	2.88	0	27	53	5580000	2	765.851	1530.7	0	-0.58	26.06	7657	7657	MS2	0/0	0	0	hela_waters_3.raw
High	A	2	LLETTDRPDGHQNNLR	4172	Unambiguous	Importin subunit beta-1 OS=Homo sapiens OX=9606 GN=KPNB1 PE=1 SV=2 - [IMB1_HUMAN]	1	1	Q14974		HCD	1	0	1	1	0	0.000537	213	217	1.89	0	35	60	3994000	2	939.977	1878.95	0	2.32	26.06	7658	7658	MS2	0/0	0	0	hela_waters_3.raw
High	A	2	ELSEQIQR	4184	Unambiguous	Ezrin OS=Homo sapiens OX=9606 GN=EZR PE=1 SV=4 - [EZRI_HUMAN]	1	1	P15311		HCD	1	0	1	1	0	0.00372	209	218	1.8	0	35	5	24950000	2	501.764	1002.52	0	0.04	26.06	7659	7659	MS2	0/0	0	0	hela_waters_3.raw
High	A	2	VEQATKPSFESGR	3524	Unambiguous	RNA-binding motif protein, X chromosome OS=Homo sapiens OX=9606 GN=RBMX PE=1 SV=3 - [RBMX_HUMAN]	1	1	P38159		HCD	1	0	1	1	0	0.000245	197	209	1.82	0	14	48	4035000	2	718.363	1435.72	0	1.22	26.06	7660	7660	MS2	0/0	0	0	hela_waters_3.raw
Middle	A	2	TSTTGVATTQSPTPR	4192	Unambiguous	LIM domain only protein 7 OS=Homo sapiens OX=9606 GN=LMO7 PE=1 SV=3 - [LMO7_HUMAN]	1	1	Q8WWI1		HCD	1	0	1	1	0.01	0.148	206	206	1.67	0	61	56	4216000	2	752.879	1504.75	0	-6.28	26.07	7663	7663	MS2	0/0	0	0	hela_waters_3.raw
High	A	2	ADPDGPEAQAEAcSGER	4194	Unambiguous	H/ACA ribonucleoprotein complex subunit 2 OS=Homo sapiens OX=9606 GN=NHP2 PE=1 SV=1 - [NHP2_HUMAN]	1	1	Q9NX24	C13(Carbamidomethyl)	HCD	1	0	1	1	0	4.21e-16	17	19	2.61	0	0	60	2063000	2	880.365	1759.72	0	2.1	26.07	7664	7664	MS2	0/0	0	0	hela_waters_3.raw
Middle	A	2	RFPGYDSESK	4196	Unambiguous	60S ribosomal protein L5 OS=Homo sapiens OX=9606 GN=RPL5 PE=1 SV=3 - [RL5_HUMAN]	1	1	P46777		HCD	1	0	1	1	0.041	0.558	96	97	2.36	1	13	3	86210000	2	593.28	1185.55	0	-0.21	26.07	7666	7666	MS2	0/0	0	0	hela_waters_3.raw
High	A	2	ccTESLVNR	4204	Unambiguous	Serum albumin OS=Homo sapiens OX=9606 GN=ALB PE=1 SV=2 - [ALBU_HUMAN]	1	1	P02768	C1(Carbamidomethyl); C2(Carbamidomethyl)	HCD	1	0	1	1	0	4.19e-10	48	42	2.35	0	33	8	24980000	2	569.753	1138.5	0	0.73	26.08	7670	7670	MS2	0/0	0	0	hela_waters_3.raw
High	A	2	QSVENDIHGLRK	4206	Unambiguous	Keratin, type I cytoskeletal 18 OS=Homo sapiens OX=9606 GN=KRT18 PE=1 SV=2 - [K1C18_HUMAN]	1	1	P05783		HCD	1	0	1	1	0	1.97e-10	182	165	2.72	1	31	43	11540000	2	698.37	1395.73	0	-0.98	26.08	7671	7671	MS2	0/0	0	0	hela_waters_3.raw
High	A	2	NcPHVVVGTPGR	4208	Unambiguous	ATP-dependent RNA helicase DDX39A OS=Homo sapiens OX=9606 GN=DDX39A PE=1 SV=2 - [DX39A_HUMAN]	1	1	O00148	C2(Carbamidomethyl)	HCD	1	0	1	1	0	1.6e-11	195	201	2.57	0	49	60	11270000	3	431.556	1292.65	0	0.3	26.08	7672	7672	MS2	0/0	0	0	hela_waters_3.raw
Middle	A	2	YDERPGPSPLPHR	4210	Unambiguous	U1 small nuclear ribonucleoprotein 70 kDa OS=Homo sapiens OX=9606 GN=SNRNP70 PE=1 SV=2 - [RU17_HUMAN]	1	1	P08621		HCD	1	0	1	1	0.013	0.194	224	225	2.05	0	25	60	3756000	4	380.946	1520.76	0	0.57	26.08	7673	7673	MS2	0/0	0	0	hela_waters_3.raw
High	A	2	STTTGHLIYK	4153	Unambiguous	Elongation factor 1-alpha 1 OS=Homo sapiens OX=9606 GN=EEF1A1 PE=1 SV=1 - [EF1A1_HUMAN]|Elongation factor 1-alpha 2 OS=Homo sapiens OX=9606 GN=EEF1A2 PE=1 SV=1 - [EF1A2_HUMAN]	3	2	P68104;Q05639		HCD	1	0	1	1	0	2.21e-08	184	198	1.96	0	28	4	48570000	2	560.804	1120.6	0	1.25	26.1	7682	7682	MS2	0/0	0	0	hela_waters_3.raw
High	A	2	QDVDNASLAR	3615	Unambiguous	Vimentin OS=Homo sapiens OX=9606 GN=VIM PE=1 SV=4 - [VIME_HUMAN]	1	1	P08670		HCD	1	0	1	1	0	2.09e-08	139	139	1.82	0	51	4	22680000	2	544.769	1088.53	0	-1.35	26.1	7683	7683	MS2	0/0	0	0	hela_waters_3.raw
High	A	2	AVTEQGHELSNEER	2788	Unambiguous	14-3-3 protein beta/alpha OS=Homo sapiens OX=9606 GN=YWHAB PE=1 SV=3 - [1433B_HUMAN]	1	1	P31946		HCD	1	0	1	1	0	4.21e-16	122	136	3.1	0	0	43	8177000	2	799.874	1598.74	0	-0.18	26.1	7684	7684	MS2	0/0	0	0	hela_waters_3.raw
High	A	2	YKPESEELTAER	4232	Unambiguous	Protein disulfide-isomerase OS=Homo sapiens OX=9606 GN=P4HB PE=1 SV=3 - [PDIA1_HUMAN]	1	1	P07237		HCD	1	0	1	1	0.001	0.00957	186	161	1.59	0	49	15	23770000	3	484.573	1451.7	0	1.39	26.1	7685	7685	MS2	0/0	0	0	hela_waters_3.raw
High	A	2	HWDHLTQVK	4234	Unambiguous	Enoyl-CoA hydratase, mitochondrial OS=Homo sapiens OX=9606 GN=ECHS1 PE=1 SV=4 - [ECHM_HUMAN]	1	1	P30084		HCD	1	0	1	1	0.007	0.078	192	179	1.95	0	12	25	11080000	3	388.537	1163.6	0	1.2	26.11	7686	7686	MS2	0/0	0	0	hela_waters_3.raw
High	A	2	DEFTNTcPSDK	4236	Unambiguous	Chloride intracellular channel protein 4 OS=Homo sapiens OX=9606 GN=CLIC4 PE=1 SV=4 - [CLIC4_HUMAN]	1	1	Q9Y696	C7(Carbamidomethyl)	HCD	1	0	1	1	0	9.73e-08	16	19	2.11	0	60	49	8946000	2	657.269	1313.53	0	-0.04	26.11	7687	7687	MS2	0/0	0	0	hela_waters_3.raw
High	A	2	TPcNAGTFSQPEK	4238	Unambiguous	Mitotic checkpoint protein BUB3 OS=Homo sapiens OX=9606 GN=BUB3 PE=1 SV=1 - [BUB3_HUMAN]	1	1	O43684	C3(Carbamidomethyl)	HCD	1	0	1	1	0	8.91e-11	91	89	2.95	0	47	47	8266000	2	718.828	1436.65	0	0.68	26.11	7688	7688	MS2	0/0	0	0	hela_waters_3.raw
High	A	2	AADPPAENSSAPEAEQGGAE	4240	Unambiguous	Nuclease-sensitive element-binding protein 1 OS=Homo sapiens OX=9606 GN=YBX1 PE=1 SV=3 - [YBOX1_HUMAN]	1	1	P67809		HCD	1	0	1	1	0.007	0.0835	28	35	1.36	0	0	60	2926000	2	949.407	1897.81	0	1.55	26.11	7689	7689	MS2	0/0	0	0	hela_waters_3.raw
High	A	2	TSSVSNPQDSVGSPcSR	4244	Unambiguous	Paxillin OS=Homo sapiens OX=9606 GN=PXN PE=1 SV=3 - [PAXI_HUMAN]	1	1	P49023	C15(Carbamidomethyl)	HCD	1	0	1	1	0	4.19e-05	90	67	1.5	0	0	60	1926000	2	882.894	1764.78	0	-0.07	26.11	7691	7691	MS2	0/0	0	0	hela_waters_3.raw
High	A	2	HFNAPSHIR	4249	Unambiguous	60S ribosomal protein L26 OS=Homo sapiens OX=9606 GN=RPL26 PE=1 SV=1 - [RL26_HUMAN]	1	1	P61254		HCD	1	0	1	1	0.009	0.124	216	258	1.83	0	56	60	1687000	3	360.191	1078.56	0	4.29	26.12	7694	7694	MS2	0/0	0	0	hela_waters_3.raw
High	A	2	LIEVDDERK	4251	Unambiguous	40S ribosomal protein S6 OS=Homo sapiens OX=9606 GN=RPS6 PE=1 SV=1 - [RS6_HUMAN]	1	1	P62753		HCD	1	0	1	1	0.001	0.0112	270	269	1.87	1	24	15	13660000	3	372.868	1116.59	0	0.97	26.12	7696	7696	MS2	0/0	0	0	hela_waters_3.raw
High	A	2	LQSIGTENTEENR	4256	Unambiguous	Fructose-bisphosphate aldolase A OS=Homo sapiens OX=9606 GN=ALDOA PE=1 SV=2 - [ALDOA_HUMAN]	1	1	P04075		HCD	1	0	1	1	0	4.21e-16	154	148	3.14	0	4	10	53830000	2	745.858	1490.71	0	0.31	26.13	7699	7699	MS2	0/0	0	0	hela_waters_3.raw
High	A	2	NHEEEISTLR	4258	Unambiguous	Keratin, type I cytoskeletal 19 OS=Homo sapiens OX=9606 GN=KRT19 PE=1 SV=4 - [K1C19_HUMAN]	1	1	P08727		HCD	1	0	1	1	0	0.000297	121	133	2.65	0	45	11	30590000	2	614.302	1227.6	0	0.03	26.13	7700	7700	MS2	0/0	0	0	hela_waters_3.raw
High	A	2	IANPVEGSSGR	4262	Unambiguous	Poly(rC)-binding protein 1 OS=Homo sapiens OX=9606 GN=PCBP1 PE=1 SV=2 - [PCBP1_HUMAN]	1	1	Q15365		HCD	1	0	1	1	0	3.86e-13	151	140	2.59	0	22	5	30330000	2	543.779	1086.55	0	-2.69	26.14	7702	7702	MS2	0/0	0	0	hela_waters_3.raw
High	A	2	DIIHDPGR	4264	Unambiguous	60S ribosomal protein L8 OS=Homo sapiens OX=9606 GN=RPL8 PE=1 SV=2 - [RL8_HUMAN]	1	1	P62917		HCD	1	0	1	1	0.001	0.013	152	153	1.42	0	27	6	26930000	2	461.741	922.475	0	0.48	26.14	7703	7703	MS2	0/0	0	0	hela_waters_3.raw
High	A	2	EVDATSPAPSTSSTVK	4266	Unambiguous	Gamma-interferon-inducible protein 16 OS=Homo sapiens OX=9606 GN=IFI16 PE=1 SV=3 - [IF16_HUMAN]	1	1	Q16666		HCD	1	0	1	1	0	4.21e-16	177	150	2.41	0	17	43	9352000	2	788.888	1576.77	0	-0.43	26.14	7704	7704	MS2	0/0	0	0	hela_waters_3.raw
High	A	2	LAQALHEMR	4270	Unambiguous	Lamin-B1 OS=Homo sapiens OX=9606 GN=LMNB1 PE=1 SV=2 - [LMNB1_HUMAN]	1	1	P20700		HCD	1	0	1	1	0.001	0.00965	131	142	2	0	52	60	2517000	3	356.859	1068.56	0	1.79	26.14	7706	7706	MS2	0/0	0	0	hela_waters_3.raw
High	A	2	YLAEVAAGDDKK	4274	Unambiguous	14-3-3 protein zeta/delta OS=Homo sapiens OX=9606 GN=YWHAZ PE=1 SV=1 - [1433Z_HUMAN]	1	1	P63104		HCD	1	0	1	1	0	7.34e-07	200	190	2.66	1	69	30	5733000	3	427.223	1279.66	0	1.82	26.14	7708	7708	MS2	0/0	0	0	hela_waters_3.raw
High	A	2	DEPVRDENGYcVR	4276	Unambiguous	Very long-chain acyl-CoA synthetase OS=Homo sapiens OX=9606 GN=SLC27A2 PE=1 SV=2 - [S27A2_HUMAN]	1	1	O14975	C11(Carbamidomethyl)	HCD	1	0	1	1	0	0.000239	58	64	1.7	1	59	53	3771000	2	804.863	1608.72	0.01	7.53	26.15	7709	7709	MS2	0/0	0	0	hela_waters_3.raw
High	A	2	DAPQDFHPDR	3702	Unambiguous	Filamin-A OS=Homo sapiens OX=9606 GN=FLNA PE=1 SV=4 - [FLNA_HUMAN]	1	1	P21333		HCD	1	0	1	1	0	0.00241	61	55	1.97	0	55	60	4211000	3	399.848	1197.53	0	1.71	26.15	7713	7713	MS2	0/0	0	0	hela_waters_3.raw
High	A	2	YLAEVAAGDDKK	4274	Unambiguous	14-3-3 protein zeta/delta OS=Homo sapiens OX=9606 GN=YWHAZ PE=1 SV=1 - [1433Z_HUMAN]	1	1	P63104		HCD	1	0	1	1	0	2.26e-10	194	196	2.47	1	20	13	27550000	2	640.33	1279.65	0	0.35	26.16	7714	7714	MS2	0/0	0	0	hela_waters_3.raw
High	A	2	VDNLTYR	4287	Unambiguous	Serine/arginine-rich splicing factor 2 OS=Homo sapiens OX=9606 GN=SRSF2 PE=1 SV=4 - [SRSF2_HUMAN]	2	1	Q01130		HCD	1	0	1	1	0.002	0.0148	155	158	1.86	0	31	12	17510000	2	440.731	880.454	0	1.65	26.16	7715	7715	MS2	0/0	0	0	hela_waters_3.raw
High	A	2	NMSVIAHVDHGK	4289	Unambiguous	Elongation factor 2 OS=Homo sapiens OX=9606 GN=EEF2 PE=1 SV=4 - [EF2_HUMAN]	1	1	P13639		HCD	1	0	1	1	0	9.05e-07	198	188	2.99	0	30	27	8552000	3	436.556	1307.65	0	1.46	26.16	7716	7716	MS2	0/0	0	0	hela_waters_3.raw
High	A	2	NMMAAcDPR	4302	Unambiguous	Tubulin beta-2A chain OS=Homo sapiens OX=9606 GN=TUBB2A PE=1 SV=1 - [TBB2A_HUMAN]|Tubulin beta-3 chain OS=Homo sapiens OX=9606 GN=TUBB3 PE=1 SV=2 - [TBB3_HUMAN]|Tubulin beta-4A chain OS=Homo sapiens OX=9606 GN=TUBB4A PE=1 SV=2 - [TBB4A_HUMAN]|Tubulin beta-4B chain OS=Homo sapiens OX=9606 GN=TUBB4B PE=1 SV=1 - [TBB4B_HUMAN]|Tubulin beta chain OS=Homo sapiens OX=9606 GN=TUBB PE=1 SV=2 - [TBB5_HUMAN…	9	3	P68371;P07437;Q9BUF5	C6(Carbamidomethyl)	HCD	1	0	1	1	0	1.09e-08	14	13	2.24	0	23	4	69070000	2	533.218	1065.43	0	0.83	26.17	7723	7723	MS2	0/0	0	0	hela_waters_3.raw
High	A	2	NILDSKPTANK	4304	Unambiguous	Coronin-1C OS=Homo sapiens OX=9606 GN=CORO1C PE=1 SV=1 - [COR1C_HUMAN]	1	1	Q9ULV4		HCD	1	0	1	1	0.001	0.0128	219	223	1.68	0	48	49	4471000	3	400.891	1200.66	0	0.23	26.17	7724	7724	MS2	0/0	0	0	hela_waters_3.raw
High	A	2	SPPGQVTEAVK	4310	Unambiguous	Aldose reductase OS=Homo sapiens OX=9606 GN=AKR1B1 PE=1 SV=3 - [ALDR_HUMAN]	1	1	P15121		HCD	1	0	1	1	0.001	0.00671	127	117	1.18	0	34	5	30640000	2	556.8	1112.59	0	-1.33	26.19	7729	7729	MS2	0/0	0	0	hela_waters_3.raw
High	A	2	HWDHLTQVK	4234	Unambiguous	Enoyl-CoA hydratase, mitochondrial OS=Homo sapiens OX=9606 GN=ECHS1 PE=1 SV=4 - [ECHM_HUMAN]	1	1	P30084		HCD	1	0	1	1	0.005	0.0659	192	179	1.82	0	57	17	13280000	2	582.302	1163.6	0	1.24	26.19	7730	7730	MS2	0/0	0	0	hela_waters_3.raw
High	A	2	TQNDVLHAENVK	4322	Unambiguous	Radixin OS=Homo sapiens OX=9606 GN=RDX PE=1 SV=1 - [RADI_HUMAN]	1	1	P35241		HCD	1	0	1	1	0.001	0.00576	188	195	1.93	0	22	57	4026000	2	684.353	1367.7	0	4.66	26.2	7735	7735	MS2	0/0	0	0	hela_waters_3.raw
Middle	A	2	EAPGPNGATEEDGVPSK	4324	Unambiguous	Choline-phosphate cytidylyltransferase A OS=Homo sapiens OX=9606 GN=PCYT1A PE=1 SV=2 - [PCY1A_HUMAN]	1	1	P49585		HCD	1	0	1	1	0.017	0.238	94	107	0.96	0	27	57	2774000	2	827.884	1654.76	0	2.78	26.2	7736	7736	MS2	0/0	0	0	hela_waters_3.raw
High	A	2	NHEEEMNALR	1837	Unambiguous	Keratin, type I cytoskeletal 17 OS=Homo sapiens OX=9606 GN=KRT17 PE=1 SV=2 - [K1C17_HUMAN]	2	1	Q04695		HCD	1	0	1	1	0	1.9e-08	54	45	2.35	0	9	8	43810000	2	621.78	1242.55	0	0.14	26.21	7743	7743	MS2	0/0	0	0	hela_waters_3.raw
High	A	2	NHEEEMNALR	1837	Unambiguous	Keratin, type I cytoskeletal 17 OS=Homo sapiens OX=9606 GN=KRT17 PE=1 SV=2 - [K1C17_HUMAN]	2	1	Q04695		HCD	1	0	1	1	0.005	0.0634	65	60	2.31	0	32	44	5605000	3	414.857	1242.56	0	2.44	26.21	7744	7744	MS2	0/0	0	0	hela_waters_3.raw
High	A	2	MDSTEPPYSQK	3772	Unambiguous	Elongation factor 1-alpha 1 OS=Homo sapiens OX=9606 GN=EEF1A1 PE=1 SV=1 - [EF1A1_HUMAN]	2	1	P68104		HCD	1	0	1	1	0.001	0.0123	69	56	1.42	0	45	31	16970000	2	641.785	1282.56	0	0.78	26.21	7745	7745	MS2	0/0	0	0	hela_waters_3.raw
High	A	2	TLHPDLGTDK	4343	Unambiguous	L-lactate dehydrogenase A chain OS=Homo sapiens OX=9606 GN=LDHA PE=1 SV=2 - [LDHA_HUMAN]	1	1	P00338		HCD	1	0	1	1	0	0.00324	158	150	1.64	0	50	5	32230000	2	548.786	1096.57	0	1.6	26.21	7746	7746	MS2	0/0	0	0	hela_waters_3.raw
High	A	2	QVSDDLTER	4345	Unambiguous	Prohibitin OS=Homo sapiens OX=9606 GN=PHB PE=1 SV=1 - [PHB_HUMAN]	1	1	P35232		HCD	1	0	1	1	0	9.28e-09	131	135	1.95	0	45	6	19860000	2	531.757	1062.51	0	0.6	26.22	7747	7747	MS2	0/0	0	0	hela_waters_3.raw
High	A	2	TLHPDLGTDK	4343	Unambiguous	L-lactate dehydrogenase A chain OS=Homo sapiens OX=9606 GN=LDHA PE=1 SV=2 - [LDHA_HUMAN]	1	1	P00338		HCD	1	0	1	1	0.001	0.00595	165	158	1.72	0	21	24	9070000	3	366.193	1096.56	0	0.55	26.22	7749	7749	MS2	0/0	0	0	hela_waters_3.raw
High	A	2	IEYNDQNDGScDVK	3744	Unambiguous	Filamin-B OS=Homo sapiens OX=9606 GN=FLNB PE=1 SV=2 - [FLNB_HUMAN]	1	1	O75369	C11(Carbamidomethyl)	HCD	1	0	1	1	0	4.89e-11	17	24	1.7	0	33	57	3497000	2	828.845	1656.68	0	1.8	26.22	7750	7750	MS2	0/0	0	0	hela_waters_3.raw
High	A	2	EAQELSQNSAIK	4355	Unambiguous	Nucleolar RNA helicase 2 OS=Homo sapiens OX=9606 GN=DDX21 PE=1 SV=5 - [DDX21_HUMAN]	1	1	Q9NR30		HCD	1	0	1	1	0	1.85e-08	221	211	2.31	0	41	43	10820000	2	659.337	1317.67	0	1.71	26.22	7752	7752	MS2	0/0	0	0	hela_waters_3.raw
High	A	2	ETPAATEAPSSTPK	3188	Unambiguous	Brain acid soluble protein 1 OS=Homo sapiens OX=9606 GN=BASP1 PE=1 SV=2 - [BASP1_HUMAN]	1	1	P80723		HCD	1	0	1	1	0	4.21e-16	152	145	3.09	0	14	32	18990000	2	693.842	1386.68	0	1.2	26.23	7755	7755	MS2	0/0	0	0	hela_waters_3.raw
High	A	2	ADMETLQR	4364	Unambiguous	Threonine--tRNA ligase, cytoplasmic OS=Homo sapiens OX=9606 GN=TARS PE=1 SV=3 - [SYTC_HUMAN]	1	1	P26639		HCD	1	0	1	1	0	6.4e-06	145	160	1.78	0	33	6	24330000	2	482.233	963.459	0	2.41	26.24	7758	7758	MS2	0/0	0	0	hela_waters_3.raw
High	A	2	DWHRPcLK	4369	Unambiguous	Cysteine-rich protein 1 OS=Homo sapiens OX=9606 GN=CRIP1 PE=1 SV=3 - [CRIP1_HUMAN]	1	1	P50238	C6(Carbamidomethyl)	HCD	1	0	1	2	0.002	0.0141	139	149	1.55	0	31	12	13090000	3	371.188	1111.55	0	1.37	26.24	7760	7760	MS2	0/0	0	0	hela_waters_3.raw
High	A	2	cFSEENHEPLR	4375	Unambiguous	Vacuolar protein sorting-associated protein 35 OS=Homo sapiens OX=9606 GN=VPS35 PE=1 SV=2 - [VPS35_HUMAN]	1	1	Q96QK1	C1(Carbamidomethyl)	HCD	1	0	1	1	0.002	0.0181	42	51	1.1	0	59	20	6284000	3	473.211	1417.62	0	1.85	26.24	7763	7763	MS2	0/0	0	0	hela_waters_3.raw
High	A	2	YYPTEDVPRK	4377	Unambiguous	60S ribosomal protein L6 OS=Homo sapiens OX=9606 GN=RPL6 PE=1 SV=3 - [RL6_HUMAN]	1	1	Q02878		HCD	1	0	1	1	0	0.00158	164	174	2.01	1	48	10	15590000	3	423.217	1267.64	0	3.87	26.25	7764	7764	MS2	0/0	0	0	hela_waters_3.raw
High	A	2	NMSVIAHVDHGK	4289	Unambiguous	Elongation factor 2 OS=Homo sapiens OX=9606 GN=EEF2 PE=1 SV=4 - [EF2_HUMAN]	1	1	P13639		HCD	1	0	1	1	0	6.11e-11	198	188	2.17	0	52	6	36070000	2	654.331	1307.65	0	1.38	26.26	7773	7773	MS2	0/0	0	0	hela_waters_3.raw
High	A	2	IVAVTGAEAQK	4395	Unambiguous	Alanine--tRNA ligase, cytoplasmic OS=Homo sapiens OX=9606 GN=AARS PE=1 SV=2 - [SYAC_HUMAN]	1	1	P49588		HCD	1	0	1	1	0	0.000441	254	241	1.58	0	55	3	35660000	2	543.812	1086.62	0	1.79	26.26	7774	7774	MS2	0/0	0	0	hela_waters_3.raw
High	A	2	HYYEVScHDQGLcR	4400	Unambiguous	ATP-dependent RNA helicase DDX1 OS=Homo sapiens OX=9606 GN=DDX1 PE=1 SV=2 - [DDX1_HUMAN]	1	1	Q92499	C7(Carbamidomethyl); C13(Carbamidomethyl)	HCD	1	0	1	1	0	4.21e-16	26	29	2.78	0	0	60	2590000	2	912.384	1823.76	0	1.2	26.27	7777	7777	MS2	0/0	0	0	hela_waters_3.raw
High	A	2	YHPGYFGK	4402	Unambiguous	60S ribosomal protein L27a OS=Homo sapiens OX=9606 GN=RPL27A PE=1 SV=2 - [RL27A_HUMAN]	1	1	P46776		HCD	1	0	1	1	0	0.00547	86	83	1.63	0	60	2	58740000	2	484.736	968.464	0	1.97	26.27	7778	7778	MS2	0/0	0	0	hela_waters_3.raw
High	A	2	RAGELTEDEVER	3846	Unambiguous	40S ribosomal protein S18 OS=Homo sapiens OX=9606 GN=RPS18 PE=1 SV=3 - [RS18_HUMAN]	1	1	P62269		HCD	1	0	1	1	0	2.73e-11	147	142	3.16	1	6	35	16550000	2	702.343	1403.68	0	2	26.28	7780	7780	MS2	0/0	0	0	hela_waters_3.raw
High	A	2	YRPGTVALR	4410	Unambiguous	Histone H3.1 OS=Homo sapiens OX=9606 GN=HIST1H3A PE=1 SV=2 - [H31_HUMAN]	5	1	P68431		HCD	1	0	1	1	0.004	0.0544	120	125	1.93	0	42	3	50180000	2	516.802	1032.6	0	2.45	26.28	7783	7783	MS2	0/0	0	0	hela_waters_3.raw
High	A	2	STcIYGGAPK	4412	Unambiguous	Probable ATP-dependent RNA helicase DDX5 OS=Homo sapiens OX=9606 GN=DDX5 PE=1 SV=1 - [DDX5_HUMAN]|Probable ATP-dependent RNA helicase DDX17 OS=Homo sapiens OX=9606 GN=DDX17 PE=1 SV=2 - [DDX17_HUMAN]	2	2	P17844;Q92841	C3(Carbamidomethyl)	HCD	1	0	1	1	0	3.77e-07	145	152	1.53	0	48	3	44990000	2	527.256	1053.5	0	0.76	26.28	7784	7784	MS2	0/0	0	0	hela_waters_3.raw
High	A	2	HPQPGAVELAAK	4414	Unambiguous	CAD protein OS=Homo sapiens OX=9606 GN=CAD PE=1 SV=3 - [PYR1_HUMAN]	1	1	P27708		HCD	1	0	1	1	0.002	0.0133	211	231	1.68	0	61	16	13240000	2	609.337	1217.67	0	2.09	26.28	7785	7785	MS2	0/0	0	0	hela_waters_3.raw
High	A	2	ScVEEPEPEPEAAEGDGDKK	4418	Unambiguous	Hepatoma-derived growth factor OS=Homo sapiens OX=9606 GN=HDGF PE=1 SV=1 - [HDGF_HUMAN]	1	1	P51858	C2(Carbamidomethyl)	HCD	1	0	1	1	0	0.00474	48	47	1.89	1	34	60	2764000	2	1086.97	2172.92	0	-0.22	26.29	7787	7787	MS2	0/0	0	0	hela_waters_3.raw
Middle	A	2	LSYNVR	4426	Unambiguous	Serine/arginine-rich splicing factor 6 OS=Homo sapiens OX=9606 GN=SRSF6 PE=1 SV=2 - [SRSF6_HUMAN]	1	1	Q13247		HCD	1	0	1	1	0.039	0.534	121	120	1.53	0	15	51	5735000	2	376.209	751.411	0	1.52	26.3	7792	7792	MS2	0/0	0	0	hela_waters_3.raw
High	A	2	LcTSATESEVAR	4431	Unambiguous	Cytochrome b-c1 complex subunit 1, mitochondrial OS=Homo sapiens OX=9606 GN=UQCRC1 PE=1 SV=3 - [QCR1_HUMAN]	1	1	P31930	C2(Carbamidomethyl)	HCD	1	0	1	1	0	4.21e-16	128	133	2.79	0	10	38	13160000	2	662.314	1323.62	0	-0.42	26.3	7795	7795	MS2	0/0	0	0	hela_waters_3.raw
High	A	2	LHNELQSGSLR	4433	Unambiguous	RRP12-like protein OS=Homo sapiens OX=9606 GN=RRP12 PE=1 SV=2 - [RRP12_HUMAN]	1	1	Q5JTH9		HCD	1	0	1	1	0	0.00508	180	167	2.06	0	8	60	7362000	3	418.558	1253.66	0	-0.62	26.31	7796	7796	MS2	0/0	0	0	hela_waters_3.raw
High	A	2	HSGPNSADSANDGFVR	3869	Unambiguous	Heterogeneous nuclear ribonucleoprotein F OS=Homo sapiens OX=9606 GN=HNRNPF PE=1 SV=3 - [HNRPF_HUMAN]	1	1	P52597		HCD	1	0	1	1	0	0.000235	44	49	2.2	0	60	54	3428000	2	815.862	1630.72	0	-2.17	26.31	7797	7797	MS2	0/0	0	0	hela_waters_3.raw
High	A	2	LTAEEMDER	4437	Unambiguous	Ras GTPase-activating-like protein IQGAP1 OS=Homo sapiens OX=9606 GN=IQGAP1 PE=1 SV=1 - [IQGA1_HUMAN]	1	1	P46940		HCD	1	0	1	1	0	1.78e-06	77	55	2.11	0	32	7	24120000	2	547.248	1093.49	0	5.13	26.31	7799	7799	MS2	0/0	0	0	hela_waters_3.raw
High	A	2	EMEAELEDERK	4445	Unambiguous	Myosin-9 OS=Homo sapiens OX=9606 GN=MYH9 PE=1 SV=4 - [MYH9_HUMAN]	1	1	P35579		HCD	1	0	1	1	0	4.21e-16	60	73	3.3	1	39	41	11830000	2	689.811	1378.62	0	0.06	26.32	7804	7804	MS2	0/0	0	0	hela_waters_3.raw
High	A	2	QAYTQFGGK	4447	Unambiguous	Proteasome subunit alpha type-4 OS=Homo sapiens OX=9606 GN=PSMA4 PE=1 SV=1 - [PSA4_HUMAN]	1	1	P25789		HCD	1	0	1	1	0	0.000139	112	97	1.77	0	41	5	23670000	2	500.249	999.491	0	1.62	26.32	7805	7805	MS2	0/0	0	0	hela_waters_3.raw
High	A	2	IIAPPER	4449	Unambiguous	Actin, alpha cardiac muscle 1 OS=Homo sapiens OX=9606 GN=ACTC1 PE=1 SV=1 - [ACTC_HUMAN]|Beta-actin-like protein 2 OS=Homo sapiens OX=9606 GN=ACTBL2 PE=1 SV=2 - [ACTBL_HUMAN]|Actin, cytoplasmic 1 OS=Homo sapiens OX=9606 GN=ACTB PE=1 SV=1 - [ACTB_HUMAN]	7	3	P68032;Q562R1;P60709		HCD	1	0	1	1	0.006	0.0728	61	60	1.94	0	20	17	14650000	2	398.24	795.474	0	1.5	26.33	7806	7806	MS2	0/0	0	0	hela_waters_3.raw
High	A	2	AQYEDIANR	4453	Unambiguous	Keratin, type II cytoskeletal 8 OS=Homo sapiens OX=9606 GN=KRT8 PE=1 SV=7 - [K2C8_HUMAN]	2	1	P05787		HCD	1	0	1	1	0	4.33e-06	138	131	2.09	0	28	2	107700000	2	540.26	1079.51	0	1.24	26.33	7809	7809	MS2	0/0	0	0	hela_waters_3.raw
High	A	2	QQEVETELK	4455	Unambiguous	U1 small nuclear ribonucleoprotein 70 kDa OS=Homo sapiens OX=9606 GN=SNRNP70 PE=1 SV=2 - [RU17_HUMAN]	1	1	P08621		HCD	1	0	1	1	0.002	0.015	215	221	1.8	0	39	10	23500000	2	552.283	1103.56	0	1.52	26.34	7810	7810	MS2	0/0	0	0	hela_waters_3.raw
High	A	2	LEcVEPNcR	3904	Unambiguous	60S ribosomal protein L36a OS=Homo sapiens OX=9606 GN=RPL36A PE=1 SV=2 - [RL36A_HUMAN]	2	1	P83881	C3(Carbamidomethyl); C8(Carbamidomethyl)	HCD	1	0	1	1	0	8.08e-07	46	46	2.37	0	33	9	16120000	2	588.76	1176.51	0	-0.26	26.34	7813	7813	MS2	0/0	0	0	hela_waters_3.raw
High	A	2	TTEEQVQASTPcPR	4463	Unambiguous	Ribosome biogenesis protein BOP1 OS=Homo sapiens OX=9606 GN=BOP1 PE=1 SV=2 - [BOP1_HUMAN]	1	1	Q14137	C12(Carbamidomethyl)	HCD	1	0	1	1	0	8.11e-15	107	120	2.6	0	20	59	3294000	2	802.376	1603.75	0	4.54	26.35	7815	7815	MS2	0/0	0	0	hela_waters_3.raw
Middle	A	2	VSLQVHPDR	4466	Unambiguous	DnaJ homolog subfamily C member 9 OS=Homo sapiens OX=9606 GN=DNAJC9 PE=1 SV=1 - [DNJC9_HUMAN]	1	1	Q8WXX5		HCD	1	0	1	2	0.012	0.182	143	149	1.16	0	6	60	2576000	3	350.862	1050.57	0	2.83	26.35	7817	7817	MS2	0/0	0	0	hela_waters_3.raw
High	A	2	ASNGDAWVEAHGK	4057	Unambiguous	Stress-70 protein, mitochondrial OS=Homo sapiens OX=9606 GN=HSPA9 PE=1 SV=2 - [GRP75_HUMAN]	1	1	P38646		HCD	1	0	1	1	0	2.28e-06	97	99	1.7	0	51	52	5829000	2	671.312	1341.62	0	-1.23	26.35	7819	7819	MS2	0/0	0	0	hela_waters_3.raw
High	A	2	AGFAGDDAPR	3936	Unambiguous	Actin, alpha cardiac muscle 1 OS=Homo sapiens OX=9606 GN=ACTC1 PE=1 SV=1 - [ACTC_HUMAN]|Actin, cytoplasmic 1 OS=Homo sapiens OX=9606 GN=ACTB PE=1 SV=1 - [ACTB_HUMAN]	10	2	P68032;P60709		HCD	1	0	1	1	0	3.87e-09	74	86	1.56	0	25	1	203100000	2	488.729	976.45	0	2.06	26.36	7821	7821	MS2	0/0	0	0	hela_waters_3.raw
Middle	A	2	DWHRPcLK	4369	Unambiguous	Cysteine-rich protein 1 OS=Homo sapiens OX=9606 GN=CRIP1 PE=1 SV=3 - [CRIP1_HUMAN]	1	1	P50238	C6(Carbamidomethyl)	HCD	1	0	1	1	0.013	0.2	140	147	1.35	0	48	5	27020000	2	556.278	1111.55	0	1.93	26.36	7824	7824	MS2	0/0	0	0	hela_waters_3.raw
High	A	2	YLAEVAcGDDRK	4480	Unambiguous	14-3-3 protein theta OS=Homo sapiens OX=9606 GN=YWHAQ PE=1 SV=1 - [1433T_HUMAN]	1	1	P27348	C7(Carbamidomethyl)	HCD	1	0	1	1	0	2.23e-07	130	136	2.65	1	22	41	11450000	2	698.831	1396.65	0	1.07	26.36	7825	7825	MS2	0/0	0	0	hela_waters_3.raw
Middle	A	2	EATTNAPFR	4486	Unambiguous	Leukocyte elastase inhibitor OS=Homo sapiens OX=9606 GN=SERPINB1 PE=1 SV=1 - [ILEU_HUMAN]	1	1	P30740		HCD	1	0	1	1	0.019	0.26	215	220	1.46	0	53	12	8339000	2	503.752	1006.5	0	1.52	26.37	7828	7828	MS2	0/0	0	0	hela_waters_3.raw
High	A	2	YTcSFcGK	3942	Unambiguous	60S ribosomal protein L37a OS=Homo sapiens OX=9606 GN=RPL37A PE=1 SV=2 - [RL37A_HUMAN]	2	1	P61513	C3(Carbamidomethyl); C6(Carbamidomethyl)	HCD	1	0	1	1	0.001	0.00836	18	9	1.36	0	55	18	9130000	2	511.709	1022.41	0	3.1	26.38	7831	7831	MS2	0/0	0	0	hela_waters_3.raw
High	A	2	cFSEENHEPLR	4375	Unambiguous	Vacuolar protein sorting-associated protein 35 OS=Homo sapiens OX=9606 GN=VPS35 PE=1 SV=2 - [VPS35_HUMAN]	1	1	Q96QK1	C1(Carbamidomethyl)	HCD	1	0	1	1	0	0.0048	49	59	1.66	0	27	53	4583000	2	709.315	1417.62	0	4.1	26.38	7832	7832	MS2	0/0	0	0	hela_waters_3.raw
High	A	2	LDNNWGR	4494	Unambiguous	Galectin-3 OS=Homo sapiens OX=9606 GN=LGALS3 PE=1 SV=5 - [LEG3_HUMAN]	1	1	P17931		HCD	1	0	1	1	0	0.00421	115	104	1.84	0	34	6	27630000	2	437.713	874.418	0	1.44	26.38	7834	7834	MS2	0/0	0	0	hela_waters_3.raw
High	A	2	LPEGDLGK	4496	Unambiguous	Eukaryotic translation initiation factor 5A-1 OS=Homo sapiens OX=9606 GN=EIF5A PE=1 SV=2 - [IF5A1_HUMAN]	2	1	P63241		HCD	1	0	1	1	0.001	0.0128	83	89	1.57	0	22	6	31300000	2	414.727	828.447	0	1.11	26.39	7835	7835	MS2	0/0	0	0	hela_waters_3.raw
High	A	2	YLSEVASGDNK	4502	Unambiguous	14-3-3 protein beta/alpha OS=Homo sapiens OX=9606 GN=YWHAB PE=1 SV=3 - [1433B_HUMAN]	1	1	P31946		HCD	1	0	1	1	0.001	0.00757	123	131	1.66	0	48	3	35930000	2	591.784	1182.56	0	-2.36	26.39	7838	7838	MS2	0/0	0	0	hela_waters_3.raw
High	A	2	YESLTDPSK	4506	Unambiguous	Heat shock protein HSP 90-beta OS=Homo sapiens OX=9606 GN=HSP90AB1 PE=1 SV=4 - [HS90B_HUMAN]|Heat shock protein HSP 90-alpha OS=Homo sapiens OX=9606 GN=HSP90AA1 PE=1 SV=5 - [HS90A_HUMAN]|Putative heat shock protein HSP 90-beta 4 OS=Homo sapiens OX=9606 GN=HSP90AB4P PE=5 SV=1 - [H90B4_HUMAN]	5	2	P08238;P07900		HCD	1	0	1	1	0	0.000693	127	125	1.63	0	35	5	29300000	2	520.252	1039.5	0	3.1	26.39	7840	7840	MS2	0/0	0	0	hela_waters_3.raw
High	A	2	HELQANcYEEVK	4510	Unambiguous	Cofilin-1 OS=Homo sapiens OX=9606 GN=CFL1 PE=1 SV=3 - [COF1_HUMAN]	1	1	P23528	C7(Carbamidomethyl)	HCD	1	0	1	1	0	4.21e-16	70	59	3.44	0	42	43	11420000	2	760.347	1519.69	0	1.05	26.39	7842	7842	MS2	0/0	0	0	hela_waters_3.raw
High	A	2	YEAANWK	4512	Unambiguous	Proteasome subunit alpha type-6 OS=Homo sapiens OX=9606 GN=PSMA6 PE=1 SV=1 - [PSA6_HUMAN]	1	1	P60900		HCD	1	0	1	1	0.007	0.0781	116	107	1.07	0	51	22	6971000	2	441.212	881.417	0	1.58	26.4	7844	7844	MS2	0/0	0	0	hela_waters_3.raw
High	A	2	VDNSSLTGESEPQTR	4520	Unambiguous	Sodium/potassium-transporting ATPase subunit alpha-1 OS=Homo sapiens OX=9606 GN=ATP1A1 PE=1 SV=1 - [AT1A1_HUMAN]	4	1	P05023		HCD	1	0	1	1	0	4.21e-16	102	113	3.15	0	5	51	5835000	2	810.379	1619.75	0	-0.24	26.41	7849	7849	MS2	0/0	0	0	hela_waters_3.raw
High	A	2	IQVWHEEHR	4017	Unambiguous	Moesin OS=Homo sapiens OX=9606 GN=MSN PE=1 SV=3 - [MOES_HUMAN]	1	1	P26038		HCD	1	0	1	1	0.003	0.0346	195	181	1.64	0	11	46	5469000	3	411.876	1233.61	0	0	26.42	7853	7853	MS2	0/0	0	0	hela_waters_3.raw
High	A	2	GIPHLVTHDAR	4526	Unambiguous	40S ribosomal protein S4, X isoform OS=Homo sapiens OX=9606 GN=RPS4X PE=1 SV=2 - [RS4X_HUMAN]	3	1	P62701		HCD	1	0	1	1	0	4.52e-08	265	275	2	0	37	7	23590000	3	405.891	1215.66	0	0	26.42	7854	7854	MS2	0/0	0	0	hela_waters_3.raw
High	A	2	YLAEVAcGDDRK	4480	Unambiguous	14-3-3 protein theta OS=Homo sapiens OX=9606 GN=YWHAQ PE=1 SV=1 - [1433T_HUMAN]	1	1	P27348	C7(Carbamidomethyl)	HCD	1	0	1	1	0.003	0.0413	122	129	1.77	1	54	8	21570000	3	466.223	1396.65	0	0.78	26.42	7855	7855	MS2	0/0	0	0	hela_waters_3.raw
High	A	2	EATNPPVIQEEKPK	4532	Unambiguous	Protein disulfide-isomerase A3 OS=Homo sapiens OX=9606 GN=PDIA3 PE=1 SV=4 - [PDIA3_HUMAN]	1	1	P30101		HCD	1	0	1	1	0	4.26e-13	207	198	2.14	0	29	53	5629000	2	790.42	1579.83	0	-0.39	26.43	7857	7857	MS2	0/0	0	0	hela_waters_3.raw
High	A	2	VLTGVAGEDAEcHAAK	4534	Unambiguous	Importin-7 OS=Homo sapiens OX=9606 GN=IPO7 PE=1 SV=1 - [IPO7_HUMAN]	1	1	O95373	C12(Carbamidomethyl)	HCD	1	0	1	1	0	4.21e-16	154	168	2.81	0	0	50	6152000	2	814.393	1627.78	0	2.35	26.43	7858	7858	MS2	0/0	0	0	hela_waters_3.raw
High	A	2	DSYVGDEAQSK	2761	Unambiguous	Actin, alpha cardiac muscle 1 OS=Homo sapiens OX=9606 GN=ACTC1 PE=1 SV=1 - [ACTC_HUMAN]|Actin, cytoplasmic 1 OS=Homo sapiens OX=9606 GN=ACTB PE=1 SV=1 - [ACTB_HUMAN]	6	2	P68032;P60709		HCD	1	0	1	1	0	4.06e-07	62	58	1.82	0	42	7	25440000	2	599.765	1198.52	0	1.11	26.43	7860	7860	MS2	0/0	0	0	hela_waters_3.raw
High	A	2	MVTGDNINTAR	4540	Unambiguous	Plasma membrane calcium-transporting ATPase 1 OS=Homo sapiens OX=9606 GN=ATP2B1 PE=1 SV=4 - [AT2B1_HUMAN]	4	1	P20020		HCD	1	0	1	1	0	9.34e-07	165	160	1.97	0	81	60	3244000	2	596.294	1191.58	0	1.19	26.44	7862	7862	MS2	0/0	0	0	hela_waters_3.raw
High	A	2	QLETLGQEK	4542	Unambiguous	Keratin, type II cytoskeletal 8 OS=Homo sapiens OX=9606 GN=KRT8 PE=1 SV=7 - [K2C8_HUMAN]	1	1	P05787		HCD	1	0	1	1	0	0.000375	269	253	1.75	0	27	5	52390000	2	523.28	1045.55	0	0.77	26.44	7864	7864	MS2	0/0	0	0	hela_waters_3.raw
High	A	2	TNEAQAIETAR	3921	Unambiguous	Ubiquitin-conjugating enzyme E2 N OS=Homo sapiens OX=9606 GN=UBE2N PE=1 SV=1 - [UBE2N_HUMAN]	2	1	P61088		HCD	1	0	1	1	0	4.21e-16	194	207	2.74	0	34	8	22740000	2	602.302	1203.6	0	-0.39	26.45	7865	7865	MS2	0/0	0	0	hela_waters_3.raw
High	A	2	VLATVTKPVGGDK	4546	Unambiguous	60S ribosomal protein L6 OS=Homo sapiens OX=9606 GN=RPL6 PE=1 SV=3 - [RL6_HUMAN]	1	1	Q02878		HCD	1	0	1	1	0	0.00018	117	125	1.95	0	70	57	4387000	2	642.88	1284.75	0	-0.01	26.45	7866	7866	MS2	0/0	0	0	hela_waters_3.raw
High	A	2	LFQEccPHSTDR	4548	Unambiguous	Heterogeneous nuclear ribonucleoprotein K OS=Homo sapiens OX=9606 GN=HNRNPK PE=1 SV=1 - [HNRPK_HUMAN]	1	1	P61978	C5(Carbamidomethyl); C6(Carbamidomethyl)	HCD	1	0	1	1	0	5.69e-14	37	19	2.65	0	19	53	5902000	2	775.331	1549.66	0	2.2	26.45	7867	7867	MS2	0/0	0	0	hela_waters_3.raw
High	A	2	VLANPGNSQVAR	4055	Unambiguous	Importin subunit beta-1 OS=Homo sapiens OX=9606 GN=KPNB1 PE=1 SV=2 - [IMB1_HUMAN]	1	1	Q14974		HCD	1	0	1	1	0	1.22e-11	128	126	2.21	0	37	50	12010000	2	613.337	1225.67	0	1.51	26.46	7871	7871	MS2	0/0	0	0	hela_waters_3.raw
High	A	2	NQQITHANNTVSNFK	4558	Unambiguous	Heat shock protein 105 kDa OS=Homo sapiens OX=9606 GN=HSPH1 PE=1 SV=1 - [HS105_HUMAN]	1	1	Q92598		HCD	1	0	1	1	0	5.92e-15	169	157	2.99	0	25	53	2558000	2	858.426	1715.85	0	-0.44	26.46	7873	7873	MS2	0/0	0	0	hela_waters_3.raw
High	A	2	TNYNDRYDEIR	4560	Unambiguous	60S ribosomal protein L7a OS=Homo sapiens OX=9606 GN=RPL7A PE=1 SV=2 - [RL7A_HUMAN]	1	1	P62424		HCD	1	0	1	1	0.002	0.0216	94	85	2.69	1	33	42	9930000	2	729.835	1458.66	0	1.91	26.46	7874	7874	MS2	0/0	0	0	hela_waters_3.raw
High	A	2	GEIDAHEDSFK	4564	Unambiguous	Spectrin alpha chain, non-erythrocytic 1 OS=Homo sapiens OX=9606 GN=SPTAN1 PE=1 SV=3 - [SPTN1_HUMAN]	1	1	Q13813		HCD	1	0	1	1	0	0.0033	63	54	1.83	0	59	53	6874000	2	624.281	1247.55	0	0.55	26.46	7876	7876	MS2	0/0	0	0	hela_waters_3.raw
High	A	2	LQSIGTENTEENRR	3455	Unambiguous	Fructose-bisphosphate aldolase A OS=Homo sapiens OX=9606 GN=ALDOA PE=1 SV=2 - [ALDOA_HUMAN]	1	1	P04075		HCD	1	0	1	1	0.007	0.075	175	216	1.31	1	0	56	3264000	2	823.91	1646.81	0	1.51	26.47	7878	7878	MS2	0/0	0	0	hela_waters_3.raw
High	A	2	TTHFVEGGDAGNREDQINR	3854	Unambiguous	60S ribosomal protein L7 OS=Homo sapiens OX=9606 GN=RPL7 PE=1 SV=1 - [RL7_HUMAN]	1	1	P18124		HCD	1	0	1	1	0.002	0.0137	106	116	2.66	1	27	42	9472000	3	705.998	2115.98	0	0.08	26.47	7879	7879	MS2	0/0	0	0	hela_waters_3.raw
High	A	2	MSAEDIEK	4570	Unambiguous	Malignant T-cell-amplified sequence 1 OS=Homo sapiens OX=9606 GN=MCTS1 PE=1 SV=1 - [MCTS1_HUMAN]	1	1	Q9ULC4		HCD	1	0	1	1	0.001	0.0101	73	97	0.86	0	51	12	10640000	2	461.714	922.42	0	1.6	26.47	7880	7880	MS2	0/0	0	0	hela_waters_3.raw
High	A	2	VLATVTKPVGGDK	4546	Unambiguous	60S ribosomal protein L6 OS=Homo sapiens OX=9606 GN=RPL6 PE=1 SV=3 - [RL6_HUMAN]	1	1	Q02878		HCD	1	0	1	1	0	6.69e-13	117	125	2.16	0	12	60	16510000	3	428.923	1284.75	0	0.79	26.48	7882	7882	MS2	0/0	0	0	hela_waters_3.raw
High	A	2	IVYPTEK	4574	Unambiguous	LIM and SH3 domain protein 1 OS=Homo sapiens OX=9606 GN=LASP1 PE=1 SV=2 - [LASP1_HUMAN]	1	1	Q14847		HCD	1	0	1	1	0.006	0.0703	132	133	1.4	0	47	24	8247000	2	425.24	849.473	0	1.07	26.48	7883	7883	MS2	0/0	0	0	hela_waters_3.raw
High	A	2	EAMEDGEIDGNK	4093	Unambiguous	Nucleolin OS=Homo sapiens OX=9606 GN=NCL PE=1 SV=3 - [NUCL_HUMAN]	1	1	P19338		HCD	1	0	1	1	0	2.7e-08	29	29	2.36	0	52	13	16640000	2	654.275	1307.54	0	0.16	26.49	7888	7888	MS2	0/0	0	0	hela_waters_3.raw
High	A	2	EVYQQQQYGSGGR	3156	Unambiguous	Heterogeneous nuclear ribonucleoprotein A/B OS=Homo sapiens OX=9606 GN=HNRNPAB PE=1 SV=2 - [ROAA_HUMAN]	1	1	Q99729		HCD	1	0	1	1	0	9.51e-13	71	77	1.96	0	46	57	1614000	2	750.342	1499.68	0	-6.48	26.49	7889	7889	MS2	0/0	0	0	hela_waters_3.raw
High	A	2	HELQANcYEEVK	4510	Unambiguous	Cofilin-1 OS=Homo sapiens OX=9606 GN=CFL1 PE=1 SV=3 - [COF1_HUMAN]	1	1	P23528	C7(Carbamidomethyl)	HCD	1	0	1	1	0.002	0.0199	73	60	1.49	0	47	8	29750000	3	507.234	1519.69	0	1.64	26.5	7891	7891	MS2	0/0	0	0	hela_waters_3.raw
High	A	2	ADLDVSGPK	4590	Unambiguous	Neuroblast differentiation-associated protein AHNAK OS=Homo sapiens OX=9606 GN=AHNAK PE=1 SV=2 - [AHNK_HUMAN]	1	1	Q09666		HCD	1	0	1	1	0	2.4e-08	94	111	1.92	0	56	5	18530000	2	451.235	901.462	0	-0.9	26.5	7892	7892	MS2	0/0	0	0	hela_waters_3.raw
High	A	2	ADIDVSGPK	4590	Unambiguous	Neuroblast differentiation-associated protein AHNAK OS=Homo sapiens OX=9606 GN=AHNAK PE=1 SV=2 - [AHNK_HUMAN]	1	1	Q09666		HCD	1	0	1	2	0	2.4e-08	94	111	1.92	0	56	5	18530000	2	451.235	901.462	0	-0.9	26.5	7892	7892	MS2	0/0	0	0	hela_waters_3.raw
High	A	2	HVGDLGNVTADK	4601	Unambiguous	Superoxide dismutase [Cu-Zn] OS=Homo sapiens OX=9606 GN=SOD1 PE=1 SV=2 - [SODC_HUMAN]	1	1	P00441		HCD	1	0	1	1	0	6.42e-06	158	163	2.18	0	61	21	9309000	2	613.312	1225.62	0	-0.77	26.5	7896	7896	MS2	0/0	0	0	hela_waters_3.raw
High	A	2	AAESVSKPDVSEEAPGPSK	4603	Unambiguous	Protein RTF2 homolog OS=Homo sapiens OX=9606 GN=RTFDC1 PE=1 SV=3 - [RTF2_HUMAN]	1	1	Q9BY42		HCD	1	0	1	1	0.009	0.11	180	190	1.02	0	0	60	3284000	2	942.958	1884.91	0	-4.73	26.51	7897	7897	MS2	0/0	0	0	hela_waters_3.raw
High	A	2	VTLPDGK	4605	Unambiguous	Threonine--tRNA ligase, cytoplasmic OS=Homo sapiens OX=9606 GN=TARS PE=1 SV=3 - [SYTC_HUMAN]	1	1	P26639		HCD	1	0	1	1	0.006	0.0735	84	93	1.35	0	34	52	2823000	2	365.21	729.412	0	-2.34	26.51	7898	7898	MS2	0/0	0	0	hela_waters_3.raw
High	A	2	HQGVMVGMGQK	2468	Unambiguous	Actin, alpha cardiac muscle 1 OS=Homo sapiens OX=9606 GN=ACTC1 PE=1 SV=1 - [ACTC_HUMAN]|Beta-actin-like protein 2 OS=Homo sapiens OX=9606 GN=ACTBL2 PE=1 SV=2 - [ACTBL_HUMAN]|Actin, cytoplasmic 1 OS=Homo sapiens OX=9606 GN=ACTB PE=1 SV=1 - [ACTB_HUMAN]	7	3	P68032;Q562R1;P60709		HCD	1	0	1	1	0	8.07e-12	125	121	2.72	0	8	3	76570000	2	586.289	1171.57	0	-0.14	26.51	7900	7900	MS2	0/0	0	0	hela_waters_3.raw
High	A	2	QTYSTEPNNLK	4121	Unambiguous	60S ribosomal protein L28 OS=Homo sapiens OX=9606 GN=RPL28 PE=1 SV=3 - [RL28_HUMAN]	1	1	P46779		HCD	1	0	1	1	0	5.47e-08	168	174	2.12	0	0	41	15730000	2	647.818	1294.63	0	1.67	26.51	7901	7901	MS2	0/0	0	0	hela_waters_3.raw
High	A	2	YYPTEDVPRK	4377	Unambiguous	60S ribosomal protein L6 OS=Homo sapiens OX=9606 GN=RPL6 PE=1 SV=3 - [RL6_HUMAN]	1	1	Q02878		HCD	1	0	1	1	0.002	0.0158	164	160	1.89	1	45	46	9814000	2	634.32	1267.63	0	0.67	26.52	7902	7902	MS2	0/0	0	0	hela_waters_3.raw
High	A	2	LNFSHGTHEYHAETIK	4613	Unambiguous	Pyruvate kinase PKM OS=Homo sapiens OX=9606 GN=PKM PE=1 SV=4 - [KPYM_HUMAN]	1	1	P14618		HCD	1	0	1	1	0	8.59e-13	163	179	2.11	0	17	3	57760000	4	471.732	1883.91	0	0.87	26.52	7904	7904	MS2	0/0	0	0	hela_waters_3.raw
High	A	2	LNFSHGTHEYHAETIK	4613	Unambiguous	Pyruvate kinase PKM OS=Homo sapiens OX=9606 GN=PKM PE=1 SV=4 - [KPYM_HUMAN]	1	1	P14618		HCD	1	0	1	1	0	4.21e-16	168	188	4.12	0	5	28	34030000	3	628.639	1883.9	0	-0.03	26.52	7905	7905	MS2	0/0	0	0	hela_waters_3.raw
High	A	2	NIIHGSDSVESAEK	4129	Unambiguous	Nucleoside diphosphate kinase A OS=Homo sapiens OX=9606 GN=NME1 PE=1 SV=1 - [NDKA_HUMAN]	1	1	P15531		HCD	1	0	1	1	0	4.21e-16	135	139	2.74	0	6	34	15540000	2	743.363	1485.72	0	0.84	26.52	7906	7906	MS2	0/0	0	0	hela_waters_3.raw
High	A	2	LIQNLDANHDGR	4621	Unambiguous	Protein S100-A16 OS=Homo sapiens OX=9606 GN=S100A16 PE=1 SV=1 - [S10AG_HUMAN]	1	1	Q96FQ6		HCD	1	0	1	1	0	2.93e-15	219	234	2.8	0	17	13	18360000	3	455.901	1365.69	0	0.85	26.53	7908	7908	MS2	0/0	0	0	hela_waters_3.raw
High	A	2	VSGAQEMVSSAK	4623	Unambiguous	Perilipin-3 OS=Homo sapiens OX=9606 GN=PLIN3 PE=1 SV=3 - [PLIN3_HUMAN]	1	1	O60664		HCD	1	0	1	1	0	4.21e-16	214	195	2.74	0	35	42	13470000	2	597.297	1193.59	0	2.9	26.53	7909	7909	MS2	0/0	0	0	hela_waters_3.raw
High	A	2	GVEEEEEDGEMRE	4625	Unambiguous	Small nuclear ribonucleoprotein F OS=Homo sapiens OX=9606 GN=SNRPF PE=1 SV=1 - [RUXF_HUMAN]	1	1	P62306		HCD	1	0	1	1	0	1.04e-14	6	5	2.89	1	8	40	13110000	2	769.301	1537.6	0	-0.46	26.53	7910	7910	MS2	0/0	0	0	hela_waters_3.raw
High	A	2	SQLLGSAHEVQR	4631	Unambiguous	Spectrin alpha chain, non-erythrocytic 1 OS=Homo sapiens OX=9606 GN=SPTAN1 PE=1 SV=3 - [SPTN1_HUMAN]	1	1	Q13813		HCD	1	0	1	1	0	4.21e-16	168	188	3.03	0	19	48	7801000	2	662.852	1324.7	0	-0.2	26.53	7913	7913	MS2	0/0	0	0	hela_waters_3.raw
High	A	2	TVLDQQQTPSR	3944	Unambiguous	Leucine-rich PPR motif-containing protein, mitochondrial OS=Homo sapiens OX=9606 GN=LRPPRC PE=1 SV=3 - [LPPRC_HUMAN]	1	1	P42704		HCD	1	0	1	1	0	0.000685	209	194	1.53	0	26	53	5738000	2	636.831	1272.65	0	0.32	26.53	7914	7914	MS2	0/0	0	0	hela_waters_3.raw
High	A	2	ETAENYLGHTAK	4637	Unambiguous	Stress-70 protein, mitochondrial OS=Homo sapiens OX=9606 GN=HSPA9 PE=1 SV=2 - [GRP75_HUMAN]	1	1	P38646		HCD	1	0	1	1	0	6.07e-12	140	136	2.54	0	23	31	21550000	2	667.323	1333.64	0	0.31	26.54	7916	7916	MS2	0/0	0	0	hela_waters_3.raw
High	A	2	EASDPQPEEADGGLK	4641	Unambiguous	F-actin-capping protein subunit alpha-1 OS=Homo sapiens OX=9606 GN=CAPZA1 PE=1 SV=3 - [CAZA1_HUMAN]	1	1	P52907		HCD	1	0	1	1	0	1.66e-11	69	73	2.27	0	53	52	5428000	2	771.849	1542.69	0	-0.53	26.54	7918	7918	MS2	0/0	0	0	hela_waters_3.raw
High	A	2	HQGVMVGMGQK	2468	Unambiguous	Actin, alpha cardiac muscle 1 OS=Homo sapiens OX=9606 GN=ACTC1 PE=1 SV=1 - [ACTC_HUMAN]|Beta-actin-like protein 2 OS=Homo sapiens OX=9606 GN=ACTBL2 PE=1 SV=2 - [ACTBL_HUMAN]|Actin, cytoplasmic 1 OS=Homo sapiens OX=9606 GN=ACTB PE=1 SV=1 - [ACTB_HUMAN]	7	3	P68032;Q562R1;P60709		HCD	1	0	1	1	0	0.00301	117	107	2.38	0	17	22	15440000	3	391.196	1171.57	0	0.92	26.55	7920	7920	MS2	0/0	0	0	hela_waters_3.raw
High	A	2	IYHPNIDEK	4650	Unambiguous	Ubiquitin-conjugating enzyme E2 L3 OS=Homo sapiens OX=9606 GN=UBE2L3 PE=1 SV=1 - [UB2L3_HUMAN]	2	1	P68036		HCD	1	0	1	1	0.005	0.0563	182	168	1.4	0	52	40	15170000	2	564.788	1128.57	0	0.19	26.55	7923	7923	MS2	0/0	0	0	hela_waters_3.raw
High	A	2	ETKPEPMEEDLPENKK	4652	Unambiguous	Stress-induced-phosphoprotein 1 OS=Homo sapiens OX=9606 GN=STIP1 PE=1 SV=1 - [STIP1_HUMAN]	1	1	P31948		HCD	1	0	1	1	0	4.81e-06	152	149	3.01	1	26	41	12510000	3	638.643	1913.92	0	-0.14	26.55	7924	7924	MS2	0/0	0	0	hela_waters_3.raw
High	A	2	HSLNSSSASTTEPDFQK	4656	Unambiguous	Leucine-rich PPR motif-containing protein, mitochondrial OS=Homo sapiens OX=9606 GN=LRPPRC PE=1 SV=3 - [LPPRC_HUMAN]	1	1	P42704		HCD	1	0	1	1	0	3.26e-05	133	122	2.2	0	29	58	4311000	2	918.425	1835.84	0	1.37	26.55	7926	7926	MS2	0/0	0	0	hela_waters_3.raw
High	A	2	SNVSDAVAQSTR	4662	Unambiguous	Triosephosphate isomerase OS=Homo sapiens OX=9606 GN=TPI1 PE=1 SV=3 - [TPIS_HUMAN]	1	1	P60174		HCD	1	0	1	1	0	4.39e-14	160	171	2.61	0	17	6	64900000	2	617.804	1234.6	0	-0.73	26.56	7930	7930	MS2	0/0	0	0	hela_waters_3.raw
High	A	2	AVTEQGAELSNEER	4664	Unambiguous	14-3-3 protein theta OS=Homo sapiens OX=9606 GN=YWHAQ PE=1 SV=1 - [1433T_HUMAN]	1	1	P27348		HCD	1	0	1	1	0	4.21e-16	136	141	3.18	0	3	8	39400000	2	766.863	1532.72	0	0.17	26.57	7931	7931	MS2	0/0	0	0	hela_waters_3.raw
High	A	2	HEQNIDcGGGYVK	3581	Unambiguous	Calreticulin OS=Homo sapiens OX=9606 GN=CALR PE=1 SV=1 - [CALR_HUMAN]	1	1	P27797	C7(Carbamidomethyl)	HCD	1	0	1	1	0	1.22e-15	55	60	2.74	0	44	37	13220000	2	738.83	1476.65	0	-0.69	26.57	7932	7932	MS2	0/0	0	0	hela_waters_3.raw
High	A	2	TKFETEQALR	4668	Unambiguous	Keratin, type I cytoskeletal 17 OS=Homo sapiens OX=9606 GN=KRT17 PE=1 SV=2 - [K1C17_HUMAN]|Keratin, type I cytoskeletal 19 OS=Homo sapiens OX=9606 GN=KRT19 PE=1 SV=4 - [K1C19_HUMAN]	2	2	Q04695;P08727		HCD	1	0	1	1	0	0.00259	188	209	2.19	1	19	60	5862000	3	408.219	1222.64	0	0.84	26.57	7934	7934	MS2	0/0	0	0	hela_waters_3.raw
High	A	2	DAIAQAVR	4674	Unambiguous	Transketolase OS=Homo sapiens OX=9606 GN=TKT PE=1 SV=3 - [TKT_HUMAN]	1	1	P29401		HCD	1	0	1	1	0.002	0.0134	175	183	2.08	0	17	13	20540000	2	422.238	843.469	0	0.61	26.58	7937	7937	MS2	0/0	0	0	hela_waters_3.raw
High	A	2	NNASTDYDLSDK	4676	Unambiguous	60S ribosomal protein L3 OS=Homo sapiens OX=9606 GN=RPL3 PE=1 SV=2 - [RL3_HUMAN]	1	1	P39023		HCD	1	0	1	1	0	2.62e-14	43	38	2.7	0	31	34	19330000	2	671.791	1342.58	0	-0.21	26.58	7938	7938	MS2	0/0	0	0	hela_waters_3.raw
High	A	2	NSSTYWEGK	4678	Unambiguous	Threonine--tRNA ligase, cytoplasmic OS=Homo sapiens OX=9606 GN=TARS PE=1 SV=3 - [SYTC_HUMAN]	1	1	P26639		HCD	1	0	1	1	0.002	0.0181	52	48	1.02	0	64	11	11600000	2	536.24	1071.47	0	-0.48	26.58	7939	7939	MS2	0/0	0	0	hela_waters_3.raw
High	A	2	LIQNLDANHDGR	4621	Unambiguous	Protein S100-A16 OS=Homo sapiens OX=9606 GN=S100A16 PE=1 SV=1 - [S10AG_HUMAN]	1	1	Q96FQ6		HCD	1	0	1	1	0	4.21e-16	215	230	2.82	0	41	15	14660000	2	683.347	1365.69	0	0.48	26.58	7940	7940	MS2	0/0	0	0	hela_waters_3.raw
High	A	2	NEEPSEEEIDAPKPK	4684	Unambiguous	Nucleolar RNA helicase 2 OS=Homo sapiens OX=9606 GN=DDX21 PE=1 SV=5 - [DDX21_HUMAN]	1	1	Q9NR30		HCD	1	0	1	1	0	7.19e-05	133	147	1.92	0	0	60	3309000	2	856.406	1711.81	0	2.06	26.58	7942	7942	MS2	0/0	0	0	hela_waters_3.raw
Middle	A	2	QDAQSLHGDIPQK	4686	Unambiguous	Nucleolar RNA helicase 2 OS=Homo sapiens OX=9606 GN=DDX21 PE=1 SV=5 - [DDX21_HUMAN]	1	1	Q9NR30		HCD	1	0	1	1	0.042	0.594	163	195	1.73	0	64	58	2803000	2	718.861	1436.72	0	1.73	26.59	7943	7943	MS2	0/0	0	0	hela_waters_3.raw
High	A	2	EGALcEENMR	4695	Unambiguous	Elongation factor 2 OS=Homo sapiens OX=9606 GN=EEF2 PE=1 SV=4 - [EF2_HUMAN]	1	1	P13639	C5(Carbamidomethyl)	HCD	1	0	1	1	0	6.13e-11	23	24	2.93	0	26	8	36820000	2	604.756	1208.5	0	1.08	26.6	7948	7948	MS2	0/0	0	0	hela_waters_3.raw
High	A	2	SSGSPYGGGYGSGGGSGGYGSR	4697	Unambiguous	Heterogeneous nuclear ribonucleoprotein A3 OS=Homo sapiens OX=9606 GN=HNRNPA3 PE=1 SV=2 - [ROA3_HUMAN]	1	1	P51991		HCD	1	0	1	1	0	4.21e-16	24	28	4.49	0	28	60	4696000	2	955.896	1910.79	0	-2.28	26.6	7949	7949	MS2	0/0	0	0	hela_waters_3.raw
High	A	2	ETKPEPMEEDLPENKK	4652	Unambiguous	Stress-induced-phosphoprotein 1 OS=Homo sapiens OX=9606 GN=STIP1 PE=1 SV=1 - [STIP1_HUMAN]	1	1	P31948		HCD	1	0	1	1	0	0.00417	164	147	1.72	1	38	60	4014000	2	957.468	1913.93	0.01	6.69	26.61	7952	7952	MS2	0/0	0	0	hela_waters_3.raw
High	A	2	cYEMASHLR	4703	Unambiguous	Profilin-1 OS=Homo sapiens OX=9606 GN=PFN1 PE=1 SV=2 - [PROF1_HUMAN]	1	1	P07737	C1(Carbamidomethyl)	HCD	1	0	1	1	0	1.72e-09	65	59	2.59	0	19	8	23540000	3	389.507	1166.51	0	-0.48	26.61	7954	7954	MS2	0/0	0	0	hela_waters_3.raw
High	A	2	cYEMASHLR	4703	Unambiguous	Profilin-1 OS=Homo sapiens OX=9606 GN=PFN1 PE=1 SV=2 - [PROF1_HUMAN]	1	1	P07737	C1(Carbamidomethyl)	HCD	1	0	1	1	0	3.49e-10	61	56	2.49	0	30	7	35410000	2	583.757	1166.51	0	-1.31	26.62	7957	7957	MS2	0/0	0	0	hela_waters_3.raw
High	A	2	YKPESEELTAER	4232	Unambiguous	Protein disulfide-isomerase OS=Homo sapiens OX=9606 GN=P4HB PE=1 SV=3 - [PDIA1_HUMAN]	1	1	P07237		HCD	1	0	1	1	0	6.96e-11	176	161	1.9	0	22	43	9559000	2	726.354	1451.7	0	-0.41	26.62	7958	7958	MS2	0/0	0	0	hela_waters_3.raw
High	A	2	HEAFESDLAAHQDR	4715	Unambiguous	Alpha-actinin-1 OS=Homo sapiens OX=9606 GN=ACTN1 PE=1 SV=2 - [ACTN1_HUMAN]|Alpha-actinin-4 OS=Homo sapiens OX=9606 GN=ACTN4 PE=1 SV=2 - [ACTN4_HUMAN]|Alpha-actinin-2 OS=Homo sapiens OX=9606 GN=ACTN2 PE=1 SV=1 - [ACTN2_HUMAN]	4	2	P12814;O43707		HCD	1	0	1	1	0	4.21e-16	64	66	3.31	0	0	51	5687000	2	813.369	1625.73	0	0.33	26.62	7960	7960	MS2	0/0	0	0	hela_waters_3.raw
High	A	2	AVTEQGHELSNEER	2788	Unambiguous	14-3-3 protein beta/alpha OS=Homo sapiens OX=9606 GN=YWHAB PE=1 SV=3 - [1433B_HUMAN]	1	1	P31946		HCD	1	0	1	1	0	4.04e-09	121	132	2.43	0	33	57	3972000	2	799.875	1598.74	0	1.5	26.63	7964	7964	MS2	0/0	0	0	hela_waters_3.raw
High	A	2	EVATNSELVQSGK	4723	Unambiguous	Keratin, type I cytoskeletal 17 OS=Homo sapiens OX=9606 GN=KRT17 PE=1 SV=2 - [K1C17_HUMAN]	2	1	Q04695		HCD	1	0	1	1	0	4.21e-16	218	208	2.75	0	10	7	56730000	2	681.35	1361.69	0	0.87	26.63	7965	7965	MS2	0/0	0	0	hela_waters_3.raw
High	A	2	HTGPNSPDTANDGFVR	4725	Unambiguous	Heterogeneous nuclear ribonucleoprotein H2 OS=Homo sapiens OX=9606 GN=HNRNPH2 PE=1 SV=1 - [HNRH2_HUMAN]|Heterogeneous nuclear ribonucleoprotein H OS=Homo sapiens OX=9606 GN=HNRNPH1 PE=1 SV=4 - [HNRH1_HUMAN]	2	2	P55795;P31943		HCD	1	0	1	1	0	4.21e-16	92	88	3.4	0	20	10	20350000	3	562.259	1684.76	0	-2.27	26.63	7966	7966	MS2	0/0	0	0	hela_waters_3.raw
High	A	2	HRPELIEYDK	4727	Unambiguous	Alpha-actinin-4 OS=Homo sapiens OX=9606 GN=ACTN4 PE=1 SV=2 - [ACTN4_HUMAN]	1	1	O43707		HCD	1	0	1	1	0	0.00393	162	169	2.23	0	15	7	18830000	3	433.895	1299.67	0	2.04	26.63	7967	7967	MS2	0/0	0	0	hela_waters_3.raw
High	A	2	VSPEEAIK	4729	Unambiguous	Eukaryotic translation initiation factor 2 subunit 1 OS=Homo sapiens OX=9606 GN=EIF2S1 PE=1 SV=3 - [IF2A_HUMAN]	1	1	P05198		HCD	1	0	1	1	0.001	0.0123	133	153	1.07	0	70	9	11000000	2	436.74	872.474	0	1.44	26.63	7968	7968	MS2	0/0	0	0	hela_waters_3.raw
High	A	2	EAKPDELMDSK	4731	Unambiguous	Vesicle-associated membrane protein-associated protein A OS=Homo sapiens OX=9606 GN=VAPA PE=1 SV=3 - [VAPA_HUMAN]	1	1	Q9P0L0		HCD	1	0	1	1	0	6.01e-05	125	126	1.51	0	57	59	4559000	2	631.802	1262.6	0	2.56	26.64	7969	7969	MS2	0/0	0	0	hela_waters_3.raw
High	A	2	HRPELIEYDK	4727	Unambiguous	Alpha-actinin-4 OS=Homo sapiens OX=9606 GN=ACTN4 PE=1 SV=2 - [ACTN4_HUMAN]	1	1	O43707		HCD	1	0	1	1	0	4.25e-05	163	169	3.06	0	13	42	12150000	2	650.34	1299.67	0	2.36	26.64	7970	7970	MS2	0/0	0	0	hela_waters_3.raw
High	A	2	LAVDEEENADNNTK	3983	Unambiguous	Transferrin receptor protein 1 OS=Homo sapiens OX=9606 GN=TFRC PE=1 SV=2 - [TFR1_HUMAN]	1	1	P02786		HCD	1	0	1	1	0	2.38e-06	75	64	1.6	0	51	49	6076000	2	781.356	1561.71	0	4.9	26.64	7972	7972	MS2	0/0	0	0	hela_waters_3.raw
Middle	A	2	FGPQTLER	4740	Unambiguous	Laminin subunit alpha-5 OS=Homo sapiens OX=9606 GN=LAMA5 PE=1 SV=8 - [LAMA5_HUMAN]	1	1	O15230		HCD	1	0	1	2	0.046	0.637	236	252	1.05	0	48	5	39780000	2	474.246	947.486	0	-9.34	26.65	7974	7974	MS2	0/0	0	0	hela_waters_3.raw
High	A	2	TPGPGAQSALR	4013	Unambiguous	40S ribosomal protein S14 OS=Homo sapiens OX=9606 GN=RPS14 PE=1 SV=3 - [RS14_HUMAN]	1	1	P62263		HCD	1	0	1	1	0	1.34e-05	161	161	1.94	0	76	4	20120000	2	527.787	1054.57	0	2.06	26.65	7975	7975	MS2	0/0	0	0	hela_waters_3.raw
High	A	2	VNTLIRPDGEK	4744	Unambiguous	60S ribosomal protein L23a OS=Homo sapiens OX=9606 GN=RPL23A PE=1 SV=1 - [RL23A_HUMAN]	1	1	P62750		HCD	1	0	1	1	0	6.31e-10	174	168	2.63	0	42	10	38220000	2	621.346	1241.69	0	0.47	26.65	7977	7977	MS2	0/0	0	0	hela_waters_3.raw
High	A	2	EAHEPLAVADAK	4748	Unambiguous	Nucleolar protein 58 OS=Homo sapiens OX=9606 GN=NOP58 PE=1 SV=1 - [NOP58_HUMAN]	1	1	Q9Y2X3		HCD	1	0	1	1	0	1.47e-06	196	191	2.47	0	48	47	10190000	2	625.822	1250.64	0	-0.19	26.66	7979	7979	MS2	0/0	0	0	hela_waters_3.raw
High	A	2	HTGPNSPDTANDGFVR	4725	Unambiguous	Heterogeneous nuclear ribonucleoprotein H2 OS=Homo sapiens OX=9606 GN=HNRNPH2 PE=1 SV=1 - [HNRH2_HUMAN]|Heterogeneous nuclear ribonucleoprotein H OS=Homo sapiens OX=9606 GN=HNRNPH1 PE=1 SV=4 - [HNRH1_HUMAN]	2	2	P55795;P31943		HCD	1	0	1	1	0	4.21e-16	103	103	2.85	0	36	11	27130000	2	842.888	1684.77	0	0.97	26.66	7980	7980	MS2	0/0	0	0	hela_waters_3.raw
High	A	2	FRPDMEEEEAK	4752	Unambiguous	Proteasome subunit beta type-7 OS=Homo sapiens OX=9606 GN=PSMB7 PE=1 SV=1 - [PSB7_HUMAN]	1	1	Q99436		HCD	1	0	1	1	0.001	0.0115	73	67	2.01	0	37	15	13290000	3	460.875	1380.61	0	1.05	26.66	7981	7981	MS2	0/0	0	0	hela_waters_3.raw
High	A	2	TAIHEVMEQGR	4754	Unambiguous	DNA replication licensing factor MCM3 OS=Homo sapiens OX=9606 GN=MCM3 PE=1 SV=3 - [MCM3_HUMAN]	1	1	P25205		HCD	1	0	1	1	0	2.16e-06	124	119	2.58	0	65	51	7457000	2	635.816	1270.63	0	3.74	26.66	7982	7982	MS2	0/0	0	0	hela_waters_3.raw
High	A	2	ILEQEEEEEQAGKPGEPSK	4764	Unambiguous	Serrate RNA effector molecule homolog OS=Homo sapiens OX=9606 GN=SRRT PE=1 SV=1 - [SRRT_HUMAN]	1	1	Q9BXP5		HCD	1	0	1	1	0.002	0.0165	156	144	2.34	0	7	45	7038000	3	709.675	2127.01	0	0.53	26.67	7987	7987	MS2	0/0	0	0	hela_waters_3.raw
High	A	2	LDDPScPRPEcYR	4766	Unambiguous	Eukaryotic translation initiation factor 2 subunit 3 OS=Homo sapiens OX=9606 GN=EIF2S3 PE=1 SV=3 - [IF2G_HUMAN]	1	1	P41091	C6(Carbamidomethyl); C11(Carbamidomethyl)	HCD	1	0	1	1	0.002	0.0187	38	33	1.29	0	44	54	4877000	2	832.862	1664.72	0	1.03	26.67	7988	7988	MS2	0/0	0	0	hela_waters_3.raw
High	A	2	NMMAAcDPR	4302	Unambiguous	Tubulin beta-2A chain OS=Homo sapiens OX=9606 GN=TUBB2A PE=1 SV=1 - [TBB2A_HUMAN]|Tubulin beta-3 chain OS=Homo sapiens OX=9606 GN=TUBB3 PE=1 SV=2 - [TBB3_HUMAN]|Tubulin beta-4A chain OS=Homo sapiens OX=9606 GN=TUBB4A PE=1 SV=2 - [TBB4A_HUMAN]|Tubulin beta-4B chain OS=Homo sapiens OX=9606 GN=TUBB4B PE=1 SV=1 - [TBB4B_HUMAN]|Tubulin beta chain OS=Homo sapiens OX=9606 GN=TUBB PE=1 SV=2 - [TBB5_HUMAN…	9	3	P68371;P07437;Q9BUF5	C6(Carbamidomethyl)	HCD	1	0	1	1	0	0.00467	13	12	1.93	0	20	7	44650000	2	533.217	1065.43	0	-0.66	26.68	7991	7991	MS2	0/0	0	0	hela_waters_3.raw
High	A	2	VTLTSEEEAR	4776	Unambiguous	L-lactate dehydrogenase A chain OS=Homo sapiens OX=9606 GN=LDHA PE=1 SV=2 - [LDHA_HUMAN]	1	1	P00338		HCD	1	0	1	1	0	1.46e-14	215	202	2.21	0	13	2	123900000	2	567.785	1134.56	0	-0.21	26.68	7994	7994	MS2	0/0	0	0	hela_waters_3.raw
High	A	2	AQAAAPASVPAQAPK	4778	Unambiguous	60S ribosomal protein L29 OS=Homo sapiens OX=9606 GN=RPL29 PE=1 SV=2 - [RL29_HUMAN]	1	1	P47914		HCD	1	0	1	1	0	9.34e-16	200	226	2.65	0	16	5	55520000	2	689.377	1377.75	0	-0.97	26.68	7995	7995	MS2	0/0	0	0	hela_waters_3.raw
High	A	2	SDPVVSYR	4780	Unambiguous	Elongation factor 2 OS=Homo sapiens OX=9606 GN=EEF2 PE=1 SV=4 - [EF2_HUMAN]	1	1	P13639		HCD	1	0	1	1	0.001	0.00597	136	139	1.65	0	49	5	21160000	2	461.736	922.464	0	1.63	26.68	7996	7996	MS2	0/0	0	0	hela_waters_3.raw
High	A	2	NQNSWGTGEDVK	4784	Unambiguous	Lamin-B1 OS=Homo sapiens OX=9606 GN=LMNB1 PE=1 SV=2 - [LMNB1_HUMAN]	1	1	P20700		HCD	1	0	1	1	0	1.43e-12	64	62	2.1	0	62	15	13100000	2	667.802	1334.6	0	-0.16	26.69	7998	7998	MS2	0/0	0	0	hela_waters_3.raw
High	A	2	GNLGAGNGNLQGPR	4786	Unambiguous	Matrin-3 OS=Homo sapiens OX=9606 GN=MATR3 PE=1 SV=2 - [MATR3_HUMAN]	1	1	P43243		HCD	1	0	1	1	0	4.21e-16	178	173	3.34	0	41	41	13010000	2	662.838	1324.67	0	-2.14	26.69	7999	7999	MS2	0/0	0	0	hela_waters_3.raw
High	A	2	NMSVIAHVDHGK	4289	Unambiguous	Elongation factor 2 OS=Homo sapiens OX=9606 GN=EEF2 PE=1 SV=4 - [EF2_HUMAN]	1	1	P13639		HCD	1	0	1	1	0.001	0.0129	212	203	1.79	0	45	14	12210000	3	436.555	1307.65	0	-0.92	26.69	8000	8000	MS2	0/0	0	0	hela_waters_3.raw
High	A	2	NQVGDENWR	4792	Unambiguous	Transportin-1 OS=Homo sapiens OX=9606 GN=TNPO1 PE=1 SV=2 - [TNPO1_HUMAN]	1	1	Q92973		HCD	1	0	1	1	0	2.52e-05	52	58	2.16	0	74	18	8917000	2	559.255	1117.5	0	0.84	26.69	8002	8002	MS2	0/0	0	0	hela_waters_3.raw
High	A	2	VEHSDLSFSK	4794	Unambiguous	Beta-2-microglobulin OS=Homo sapiens OX=9606 GN=B2M PE=1 SV=1 - [B2MG_HUMAN]	1	1	P61769		HCD	1	0	1	1	0	0.00367	152	159	1.71	0	22	26	7007000	3	383.524	1148.56	0	-0.91	26.69	8003	8003	MS2	0/0	0	0	hela_waters_3.raw
High	A	2	GPPQEEEEEEDEEEEATK	4796	Unambiguous	Hepatoma-derived growth factor OS=Homo sapiens OX=9606 GN=HDGF PE=1 SV=1 - [HDGF_HUMAN]	1	1	P51858		HCD	1	0	1	1	0	3.57e-12		4	2.24	0	19	60	3227000	2	1052.42	2103.83	0	-4.37	26.69	8004	8004	MS2	0/0	0	0	hela_waters_3.raw
High	A	2	SAVENcQDSWR	4798	Unambiguous	6-phosphogluconate dehydrogenase, decarboxylating OS=Homo sapiens OX=9606 GN=PGD PE=1 SV=3 - [6PGD_HUMAN]	1	1	P52209	C6(Carbamidomethyl)	HCD	1	0	1	1	0	1.79e-07	24	18	2.46	0	63	60	3257000	2	676.288	1351.57	0	-1.15	26.7	8005	8005	MS2	0/0	0	0	hela_waters_3.raw
High	A	2	AAEAAAAPAESAAPAAGEEPSK	4808	Unambiguous	Brain acid soluble protein 1 OS=Homo sapiens OX=9606 GN=BASP1 PE=1 SV=2 - [BASP1_HUMAN]	1	1	P80723		HCD	1	0	1	1	0	4.21e-16	139	144	3.63	0	55	60	6270000	2	983.972	1966.94	0	0.55	26.71	8011	8011	MS2	0/0	0	0	hela_waters_3.raw
High	A	2	YFDPANGK	4810	Unambiguous	Elongation factor 2 OS=Homo sapiens OX=9606 GN=EEF2 PE=1 SV=4 - [EF2_HUMAN]	1	1	P13639		HCD	1	0	1	1	0.002	0.018	89	81	1.37	0	39	4	42510000	2	456.217	911.426	0	0.24	26.71	8012	8012	MS2	0/0	0	0	hela_waters_3.raw
High	A	2	SVTEQGAELSNEER	4818	Unambiguous	14-3-3 protein zeta/delta OS=Homo sapiens OX=9606 GN=YWHAZ PE=1 SV=1 - [1433Z_HUMAN]	1	1	P63104		HCD	1	0	1	1	0	4.21e-16	111	95	3.62	0	31	44	10500000	2	774.859	1548.71	0	-1.75	26.71	8015	8015	MS2	0/0	0	0	hela_waters_3.raw
High	A	2	VSYGIGDEEHDQEGR	4822	Unambiguous	DNA-(apurinic or apyrimidinic site) lyase OS=Homo sapiens OX=9606 GN=APEX1 PE=1 SV=2 - [APEX1_HUMAN]	1	1	P27695		HCD	1	0	1	1	0	1.29e-15	46	24	2.23	0	37	55	5386000	2	845.867	1690.73	0	-1.66	26.72	8017	8017	MS2	0/0	0	0	hela_waters_3.raw
High	A	2	FNAHGDANTIVcNSK	4824	Unambiguous	Galectin-1 OS=Homo sapiens OX=9606 GN=LGALS1 PE=1 SV=2 - [LEG1_HUMAN]	1	1	P09382	C12(Carbamidomethyl)	HCD	1	0	1	1	0	1.21e-12	101	94	3.14	0	21	57	3870000	2	824.378	1647.75	0	-3.63	26.72	8018	8018	MS2	0/0	0	0	hela_waters_3.raw
High	A	2	QGANINEIR	4826	Unambiguous	Poly(rC)-binding protein 1 OS=Homo sapiens OX=9606 GN=PCBP1 PE=1 SV=2 - [PCBP1_HUMAN]	1	1	Q15365		HCD	1	0	1	1	0	3.46e-09	124	119	2.11	0	59	4	27040000	2	507.77	1014.53	0	0.75	26.72	8019	8019	MS2	0/0	0	0	hela_waters_3.raw
High	A	2	LLEVEHPAAK	4828	Unambiguous	T-complex protein 1 subunit alpha OS=Homo sapiens OX=9606 GN=TCP1 PE=1 SV=1 - [TCPA_HUMAN]	1	1	P17987		HCD	1	0	1	1	0	1.55e-05	138	143	1.76	0	18	59	6697000	3	369.545	1106.62	0	-0.25	26.72	8020	8020	MS2	0/0	0	0	hela_waters_3.raw
High	A	2	INISEGNcPER	4830	Unambiguous	Poly(rC)-binding protein 1 OS=Homo sapiens OX=9606 GN=PCBP1 PE=1 SV=2 - [PCBP1_HUMAN]|Poly(rC)-binding protein 2 OS=Homo sapiens OX=9606 GN=PCBP2 PE=1 SV=1 - [PCBP2_HUMAN]	3	2	Q15365;Q15366	C8(Carbamidomethyl)	HCD	1	0	1	1	0	1.05e-11	92	84	2.82	0	74	56	5705000	2	644.799	1288.59	0	-2.61	26.72	8021	8021	MS2	0/0	0	0	hela_waters_3.raw
High	A	2	QGIETPEDQNDLRK	4832	Unambiguous	Splicing factor 1 OS=Homo sapiens OX=9606 GN=SF1 PE=1 SV=4 - [SF01_HUMAN]	1	1	Q15637		HCD	1	0	1	1	0.002	0.0194	142	136	1.94	1	11	58	3493000	2	821.903	1642.8	0	-2.32	26.72	8022	8022	MS2	0/0	0	0	hela_waters_3.raw
High	A	2	LIEVDDERK	4251	Unambiguous	40S ribosomal protein S6 OS=Homo sapiens OX=9606 GN=RPS6 PE=1 SV=1 - [RS6_HUMAN]	1	1	P62753		HCD	1	0	1	1	0.002	0.014	255	249	1.89	1	49	60	2389000	3	372.868	1116.59	0	1.21	26.73	8026	8026	MS2	0/0	0	0	hela_waters_3.raw
Middle	A	2	EVSTYIK	4840	Unambiguous	Elongation factor 1-alpha 1 OS=Homo sapiens OX=9606 GN=EEF1A1 PE=1 SV=1 - [EF1A1_HUMAN]	2	1	P68104		HCD	1	0	1	1	0.03	0.388	125	142	1.17	0	7	4	52520000	2	420.229	839.452	0	0.71	26.73	8027	8027	MS2	0/0	0	0	hela_waters_3.raw
High	A	2	SLQSVAEER	4844	Unambiguous	60S ribosomal protein L15 OS=Homo sapiens OX=9606 GN=RPL15 PE=1 SV=2 - [RL15_HUMAN]	1	1	P61313		HCD	1	0	1	1	0	0.00322	202	211	2.08	0	44	24	9759000	2	509.762	1018.52	0	-0.37	26.74	8030	8030	MS2	0/0	0	0	hela_waters_3.raw
High	A	2	FNAHGDANTIVcNSK	4824	Unambiguous	Galectin-1 OS=Homo sapiens OX=9606 GN=LGALS1 PE=1 SV=2 - [LEG1_HUMAN]	1	1	P09382	C12(Carbamidomethyl)	HCD	1	0	1	1	0	6.22e-06	105	106	2.52	0	39	21	8436000	3	549.924	1647.76	0	1.18	26.74	8031	8031	MS2	0/0	0	0	hela_waters_3.raw
Middle	A	2	EIAQDFK	4848	Unambiguous	Histone H3.1 OS=Homo sapiens OX=9606 GN=HIST1H3A PE=1 SV=2 - [H31_HUMAN]	4	1	P68431		HCD	1	0	1	1	0.025	0.348	128	145	1.55	0	67	20	6413000	2	425.72	850.433	0	2.84	26.74	8032	8032	MS2	0/0	0	0	hela_waters_3.raw
High	A	2	ETPAATEAPSSTPK	3188	Unambiguous	Brain acid soluble protein 1 OS=Homo sapiens OX=9606 GN=BASP1 PE=1 SV=2 - [BASP1_HUMAN]	1	1	P80723		HCD	1	0	1	1	0	1.36e-14	141	135	2.74	0	0	45	12050000	2	693.842	1386.68	0	0.93	26.75	8034	8034	MS2	0/0	0	0	hela_waters_3.raw
High	A	2	IcDEcNYGSYQGR	4862	Unambiguous	PHD finger-like domain-containing protein 5A OS=Homo sapiens OX=9606 GN=PHF5A PE=1 SV=1 - [PHF5A_HUMAN]	1	1	Q7RTV0	C2(Carbamidomethyl); C5(Carbamidomethyl)	HCD	1	0	1	1	0	4.21e-16	8	9	2.52	0	29	56	2617000	2	811.32	1621.63	0	-2.48	26.77	8042	8042	MS2	0/0	0	0	hela_waters_3.raw
High	A	2	YTIENPR	4870	Unambiguous	Staphylococcal nuclease domain-containing protein 1 OS=Homo sapiens OX=9606 GN=SND1 PE=1 SV=1 - [SND1_HUMAN]	1	1	Q7KZF4		HCD	1	0	1	1	0.002	0.0132	200	226	1.35	0	58	12	9279000	2	446.729	892.451	0	-1.11	26.77	8045	8045	MS2	0/0	0	0	hela_waters_3.raw
Middle	A	2	LAQALHEMR	4270	Unambiguous	Lamin-B1 OS=Homo sapiens OX=9606 GN=LMNB1 PE=1 SV=2 - [LMNB1_HUMAN]	1	1	P20700		HCD	1	0	1	1	0.036	0.469	132	144	1.5	0	64	60	1567000	3	356.859	1068.56	0	1.19	26.78	8051	8051	MS2	0/0	0	0	hela_waters_3.raw
High	A	2	GSGTAEVELK	4885	Unambiguous	Pyruvate kinase PKM OS=Homo sapiens OX=9606 GN=PKM PE=1 SV=4 - [KPYM_HUMAN]	1	1	P14618		HCD	1	0	1	1	0	4.54e-05	228	215	1.53	0	39	3	41280000	2	495.761	990.515	0	4.65	26.78	8053	8053	MS2	0/0	0	0	hela_waters_3.raw
High	A	2	IANPVEGSTDR	4887	Unambiguous	Poly(rC)-binding protein 2 OS=Homo sapiens OX=9606 GN=PCBP2 PE=1 SV=1 - [PCBP2_HUMAN]	1	1	Q15366		HCD	1	0	1	1	0	2.77e-12	137	141	2.2	0	43	8	19310000	2	579.792	1158.58	0	2	26.79	8054	8054	MS2	0/0	0	0	hela_waters_3.raw
High	A	2	LHNAIEGGTQLSR	4889	Unambiguous	H/ACA ribonucleoprotein complex subunit DKC1 OS=Homo sapiens OX=9606 GN=DKC1 PE=1 SV=3 - [DKC1_HUMAN]	1	1	O60832		HCD	1	0	1	1	0	0.000817	191	166	2.15	0	47	48	7644000	2	698.368	1395.73	0	-3.43	26.79	8055	8055	MS2	0/0	0	0	hela_waters_3.raw
High	A	2	YRPGTVALR	4410	Unambiguous	Histone H3.1 OS=Homo sapiens OX=9606 GN=HIST1H3A PE=1 SV=2 - [H31_HUMAN]	5	1	P68431		HCD	1	0	1	1	0.002	0.0153	167	173	1.91	0	3	1	421900000	2	516.802	1032.6	0	1.5	26.79	8057	8057	MS2	0/0	0	0	hela_waters_3.raw
High	A	2	ESEPQAAAEPAEAK	3463	Unambiguous	Brain acid soluble protein 1 OS=Homo sapiens OX=9606 GN=BASP1 PE=1 SV=2 - [BASP1_HUMAN]	1	1	P80723		HCD	1	0	1	1	0	1.12e-11	96	98	2.38	0	23	43	11300000	2	714.338	1427.67	0	1.97	26.79	8058	8058	MS2	0/0	0	0	hela_waters_3.raw
High	A	2	ISSDLDGHPVPK	4895	Unambiguous	Transketolase OS=Homo sapiens OX=9606 GN=TKT PE=1 SV=3 - [TKT_HUMAN]	1	1	P29401		HCD	1	0	1	1	0.006	0.0683	225	218	1.53	0	56	8	13130000	3	422.223	1264.65	0	0.71	26.8	8059	8059	MS2	0/0	0	0	hela_waters_3.raw
High	A	2	ISSDLDGHPVPK	4895	Unambiguous	Transketolase OS=Homo sapiens OX=9606 GN=TKT PE=1 SV=3 - [TKT_HUMAN]	1	1	P29401		HCD	1	0	1	1	0	1.55e-08	225	218	2.13	0	26	43	12190000	2	632.831	1264.65	0	0.86	26.8	8060	8060	MS2	0/0	0	0	hela_waters_3.raw
High	A	2	NSMPASSFQQQK	4899	Unambiguous	Putative RNA-binding protein Luc7-like 2 OS=Homo sapiens OX=9606 GN=LUC7L2 PE=1 SV=2 - [LC7L2_HUMAN]	2	1	Q9Y383		HCD	1	0	1	1	0	0.000347	114	121	2.57	0	65	18	11350000	2	676.818	1352.63	0	1.45	26.8	8061	8061	MS2	0/0	0	0	hela_waters_3.raw
High	A	2	DNQLSEVANK	4901	Unambiguous	Nucleolar and coiled-body phosphoprotein 1 OS=Homo sapiens OX=9606 GN=NOLC1 PE=1 SV=2 - [NOLC1_HUMAN]	1	1	Q14978		HCD	1	0	1	1	0.002	0.0135	150	153	1.71	0	56	8	9092000	2	559.28	1117.55	0	3.34	26.8	8062	8062	MS2	0/0	0	0	hela_waters_3.raw
High	A	2	TQPMTAQAASYR	4903	Unambiguous	RNA-binding protein 14 OS=Homo sapiens OX=9606 GN=RBM14 PE=1 SV=2 - [RBM14_HUMAN]	1	1	Q96PK6		HCD	1	0	1	1	0	9.37e-11	156	147	2.69	0	47	16	14910000	2	662.818	1324.63	0	-1.8	26.81	8064	8064	MS2	0/0	0	0	hela_waters_3.raw
High	A	2	LALSQNQQSSGAAGPTGK	4905	Unambiguous	Luc7-like protein 3 OS=Homo sapiens OX=9606 GN=LUC7L3 PE=1 SV=2 - [LC7L3_HUMAN]	1	1	O95232		HCD	1	0	1	1	0	4.21e-16	203	221	2.32	0	24	53	3622000	2	857.939	1714.87	0	-0.96	26.81	8065	8065	MS2	0/0	0	0	hela_waters_3.raw
High	A	2	VAEDEAEAAAAAK	4907	Unambiguous	4F2 cell-surface antigen heavy chain OS=Homo sapiens OX=9606 GN=SLC3A2 PE=1 SV=3 - [4F2_HUMAN]	1	1	P08195		HCD	1	0	1	1	0	4.38e-10	112	125	1.8	0	67	48	6831000	2	623.301	1245.6	0	-0.25	26.81	8066	8066	MS2	0/0	0	0	hela_waters_3.raw
High	A	2	FGQGGAGPVGGQGPR	4909	Unambiguous	Splicing factor, proline- and glutamine-rich OS=Homo sapiens OX=9606 GN=SFPQ PE=1 SV=2 - [SFPQ_HUMAN]	1	1	P23246		HCD	1	0	1	1	0	3.3e-12	170	173	2.72	0	33	11	31220000	2	671.337	1341.67	0	0.57	26.81	8067	8067	MS2	0/0	0	0	hela_waters_3.raw
High	A	2	LQSIGTENTEENR	4256	Unambiguous	Fructose-bisphosphate aldolase A OS=Homo sapiens OX=9606 GN=ALDOA PE=1 SV=2 - [ALDOA_HUMAN]	1	1	P04075		HCD	1	0	1	1	0	4.21e-16	155	148	3.09	0	43	9	22690000	2	745.858	1490.71	0	0.39	26.81	8068	8068	MS2	0/0	0	0	hela_waters_3.raw
High	A	2	YHPGYFGK	4402	Unambiguous	60S ribosomal protein L27a OS=Homo sapiens OX=9606 GN=RPL27A PE=1 SV=2 - [RL27A_HUMAN]	1	1	P46776		HCD	1	0	1	1	0.002	0.0269	85	81	1.17	0	68	14	9971000	2	484.736	968.465	0	2.92	26.82	8070	8070	MS2	0/0	0	0	hela_waters_3.raw
High	A	2	LTIAEER	4917	Unambiguous	40S ribosomal protein S4, X isoform OS=Homo sapiens OX=9606 GN=RPS4X PE=1 SV=2 - [RS4X_HUMAN]	2	1	P62701		HCD	1	0	1	1	0.001	0.00736	261	265	1.78	0	49	7	22270000	2	416.233	831.458	0	0.85	26.82	8072	8072	MS2	0/0	0	0	hela_waters_3.raw
High	A	2	LTEGcSFR	4921	Unambiguous	40S ribosomal protein S27 OS=Homo sapiens OX=9606 GN=RPS27 PE=1 SV=3 - [RS27_HUMAN]	2	1	P42677	C5(Carbamidomethyl)	HCD	1	0	1	1	0.001	0.00569	92	91	1.53	0	56	14	11840000	2	485.225	969.443	0	-2.62	26.82	8074	8074	MS2	0/0	0	0	hela_waters_3.raw
Middle	A	2	LSQAEER	4925	Unambiguous	Sodium channel and clathrin linker 1 OS=Homo sapiens OX=9606 GN=SCLT1 PE=1 SV=2 - [SCLT1_HUMAN]	1	1	Q96NL6		HCD	1	0	1	1	0.036	0.464	227	210	1.25	0	64	5	18400000	2	416.714	832.421	0	6.35	26.83	8077	8077	MS2	0/0	0	0	hela_waters_3.raw
High	A	2	ETMQSLNDR	3808	Unambiguous	Keratin, type I cytoskeletal 18 OS=Homo sapiens OX=9606 GN=KRT18 PE=1 SV=2 - [K1C18_HUMAN]	2	1	P05783		HCD	1	0	1	1	0	0.00392	80	61	1.57	0	62	17	6715000	2	547.249	1093.49	0	-3.01	26.83	8078	8078	MS2	0/0	0	0	hela_waters_3.raw
High	A	2	AEAGPEGVAPAPEGEK	4929	Unambiguous	Hypoxia up-regulated protein 1 OS=Homo sapiens OX=9606 GN=HYOU1 PE=1 SV=1 - [HYOU1_HUMAN]	1	1	Q9Y4L1		HCD	1	0	1	1	0	4.43e-12	157	161	1.93	0	47	50	6348000	2	754.866	1508.73	0	1.61	26.83	8079	8079	MS2	0/0	0	0	hela_waters_3.raw
High	A	2	IIAPPER	4449	Unambiguous	Actin, alpha cardiac muscle 1 OS=Homo sapiens OX=9606 GN=ACTC1 PE=1 SV=1 - [ACTC_HUMAN]|Beta-actin-like protein 2 OS=Homo sapiens OX=9606 GN=ACTBL2 PE=1 SV=2 - [ACTBL_HUMAN]|Actin, cytoplasmic 1 OS=Homo sapiens OX=9606 GN=ACTB PE=1 SV=1 - [ACTB_HUMAN]	7	3	P68032;Q562R1;P60709		HCD	1	0	1	1	0.005	0.062	61	60	1.85	0	8	2	130700000	2	398.24	795.473	0	1.04	26.84	8083	8083	MS2	0/0	0	0	hela_waters_3.raw
High	A	2	AQYEDIANR	4453	Unambiguous	Keratin, type II cytoskeletal 8 OS=Homo sapiens OX=9606 GN=KRT8 PE=1 SV=7 - [K2C8_HUMAN]	2	1	P05787		HCD	1	0	1	1	0	7.37e-05	126	118	1.62	0	54	3	38660000	2	540.26	1079.51	0	0.22	26.84	8084	8084	MS2	0/0	0	0	hela_waters_3.raw
High	A	2	VLEDSDLK	4939	Unambiguous	Endoplasmic reticulum chaperone BiP OS=Homo sapiens OX=9606 GN=HSPA5 PE=1 SV=2 - [BIP_HUMAN]	1	1	P11021		HCD	1	0	1	1	0	0.00522	302	271	1.23	0	38	3	44520000	2	459.744	918.48	0	2.32	26.85	8086	8086	MS2	0/0	0	0	hela_waters_3.raw
High	A	2	LSSEMNTSTVNSAR	4943	Unambiguous	Lamin-B1 OS=Homo sapiens OX=9606 GN=LMNB1 PE=1 SV=2 - [LMNB1_HUMAN]	1	1	P20700		HCD	1	0	1	1	0	4.21e-16	132	143	3.25	0	32	43	9615000	2	748.854	1496.7	0	0.22	26.85	8087	8087	MS2	0/0	0	0	hela_waters_3.raw
Middle	A	2	ILQEGVDPK	4951	Unambiguous	Trifunctional enzyme subunit alpha, mitochondrial OS=Homo sapiens OX=9606 GN=HADHA PE=1 SV=2 - [ECHA_HUMAN]	1	1	P40939		HCD	1	0	1	1	0.023	0.316	104	96	1.12	0	75	6	8934000	2	499.78	998.553	0	1.16	26.86	8091	8091	MS2	0/0	0	0	hela_waters_3.raw
High	A	2	LDGAHAPELTK	4953	Unambiguous	Glutaredoxin-3 OS=Homo sapiens OX=9606 GN=GLRX3 PE=1 SV=2 - [GLRX3_HUMAN]	1	1	O76003		HCD	1	0	1	1	0.003	0.0301	182	207	1.38	0	46	59	4571000	3	384.54	1151.61	0	0.31	26.86	8092	8092	MS2	0/0	0	0	hela_waters_3.raw
High	A	2	AGFAGDDAPR	3936	Unambiguous	Actin, alpha cardiac muscle 1 OS=Homo sapiens OX=9606 GN=ACTC1 PE=1 SV=1 - [ACTC_HUMAN]|Actin, cytoplasmic 1 OS=Homo sapiens OX=9606 GN=ACTB PE=1 SV=1 - [ACTB_HUMAN]	10	2	P68032;P60709		HCD	1	0	1	1	0	3.01e-11	81	92	1.52	0	15	2	104300000	2	488.729	976.45	0	1.87	26.87	8097	8097	MS2	0/0	0	0	hela_waters_3.raw
High	A	2	LSVDYGK	4963	Unambiguous	Tubulin alpha-1A chain OS=Homo sapiens OX=9606 GN=TUBA1A PE=1 SV=1 - [TBA1A_HUMAN]|Tubulin alpha-1B chain OS=Homo sapiens OX=9606 GN=TUBA1B PE=1 SV=1 - [TBA1B_HUMAN]|Tubulin alpha-1C chain OS=Homo sapiens OX=9606 GN=TUBA1C PE=1 SV=1 - [TBA1C_HUMAN]|Tubulin alpha-4A chain OS=Homo sapiens OX=9606 GN=TUBA4A PE=1 SV=1 - [TBA4A_HUMAN]	5	2	Q9BQE3;P68366		HCD	1	0	1	1	0.002	0.0208	132	140	1.41	0	16	3	72530000	2	391.209	781.41	0	0.82	26.87	8098	8098	MS2	0/0	0	0	hela_waters_3.raw
High	A	2	LKDDEVAQLK	4946	Unambiguous	L-lactate dehydrogenase B chain OS=Homo sapiens OX=9606 GN=LDHB PE=1 SV=2 - [LDHB_HUMAN]	1	1	P07195		HCD	1	0	1	1	0.001	0.00858	274	269	1.29	1	49	2	54560000	2	579.822	1158.64	0	0.19	26.87	8099	8099	MS2	0/0	0	0	hela_waters_3.raw
High	A	2	ERHPGSFDVVHVK	4967	Unambiguous	40S ribosomal protein S4, X isoform OS=Homo sapiens OX=9606 GN=RPS4X PE=1 SV=2 - [RS4X_HUMAN]	2	1	P62701		HCD	1	0	1	1	0	0.00299	189	194	2.29	1	43	25	5667000	3	502.933	1506.78	0	1.36	26.87	8100	8100	MS2	0/0	0	0	hela_waters_3.raw
High	A	2	KPDTIEVQQMK	4971	Unambiguous	Ezrin OS=Homo sapiens OX=9606 GN=EZR PE=1 SV=4 - [EZRI_HUMAN]|Moesin OS=Homo sapiens OX=9606 GN=MSN PE=1 SV=3 - [MOES_HUMAN]|Radixin OS=Homo sapiens OX=9606 GN=RDX PE=1 SV=1 - [RADI_HUMAN]	3	3	P15311;P26038;P35241		HCD	1	0	1	1	0	4.21e-16	236	259	3.01	0	13	17	14740000	2	658.848	1316.69	0	1.28	26.88	8103	8103	MS2	0/0	0	0	hela_waters_3.raw
High	A	2	APEQEQAAPGPAAGGEAPK	4156	Unambiguous	Brain acid soluble protein 1 OS=Homo sapiens OX=9606 GN=BASP1 PE=1 SV=2 - [BASP1_HUMAN]	1	1	P80723		HCD	1	0	1	1	0	1.62e-10	179	154	2.98	0	15	54	8063000	2	888.43	1775.85	0	-1.84	26.88	8104	8104	MS2	0/0	0	0	hela_waters_3.raw
High	A	2	VIGSGcNLDSAR	4978	Unambiguous	L-lactate dehydrogenase B chain OS=Homo sapiens OX=9606 GN=LDHB PE=1 SV=2 - [LDHB_HUMAN]|L-lactate dehydrogenase A chain OS=Homo sapiens OX=9606 GN=LDHA PE=1 SV=2 - [LDHA_HUMAN]	4	2	P07195;P00338	C6(Carbamidomethyl)	HCD	1	0	1	1	0	1.9e-12	162	137	2.49	0	22	45	10880000	2	624.805	1248.6	0	2.52	26.89	8106	8106	MS2	0/0	0	0	hela_waters_3.raw
High	A	2	DVDEAYMNK	4991	Unambiguous	Keratin, type II cytoskeletal 8 OS=Homo sapiens OX=9606 GN=KRT8 PE=1 SV=7 - [K2C8_HUMAN]	1	1	P05787		HCD	1	0	1	1	0	0.00411	54	49	1.42	0	57	15	14520000	2	542.735	1084.46	0	0.9	26.9	8113	8113	MS2	0/0	0	0	hela_waters_3.raw
High	A	2	HELQANcYEEVK	4510	Unambiguous	Cofilin-1 OS=Homo sapiens OX=9606 GN=CFL1 PE=1 SV=3 - [COF1_HUMAN]	1	1	P23528	C7(Carbamidomethyl)	HCD	1	0	1	1	0	4.21e-16	71	61	3.52	0	19	31	23250000	2	760.347	1519.69	0	0.8	26.91	8115	8115	MS2	0/0	0	0	hela_waters_3.raw
High	A	2	VDNDENEHQLSLR	4995	Unambiguous	Nucleophosmin OS=Homo sapiens OX=9606 GN=NPM1 PE=1 SV=2 - [NPM_HUMAN]	1	1	P06748		HCD	1	0	1	1	0	4.21e-16	159	129	3.76	0	10	43	17280000	2	784.871	1568.73	0	2.43	26.91	8116	8116	MS2	0/0	0	0	hela_waters_3.raw
High	A	2	TIDDLEEK	5002	Unambiguous	Tropomyosin alpha-4 chain OS=Homo sapiens OX=9606 GN=TPM4 PE=1 SV=3 - [TPM4_HUMAN]	1	1	P67936		HCD	1	0	1	1	0	0.000676	163	133	1.79	0	35	6	28300000	2	481.738	962.469	0	1.11	26.91	8119	8119	MS2	0/0	0	0	hela_waters_3.raw
High	A	2	GAVAEDGDELRTEPEAK	5004	Unambiguous	DNA-(apurinic or apyrimidinic site) lyase OS=Homo sapiens OX=9606 GN=APEX1 PE=1 SV=2 - [APEX1_HUMAN]	1	1	P27695		HCD	1	0	1	1	0	8.18e-07	160	126	2.86	1	9	58	4009000	2	893.927	1786.85	0	0.77	26.91	8120	8120	MS2	0/0	0	0	hela_waters_3.raw
High	A	2	EHDPVGQMVNNPK	5008	Unambiguous	Exportin-2 OS=Homo sapiens OX=9606 GN=CSE1L PE=1 SV=3 - [XPO2_HUMAN]	1	1	P55060		HCD	1	0	1	1	0	3.95e-12	115	134	2.6	0	8	36	14590000	2	732.849	1464.69	0	-0.05	26.91	8122	8122	MS2	0/0	0	0	hela_waters_3.raw
High	A	2	TATPEIVDNK	5010	Unambiguous	Filamin-B OS=Homo sapiens OX=9606 GN=FLNB PE=1 SV=2 - [FLNB_HUMAN]	1	1	O75369		HCD	1	0	1	1	0	0.000405	168	169	1.57	0	57	5	16090000	2	544.285	1087.56	0	-1.01	26.92	8124	8124	MS2	0/0	0	0	hela_waters_3.raw
High	A	2	ERHPGSFDVVHVK	4967	Unambiguous	40S ribosomal protein S4, X isoform OS=Homo sapiens OX=9606 GN=RPS4X PE=1 SV=2 - [RS4X_HUMAN]	2	1	P62701		HCD	1	0	1	1	0.002	0.0159	189	194	1.99	1	33	14	18110000	4	377.451	1506.78	0	1.07	26.92	8127	8127	MS2	0/0	0	0	hela_waters_3.raw
High	A	2	VDNSSLTGESEPQTR	4520	Unambiguous	Sodium/potassium-transporting ATPase subunit alpha-1 OS=Homo sapiens OX=9606 GN=ATP1A1 PE=1 SV=1 - [AT1A1_HUMAN]	4	1	P05023		HCD	1	0	1	1	0.001	0.0129	109	117	1.49	0	0	58	689600	2	810.38	1619.75	0	0.82	26.94	8133	8133	MS2	0/0	0	0	hela_waters_3.raw
High	A	2	VAVEEVDEEGK	5033	Unambiguous	Prelamin-A/C OS=Homo sapiens OX=9606 GN=LMNA PE=1 SV=1 - [LMNA_HUMAN]	1	1	P02545		HCD	1	0	1	1	0	4.17e-07	98	104	1.71	0	21	5	21970000	2	602.288	1203.57	0	-3.74	26.94	8135	8135	MS2	0/0	0	0	hela_waters_3.raw
Middle	A	2	AFDQLR	5035	Unambiguous	Transketolase OS=Homo sapiens OX=9606 GN=TKT PE=1 SV=3 - [TKT_HUMAN]	2	1	P29401		HCD	1	0	1	1	0.014	0.206	179	193	1.34	0	52	20	7361000	2	375.201	749.395	0	1.7	26.94	8136	8136	MS2	0/0	0	0	hela_waters_3.raw
Middle	A	2	AFDQIR	5035	Unambiguous	Transketolase OS=Homo sapiens OX=9606 GN=TKT PE=1 SV=3 - [TKT_HUMAN]	2	1	P29401		HCD	1	0	1	2	0.014	0.206	179	193	1.34	0	52	20	7361000	2	375.201	749.395	0	1.7	26.94	8136	8136	MS2	0/0	0	0	hela_waters_3.raw
High	A	2	LMSNLDSNR	5042	Unambiguous	Protein S100-A4 OS=Homo sapiens OX=9606 GN=S100A4 PE=1 SV=1 - [S10A4_HUMAN]	1	1	P26447		HCD	1	0	1	1	0	1.61e-08	161	166	1.87	0	10	1	151600000	2	525.255	1049.5	0	-1.19	26.95	8140	8140	MS2	0/0	0	0	hela_waters_3.raw
High	A	2	VDNDENEHQLSLR	4995	Unambiguous	Nucleophosmin OS=Homo sapiens OX=9606 GN=NPM1 PE=1 SV=2 - [NPM_HUMAN]	1	1	P06748		HCD	1	0	1	1	0	4.21e-16	145	113	2.81	0	15	1	209100000	3	523.582	1568.73	0	1.33	26.96	8143	8143	MS2	0/0	0	0	hela_waters_3.raw
High	A	2	DSYVGDEAQSK	2761	Unambiguous	Actin, alpha cardiac muscle 1 OS=Homo sapiens OX=9606 GN=ACTC1 PE=1 SV=1 - [ACTC_HUMAN]|Actin, cytoplasmic 1 OS=Homo sapiens OX=9606 GN=ACTB PE=1 SV=1 - [ACTB_HUMAN]	6	2	P68032;P60709		HCD	1	0	1	1	0	0.00102	57	54	1.67	0	61	44	9714000	2	599.765	1198.52	0	-0.22	26.96	8144	8144	MS2	0/0	0	0	hela_waters_3.raw
High	A	2	NHEEEMNALR	1837	Unambiguous	Keratin, type I cytoskeletal 17 OS=Homo sapiens OX=9606 GN=KRT17 PE=1 SV=2 - [K1C17_HUMAN]	2	1	Q04695		HCD	1	0	1	1	0.001	0.00584	54	45	1.82	0	49	12	20390000	2	621.781	1242.55	0	0.53	26.96	8146	8146	MS2	0/0	0	0	hela_waters_3.raw
High	A	2	VAIEPGAPR	5054	Unambiguous	Sorbitol dehydrogenase OS=Homo sapiens OX=9606 GN=SORD PE=1 SV=4 - [DHSO_HUMAN]	1	1	Q00796		HCD	1	0	1	1	0	5.26e-05	80	85	1.9	0	16	14	18140000	2	455.262	909.517	0	1.41	26.96	8147	8147	MS2	0/0	0	0	hela_waters_3.raw
High	A	2	TNYNDRYDEIR	4560	Unambiguous	60S ribosomal protein L7a OS=Homo sapiens OX=9606 GN=RPL7A PE=1 SV=2 - [RL7A_HUMAN]	1	1	P62424		HCD	1	0	1	1	0.008	0.0957	91	78	1.63	1	50	50	2217000	2	729.833	1458.66	0	-1.1	26.97	8150	8150	MS2	0/0	0	0	hela_waters_3.raw
High	A	2	SNYNLPMHK	5064	Unambiguous	60S ribosomal protein L4 OS=Homo sapiens OX=9606 GN=RPL4 PE=1 SV=5 - [RL4_HUMAN]	1	1	P36578		HCD	1	0	1	1	0.003	0.033	147	149	1.18	0	75	14	8164000	2	552.27	1103.53	0	2.7	26.97	8153	8153	MS2	0/0	0	0	hela_waters_3.raw
Middle	A	2	EIFDSR	5070	Unambiguous	Alpha-enolase OS=Homo sapiens OX=9606 GN=ENO1 PE=1 SV=2 - [ENOA_HUMAN]	1	1	P06733		HCD	1	0	1	1	0.013	0.2	99	125	1.44	0	29	6	26590000	2	383.691	766.374	0	1.2	26.99	8158	8158	MS2	0/0	0	0	hela_waters_3.raw
Middle	A	2	MPSGEFAR	5072	Unambiguous	Proliferating cell nuclear antigen OS=Homo sapiens OX=9606 GN=PCNA PE=1 SV=1 - [PCNA_HUMAN]	1	1	P12004		HCD	1	0	1	1	0.012	0.178	103	83	1.34	0	55	9	9226000	2	447.709	894.411	0	-2.74	26.99	8159	8159	MS2	0/0	0	0	hela_waters_3.raw
High	A	2	AVANYDSVEEGEK	5076	Unambiguous	Peroxisomal multifunctional enzyme type 2 OS=Homo sapiens OX=9606 GN=HSD17B4 PE=1 SV=3 - [DHB4_HUMAN]	1	1	P51659		HCD	1	0	1	1	0	5.97e-08	85	80	2.11	0	35	43	6114000	2	705.822	1410.64	0	-0.63	27	8162	8162	MS2	0/0	0	0	hela_waters_3.raw
Middle	A	2	SNYNLPMHK	5064	Unambiguous	60S ribosomal protein L4 OS=Homo sapiens OX=9606 GN=RPL4 PE=1 SV=5 - [RL4_HUMAN]	1	1	P36578		HCD	1	0	1	1	0.02	0.272	126	128	1.7	0	14	60	5288000	3	368.515	1103.53	0	-0.3	27	8163	8163	MS2	0/0	0	0	hela_waters_3.raw
High	A	2	ADLDVSGPK	4590	Unambiguous	Neuroblast differentiation-associated protein AHNAK OS=Homo sapiens OX=9606 GN=AHNAK PE=1 SV=2 - [AHNK_HUMAN]	1	1	Q09666		HCD	1	0	1	1	0	2.68e-07	153	182	2.18	0	48	4	21240000	2	451.237	901.466	0	3.5	27.01	8165	8165	MS2	0/0	0	0	hela_waters_3.raw
High	A	2	ADIDVSGPK	4590	Unambiguous	Neuroblast differentiation-associated protein AHNAK OS=Homo sapiens OX=9606 GN=AHNAK PE=1 SV=2 - [AHNK_HUMAN]	1	1	Q09666		HCD	1	0	1	2	0	2.68e-07	153	182	2.18	0	48	4	21240000	2	451.237	901.466	0	3.5	27.01	8165	8165	MS2	0/0	0	0	hela_waters_3.raw
High	A	2	ASIHEAWTDGK	5083	Unambiguous	Alpha-actinin-1 OS=Homo sapiens OX=9606 GN=ACTN1 PE=1 SV=2 - [ACTN1_HUMAN]|Alpha-actinin-4 OS=Homo sapiens OX=9606 GN=ACTN4 PE=1 SV=2 - [ACTN4_HUMAN]	2	2	P12814;O43707		HCD	1	0	1	1	0	0.000315	90	105	1.51	0	62	10	9835000	3	405.532	1214.58	0	0.63	27.01	8166	8166	MS2	0/0	0	0	hela_waters_3.raw
Middle	A	2	MDSTEPPYSQK	3772	Unambiguous	Elongation factor 1-alpha 1 OS=Homo sapiens OX=9606 GN=EEF1A1 PE=1 SV=1 - [EF1A1_HUMAN]	2	1	P68104		HCD	1	0	1	1	0.016	0.231	58	49	1.39	0	35	50	5798000	2	641.783	1282.56	0	-1.98	27.01	8167	8167	MS2	0/0	0	0	hela_waters_3.raw
High	A	2	HQGVMVGMGQK	2468	Unambiguous	Actin, alpha cardiac muscle 1 OS=Homo sapiens OX=9606 GN=ACTC1 PE=1 SV=1 - [ACTC_HUMAN]|Beta-actin-like protein 2 OS=Homo sapiens OX=9606 GN=ACTBL2 PE=1 SV=2 - [ACTBL_HUMAN]|Actin, cytoplasmic 1 OS=Homo sapiens OX=9606 GN=ACTB PE=1 SV=1 - [ACTB_HUMAN]	7	3	P68032;Q562R1;P60709		HCD	1	0	1	1	0	4.63e-06	125	123	2.12	0	23	5	42250000	2	586.289	1171.57	0	-0.97	27.02	8169	8169	MS2	0/0	0	0	hela_waters_3.raw
High	A	2	GTQGAEEVLR	5089	Unambiguous	Plectin OS=Homo sapiens OX=9606 GN=PLEC PE=1 SV=3 - [PLEC_HUMAN]	1	1	Q15149		HCD	1	0	1	1	0.001	0.00998	226	239	1.54	0	34	4	36050000	2	530.28	1059.55	0.01	9.95	27.02	8170	8170	MS2	0/0	0	0	hela_waters_3.raw
High	A	2	ELTAVVQK	5091	Unambiguous	40S ribosomal protein S3 OS=Homo sapiens OX=9606 GN=RPS3 PE=1 SV=2 - [RS3_HUMAN]	1	1	P23396		HCD	1	0	1	1	0	0.00437	193	190	1.76	0	66	4	22750000	2	444.264	887.52	0	0.69	27.02	8171	8171	MS2	0/0	0	0	hela_waters_3.raw
High	A	2	HVGDLGNVTADK	4601	Unambiguous	Superoxide dismutase [Cu-Zn] OS=Homo sapiens OX=9606 GN=SOD1 PE=1 SV=2 - [SODC_HUMAN]	1	1	P00441		HCD	1	0	1	1	0	2.14e-07	162	166	2.24	0	42	14	17720000	2	613.313	1225.62	0	0.82	27.02	8172	8172	MS2	0/0	0	0	hela_waters_3.raw
High	A	2	NFSDNQLQEGK	5097	Unambiguous	Transgelin-2 OS=Homo sapiens OX=9606 GN=TAGLN2 PE=1 SV=3 - [TAGL2_HUMAN]	1	1	P37802		HCD	1	0	1	1	0	0.00195	95	97	1.72	0	44	51	9137000	2	640.299	1279.59	0	-0.01	27.03	8175	8175	MS2	0/0	0	0	hela_waters_3.raw
High	A	2	QTYSTEPNNLK	4121	Unambiguous	60S ribosomal protein L28 OS=Homo sapiens OX=9606 GN=RPL28 PE=1 SV=3 - [RL28_HUMAN]	1	1	P46779		HCD	1	0	1	1	0	5.45e-05	166	171	1.62	0	28	50	6335000	2	647.818	1294.63	0	0.73	27.03	8176	8176	MS2	0/0	0	0	hela_waters_3.raw
High	A	2	IDELEPR	5101	Unambiguous	Neutral alpha-glucosidase AB OS=Homo sapiens OX=9606 GN=GANAB PE=1 SV=3 - [GANAB_HUMAN]	1	1	Q14697		HCD	1	0	1	1	0.001	0.00918	86	90	1.92	0	52	14	14100000	2	436.23	871.453	0	0.83	27.03	8177	8177	MS2	0/0	0	0	hela_waters_3.raw
High	A	2	GAVAEDGDELRTEPEAK	5004	Unambiguous	DNA-(apurinic or apyrimidinic site) lyase OS=Homo sapiens OX=9606 GN=APEX1 PE=1 SV=2 - [APEX1_HUMAN]	1	1	P27695		HCD	1	0	1	1	0.003	0.0318	154	120	3.54	1	20	47	10510000	3	596.287	1786.85	0	0.01	27.03	8178	8178	MS2	0/0	0	0	hela_waters_3.raw
High	A	2	QLQQAQAAGAEQEVEK	5105	Unambiguous	Flap endonuclease 1 OS=Homo sapiens OX=9606 GN=FEN1 PE=1 SV=1 - [FEN1_HUMAN]	1	1	P39748		HCD	1	0	1	1	0	4.21e-16	181	180	3.54	0	0	48	8877000	2	864.429	1727.85	0	-3.5	27.03	8179	8179	MS2	0/0	0	0	hela_waters_3.raw
High	A	2	NIIHGSDSVESAEK	4129	Unambiguous	Nucleoside diphosphate kinase A OS=Homo sapiens OX=9606 GN=NME1 PE=1 SV=1 - [NDKA_HUMAN]	1	1	P15531		HCD	1	0	1	1	0	1.46e-10	137	146	2.18	0	15	46	8716000	2	743.364	1485.72	0	1.49	27.04	8182	8182	MS2	0/0	0	0	hela_waters_3.raw
High	A	2	LEAALGEAK	5111	Unambiguous	Prelamin-A/C OS=Homo sapiens OX=9606 GN=LMNA PE=1 SV=1 - [LMNA_HUMAN]	1	1	P02545		HCD	1	0	1	1	0	1.98e-06	150	147	1.73	0	60	4	17730000	2	451.254	901.501	0	1.79	27.04	8183	8183	MS2	0/0	0	0	hela_waters_3.raw
High	A	2	LYEQLSGK	5113	Unambiguous	Phosphatidylethanolamine-binding protein 1 OS=Homo sapiens OX=9606 GN=PEBP1 PE=1 SV=3 - [PEBP1_HUMAN]	1	1	P30086		HCD	1	0	1	1	0.001	0.00658	136	130	1.17	0	60	7	16420000	2	469.254	937.501	0	1.76	27.04	8184	8184	MS2	0/0	0	0	hela_waters_3.raw
High	A	2	GFGGITHGPPEK	5115	Unambiguous	Very long-chain specific acyl-CoA dehydrogenase, mitochondrial OS=Homo sapiens OX=9606 GN=ACADVL PE=1 SV=1 - [ACADV_HUMAN]	1	1	P49748		HCD	1	0	1	1	0	1.78e-07	181	181	2.54	0	45	51	8823000	2	598.807	1196.61	0	0.08	27.04	8185	8185	MS2	0/0	0	0	hela_waters_3.raw
Middle	A	2	DQEFTVK	5117	Unambiguous	Filamin-A OS=Homo sapiens OX=9606 GN=FLNA PE=1 SV=4 - [FLNA_HUMAN]	1	1	P21333		HCD	1	0	1	1	0.039	0.526	132	146	1.64	0	40	12	8208000	2	433.717	866.426	0	0.71	27.05	8186	8186	MS2	0/0	0	0	hela_waters_3.raw
High	A	2	LNFSHGTHEYHAETIK	4613	Unambiguous	Pyruvate kinase PKM OS=Homo sapiens OX=9606 GN=PKM PE=1 SV=4 - [KPYM_HUMAN]	1	1	P14618		HCD	1	0	1	1	0	8.83e-12	168	188	2.96	0	2	41	13350000	3	628.639	1883.9	0	0.07	27.06	8192	8192	MS2	0/0	0	0	hela_waters_3.raw
High	A	2	ALANSLAcQGK	5131	Unambiguous	Fructose-bisphosphate aldolase A OS=Homo sapiens OX=9606 GN=ALDOA PE=1 SV=2 - [ALDOA_HUMAN]	1	1	P04075	C8(Carbamidomethyl)	HCD	1	0	1	1	0	1e-11	216	230	2.32	0	11	1	144600000	2	566.793	1132.58	0	1.14	27.06	8194	8194	MS2	0/0	0	0	hela_waters_3.raw
High	A	2	SNVSDAVAQSTR	4662	Unambiguous	Triosephosphate isomerase OS=Homo sapiens OX=9606 GN=TPI1 PE=1 SV=3 - [TPIS_HUMAN]	1	1	P60174		HCD	1	0	1	1	0	3.83e-11	171	178	2.58	0	46	8	25750000	2	617.804	1234.6	0	-2.02	27.07	8197	8197	MS2	0/0	0	0	hela_waters_3.raw
High	A	2	DVEDESTGLEK	5137	Unambiguous	Serpin B5 OS=Homo sapiens OX=9606 GN=SERPINB5 PE=1 SV=2 - [SPB5_HUMAN]	1	1	P36952		HCD	1	0	1	1	0	1.1e-09	84	72	1.69	0	47	9	20960000	2	611.279	1221.55	0	1.97	27.07	8198	8198	MS2	0/0	0	0	hela_waters_3.raw
High	A	2	EDMAALEK	5139	Unambiguous	Tubulin alpha-1A chain OS=Homo sapiens OX=9606 GN=TUBA1A PE=1 SV=1 - [TBA1A_HUMAN]|Tubulin alpha-1B chain OS=Homo sapiens OX=9606 GN=TUBA1B PE=1 SV=1 - [TBA1B_HUMAN]|Tubulin alpha-1C chain OS=Homo sapiens OX=9606 GN=TUBA1C PE=1 SV=1 - [TBA1C_HUMAN]|Tubulin alpha-4A chain OS=Homo sapiens OX=9606 GN=TUBA4A PE=1 SV=1 - [TBA4A_HUMAN]	4	2	Q9BQE3;P68366		HCD	1	0	1	1	0.002	0.0134	89	92	1.57	0	50	6	19920000	2	453.716	906.425	0	1.53	27.07	8199	8199	MS2	0/0	0	0	hela_waters_3.raw
High	A	2	EKPTTALLDK	5143	Unambiguous	Interleukin enhancer-binding factor 3 OS=Homo sapiens OX=9606 GN=ILF3 PE=1 SV=3 - [ILF3_HUMAN]	1	1	Q12906		HCD	1	0	1	1	0	1.87e-07	161	166	1.94	0	49	8	17260000	2	558.319	1115.63	0	-0.16	27.08	8201	8201	MS2	0/0	0	0	hela_waters_3.raw
High	A	2	GVEEEEEDGEMRE	4625	Unambiguous	Small nuclear ribonucleoprotein F OS=Homo sapiens OX=9606 GN=SNRPF PE=1 SV=1 - [RUXF_HUMAN]	1	1	P62306		HCD	1	0	1	1	0.002	0.014	6	5	1.44	1	52	56	3453000	2	769.3	1537.59	0	-1.49	27.08	8202	8202	MS2	0/0	0	0	hela_waters_3.raw
High	A	2	FGQGGAGPVGGQGPR	4909	Unambiguous	Splicing factor, proline- and glutamine-rich OS=Homo sapiens OX=9606 GN=SFPQ PE=1 SV=2 - [SFPQ_HUMAN]	1	1	P23246		HCD	1	0	1	1	0	4.21e-16	161	175	3.22	0	55	43	10610000	2	671.335	1341.66	0	-2.07	27.09	8204	8204	MS2	0/0	0	0	hela_waters_3.raw
High	A	2	EASDPQPEEADGGLK	4641	Unambiguous	F-actin-capping protein subunit alpha-1 OS=Homo sapiens OX=9606 GN=CAPZA1 PE=1 SV=3 - [CAZA1_HUMAN]	1	1	P52907		HCD	1	0	1	1	0.002	0.0163	69	73	1.12	0	42	59	2858000	2	771.849	1542.69	0	-0.61	27.09	8206	8206	MS2	0/0	0	0	hela_waters_3.raw
High	A	2	QIPQATASMK	5157	Unambiguous	D-3-phosphoglycerate dehydrogenase OS=Homo sapiens OX=9606 GN=PHGDH PE=1 SV=4 - [SERA_HUMAN]	1	1	O43175		HCD	1	0	1	1	0	4.21e-05	236	263	1.73	0	49	4	24610000	2	537.784	1074.56	0	0.17	27.1	8210	8210	MS2	0/0	0	0	hela_waters_3.raw
High	A	2	QAASSLQQASLK	5159	Unambiguous	Stress-70 protein, mitochondrial OS=Homo sapiens OX=9606 GN=HSPA9 PE=1 SV=2 - [GRP75_HUMAN]	1	1	P38646		HCD	1	0	1	1	0	2.54e-14	211	211	2.53	0	31	6	30720000	2	616.337	1231.67	0	1.46	27.1	8211	8211	MS2	0/0	0	0	hela_waters_3.raw
High	A	2	DGMDNQGGYGSVGR	5166	Unambiguous	Heterogeneous nuclear ribonucleoprotein H3 OS=Homo sapiens OX=9606 GN=HNRNPH3 PE=1 SV=2 - [HNRH3_HUMAN]	1	1	P31942		HCD	1	0	1	1	0	4.21e-16	24	21	2.51	0	57	47	8376000	2	706.798	1412.59	0	1.72	27.1	8214	8214	MS2	0/0	0	0	hela_waters_3.raw
High	A	2	DGEEAGAYDGPR	3975	Unambiguous	Protein disulfide-isomerase A3 OS=Homo sapiens OX=9606 GN=PDIA3 PE=1 SV=4 - [PDIA3_HUMAN]	1	1	P30101		HCD	1	0	1	1	0.002	0.0135	27	18	1.52	0	85	13	5245000	2	618.761	1236.51	0	1.24	27.11	8216	8216	MS2	0/0	0	0	hela_waters_3.raw
High	A	2	SSGSPYGGGYGSGGGSGGYGSR	4697	Unambiguous	Heterogeneous nuclear ribonucleoprotein A3 OS=Homo sapiens OX=9606 GN=HNRNPA3 PE=1 SV=2 - [ROA3_HUMAN]	1	1	P51991		HCD	1	0	1	1	0	4.21e-16	25	29	3.11	0	0	60	1666000	2	955.898	1910.79	0	-1.06	27.12	8221	8221	MS2	0/0	0	0	hela_waters_3.raw
High	A	2	LNFSHGTHEYHAETIK	4613	Unambiguous	Pyruvate kinase PKM OS=Homo sapiens OX=9606 GN=PKM PE=1 SV=4 - [KPYM_HUMAN]	1	1	P14618		HCD	1	0	1	1	0.001	0.00737	162	178	1.42	0	0	60	3423000	2	942.456	1883.91	0	0.95	27.12	8223	8223	MS2	0/0	0	0	hela_waters_3.raw
High	A	2	HEQNIDcGGGYVK	3581	Unambiguous	Calreticulin OS=Homo sapiens OX=9606 GN=CALR PE=1 SV=1 - [CALR_HUMAN]	1	1	P27797	C7(Carbamidomethyl)	HCD	1	0	1	1	0	1.36e-06	62	63	2.35	0	26	47	7947000	2	738.831	1476.65	0	0.3	27.12	8225	8225	MS2	0/0	0	0	hela_waters_3.raw
High	A	2	AAVGQESPGGLEAGNAK	5193	Unambiguous	Sister chromatid cohesion protein PDS5 homolog A OS=Homo sapiens OX=9606 GN=PDS5A PE=1 SV=1 - [PDS5A_HUMAN]	1	1	Q29RF7		HCD	1	0	1	1	0	8.92e-05	169	166	1.54	0	48	60	2844000	2	778.388	1555.77	0	-1.1	27.13	8228	8228	MS2	0/0	0	0	hela_waters_3.raw
High	A	2	YKPESEELTAER	4232	Unambiguous	Protein disulfide-isomerase OS=Homo sapiens OX=9606 GN=P4HB PE=1 SV=3 - [PDIA1_HUMAN]	1	1	P07237		HCD	1	0	1	1	0	6.35e-06	180	157	1.86	0	28	51	5398000	2	726.354	1451.7	0	0.18	27.13	8230	8230	MS2	0/0	0	0	hela_waters_3.raw
High	A	2	cYEMASHLR	4703	Unambiguous	Profilin-1 OS=Homo sapiens OX=9606 GN=PFN1 PE=1 SV=2 - [PROF1_HUMAN]	1	1	P07737	C1(Carbamidomethyl)	HCD	1	0	1	1	0	7.93e-11	67	60	2.5	0	29	39	14110000	2	583.758	1166.51	0	-0.05	27.14	8231	8231	MS2	0/0	0	0	hela_waters_3.raw
High	A	2	EVATNSELVQSGK	4723	Unambiguous	Keratin, type I cytoskeletal 17 OS=Homo sapiens OX=9606 GN=KRT17 PE=1 SV=2 - [K1C17_HUMAN]	2	1	Q04695		HCD	1	0	1	1	0	4.21e-16	218	208	2.6	0	6	7	55620000	2	681.349	1361.69	0	0.42	27.14	8233	8233	MS2	0/0	0	0	hela_waters_3.raw
High	A	2	HTGPNSPDTANDGFVR	4725	Unambiguous	Heterogeneous nuclear ribonucleoprotein H2 OS=Homo sapiens OX=9606 GN=HNRNPH2 PE=1 SV=1 - [HNRH2_HUMAN]|Heterogeneous nuclear ribonucleoprotein H OS=Homo sapiens OX=9606 GN=HNRNPH1 PE=1 SV=4 - [HNRH1_HUMAN]	2	2	P55795;P31943		HCD	1	0	1	1	0	1.35e-11	103	106	3.2	0	12	22	7788000	3	562.261	1684.77	0	1.1	27.14	8234	8234	MS2	0/0	0	0	hela_waters_3.raw
High	A	2	LITEDVQGK	5203	Unambiguous	40S ribosomal protein S3a OS=Homo sapiens OX=9606 GN=RPS3A PE=1 SV=2 - [RS3A_HUMAN]	1	1	P61247		HCD	1	0	1	1	0.001	0.00669	249	224	1.29	0	58	6	13090000	2	501.777	1002.55	0	-0.28	27.15	8236	8236	MS2	0/0	0	0	hela_waters_3.raw
High	A	2	GVDLQENNPASR	5205	Unambiguous	Ras-related protein Rab-5C OS=Homo sapiens OX=9606 GN=RAB5C PE=1 SV=2 - [RAB5C_HUMAN]	1	1	P51148		HCD	1	0	1	1	0	4.21e-16	129	132	2.93	0	9	51	8964000	2	650.317	1299.63	0	-0.84	27.15	8237	8237	MS2	0/0	0	0	hela_waters_3.raw
High	A	2	TPGPGAQSALR	4013	Unambiguous	40S ribosomal protein S14 OS=Homo sapiens OX=9606 GN=RPS14 PE=1 SV=3 - [RS14_HUMAN]	1	1	P62263		HCD	1	0	1	1	0	4.74e-08	160	161	2.27	0	46	8	12950000	2	527.786	1054.57	0	1.13	27.16	8239	8239	MS2	0/0	0	0	hela_waters_3.raw
Middle	A	2	EGDTMMGQQVAK	5211	Unambiguous	Prostaglandin reductase 1 OS=Homo sapiens OX=9606 GN=PTGR1 PE=1 SV=2 - [PTGR1_HUMAN]	1	1	Q14914		HCD	1	0	1	1	0.03	0.395	88	92	0.97	0	59	53	5847000	2	647.796	1294.58	0	5.87	27.16	8241	8241	MS2	0/0	0	0	hela_waters_3.raw
High	A	2	EKPTTALLDK	5143	Unambiguous	Interleukin enhancer-binding factor 3 OS=Homo sapiens OX=9606 GN=ILF3 PE=1 SV=3 - [ILF3_HUMAN]	1	1	Q12906		HCD	1	0	1	1	0.005	0.0636	220	221	1.59	0	55	56	4486000	3	372.549	1115.63	0	1.66	27.16	8242	8242	MS2	0/0	0	0	hela_waters_3.raw
High	A	2	EEEEPMDTSSVTHTEHYK	5217	Unambiguous	Heterogeneous nuclear ribonucleoprotein R OS=Homo sapiens OX=9606 GN=HNRNPR PE=1 SV=1 - [HNRPR_HUMAN]	1	1	O43390		HCD	1	0	1	1	0	4.21e-16	20	25	3.36	0	23	48	6445000	3	716.972	2148.9	0	0.08	27.16	8244	8244	MS2	0/0	0	0	hela_waters_3.raw
High	A	2	VVLIGGKPDR	5223	Unambiguous	Heterogeneous nuclear ribonucleoprotein K OS=Homo sapiens OX=9606 GN=HNRNPK PE=1 SV=1 - [HNRPK_HUMAN]	1	1	P61978		HCD	1	0	1	1	0	4.57e-10	54	42	2.39	0	86	60	346700	3	351.886	1053.64	0	2	27.18	8249	8249	MS2	0/0	0	0	hela_waters_3.raw
Middle	A	2	NEEPSEEEIDAPKPK	4684	Unambiguous	Nucleolar RNA helicase 2 OS=Homo sapiens OX=9606 GN=DDX21 PE=1 SV=5 - [DDX21_HUMAN]	1	1	Q9NR30		HCD	1	0	1	1	0.014	0.201	127	141	1.16	0		60	0	2	856.406	1711.8	0	1.2	27.18	8251	8251	MS2	0/0	0	0	hela_waters_3.raw
High	A	2	AQAAAPASVPAQAPK	4778	Unambiguous	60S ribosomal protein L29 OS=Homo sapiens OX=9606 GN=RPL29 PE=1 SV=2 - [RL29_HUMAN]	1	1	P47914		HCD	1	0	1	1	0	2.01e-07	196	223	2.24	0	16	11	25390000	2	689.379	1377.75	0	0.98	27.19	8253	8253	MS2	0/0	0	0	hela_waters_3.raw
High	A	2	NMMAAcDPR	4302	Unambiguous	Tubulin beta-2A chain OS=Homo sapiens OX=9606 GN=TUBB2A PE=1 SV=1 - [TBB2A_HUMAN]|Tubulin beta-3 chain OS=Homo sapiens OX=9606 GN=TUBB3 PE=1 SV=2 - [TBB3_HUMAN]|Tubulin beta-4A chain OS=Homo sapiens OX=9606 GN=TUBB4A PE=1 SV=2 - [TBB4A_HUMAN]|Tubulin beta-4B chain OS=Homo sapiens OX=9606 GN=TUBB4B PE=1 SV=1 - [TBB4B_HUMAN]|Tubulin beta chain OS=Homo sapiens OX=9606 GN=TUBB PE=1 SV=2 - [TBB5_HUMAN…	9	3	P68371;P07437;Q9BUF5	C6(Carbamidomethyl)	HCD	1	0	1	1	0.006	0.0661	14	13	1.72	0	36	12	24040000	2	533.218	1065.43	0	0.95	27.19	8254	8254	MS2	0/0	0	0	hela_waters_3.raw
High	A	2	YLAEVAcGDDRK	4480	Unambiguous	14-3-3 protein theta OS=Homo sapiens OX=9606 GN=YWHAQ PE=1 SV=1 - [1433T_HUMAN]	1	1	P27348	C7(Carbamidomethyl)	HCD	1	0	1	1	0	0.00108	131	137	2.27	1	47	51	6423000	2	698.831	1396.66	0	1.77	27.19	8256	8256	MS2	0/0	0	0	hela_waters_3.raw
High	A	2	EAPPMEKPEVVK	5240	Unambiguous	40S ribosomal protein S15 OS=Homo sapiens OX=9606 GN=RPS15 PE=1 SV=2 - [RS15_HUMAN]	1	1	P62841		HCD	1	0	1	1	0.001	0.00667	203	171	2.31	0	58	56	4709000	2	677.357	1353.71	0	-0.76	27.2	8258	8258	MS2	0/0	0	0	hela_waters_3.raw
High	A	2	FSELTAEK	5242	Unambiguous	T-complex protein 1 subunit epsilon OS=Homo sapiens OX=9606 GN=CCT5 PE=1 SV=1 - [TCPE_HUMAN]	1	1	P48643		HCD	1	0	1	1	0.001	0.00649	127	117	1.06	0	43	5	23160000	2	462.738	924.469	0	1.65	27.2	8260	8260	MS2	0/0	0	0	hela_waters_3.raw
High	A	2	GPPQEEEEEEDEEEEATK	4796	Unambiguous	Hepatoma-derived growth factor OS=Homo sapiens OX=9606 GN=HDGF PE=1 SV=1 - [HDGF_HUMAN]	1	1	P51858		HCD	1	0	1	1	0	1.36e-07		5	2.08	0	30	60	3415000	2	1052.42	2103.84	0	0.73	27.2	8261	8261	MS2	0/0	0	0	hela_waters_3.raw
High	A	2	AAPGAEFAPNK	5246	Unambiguous	Non-POU domain-containing octamer-binding protein OS=Homo sapiens OX=9606 GN=NONO PE=1 SV=4 - [NONO_HUMAN]	1	1	Q15233		HCD	1	0	1	1	0	1.26e-07	144	133	1.69	0	49	6	23170000	2	536.775	1072.54	0	0.26	27.21	8263	8263	MS2	0/0	0	0	hela_waters_3.raw
High	A	2	LVAGEMGQNEPDQGGQR	3416	Unambiguous	3-hydroxyacyl-CoA dehydrogenase type-2 OS=Homo sapiens OX=9606 GN=HSD17B10 PE=1 SV=3 - [HCD2_HUMAN]	1	1	Q99714		HCD	1	0	1	1	0	4.21e-16	104	112	3.09	0	3	38	14860000	2	893.414	1785.82	0	1.16	27.21	8264	8264	MS2	0/0	0	0	hela_waters_3.raw
High	A	2	IKDPDASKPEDWDER	5252	Unambiguous	Calreticulin OS=Homo sapiens OX=9606 GN=CALR PE=1 SV=1 - [CALR_HUMAN]	1	1	P27797		HCD	1	0	1	1	0	4.21e-16	140	145	2.72	1	14	6	48050000	3	600.952	1800.84	0	0.86	27.22	8266	8266	MS2	0/0	0	0	hela_waters_3.raw
High	A	2	IKDPDASKPEDWDER	5252	Unambiguous	Calreticulin OS=Homo sapiens OX=9606 GN=CALR PE=1 SV=1 - [CALR_HUMAN]	1	1	P27797		HCD	1	0	1	1	0	4.21e-16	139	146	2.98	1	40	37	18640000	2	900.924	1800.84	0	0.56	27.22	8267	8267	MS2	0/0	0	0	hela_waters_3.raw
High	A	2	SVTEQGAELSNEER	4818	Unambiguous	14-3-3 protein zeta/delta OS=Homo sapiens OX=9606 GN=YWHAZ PE=1 SV=1 - [1433Z_HUMAN]	1	1	P63104		HCD	1	0	1	1	0	4.21e-16	111	94	3.18	0	24	14	22540000	2	774.86	1548.71	0	-1.27	27.23	8271	8271	MS2	0/0	0	0	hela_waters_3.raw
High	A	2	AAEAAAAPAESAAPAAGEEPSK	4808	Unambiguous	Brain acid soluble protein 1 OS=Homo sapiens OX=9606 GN=BASP1 PE=1 SV=2 - [BASP1_HUMAN]	1	1	P80723		HCD	1	0	1	1	0	1.04e-14	130	139	3.12	0	0	57	8534000	2	983.972	1966.94	0	1.11	27.23	8272	8272	MS2	0/0	0	0	hela_waters_3.raw
High	A	2	FNAHGDANTIVcNSK	4824	Unambiguous	Galectin-1 OS=Homo sapiens OX=9606 GN=LGALS1 PE=1 SV=2 - [LEG1_HUMAN]	1	1	P09382	C12(Carbamidomethyl)	HCD	1	0	1	1	0	0.000463	108	105	2.14	0	18	48	5160000	2	824.383	1647.76	0	2.07	27.23	8273	8273	MS2	0/0	0	0	hela_waters_3.raw
High	A	2	VVLIGGKPDR	5223	Unambiguous	Heterogeneous nuclear ribonucleoprotein K OS=Homo sapiens OX=9606 GN=HNRNPK PE=1 SV=1 - [HNRPK_HUMAN]	1	1	P61978		HCD	1	0	1	1	0.001	0.00598	38	32	2.07	0	49	6	22080000	2	527.325	1053.64	0	0.54	27.23	8274	8274	MS2	0/0	0	0	hela_waters_3.raw
High	A	2	INISEGNcPER	4830	Unambiguous	Poly(rC)-binding protein 1 OS=Homo sapiens OX=9606 GN=PCBP1 PE=1 SV=2 - [PCBP1_HUMAN]|Poly(rC)-binding protein 2 OS=Homo sapiens OX=9606 GN=PCBP2 PE=1 SV=1 - [PCBP2_HUMAN]	3	2	Q15365;Q15366	C8(Carbamidomethyl)	HCD	1	0	1	1	0	4.84e-12	97	90	2.47	0	21	15	20200000	2	644.801	1288.59	0	-0.24	27.24	8277	8277	MS2	0/0	0	0	hela_waters_3.raw
High	A	2	IKDPDASKPEDWDER	5252	Unambiguous	Calreticulin OS=Homo sapiens OX=9606 GN=CALR PE=1 SV=1 - [CALR_HUMAN]	1	1	P27797		HCD	1	0	1	1	0.003	0.0336	144	145	1.3	1	43	4	24410000	4	450.966	1800.84	0	1.29	27.24	8278	8278	MS2	0/0	0	0	hela_waters_3.raw
High	A	2	EIAQDFK	4848	Unambiguous	Histone H3.1 OS=Homo sapiens OX=9606 GN=HIST1H3A PE=1 SV=2 - [H31_HUMAN]	4	1	P68431		HCD	1	0	1	1	0.007	0.086	134	162	1.32	0	6	2	82510000	2	425.719	850.431	0	0.98	27.25	8282	8282	MS2	0/0	0	0	hela_waters_3.raw
Middle	A	2	EVSTYIK	4840	Unambiguous	Elongation factor 1-alpha 1 OS=Homo sapiens OX=9606 GN=EEF1A1 PE=1 SV=1 - [EF1A1_HUMAN]	2	1	P68104		HCD	1	0	1	1	0.024	0.332	125	142	1.39	0	24	12	16470000	2	420.23	839.452	0	1.43	27.25	8283	8283	MS2	0/0	0	0	hela_waters_3.raw
High	A	2	DWHRPcLK	4369	Unambiguous	Cysteine-rich protein 1 OS=Homo sapiens OX=9606 GN=CRIP1 PE=1 SV=3 - [CRIP1_HUMAN]	1	1	P50238	C6(Carbamidomethyl)	HCD	1	0	1	1	0.002	0.0133	138	149	1.46	0	22	60	2779000	3	371.187	1111.55	0	-0.03	27.26	8288	8288	MS2	0/0	0	0	hela_waters_3.raw
High	A	2	YESLTDPSK	4506	Unambiguous	Heat shock protein HSP 90-beta OS=Homo sapiens OX=9606 GN=HSP90AB1 PE=1 SV=4 - [HS90B_HUMAN]|Heat shock protein HSP 90-alpha OS=Homo sapiens OX=9606 GN=HSP90AA1 PE=1 SV=5 - [HS90A_HUMAN]|Putative heat shock protein HSP 90-beta 4 OS=Homo sapiens OX=9606 GN=HSP90AB4P PE=5 SV=1 - [H90B4_HUMAN]	5	2	P08238;P07900		HCD	1	0	1	1	0.002	0.0172	106	104	1.31	0	38	9	15760000	2	520.253	1039.5	0	4.04	27.26	8289	8289	MS2	0/0	0	0	hela_waters_3.raw
High	A	2	EALLQASR	5290	Unambiguous	Moesin OS=Homo sapiens OX=9606 GN=MSN PE=1 SV=3 - [MOES_HUMAN]	1	1	P26038		HCD	1	0	1	1	0.007	0.0778	229	228	1.56	0	72	5	14380000	2	444.25	887.494	0	-1.17	27.26	8290	8290	MS2	0/0	0	0	hela_waters_3.raw
High	A	2	AIYQATYR	5294	Unambiguous	Proteasome subunit beta type-5 OS=Homo sapiens OX=9606 GN=PSMB5 PE=1 SV=3 - [PSB5_HUMAN]	1	1	P28074		HCD	1	0	1	1	0.001	0.00993	108	122	1.48	0	70	7	15750000	2	493.261	985.514	0	3.79	27.27	8293	8293	MS2	0/0	0	0	hela_waters_3.raw
High	A	2	QEYDESGPSIVHR	5305	Unambiguous	Actin, cytoplasmic 1 OS=Homo sapiens OX=9606 GN=ACTB PE=1 SV=1 - [ACTB_HUMAN]	7	1	P60709		HCD	1	0	1	1	0	8.26e-07	94	106	2.73	0	25	8	28970000	3	506.241	1516.71	0	3.11	27.28	8299	8299	MS2	0/0	0	0	hela_waters_3.raw
High	A	2	YRPGTVALR	4410	Unambiguous	Histone H3.1 OS=Homo sapiens OX=9606 GN=HIST1H3A PE=1 SV=2 - [H31_HUMAN]	5	1	P68431		HCD	1	0	1	1	0	2.97e-05	167	173	2.04	0	6	1	159900000	2	516.802	1032.6	0	0.91	27.3	8304	8304	MS2	0/0	0	0	hela_waters_3.raw
High	A	2	EFHLNESGDPSSK	5315	Unambiguous	Protein SET OS=Homo sapiens OX=9606 GN=SET PE=1 SV=3 - [SET_HUMAN]	2	1	Q01105		HCD	1	0	1	1	0.004	0.0542	88	85	1.42	0	36	5	41050000	3	482.889	1446.65	0	1.46	27.3	8305	8305	MS2	0/0	0	0	hela_waters_3.raw
High	A	2	GSGTAEVELK	4885	Unambiguous	Pyruvate kinase PKM OS=Homo sapiens OX=9606 GN=PKM PE=1 SV=4 - [KPYM_HUMAN]	1	1	P14618		HCD	1	0	1	1	0	9.47e-05	234	220	1.35	0	36	7	15430000	2	495.761	990.514	0	3.6	27.3	8307	8307	MS2	0/0	0	0	hela_waters_3.raw
High	A	2	ISSDLDGHPVPK	4895	Unambiguous	Transketolase OS=Homo sapiens OX=9606 GN=TKT PE=1 SV=3 - [TKT_HUMAN]	1	1	P29401		HCD	1	0	1	1	0.002	0.0194	223	211	1.43	0	48	53	6653000	2	632.83	1264.65	0	-0.49	27.31	8310	8310	MS2	0/0	0	0	hela_waters_3.raw
High	A	2	YADEEIPR	5327	Unambiguous	Filamin-B OS=Homo sapiens OX=9606 GN=FLNB PE=1 SV=2 - [FLNB_HUMAN]	1	1	O75369		HCD	1	0	1	1	0	0.000159	147	147	1.5	0	52	7	15160000	2	496.739	992.472	0	3.18	27.31	8312	8312	MS2	0/0	0	0	hela_waters_3.raw
High	A	2	SPPPGMGLNQNR	5331	Unambiguous	Splicing factor, proline- and glutamine-rich OS=Homo sapiens OX=9606 GN=SFPQ PE=1 SV=2 - [SFPQ_HUMAN]	1	1	P23246		HCD	1	0	1	1	0	2.06e-05	160	164	1.9	0	27	51	9645000	2	634.315	1267.62	0	1.26	27.32	8315	8315	MS2	0/0	0	0	hela_waters_3.raw
Middle	A	2	TVEALYK	5333	Unambiguous	Phosphate carrier protein, mitochondrial OS=Homo sapiens OX=9606 GN=SLC25A3 PE=1 SV=2 - [MPCP_HUMAN]	1	1	Q00325		HCD	1	0	1	1	0.015	0.221	78	75	1.35	0		24	0	2	412.233	823.458	0	2.83	27.32	8316	8316	MS2	0/0	0	0	hela_waters_3.raw
High	A	2	SLAPSIHGHDYVK	5337	Unambiguous	DNA replication licensing factor MCM3 OS=Homo sapiens OX=9606 GN=MCM3 PE=1 SV=3 - [MCM3_HUMAN]	1	1	P25205		HCD	1	0	1	1	0	9.55e-05	173	203	1.61	0	33	54	1909000	2	712.371	1423.73	0	1.17	27.32	8318	8318	MS2	0/0	0	0	hela_waters_3.raw
High	A	2	TQPMTAQAASYR	4903	Unambiguous	RNA-binding protein 14 OS=Homo sapiens OX=9606 GN=RBM14 PE=1 SV=2 - [RBM14_HUMAN]	1	1	Q96PK6		HCD	1	0	1	1	0	4.24e-07	148	140	2.06	0	65	59	3549000	2	662.817	1324.63	0	-3.74	27.32	8319	8319	MS2	0/0	0	0	hela_waters_3.raw
High	A	2	GGcPGGEATLSQPPPR	5345	Unambiguous	Transcription factor BTF3 OS=Homo sapiens OX=9606 GN=BTF3 PE=1 SV=1 - [BTF3_HUMAN]	1	1	P20290	C3(Carbamidomethyl)	HCD	1	0	1	1	0	1.67e-06	140	127	1.98	0	0	56	2315000	2	790.875	1580.74	0	-3.21	27.33	8323	8323	MS2	0/0	0	0	hela_waters_3.raw
Middle	A	2	VLVPATDR	5347	Unambiguous	Eukaryotic translation initiation factor 3 subunit E OS=Homo sapiens OX=9606 GN=EIF3E PE=1 SV=1 - [EIF3E_HUMAN]	1	1	P60228		HCD	1	0	1	1	0.038	0.506	65	58	1.67	0	60	10	10320000	2	435.757	870.507	0	2.65	27.34	8324	8324	MS2	0/0	0	0	hela_waters_3.raw
High	A	2	EAKPDELMDSK	4731	Unambiguous	Vesicle-associated membrane protein-associated protein A OS=Homo sapiens OX=9606 GN=VAPA PE=1 SV=3 - [VAPA_HUMAN]	1	1	Q9P0L0		HCD	1	0	1	1	0	1.75e-07	122	127	1.51	0	30	52	7312000	2	631.801	1262.59	0	1.11	27.34	8325	8325	MS2	0/0	0	0	hela_waters_3.raw
High	A	2	DTILSER	5357	Rejected	Protein KASH5 OS=Homo sapiens OX=9606 GN=CCDC155 PE=1 SV=2 - [KASH5_HUMAN]	1	0			HCD	0	0	1	1	0.007	0.0784	255	262	1.79	0	39	12	15990000	2	417.223	833.438	0	1.64	27.35	8330	8330	MS2	0/0	0	0	hela_waters_3.raw
High	A	2	SEISELR	5358	Selected	Keratin, type I cytoskeletal 17 OS=Homo sapiens OX=9606 GN=KRT17 PE=1 SV=2 - [K1C17_HUMAN]	2	1	Q04695		HCD		0	2	2	0.002	0.0177	255	262	1.79	0	39	12	15990000	2	417.223	833.438	0	1.64	27.35	8330	8330	MS2	0/0	0	0	hela_waters_3.raw
High	A	2	GQTHTLEDFQR	5366	Unambiguous	3-hydroxyacyl-CoA dehydrogenase type-2 OS=Homo sapiens OX=9606 GN=HSD17B10 PE=1 SV=3 - [HCD2_HUMAN]	1	1	Q99714		HCD	1	0	1	1	0	4.66e-10	121	130	2.52	0	15	39	14070000	2	666.32	1331.63	0	-0.42	27.35	8334	8334	MS2	0/0	0	0	hela_waters_3.raw
Middle	A	2	HINTWVAEK	5370	Unambiguous	Serpin B6 OS=Homo sapiens OX=9606 GN=SERPINB6 PE=1 SV=3 - [SPB6_HUMAN]	1	1	P35237		HCD	1	0	1	1	0.025	0.348	144	145	1.12	0	40	21	5784000	2	549.291	1097.57	0	0.59	27.35	8336	8336	MS2	0/0	0	0	hela_waters_3.raw
High	A	2	VLEDSDLK	4939	Unambiguous	Endoplasmic reticulum chaperone BiP OS=Homo sapiens OX=9606 GN=HSPA5 PE=1 SV=2 - [BIP_HUMAN]	1	1	P11021		HCD	1	0	1	1	0.001	0.00771	218	199	1.25	0	61	6	10470000	2	459.743	918.479	0	0.99	27.36	8339	8339	MS2	0/0	0	0	hela_waters_3.raw
High	A	2	LSSEMNTSTVNSAR	4943	Unambiguous	Lamin-B1 OS=Homo sapiens OX=9606 GN=LMNB1 PE=1 SV=2 - [LMNB1_HUMAN]	1	1	P20700		HCD	1	0	1	1	0	4.21e-16	124	119	2.23	0	77	48	3193000	2	748.853	1496.7	0	-2.14	27.37	8341	8341	MS2	0/0	0	0	hela_waters_3.raw
High	A	2	IIAPPER	4449	Unambiguous	Actin, alpha cardiac muscle 1 OS=Homo sapiens OX=9606 GN=ACTC1 PE=1 SV=1 - [ACTC_HUMAN]|Beta-actin-like protein 2 OS=Homo sapiens OX=9606 GN=ACTBL2 PE=1 SV=2 - [ACTBL_HUMAN]|Actin, cytoplasmic 1 OS=Homo sapiens OX=9606 GN=ACTB PE=1 SV=1 - [ACTB_HUMAN]	7	3	P68032;Q562R1;P60709		HCD	1	0	1	1	0.007	0.0761	61	60	1.61	0	32	4	56080000	2	398.24	795.472	0	-0.18	27.37	8343	8343	MS2	0/0	0	0	hela_waters_3.raw
High	A	2	TIIQNPTDQQK	5384	Unambiguous	Proliferation-associated protein 2G4 OS=Homo sapiens OX=9606 GN=PA2G4 PE=1 SV=3 - [PA2G4_HUMAN]	1	1	Q9UQ80		HCD	1	0	1	1	0	0.000207	197	196	2.01	0	30	35	20710000	2	643.341	1285.67	0	-0.55	27.37	8345	8345	MS2	0/0	0	0	hela_waters_3.raw
High	A	2	TAGNSEFLGK	5389	Unambiguous	Eukaryotic translation initiation factor 4 gamma 2 OS=Homo sapiens OX=9606 GN=EIF4G2 PE=1 SV=1 - [IF4G2_HUMAN]	1	1	P78344		HCD	1	0	1	1	0.007	0.0813	125	135	0.9	0	51	60	4859000	2	512.259	1023.51	0	0.06	27.38	8347	8347	MS2	0/0	0	0	hela_waters_3.raw
High	A	2	YEQGTGcWQGPNR	5394	Unambiguous	Glucosidase 2 subunit beta OS=Homo sapiens OX=9606 GN=PRKCSH PE=1 SV=2 - [GLU2B_HUMAN]	1	1	P14314	C7(Carbamidomethyl)	HCD	1	0	1	1	0	4.69e-15	40	40	2.5	0	23	54	5850000	2	776.835	1552.66	0	1.44	27.39	8350	8350	MS2	0/0	0	0	hela_waters_3.raw
High	A	2	FGQGGAGPVGGQGPR	4909	Unambiguous	Splicing factor, proline- and glutamine-rich OS=Homo sapiens OX=9606 GN=SFPQ PE=1 SV=2 - [SFPQ_HUMAN]	1	1	P23246		HCD	1	0	1	1	0	2.22e-12	157	169	2.8	0	49	52	5844000	2	671.34	1341.67	0	4.48	27.39	8352	8352	MS2	0/0	0	0	hela_waters_3.raw
High	A	2	VIGSGcNLDSAR	4978	Unambiguous	L-lactate dehydrogenase B chain OS=Homo sapiens OX=9606 GN=LDHB PE=1 SV=2 - [LDHB_HUMAN]|L-lactate dehydrogenase A chain OS=Homo sapiens OX=9606 GN=LDHA PE=1 SV=2 - [LDHA_HUMAN]	4	2	P07195;P00338	C6(Carbamidomethyl)	HCD	1	0	1	1	0	4.64e-16	152	123	2.61	0	7	2	146700000	2	624.804	1248.6	0	-0.32	27.4	8357	8357	MS2	0/0	0	0	hela_waters_3.raw
High	A	2	TVIDYNGER	5411	Unambiguous	Protein disulfide-isomerase OS=Homo sapiens OX=9606 GN=P4HB PE=1 SV=3 - [PDIA1_HUMAN]	1	1	P07237		HCD	1	0	1	1	0	0.0016	128	152	1.47	0	57	5	20590000	2	533.76	1066.51	0	-3.2	27.4	8359	8359	MS2	0/0	0	0	hela_waters_3.raw
High	A	2	LSVDYGK	4963	Unambiguous	Tubulin alpha-1A chain OS=Homo sapiens OX=9606 GN=TUBA1A PE=1 SV=1 - [TBA1A_HUMAN]|Tubulin alpha-1B chain OS=Homo sapiens OX=9606 GN=TUBA1B PE=1 SV=1 - [TBA1B_HUMAN]|Tubulin alpha-1C chain OS=Homo sapiens OX=9606 GN=TUBA1C PE=1 SV=1 - [TBA1C_HUMAN]|Tubulin alpha-4A chain OS=Homo sapiens OX=9606 GN=TUBA4A PE=1 SV=1 - [TBA4A_HUMAN]	5	2	Q9BQE3;P68366		HCD	1	0	1	1	0.004	0.0462	132	140	1.32	0	44	17	13480000	2	391.208	781.409	0	-0.11	27.4	8360	8360	MS2	0/0	0	0	hela_waters_3.raw
High	A	2	SEHPGLSIGDTAK	5415	Unambiguous	High mobility group protein B2 OS=Homo sapiens OX=9606 GN=HMGB2 PE=1 SV=2 - [HMGB2_HUMAN]	1	1	P26583		HCD	1	0	1	1	0.002	0.0134	160	166	1.11	0	43	12	10200000	3	437.89	1311.65	0	0.52	27.4	8361	8361	MS2	0/0	0	0	hela_waters_3.raw
High	A	2	GSQFGQSccLR	5417	Unambiguous	Bifunctional glutamate/proline--tRNA ligase OS=Homo sapiens OX=9606 GN=EPRS PE=1 SV=5 - [SYEP_HUMAN]	1	1	P07814	C8(Carbamidomethyl); C9(Carbamidomethyl)	HCD	1	0	1	1	0	9.05e-07	38	31	1.93	0	43	54	5280000	2	650.281	1299.56	0	-1.31	27.41	8362	8362	MS2	0/0	0	0	hela_waters_3.raw
High	A	2	ILDNTSEPQPGEAR	5419	Unambiguous	Carnitine O-palmitoyltransferase 1, liver isoform OS=Homo sapiens OX=9606 GN=CPT1A PE=1 SV=2 - [CPT1A_HUMAN]	1	1	P50416		HCD	1	0	1	1	0	8.09e-11	136	135	1.96	0	60	55	1866000	2	763.876	1526.74	0	-0.27	27.41	8363	8363	MS2	0/0	0	0	hela_waters_3.raw
High	A	2	VDNDENEHQLSLR	4995	Unambiguous	Nucleophosmin OS=Homo sapiens OX=9606 GN=NPM1 PE=1 SV=2 - [NPM_HUMAN]	1	1	P06748		HCD	1	0	1	1	0	3.26e-14	145	113	2.84	0	18	10	39540000	2	784.87	1568.73	0	1.5	27.41	8365	8365	MS2	0/0	0	0	hela_waters_3.raw
High	A	2	HQEGEIFDTEK	5423	Unambiguous	60S ribosomal protein L6 OS=Homo sapiens OX=9606 GN=RPL6 PE=1 SV=3 - [RL6_HUMAN]	1	1	Q02878		HCD	1	0	1	1	0	1.87e-08	79	89	2.85	0	34	10	28060000	2	666.805	1332.6	0	-3.08	27.41	8366	8366	MS2	0/0	0	0	hela_waters_3.raw
Middle	A	2	VALSEPQPER	5425	Unambiguous	Serrate RNA effector molecule homolog OS=Homo sapiens OX=9606 GN=SRRT PE=1 SV=1 - [SRRT_HUMAN]	1	1	Q9BXP5		HCD	1	0	1	1	0.015	0.219	155	150	1.36	0	25	11	21550000	2	563.298	1125.59	0	-1.11	27.42	8367	8367	MS2	0/0	0	0	hela_waters_3.raw
High	A	2	AANGVVLATEK	5427	Unambiguous	Proteasome subunit alpha type-2 OS=Homo sapiens OX=9606 GN=PSMA2 PE=1 SV=2 - [PSA2_HUMAN]	1	1	P25787		HCD	1	0	1	1	0.001	0.00649	234	247	1.4	0	56	4	21190000	2	536.804	1072.6	0	0.81	27.42	8368	8368	MS2	0/0	0	0	hela_waters_3.raw
High	A	2	DVDEAYMNK	4991	Unambiguous	Keratin, type II cytoskeletal 8 OS=Homo sapiens OX=9606 GN=KRT8 PE=1 SV=7 - [K2C8_HUMAN]	1	1	P05787		HCD	1	0	1	1	0.001	0.013	54	49	1.2	0	32	9	17510000	2	542.735	1084.46	0	1.12	27.42	8369	8369	MS2	0/0	0	0	hela_waters_3.raw
Middle	A	2	VNALVSPR	5432	Unambiguous	Unconventional myosin-XV OS=Homo sapiens OX=9606 GN=MYO15A PE=1 SV=2 - [MYO15_HUMAN]	1	1	Q9UKN7		HCD	1	0	1	2	0.034	0.433	57	65	0.94	0	31	13	10630000	2	428.257	855.506	0	1.6	27.42	8370	8370	MS2	0/0	0	0	hela_waters_3.raw
High	A	2	SYcAEIAHNVSSK	5438	Unambiguous	60S ribosomal protein L32 OS=Homo sapiens OX=9606 GN=RPL32 PE=1 SV=2 - [RL32_HUMAN]	1	1	P62910	C3(Carbamidomethyl)	HCD	1	0	1	1	0	4.21e-16	125	125	3.22	0	36	37	11020000	2	733.341	1465.67	0	0.47	27.43	8374	8374	MS2	0/0	0	0	hela_waters_3.raw
High	A	2	EFHLNESGDPSSK	5315	Unambiguous	Protein SET OS=Homo sapiens OX=9606 GN=SET PE=1 SV=3 - [SET_HUMAN]	2	1	Q01105		HCD	1	0	1	1	0	1.5e-15	86	81	2.61	0	11	11	35440000	2	723.828	1446.65	0	-0.28	27.44	8377	8377	MS2	0/0	0	0	hela_waters_3.raw
High	A	2	TVGATALPR	5444	Unambiguous	T-complex protein 1 subunit theta OS=Homo sapiens OX=9606 GN=CCT8 PE=1 SV=4 - [TCPQ_HUMAN]	1	1	P50990		HCD	1	0	1	1	0	0.00318	116	101	1.64	0	54	7	20550000	2	443.261	885.515	0	0.22	27.44	8378	8378	MS2	0/0	0	0	hela_waters_3.raw
High	A	2	DDEVQVVR	5446	Unambiguous	60S ribosomal protein L26 OS=Homo sapiens OX=9606 GN=RPL26 PE=1 SV=1 - [RL26_HUMAN]	2	1	P61254		HCD	1	0	1	1	0	0.0052	113	125	2.04	0	47	11	7220000	2	480.242	959.477	0	-2.04	27.44	8379	8379	MS2	0/0	0	0	hela_waters_3.raw
High	A	2	VLIAAHGNSLR	5448	Unambiguous	Phosphoglycerate mutase 1 OS=Homo sapiens OX=9606 GN=PGAM1 PE=1 SV=2 - [PGAM1_HUMAN]	2	1	P18669		HCD	1	0	1	1	0	1.78e-05	122	113	2.36	0	47	11	15070000	3	384.228	1150.67	0	-0.25	27.44	8380	8380	MS2	0/0	0	0	hela_waters_3.raw
High	A	2	YEQGTGcWQGPNR	5394	Unambiguous	Glucosidase 2 subunit beta OS=Homo sapiens OX=9606 GN=PRKCSH PE=1 SV=2 - [GLU2B_HUMAN]	1	1	P14314	C7(Carbamidomethyl)	HCD	1	0	1	1	0	4.21e-16	36	36	2.78	0	29	41	11240000	2	776.833	1552.66	0	-0.29	27.44	8381	8381	MS2	0/0	0	0	hela_waters_3.raw
High	A	2	VNEVNQFAAK	5452	Unambiguous	Spectrin alpha chain, non-erythrocytic 1 OS=Homo sapiens OX=9606 GN=SPTAN1 PE=1 SV=3 - [SPTN1_HUMAN]	1	1	Q13813		HCD	1	0	1	1	0.004	0.0534	233	227	1.17	0	41	13	8020000	2	560.292	1119.58	0	-1.49	27.44	8382	8382	MS2	0/0	0	0	hela_waters_3.raw
Middle	A	2	YKPLDLRPK	5454	Unambiguous	60S ribosomal protein L35 OS=Homo sapiens OX=9606 GN=RPL35 PE=1 SV=2 - [RL35_HUMAN]	1	1	P42766		HCD	1	0	1	1	0.042	0.584	130	134	1.64	0	59	37	5539000	3	377.229	1129.67	0	-0.51	27.44	8383	8383	MS2	0/0	0	0	hela_waters_3.raw
High	A	2	QEYDESGPSIVHR	5305	Unambiguous	Actin, cytoplasmic 1 OS=Homo sapiens OX=9606 GN=ACTB PE=1 SV=1 - [ACTB_HUMAN]	7	1	P60709		HCD	1	0	1	1	0	4.21e-16	84	100	3.01	0	1	2	229900000	2	758.855	1516.7	0	-0.42	27.45	8386	8386	MS2	0/0	0	0	hela_waters_3.raw
High	A	2	YTcSFcGK	3942	Unambiguous	60S ribosomal protein L37a OS=Homo sapiens OX=9606 GN=RPL37A PE=1 SV=2 - [RL37A_HUMAN]	2	1	P61513	C3(Carbamidomethyl); C6(Carbamidomethyl)	HCD	1	0	1	2	0.007	0.0803	14	8	1.21	0	55	60	2387000	2	511.707	1022.41	0	-0.84	27.46	8391	8391	MS2	0/0	0	0	hela_waters_3.raw
High	A	2	VDNDENEHQLSLR	4995	Unambiguous	Nucleophosmin OS=Homo sapiens OX=9606 GN=NPM1 PE=1 SV=2 - [NPM_HUMAN]	1	1	P06748		HCD	1	0	1	1	0	1.15e-13	146	115	2.42	0	29	5	82130000	3	523.582	1568.73	0	0.98	27.47	8393	8393	MS2	0/0	0	0	hela_waters_3.raw
High	A	2	NcPHIVVGTPGR	5470	Unambiguous	Spliceosome RNA helicase DDX39B OS=Homo sapiens OX=9606 GN=DDX39B PE=1 SV=1 - [DX39B_HUMAN]	1	1	Q13838	C2(Carbamidomethyl)	HCD	1	0	1	1	0	1.57e-08	223	213	2.27	0	50	45	10650000	2	653.838	1306.67	0	0.26	27.47	8394	8394	MS2	0/0	0	0	hela_waters_3.raw
High	A	2	ILAHNNFVGR	5485	Unambiguous	Insulin-like growth factor 2 mRNA-binding protein 3 OS=Homo sapiens OX=9606 GN=IGF2BP3 PE=1 SV=2 - [IF2B3_HUMAN]|Insulin-like growth factor 2 mRNA-binding protein 1 OS=Homo sapiens OX=9606 GN=IGF2BP1 PE=1 SV=2 - [IF2B1_HUMAN]	2	2	O00425;Q9NZI8		HCD	1	0	1	1	0.001	0.0126	166	141	1.53	0	55	60	2564000	3	380.88	1140.63	0	-0.97	27.48	8401	8401	MS2	0/0	0	0	hela_waters_3.raw
High	A	2	VVGcScVVVK	5487	Unambiguous	40S ribosomal protein S12 OS=Homo sapiens OX=9606 GN=RPS12 PE=1 SV=3 - [RS12_HUMAN]	1	1	P25398	C4(Carbamidomethyl); C6(Carbamidomethyl)	HCD	1	0	1	1	0	0.00424	213	215	1.53	0	18	5	43400000	2	553.788	1106.57	0	-0.19	27.49	8403	8403	MS2	0/0	0	0	hela_waters_3.raw
High	A	2	TANDMIHAENMR	5497	Unambiguous	Moesin OS=Homo sapiens OX=9606 GN=MSN PE=1 SV=3 - [MOES_HUMAN]	1	1	P26038		HCD	1	0	1	1	0	4.21e-16	61	67	2.8	0	55	55	5451000	2	701.813	1402.62	0	-1.64	27.51	8411	8411	MS2	0/0	0	0	hela_waters_3.raw
High	A	2	HQGVMVGMGQK	2468	Unambiguous	Actin, alpha cardiac muscle 1 OS=Homo sapiens OX=9606 GN=ACTC1 PE=1 SV=1 - [ACTC_HUMAN]|Beta-actin-like protein 2 OS=Homo sapiens OX=9606 GN=ACTBL2 PE=1 SV=2 - [ACTBL_HUMAN]|Actin, cytoplasmic 1 OS=Homo sapiens OX=9606 GN=ACTB PE=1 SV=1 - [ACTB_HUMAN]	7	3	P68032;Q562R1;P60709		HCD	1	0	1	1	0	4.69e-06	128	126	2.01	0	20	6	27410000	2	586.289	1171.57	0	-0.76	27.52	8414	8414	MS2	0/0	0	0	hela_waters_3.raw
Middle	A	2	ETMQSLNDR	3808	Unambiguous	Keratin, type I cytoskeletal 18 OS=Homo sapiens OX=9606 GN=KRT18 PE=1 SV=2 - [K1C18_HUMAN]	2	1	P05783		HCD	1	0	1	1	0.047	0.655	77	64	1.45	0	65	60	2557000	2	547.25	1093.49	0	-1.67	27.52	8416	8416	MS2	0/0	0	0	hela_waters_3.raw
High	A	2	SGQGAFGNMcR	5507	Unambiguous	60S ribosomal protein L4 OS=Homo sapiens OX=9606 GN=RPL4 PE=1 SV=5 - [RL4_HUMAN]	1	1	P36578	C10(Carbamidomethyl)	HCD	1	0	1	1	0	6.8e-07	41	29	1.81	0	64	15	13150000	2	592.75	1184.49	0	-0.02	27.52	8417	8417	MS2	0/0	0	0	hela_waters_3.raw
High	A	2	VcALLScTSHK	5509	Unambiguous	Aldose reductase OS=Homo sapiens OX=9606 GN=AKR1B1 PE=1 SV=3 - [ALDR_HUMAN]	1	1	P15121	C2(Carbamidomethyl); C7(Carbamidomethyl)	HCD	1	0	1	1	0	1.46e-07	163	128	1.61	0	58	15	14740000	2	638.312	1275.62	0	-1.43	27.53	8418	8418	MS2	0/0	0	0	hela_waters_3.raw
High	A	2	VEILANDQGNR	5513	Unambiguous	Heat shock 70 kDa protein 6 OS=Homo sapiens OX=9606 GN=HSPA6 PE=1 SV=2 - [HSP76_HUMAN]|Putative heat shock 70 kDa protein 7 OS=Homo sapiens OX=9606 GN=HSPA7 PE=5 SV=2 - [HSP77_HUMAN]|Heat shock cognate 71 kDa protein OS=Homo sapiens OX=9606 GN=HSPA8 PE=1 SV=1 - [HSP7C_HUMAN]|Endoplasmic reticulum chaperone BiP OS=Homo sapiens OX=9606 GN=HSPA5 PE=1 SV=2 - [BIP_HUMAN]|Heat shock 70 kDa protein 1-li…	7	4	P48741;P11142;P11021;P0DMV8		HCD	1	0	1	1	0	1.55e-09	159	175	2.36	0	9	1	218400000	2	614.817	1228.63	0	-0.3	27.53	8421	8421	MS2	0/0	0	0	hela_waters_3.raw
High	A	2	VEIIANDQGNR	5513	Unambiguous	Heat shock 70 kDa protein 6 OS=Homo sapiens OX=9606 GN=HSPA6 PE=1 SV=2 - [HSP76_HUMAN]|Putative heat shock 70 kDa protein 7 OS=Homo sapiens OX=9606 GN=HSPA7 PE=5 SV=2 - [HSP77_HUMAN]|Heat shock cognate 71 kDa protein OS=Homo sapiens OX=9606 GN=HSPA8 PE=1 SV=1 - [HSP7C_HUMAN]|Endoplasmic reticulum chaperone BiP OS=Homo sapiens OX=9606 GN=HSPA5 PE=1 SV=2 - [BIP_HUMAN]|Heat shock 70 kDa protein 1-li…	7	4	P48741;P11142;P11021;P0DMV8		HCD	1	0	1	2	0	1.55e-09	159	175	2.36	0	9	1	218400000	2	614.817	1228.63	0	-0.3	27.53	8421	8421	MS2	0/0	0	0	hela_waters_3.raw
High	A	2	cVVVGDGAVGK	5516	Unambiguous	Ras-related C3 botulinum toxin substrate 1 OS=Homo sapiens OX=9606 GN=RAC1 PE=1 SV=1 - [RAC1_HUMAN]|Rho-related GTP-binding protein RhoG OS=Homo sapiens OX=9606 GN=RHOG PE=1 SV=1 - [RHOG_HUMAN]|Cell division control protein 42 homolog OS=Homo sapiens OX=9606 GN=CDC42 PE=1 SV=2 - [CDC42_HUMAN]	7	3	P63000;P84095;P60953	C1(Carbamidomethyl)	HCD	1	0	1	1	0.008	0.0957	233	254	1.2	0	60	4	22120000	2	530.777	1060.55	0	0.99	27.53	8422	8422	MS2	0/0	0	0	hela_waters_3.raw
High	A	2	DVTNNVHYENYR	5518	Unambiguous	Septin-7 OS=Homo sapiens OX=9606 GN=SEPT7 PE=1 SV=2 - [SEPT7_HUMAN]	1	1	Q16181		HCD	1	0	1	1	0	7.62e-07	64	68	2.07	0	75	52	3286000	2	762.343	1523.68	0	-6.21	27.54	8424	8424	MS2	0/0	0	0	hela_waters_3.raw
High	A	2	NcPHIVVGTPGR	5470	Unambiguous	Spliceosome RNA helicase DDX39B OS=Homo sapiens OX=9606 GN=DDX39B PE=1 SV=1 - [DX39B_HUMAN]	1	1	Q13838	C2(Carbamidomethyl)	HCD	1	0	1	1	0	0.00353	243	234	1.85	0	31	9	13950000	3	436.228	1306.67	0	0.98	27.54	8426	8426	MS2	0/0	0	0	hela_waters_3.raw
High	A	2	TANDMIHAENMR	5497	Unambiguous	Moesin OS=Homo sapiens OX=9606 GN=MSN PE=1 SV=3 - [MOES_HUMAN]	1	1	P26038		HCD	1	0	1	1	0	1.72e-08	60	64	2.04	0	47	11	20820000	3	468.212	1402.62	0	-0.19	27.54	8427	8427	MS2	0/0	0	0	hela_waters_3.raw
High	A	2	IIAEGANGPTTPEADK	5526	Unambiguous	Glutamate dehydrogenase 1, mitochondrial OS=Homo sapiens OX=9606 GN=GLUD1 PE=1 SV=2 - [DHE3_HUMAN]	2	1	P00367		HCD	1	0	1	1	0	1.17e-14	197	204	2.61	0	5	48	6840000	2	792.4	1583.79	0	0.74	27.55	8428	8428	MS2	0/0	0	0	hela_waters_3.raw
High	A	2	MDSTANEVEAVK	5532	Unambiguous	Protein disulfide-isomerase OS=Homo sapiens OX=9606 GN=P4HB PE=1 SV=3 - [PDIA1_HUMAN]	1	1	P07237		HCD	1	0	1	1	0	1.67e-09	114	120	2.21	0	51	51	6839000	2	647.303	1293.6	0	-0.86	27.55	8431	8431	MS2	0/0	0	0	hela_waters_3.raw
High	A	2	TPASPVVHIR	5536	Unambiguous	Heterogeneous nuclear ribonucleoprotein L OS=Homo sapiens OX=9606 GN=HNRNPL PE=1 SV=2 - [HNRPL_HUMAN]	1	1	P14866		HCD	1	0	1	1	0	7.63e-13	133	138	2.48	0	63	16	8703000	3	359.545	1076.62	0	-0.96	27.55	8433	8433	MS2	0/0	0	0	hela_waters_3.raw
High	A	2	NEDVcScSTDTSEVPR	5542	Unambiguous	Nuclear pore complex protein Nup153 OS=Homo sapiens OX=9606 GN=NUP153 PE=1 SV=2 - [NU153_HUMAN]	1	1	P49790	C5(Carbamidomethyl); C7(Carbamidomethyl)	HCD	1	0	1	1	0	0.00105	11	23	1.95	0		60	0	2	928.381	1855.76	0.01	6.56	27.56	8437	8437	MS2	0/0	0	0	hela_waters_3.raw
High	A	2	TNRPPLSLSR	5544	Unambiguous	60S ribosomal protein L18 OS=Homo sapiens OX=9606 GN=RPL18 PE=1 SV=2 - [RL18_HUMAN]	1	1	Q07020		HCD	1	0	1	1	0	0.00393	99	101	2.75	0	16	26	8637000	3	380.888	1140.65	0	1.21	27.56	8438	8438	MS2	0/0	0	0	hela_waters_3.raw
High	A	2	AGFAGDDAPR	3936	Unambiguous	Actin, alpha cardiac muscle 1 OS=Homo sapiens OX=9606 GN=ACTC1 PE=1 SV=1 - [ACTC_HUMAN]|Actin, cytoplasmic 1 OS=Homo sapiens OX=9606 GN=ACTB PE=1 SV=1 - [ACTB_HUMAN]	10	2	P68032;P60709		HCD	1	0	1	1	0.001	0.00731	83	88	1.82	0	23	3	43740000	2	488.728	976.449	0	1.06	27.57	8439	8439	MS2	0/0	0	0	hela_waters_3.raw
High	A	2	ALANSLAcQGK	5131	Unambiguous	Fructose-bisphosphate aldolase A OS=Homo sapiens OX=9606 GN=ALDOA PE=1 SV=2 - [ALDOA_HUMAN]	1	1	P04075	C8(Carbamidomethyl)	HCD	1	0	1	1	0	8.38e-14	224	240	2.09	0	25	6	30370000	2	566.793	1132.58	0	-0.04	27.57	8442	8442	MS2	0/0	0	0	hela_waters_3.raw
High	A	2	EDMAALEK	5139	Unambiguous	Tubulin alpha-1A chain OS=Homo sapiens OX=9606 GN=TUBA1A PE=1 SV=1 - [TBA1A_HUMAN]|Tubulin alpha-1B chain OS=Homo sapiens OX=9606 GN=TUBA1B PE=1 SV=1 - [TBA1B_HUMAN]|Tubulin alpha-1C chain OS=Homo sapiens OX=9606 GN=TUBA1C PE=1 SV=1 - [TBA1C_HUMAN]|Tubulin alpha-4A chain OS=Homo sapiens OX=9606 GN=TUBA4A PE=1 SV=1 - [TBA4A_HUMAN]	4	2	Q9BQE3;P68366		HCD	1	0	1	1	0.002	0.0148	89	92	1.39	0	16	5	34080000	2	453.716	906.424	0	0.59	27.58	8445	8445	MS2	0/0	0	0	hela_waters_3.raw
Middle	A	2	AQTAHIVLEDGTK	5557	Unambiguous	Carbamoyl-phosphate synthase [ammonia], mitochondrial OS=Homo sapiens OX=9606 GN=CPS1 PE=1 SV=2 - [CPSM_HUMAN]	1	1	P31327		HCD	1	0	1	2	0.027	0.365	183	189	1.22	0	48	28	10190000	3	461.581	1382.73	0	0.22	27.58	8446	8446	MS2	0/0	0	0	hela_waters_3.raw
High	A	2	FETLQAQAGK	5560	Unambiguous	Keratin, type II cytoskeletal 7 OS=Homo sapiens OX=9606 GN=KRT7 PE=1 SV=5 - [K2C7_HUMAN]	1	1	P08729		HCD	1	0	1	1	0	3.7e-07	222	213	1.57	0	29	8	19600000	2	546.789	1092.57	0	1.3	27.58	8448	8448	MS2	0/0	0	0	hela_waters_3.raw
Middle	A	2	RPVDSYDIPK	5563	Unambiguous	LIM domain only protein 7 OS=Homo sapiens OX=9606 GN=LMO7 PE=1 SV=3 - [LMO7_HUMAN]	1	1	Q8WWI1		HCD	1	0	1	2	0.049	0.667	240	206	1.62	0	62	25	3526000	2	595.311	1189.62	0	-4.68	27.59	8449	8449	MS2	0/0	0	0	hela_waters_3.raw
High	A	2	LMSNLDSNR	5042	Unambiguous	Protein S100-A4 OS=Homo sapiens OX=9606 GN=S100A4 PE=1 SV=1 - [S10A4_HUMAN]	1	1	P26447		HCD	1	0	1	1	0	1.51e-09	161	165	1.92	0	27	5	38490000	2	525.255	1049.5	0	-1.66	27.59	8452	8452	MS2	0/0	0	0	hela_waters_3.raw
High	A	2	ELNHMLSDTGNR	5570	Unambiguous	Protein S100-A16 OS=Homo sapiens OX=9606 GN=S100A16 PE=1 SV=1 - [S10AG_HUMAN]	1	1	Q96FQ6		HCD	1	0	1	1	0.002	0.0155	101	119	1.77	0	72	60	2647000	2	693.831	1386.65	0.01	8.55	27.6	8454	8454	MS2	0/0	0	0	hela_waters_3.raw
High	A	2	LPTISQR	5499	Unambiguous	Mitochondrial import receptor subunit TOM20 homolog OS=Homo sapiens OX=9606 GN=TOMM20 PE=1 SV=1 - [TOM20_HUMAN]	1	1	Q15388		HCD	1	0	1	1	0.005	0.0614	147	138	1.56	0	58	17	6542000	2	407.742	814.478	0	-0.63	27.6	8455	8455	MS2	0/0	0	0	hela_waters_3.raw
High	A	2	FcLDNGAK	5577	Unambiguous	Phosphoglycerate kinase 1 OS=Homo sapiens OX=9606 GN=PGK1 PE=1 SV=3 - [PGK1_HUMAN]	1	1	P00558	C2(Carbamidomethyl)	HCD	1	0	1	1	0	0.0051	96	90	1.26	0	56	5	14590000	2	462.716	924.425	0	0.73	27.6	8457	8457	MS2	0/0	0	0	hela_waters_3.raw
High	A	2	LPLSTTSNEAcK	5579	Unambiguous	Tetratricopeptide repeat protein 38 OS=Homo sapiens OX=9606 GN=TTC38 PE=1 SV=1 - [TTC38_HUMAN]	1	1	Q5R3I4	C11(Carbamidomethyl)	HCD	1	0	1	1	0	1.38e-11	213	193	2.01	0	56	59	3505000	2	660.826	1320.65	0	-0.77	27.62	8460	8460	MS2	0/0	0	0	hela_waters_3.raw
High	A	2	IFAPNHVVAK	5583	Unambiguous	60S ribosomal protein L18a OS=Homo sapiens OX=9606 GN=RPL18A PE=1 SV=2 - [RL18A_HUMAN]	1	1	Q02543		HCD	1	0	1	1	0	1.88e-06	96	79	2.41	0	16	60	5777000	3	365.882	1095.63	0	-0.2	27.62	8462	8462	MS2	0/0	0	0	hela_waters_3.raw
Middle	A	2	DNNLLGR	5587	Unambiguous	Heat shock 70 kDa protein 6 OS=Homo sapiens OX=9606 GN=HSPA6 PE=1 SV=2 - [HSP76_HUMAN]|Heat shock 70 kDa protein 1-like OS=Homo sapiens OX=9606 GN=HSPA1L PE=1 SV=2 - [HS71L_HUMAN]|Heat shock 70 kDa protein 1A OS=Homo sapiens OX=9606 GN=HSPA1A PE=1 SV=1 - [HS71A_HUMAN]	3	1	P0DMV8		HCD	1	0	1	1	0.022	0.294	131	128	1.55	0	37	21	14730000	2	401.214	801.421	0	-0.16	27.62	8464	8464	MS2	0/0	0	0	hela_waters_3.raw
High	A	2	SNVSDAVAQSTR	4662	Unambiguous	Triosephosphate isomerase OS=Homo sapiens OX=9606 GN=TPI1 PE=1 SV=3 - [TPIS_HUMAN]	1	1	P60174		HCD	1	0	1	1	0	8e-11	171	178	1.98	0	69	6	9999000	2	617.804	1234.6	0	-1.52	27.62	8465	8465	MS2	0/0	0	0	hela_waters_3.raw
High	A	2	HEQNIDcGGGYVK	3581	Unambiguous	Calreticulin OS=Homo sapiens OX=9606 GN=CALR PE=1 SV=1 - [CALR_HUMAN]	1	1	P27797	C7(Carbamidomethyl)	HCD	1	0	1	1	0	3.18e-08	55	59	2.37	0	37	52	3058000	2	738.829	1476.65	0	-2.01	27.63	8467	8467	MS2	0/0	0	0	hela_waters_3.raw
High	A	2	STAGDTHLGGEDFDNR	5595	Unambiguous	Heat shock cognate 71 kDa protein OS=Homo sapiens OX=9606 GN=HSPA8 PE=1 SV=1 - [HSP7C_HUMAN]	2	1	P11142		HCD	1	0	1	1	0.001	0.00818	43	41	1.67	0	23	58	2575000	2	846.368	1691.73	0	2.29	27.63	8469	8469	MS2	0/0	0	0	hela_waters_3.raw
High	A	2	HVVFIAQR	5597	Unambiguous	40S ribosomal protein S7 OS=Homo sapiens OX=9606 GN=RPS7 PE=1 SV=1 - [RS7_HUMAN]	1	1	P62081		HCD	1	0	1	1	0	7.9e-06	113	89	1.95	0	28	5	37100000	2	485.285	969.563	0	0.39	27.64	8471	8471	MS2	0/0	0	0	hela_waters_3.raw
High	A	2	FSGDLDDQTcR	5599	Unambiguous	Lupus La protein OS=Homo sapiens OX=9606 GN=SSB PE=1 SV=2 - [LA_HUMAN]	1	1	P05455	C10(Carbamidomethyl)	HCD	1	0	1	1	0	6.57e-12	19	21	2.71	0	39	44	8701000	2	657.275	1313.54	0	-0.7	27.64	8472	8472	MS2	0/0	0	0	hela_waters_3.raw
High	A	2	SSQSSSQQFSGIGR	5601	Unambiguous	Probable ATP-dependent RNA helicase DDX17 OS=Homo sapiens OX=9606 GN=DDX17 PE=1 SV=2 - [DDX17_HUMAN]	1	1	Q92841		HCD	1	0	1	1	0	4.21e-16	116	114	2.86	0	4	49	7859000	2	728.344	1455.68	0	-1.43	27.64	8473	8473	MS2	0/0	0	0	hela_waters_3.raw
High	A	2	ESEAVEWQQK	5605	Unambiguous	Moesin OS=Homo sapiens OX=9606 GN=MSN PE=1 SV=3 - [MOES_HUMAN]	1	1	P26038		HCD	1	0	1	1	0.001	0.00788	95	89	1.86	0	76	16	9001000	2	617.292	1233.58	0	1.76	27.64	8475	8475	MS2	0/0	0	0	hela_waters_3.raw
High	A	2	EVATNSELVQSGK	4723	Unambiguous	Keratin, type I cytoskeletal 17 OS=Homo sapiens OX=9606 GN=KRT17 PE=1 SV=2 - [K1C17_HUMAN]	2	1	Q04695		HCD	1	0	1	1	0	4.21e-16	218	211	2.53	0	23	12	24530000	2	681.349	1361.69	0	0.33	27.65	8479	8479	MS2	0/0	0	0	hela_waters_3.raw
High	A	2	MREDYDSVEQDGDEPGPQR	5613	Unambiguous	RNA-binding protein 8A OS=Homo sapiens OX=9606 GN=RBM8A PE=1 SV=1 - [RBM8A_HUMAN]	1	1	Q9Y5S9		HCD	1	0	1	1	0	3.79e-07	20	16	2.59	1	0	60	1411000	2	1111.97	2222.93	0	0.44	27.66	8480	8480	MS2	0/0	0	0	hela_waters_3.raw
Middle	A	2	TPEDGVDSASPSAQIGAER	5615	Unambiguous	Retinitis pigmentosa 1-like 1 protein OS=Homo sapiens OX=9606 GN=RP1L1 PE=1 SV=5 - [RP1L1_HUMAN]	1	1	Q8IWN7		HCD	1	0	1	1	0.039	0.525	118	110	1.1	0		60	0	2	943.942	1886.88	0	1.61	27.66	8481	8481	MS2	0/0	0	0	hela_waters_3.raw
High	A	2	DGQVINETSQHHDDLE	5617	Unambiguous	Vimentin OS=Homo sapiens OX=9606 GN=VIM PE=1 SV=4 - [VIME_HUMAN]	1	1	P08670		HCD	1	0	1	1	0	1.24e-06	75	55	2.53	0	30	47	9925000	2	918.903	1836.8	0	-0.69	27.66	8482	8482	MS2	0/0	0	0	hela_waters_3.raw
High	A	2	YQEGGVESAFHK	5619	Unambiguous	Macrophage-capping protein OS=Homo sapiens OX=9606 GN=CAPG PE=1 SV=2 - [CAPG_HUMAN]	1	1	P40121		HCD	1	0	1	1	0	7.15e-06	105	108	2.21	0	39	46	9066000	2	676.317	1351.63	0	-0.01	27.66	8483	8483	MS2	0/0	0	0	hela_waters_3.raw
High	A	2	LAPEYEAAATR	5621	Unambiguous	Protein disulfide-isomerase A3 OS=Homo sapiens OX=9606 GN=PDIA3 PE=1 SV=4 - [PDIA3_HUMAN]	1	1	P30101		HCD	1	0	1	1	0	0.000175	244	211	1.58	0	56	60	6086000	2	596.304	1191.6	0	0.74	27.66	8484	8484	MS2	0/0	0	0	hela_waters_3.raw
High	A	2	VLDSGAPIK	5623	Unambiguous	ATP synthase subunit beta, mitochondrial OS=Homo sapiens OX=9606 GN=ATP5F1B PE=1 SV=3 - [ATPB_HUMAN]	1	1	P06576		HCD	1	0	1	1	0	0.000138	93	96	1.82	0	19	6	34330000	2	450.264	899.52	0	0.67	27.67	8486	8486	MS2	0/0	0	0	hela_waters_3.raw
High	A	2	cYEMASHLR	4703	Unambiguous	Profilin-1 OS=Homo sapiens OX=9606 GN=PFN1 PE=1 SV=2 - [PROF1_HUMAN]	1	1	P07737	C1(Carbamidomethyl)	HCD	1	0	1	1	0	5e-08	67	61	2.42	0	43	53	7359000	2	583.758	1166.51	0	0.68	27.67	8487	8487	MS2	0/0	0	0	hela_waters_3.raw
High	A	2	IGAEVYHNLK	5629	Unambiguous	Alpha-enolase OS=Homo sapiens OX=9606 GN=ENO1 PE=1 SV=2 - [ENOA_HUMAN]	1	1	P06733		HCD	1	0	1	1	0.001	0.00792	188	197	2.37	0	59	17	13140000	2	572.311	1143.61	0	-1.45	27.67	8489	8489	MS2	0/0	0	0	hela_waters_3.raw
Middle	A	2	AVNYFSK	5633	Unambiguous	Clathrin heavy chain 1 OS=Homo sapiens OX=9606 GN=CLTC PE=1 SV=5 - [CLH1_HUMAN]	1	1	Q00610		HCD	1	0	1	1	0.029	0.384	109	107	1.37	0	79	16	5602000	2	414.716	828.424	0	-0.68	27.67	8491	8491	MS2	0/0	0	0	hela_waters_3.raw
High	A	2	GSQFGQSccLR	5417	Unambiguous	Bifunctional glutamate/proline--tRNA ligase OS=Homo sapiens OX=9606 GN=EPRS PE=1 SV=5 - [SYEP_HUMAN]	1	1	P07814	C8(Carbamidomethyl); C9(Carbamidomethyl)	HCD	1	0	1	1	0	0.000316	39	31	1.85	0	52	60	3377000	2	650.282	1299.56	0	-0.27	27.68	8494	8494	MS2	0/0	0	0	hela_waters_3.raw
High	A	2	AEAGPEGVAPAPEGEK	4929	Unambiguous	Hypoxia up-regulated protein 1 OS=Homo sapiens OX=9606 GN=HYOU1 PE=1 SV=1 - [HYOU1_HUMAN]	1	1	Q9Y4L1		HCD	1	0	1	1	0.004	0.0472	168	171	1.05	0	70	58	1128000	2	754.867	1508.73	0	2.34	27.68	8495	8495	MS2	0/0	0	0	hela_waters_3.raw
High	A	2	NSNPALNDNLEK	5641	Unambiguous	Chloride intracellular channel protein 1 OS=Homo sapiens OX=9606 GN=CLIC1 PE=1 SV=4 - [CLIC1_HUMAN]	1	1	O00299		HCD	1	0	1	1	0	2.8e-13	130	148	2.72	0	7	11	34250000	2	664.826	1328.64	0	0.15	27.69	8496	8496	MS2	0/0	0	0	hela_waters_3.raw
High	A	2	QLAVAEGKPPEAPK	5645	Unambiguous	Methionine--tRNA ligase, cytoplasmic OS=Homo sapiens OX=9606 GN=MARS PE=1 SV=2 - [SYMC_HUMAN]	1	1	P56192		HCD	1	0	1	1	0.001	0.00861	153	169	1.48	0	52	23	5765000	3	478.936	1434.79	0	-0.76	27.69	8498	8498	MS2	0/0	0	0	hela_waters_3.raw
Middle	A	2	LPEGDLGK	4496	Unambiguous	Eukaryotic translation initiation factor 5A-1 OS=Homo sapiens OX=9606 GN=EIF5A PE=1 SV=2 - [IF5A1_HUMAN]	2	1	P63241		HCD	1	0	1	1	0.013	0.193	83	89	1.33	0	68	15	6611000	2	414.727	828.447	0	0.67	27.69	8500	8500	MS2	0/0	0	0	hela_waters_3.raw
High	A	2	EESDDEAAVEEEEEEK	5657	Unambiguous	Endoplasmin OS=Homo sapiens OX=9606 GN=HSP90B1 PE=1 SV=1 - [ENPL_HUMAN]	1	1	P14625		HCD	1	0	1	1	0	1.87e-06	6	7	1.59	0	61	60	2278000	2	933.866	1866.72	0	-0.4	27.7	8505	8505	MS2	0/0	0	0	hela_waters_3.raw
High	A	2	NMMAAcDPR	4302	Unambiguous	Tubulin beta-2A chain OS=Homo sapiens OX=9606 GN=TUBB2A PE=1 SV=1 - [TBB2A_HUMAN]|Tubulin beta-3 chain OS=Homo sapiens OX=9606 GN=TUBB3 PE=1 SV=2 - [TBB3_HUMAN]|Tubulin beta-4A chain OS=Homo sapiens OX=9606 GN=TUBB4A PE=1 SV=2 - [TBB4A_HUMAN]|Tubulin beta-4B chain OS=Homo sapiens OX=9606 GN=TUBB4B PE=1 SV=1 - [TBB4B_HUMAN]|Tubulin beta chain OS=Homo sapiens OX=9606 GN=TUBB PE=1 SV=2 - [TBB5_HUMAN…	9	3	P68371;P07437;Q9BUF5	C6(Carbamidomethyl)	HCD	1	0	1	1	0.003	0.0333	14	13	1.62	0	52	10	15310000	2	533.217	1065.43	0	-0.08	27.71	8507	8507	MS2	0/0	0	0	hela_waters_3.raw
High	A	2	IKDPDASKPEDWDER	5252	Unambiguous	Calreticulin OS=Homo sapiens OX=9606 GN=CALR PE=1 SV=1 - [CALR_HUMAN]	1	1	P27797		HCD	1	0	1	1	0	7.08e-05	147	156	2.45	1	69	56	5278000	2	900.927	1800.85	0	4.08	27.72	8511	8511	MS2	0/0	0	0	hela_waters_3.raw
High	A	2	IGAEVYHNLK	5629	Unambiguous	Alpha-enolase OS=Homo sapiens OX=9606 GN=ENO1 PE=1 SV=2 - [ENOA_HUMAN]	1	1	P06733		HCD	1	0	1	1	0	7.31e-05	236	240	2.08	0	10	6	41290000	3	381.877	1143.62	0	0.03	27.72	8512	8512	MS2	0/0	0	0	hela_waters_3.raw
High	A	2	STAGDTHLGGEDFDNR	5595	Unambiguous	Heat shock cognate 71 kDa protein OS=Homo sapiens OX=9606 GN=HSPA8 PE=1 SV=1 - [HSP7C_HUMAN]	2	1	P11142		HCD	1	0	1	1	0	4.06e-10	36	32	1.78	0	40	12	34030000	3	564.58	1691.73	0	0.12	27.73	8515	8515	MS2	0/0	0	0	hela_waters_3.raw
High	A	2	SVTEQGAELSNEER	4818	Unambiguous	14-3-3 protein zeta/delta OS=Homo sapiens OX=9606 GN=YWHAZ PE=1 SV=1 - [1433Z_HUMAN]	1	1	P63104		HCD	1	0	1	1	0	4.21e-16	109	94	3.26	0	27	42	8527000	2	774.859	1548.71	0	-1.91	27.74	8517	8517	MS2	0/0	0	0	hela_waters_3.raw
High	A	2	cAADLGLNK	5676	Unambiguous	Histidine triad nucleotide-binding protein 1 OS=Homo sapiens OX=9606 GN=HINT1 PE=1 SV=2 - [HINT1_HUMAN]	1	1	P49773	C1(Carbamidomethyl)	HCD	1	0	1	1	0	3.46e-06	203	203	2.19	0	31	9	15090000	2	481.241	961.475	0	-1.81	27.74	8519	8519	MS2	0/0	0	0	hela_waters_3.raw
High	A	2	NIIHGSDSVESAEK	4129	Unambiguous	Nucleoside diphosphate kinase A OS=Homo sapiens OX=9606 GN=NME1 PE=1 SV=1 - [NDKA_HUMAN]	1	1	P15531		HCD	1	0	1	1	0.006	0.073	136	146	1.55	0	51	48	4270000	2	743.364	1485.72	0	2.07	27.74	8521	8521	MS2	0/0	0	0	hela_waters_3.raw
Middle	A	2	EIAQDFK	4848	Unambiguous	Histone H3.1 OS=Homo sapiens OX=9606 GN=HIST1H3A PE=1 SV=2 - [H31_HUMAN]	4	1	P68431		HCD	1	0	1	1	0.013	0.2	131	161	1.33	0	14	5	44020000	2	425.719	850.43	0	-0.17	27.75	8524	8524	MS2	0/0	0	0	hela_waters_3.raw
High	A	2	YLAEVAcGDDRK	4480	Unambiguous	14-3-3 protein theta OS=Homo sapiens OX=9606 GN=YWHAQ PE=1 SV=1 - [1433T_HUMAN]	1	1	P27348	C7(Carbamidomethyl)	HCD	1	0	1	1	0	4.23e-08	130	136	2.26	1	75	58	1703000	2	698.831	1396.65	0	1.16	27.75	8525	8525	MS2	0/0	0	0	hela_waters_3.raw
Middle	A	2	MPSGEFAR	5072	Unambiguous	Proliferating cell nuclear antigen OS=Homo sapiens OX=9606 GN=PCNA PE=1 SV=1 - [PCNA_HUMAN]	1	1	P12004		HCD	1	0	1	1	0.01	0.153	107	86	1.33	0	55	13	8981000	2	447.71	894.413	0	-0.89	27.76	8528	8528	MS2	0/0	0	0	hela_waters_3.raw
High	A	2	IYDLNKPEAEPK	5694	Unambiguous	Serine-threonine kinase receptor-associated protein OS=Homo sapiens OX=9606 GN=STRAP PE=1 SV=1 - [STRAP_HUMAN]	1	1	Q9Y3F4		HCD	1	0	1	1	0.008	0.0984	215	222	1.56	0	42	43	10350000	2	708.871	1416.73	0	-1.98	27.76	8529	8529	MS2	0/0	0	0	hela_waters_3.raw
Middle	A	2	LNLVQR	5696	Unambiguous	L-lactate dehydrogenase B chain OS=Homo sapiens OX=9606 GN=LDHB PE=1 SV=2 - [LDHB_HUMAN]|L-lactate dehydrogenase A chain OS=Homo sapiens OX=9606 GN=LDHA PE=1 SV=2 - [LDHA_HUMAN]	3	2	P07195;P00338		HCD	1	0	1	1	0.019	0.255	81	79	1.64	0	71	31	5282000	2	371.732	742.456	0	-1	27.76	8530	8530	MS2	0/0	0	0	hela_waters_3.raw
Middle	A	2	EVSTYIK	4840	Unambiguous	Elongation factor 1-alpha 1 OS=Homo sapiens OX=9606 GN=EEF1A1 PE=1 SV=1 - [EF1A1_HUMAN]	2	1	P68104		HCD	1	0	1	1	0.015	0.216	114	130	1.28	0	46	17	9599000	2	420.229	839.451	0	-0.02	27.77	8532	8532	MS2	0/0	0	0	hela_waters_3.raw
High	A	2	GPPQEEEEEEDEEEEATK	4796	Unambiguous	Hepatoma-derived growth factor OS=Homo sapiens OX=9606 GN=HDGF PE=1 SV=1 - [HDGF_HUMAN]	1	1	P51858		HCD	1	0	1	1	0.002	0.0194		4	1.17	0	0	60	1039000	2	1052.42	2103.83	0	-2.4	27.77	8533	8533	MS2	0/0	0	0	hela_waters_3.raw
High	A	2	SSGSPYGGGYGSGGGSGGYGSR	4697	Unambiguous	Heterogeneous nuclear ribonucleoprotein A3 OS=Homo sapiens OX=9606 GN=HNRNPA3 PE=1 SV=2 - [ROA3_HUMAN]	1	1	P51991		HCD	1	0	1	1	0	0.00428	26	29	1.12	0	65	60	627300	2	955.897	1910.79	0	-1.7	27.77	8534	8534	MS2	0/0	0	0	hela_waters_3.raw
High	A	2	QEYDESGPSIVHR	5305	Unambiguous	Actin, cytoplasmic 1 OS=Homo sapiens OX=9606 GN=ACTB PE=1 SV=1 - [ACTB_HUMAN]	7	1	P60709		HCD	1	0	1	1	0	1.46e-13	90	103	2.7	0	2	2	172400000	3	506.24	1516.7	0	0.82	27.79	8539	8539	MS2	0/0	0	0	hela_waters_3.raw
High	A	2	IKDPDASKPEDWDER	5252	Unambiguous	Calreticulin OS=Homo sapiens OX=9606 GN=CALR PE=1 SV=1 - [CALR_HUMAN]	1	1	P27797		HCD	1	0	1	1	0	8.43e-06	139	145	2.26	1	26	19	11880000	3	600.952	1800.84	0	0.76	27.79	8540	8540	MS2	0/0	0	0	hela_waters_3.raw
High	A	2	ISAVSVAER	5710	Unambiguous	ATP-dependent RNA helicase A OS=Homo sapiens OX=9606 GN=DHX9 PE=1 SV=4 - [DHX9_HUMAN]	1	1	Q08211		HCD	1	0	1	1	0.002	0.0204	338	333	2.31	0	29	6	18700000	2	466.261	931.516	0	-5.54	27.79	8541	8541	MS2	0/0	0	0	hela_waters_3.raw
High	A	2	VSDATGQMNLTK	5712	Unambiguous	Macrophage-capping protein OS=Homo sapiens OX=9606 GN=CAPG PE=1 SV=2 - [CAPG_HUMAN]	1	1	P40121		HCD	1	0	1	1	0	3.69e-11	159	156	2.16	0	28	39	14220000	2	632.811	1264.62	0	-3.92	27.79	8542	8542	MS2	0/0	0	0	hela_waters_3.raw
High	A	2	HTGPNSPDTANDGFVR	4725	Unambiguous	Heterogeneous nuclear ribonucleoprotein H2 OS=Homo sapiens OX=9606 GN=HNRNPH2 PE=1 SV=1 - [HNRH2_HUMAN]|Heterogeneous nuclear ribonucleoprotein H OS=Homo sapiens OX=9606 GN=HNRNPH1 PE=1 SV=4 - [HNRH1_HUMAN]	2	2	P55795;P31943		HCD	1	0	1	1	0.001	0.0108	98	98	1.86	0	49	52	4846000	2	842.887	1684.77	0	-0.63	27.8	8545	8545	MS2	0/0	0	0	hela_waters_3.raw
High	A	2	YESLTDPSK	4506	Unambiguous	Heat shock protein HSP 90-beta OS=Homo sapiens OX=9606 GN=HSP90AB1 PE=1 SV=4 - [HS90B_HUMAN]|Heat shock protein HSP 90-alpha OS=Homo sapiens OX=9606 GN=HSP90AA1 PE=1 SV=5 - [HS90A_HUMAN]|Putative heat shock protein HSP 90-beta 4 OS=Homo sapiens OX=9606 GN=HSP90AB4P PE=5 SV=1 - [H90B4_HUMAN]	5	2	P08238;P07900		HCD	1	0	1	1	0.003	0.0378	108	113	0.93	0	59	13	6046000	2	520.25	1039.49	0	-0.66	27.8	8547	8547	MS2	0/0	0	0	hela_waters_3.raw
Middle	A	2	LPANHPLLTGQR	5726	Unambiguous	V-type proton ATPase catalytic subunit A OS=Homo sapiens OX=9606 GN=ATP6V1A PE=1 SV=2 - [VATA_HUMAN]	1	1	P38606		HCD	1	0	1	2	0.045	0.623	200	196	1.18	0	73	28	2324000	3	439.583	1316.74	0	-6.23	27.8	8549	8549	MS2	0/0	0	0	hela_waters_3.raw
High	A	2	GSGTAEVELK	4885	Unambiguous	Pyruvate kinase PKM OS=Homo sapiens OX=9606 GN=PKM PE=1 SV=4 - [KPYM_HUMAN]	1	1	P14618		HCD	1	0	1	1	0.002	0.0141	234	220	1.31	0	60	17	9085000	2	495.76	990.514	0	3.48	27.81	8552	8552	MS2	0/0	0	0	hela_waters_3.raw
High	A	2	AAEAAAAPAESAAPAAGEEPSK	4808	Unambiguous	Brain acid soluble protein 1 OS=Homo sapiens OX=9606 GN=BASP1 PE=1 SV=2 - [BASP1_HUMAN]	1	1	P80723		HCD	1	0	1	1	0	0.00466	142	146	2.04	0	57	60	1804000	2	983.975	1966.94	0	3.34	27.82	8558	8558	MS2	0/0	0	0	hela_waters_3.raw
High	A	2	ETPAATEAPSSTPK	3188	Unambiguous	Brain acid soluble protein 1 OS=Homo sapiens OX=9606 GN=BASP1 PE=1 SV=2 - [BASP1_HUMAN]	1	1	P80723		HCD	1	0	1	1	0	0.000341	158	138	1.27	0	92	59	1305000	2	693.844	1386.68	0	3.57	27.82	8559	8559	MS2	0/0	0	0	hela_waters_3.raw
High	A	2	TPAQYDASELK	5751	Unambiguous	Annexin A2 OS=Homo sapiens OX=9606 GN=ANXA2 PE=1 SV=2 - [ANXA2_HUMAN]	2	1	P07355		HCD	1	0	1	1	0	4.21e-16	178	171	2.82	0	26	8	31520000	2	611.801	1222.59	0	-0.23	27.84	8565	8565	MS2	0/0	0	0	hela_waters_3.raw
High	A	2	RPAEDMEEEQAFK	5753	Unambiguous	Heterogeneous nuclear ribonucleoprotein K OS=Homo sapiens OX=9606 GN=HNRNPK PE=1 SV=1 - [HNRPK_HUMAN]	1	1	P61978		HCD	1	0	1	1	0	1.72e-13	62	52	3.68	0	1	27	28170000	2	790.356	1579.7	0	-0.96	27.84	8566	8566	MS2	0/0	0	0	hela_waters_3.raw
High	A	2	ATAGDTHLGGEDFDNR	5755	Unambiguous	Heat shock 70 kDa protein 6 OS=Homo sapiens OX=9606 GN=HSPA6 PE=1 SV=2 - [HSP76_HUMAN]|Heat shock 70 kDa protein 1-like OS=Homo sapiens OX=9606 GN=HSPA1L PE=1 SV=2 - [HS71L_HUMAN]|Heat shock 70 kDa protein 1A OS=Homo sapiens OX=9606 GN=HSPA1A PE=1 SV=1 - [HS71A_HUMAN]|Putative heat shock 70 kDa protein 7 OS=Homo sapiens OX=9606 GN=HSPA7 PE=5 SV=2 - [HSP77_HUMAN]	4	2	P0DMV8;P48741		HCD	1	0	1	1	0	4.21e-16	62	49	2.25	0	26	14	12500000	3	559.248	1675.73	0	0.07	27.84	8567	8567	MS2	0/0	0	0	hela_waters_3.raw
High	A	2	ATAGDTHLGGEDFDNR	5755	Unambiguous	Heat shock 70 kDa protein 6 OS=Homo sapiens OX=9606 GN=HSPA6 PE=1 SV=2 - [HSP76_HUMAN]|Heat shock 70 kDa protein 1-like OS=Homo sapiens OX=9606 GN=HSPA1L PE=1 SV=2 - [HS71L_HUMAN]|Heat shock 70 kDa protein 1A OS=Homo sapiens OX=9606 GN=HSPA1A PE=1 SV=1 - [HS71A_HUMAN]|Putative heat shock 70 kDa protein 7 OS=Homo sapiens OX=9606 GN=HSPA7 PE=5 SV=2 - [HSP77_HUMAN]	4	2	P0DMV8;P48741		HCD	1	0	1	1	0	4.21e-16	62	49	3.46	0	9	39	13880000	2	838.368	1675.73	0	-0.65	27.85	8572	8572	MS2	0/0	0	0	hela_waters_3.raw
High	A	2	ADGYVLEGK	5767	Unambiguous	40S ribosomal protein S8 OS=Homo sapiens OX=9606 GN=RPS8 PE=1 SV=2 - [RS8_HUMAN]	1	1	P62241		HCD	1	0	1	1	0	0.00112	160	162	1.54	0	13	5	36550000	2	476.242	951.478	0	-0.61	27.86	8575	8575	MS2	0/0	0	0	hela_waters_3.raw
High	A	2	SEHPGLSIGDTAK	5415	Unambiguous	High mobility group protein B2 OS=Homo sapiens OX=9606 GN=HMGB2 PE=1 SV=2 - [HMGB2_HUMAN]	1	1	P26583		HCD	1	0	1	1	0	1.01e-06	172	181	2.04	0	76	49	4249000	2	656.334	1311.66	0	5.4	27.86	8576	8576	MS2	0/0	0	0	hela_waters_3.raw
High	A	2	LcDSYEIRPGK	5775	Unambiguous	Heterogeneous nuclear ribonucleoprotein R OS=Homo sapiens OX=9606 GN=HNRNPR PE=1 SV=1 - [HNRPR_HUMAN]	1	1	O43390	C2(Carbamidomethyl)	HCD	1	0	1	1	0	1.89e-12	153	167	2.41	0	12	37	15050000	2	669.329	1337.65	0	-1.34	27.87	8580	8580	MS2	0/0	0	0	hela_waters_3.raw
High	A	2	VVGDVAYDEAK	5781	Unambiguous	C-1-tetrahydrofolate synthase, cytoplasmic OS=Homo sapiens OX=9606 GN=MTHFD1 PE=1 SV=3 - [C1TC_HUMAN]	1	1	P11586		HCD	1	0	1	1	0	0.000221	165	165	1.82	0	35	15	23200000	2	583.29	1165.57	0	-0.9	27.87	8583	8583	MS2	0/0	0	0	hela_waters_3.raw
High	A	2	cYScGEFGHIQK	5783	Unambiguous	Cellular nucleic acid-binding protein OS=Homo sapiens OX=9606 GN=CNBP PE=1 SV=1 - [CNBP_HUMAN]	1	1	P62633	C1(Carbamidomethyl); C4(Carbamidomethyl)	HCD	1	0	1	1	0.005	0.0588	27	28	1.03	0	55	14	11810000	3	495.88	1485.63	0	0.32	27.87	8584	8584	MS2	0/0	0	0	hela_waters_3.raw
High	A	2	EAPPMEKPEVVK	5240	Unambiguous	40S ribosomal protein S15 OS=Homo sapiens OX=9606 GN=RPS15 PE=1 SV=2 - [RS15_HUMAN]	1	1	P62841		HCD	1	0	1	1	0.001	0.0084	203	171	1.57	0	73	47	7988000	2	677.357	1353.71	0	-0.49	27.88	8586	8586	MS2	0/0	0	0	hela_waters_3.raw
High	A	2	IIAPPER	4449	Unambiguous	Actin, alpha cardiac muscle 1 OS=Homo sapiens OX=9606 GN=ACTC1 PE=1 SV=1 - [ACTC_HUMAN]|Beta-actin-like protein 2 OS=Homo sapiens OX=9606 GN=ACTBL2 PE=1 SV=2 - [ACTBL_HUMAN]|Actin, cytoplasmic 1 OS=Homo sapiens OX=9606 GN=ACTB PE=1 SV=1 - [ACTB_HUMAN]	7	3	P68032;Q562R1;P60709		HCD	1	0	1	1	0.008	0.0982	57	57	1.71	0	32	5	33900000	2	398.24	795.472	0	-0.72	27.88	8588	8588	MS2	0/0	0	0	hela_waters_3.raw
High	A	2	EFTEAVEAK	5791	Unambiguous	Prohibitin OS=Homo sapiens OX=9606 GN=PHB PE=1 SV=1 - [PHB_HUMAN]	1	1	P35232		HCD	1	0	1	1	0	0.00102	115	119	1.84	0	43	60	5674000	2	512.254	1023.5	0	0.42	27.88	8589	8589	MS2	0/0	0	0	hela_waters_3.raw
High	A	2	TIIQNPTDQQK	5384	Unambiguous	Proliferation-associated protein 2G4 OS=Homo sapiens OX=9606 GN=PA2G4 PE=1 SV=3 - [PA2G4_HUMAN]	1	1	Q9UQ80		HCD	1	0	1	1	0.004	0.0472	180	178	1.64	0	29	41	13090000	2	643.34	1285.67	0	-1.88	27.88	8590	8590	MS2	0/0	0	0	hela_waters_3.raw
High	A	2	EATDAIGHLDR	5795	Unambiguous	Interleukin enhancer-binding factor 3 OS=Homo sapiens OX=9606 GN=ILF3 PE=1 SV=3 - [ILF3_HUMAN]	1	1	Q12906		HCD	1	0	1	1	0	4.16e-10	150	151	2.38	0	35	46	10930000	2	599.296	1197.58	0	-1.36	27.89	8591	8591	MS2	0/0	0	0	hela_waters_3.raw
High	A	2	VIGSGcNLDSAR	4978	Unambiguous	L-lactate dehydrogenase B chain OS=Homo sapiens OX=9606 GN=LDHB PE=1 SV=2 - [LDHB_HUMAN]|L-lactate dehydrogenase A chain OS=Homo sapiens OX=9606 GN=LDHA PE=1 SV=2 - [LDHA_HUMAN]	4	2	P07195;P00338	C6(Carbamidomethyl)	HCD	1	0	1	1	0	2e-14	150	122	2.24	0	10	4	70980000	2	624.802	1248.6	0	-3.35	27.9	8595	8595	MS2	0/0	0	0	hela_waters_3.raw
High	A	2	ScVEEPEPEPEAAEGDGDK	5804	Unambiguous	Hepatoma-derived growth factor OS=Homo sapiens OX=9606 GN=HDGF PE=1 SV=1 - [HDGF_HUMAN]	1	1	P51858	C2(Carbamidomethyl)	HCD	1	0	1	1	0	7.42e-15	14	15	2.45	0	30	60	2733000	2	1022.92	2044.83	0	-0.72	27.9	8597	8597	MS2	0/0	0	0	hela_waters_3.raw
High	A	2	INISEGNcPER	4830	Unambiguous	Poly(rC)-binding protein 1 OS=Homo sapiens OX=9606 GN=PCBP1 PE=1 SV=2 - [PCBP1_HUMAN]|Poly(rC)-binding protein 2 OS=Homo sapiens OX=9606 GN=PCBP2 PE=1 SV=1 - [PCBP2_HUMAN]	3	2	Q15365;Q15366	C8(Carbamidomethyl)	HCD	1	0	1	1	0	4.21e-16	92	84	2.58	0	44	48	7481000	2	644.8	1288.59	0	-1.95	27.91	8599	8599	MS2	0/0	0	0	hela_waters_3.raw
High	A	2	LSVDYGK	4963	Unambiguous	Tubulin alpha-1A chain OS=Homo sapiens OX=9606 GN=TUBA1A PE=1 SV=1 - [TBA1A_HUMAN]|Tubulin alpha-1B chain OS=Homo sapiens OX=9606 GN=TUBA1B PE=1 SV=1 - [TBA1B_HUMAN]|Tubulin alpha-1C chain OS=Homo sapiens OX=9606 GN=TUBA1C PE=1 SV=1 - [TBA1C_HUMAN]|Tubulin alpha-4A chain OS=Homo sapiens OX=9606 GN=TUBA4A PE=1 SV=1 - [TBA4A_HUMAN]	5	2	Q9BQE3;P68366		HCD	1	0	1	1	0.004	0.0493	132	140	1.52	0	50	24	7059000	2	391.208	781.408	0	-1.36	27.91	8601	8601	MS2	0/0	0	0	hela_waters_3.raw
High	A	2	IMATPEQVGK	5812	Unambiguous	X-ray repair cross-complementing protein 6 OS=Homo sapiens OX=9606 GN=XRCC6 PE=1 SV=2 - [XRCC6_HUMAN]	1	1	P12956		HCD	1	0	1	1	0.002	0.0136	236	234	1.33	0	33	5	22330000	2	537.287	1073.57	0	0.18	27.91	8602	8602	MS2	0/0	0	0	hela_waters_3.raw
High	A	2	ETAEAYLGK	5814	Unambiguous	Endoplasmic reticulum chaperone BiP OS=Homo sapiens OX=9606 GN=HSPA5 PE=1 SV=2 - [BIP_HUMAN]	1	1	P11021		HCD	1	0	1	1	0	0.00422	133	147	1.54	0	67	10	9679000	2	491.25	981.492	0	3.51	27.92	8603	8603	MS2	0/0	0	0	hela_waters_3.raw
High	A	2	NNASTDYDLSDK	4676	Unambiguous	60S ribosomal protein L3 OS=Homo sapiens OX=9606 GN=RPL3 PE=1 SV=2 - [RL3_HUMAN]	1	1	P39023		HCD	1	0	1	1	0	1.54e-05	43	37	1.38	0	60	54	5006000	2	671.792	1342.58	0	0.61	27.92	8604	8604	MS2	0/0	0	0	hela_waters_3.raw
High	A	2	AYTNFDAER	5820	Unambiguous	Annexin A2 OS=Homo sapiens OX=9606 GN=ANXA2 PE=1 SV=2 - [ANXA2_HUMAN]	2	1	P07355		HCD	1	0	1	1	0	1.2e-06	61	58	2.07	0	22	2	106500000	2	543.746	1086.49	0	0.39	27.93	8607	8607	MS2	0/0	0	0	hela_waters_3.raw
High	A	2	VDNDENEHQLSLR	4995	Unambiguous	Nucleophosmin OS=Homo sapiens OX=9606 GN=NPM1 PE=1 SV=2 - [NPM_HUMAN]	1	1	P06748		HCD	1	0	1	1	0	1.55e-13	148	117	2.83	0	16	34	16630000	2	784.869	1568.73	0	0.17	27.93	8608	8608	MS2	0/0	0	0	hela_waters_3.raw
Middle	A	2	TNEAQAIETAR	3921	Unambiguous	Ubiquitin-conjugating enzyme E2 N OS=Homo sapiens OX=9606 GN=UBE2N PE=1 SV=1 - [UBE2N_HUMAN]	2	1	P61088		HCD	1	0	1	1	0.02	0.268	202	211	1.53	0	38	16	7808000	2	602.304	1203.6	0	4.07	27.93	8609	8609	MS2	0/0	0	0	hela_waters_3.raw
High	A	2	SYcAEIAHNVSSK	5438	Unambiguous	60S ribosomal protein L32 OS=Homo sapiens OX=9606 GN=RPL32 PE=1 SV=2 - [RL32_HUMAN]	1	1	P62910	C3(Carbamidomethyl)	HCD	1	0	1	1	0	1.69e-13	126	118	2.44	0	19	37	13960000	2	733.339	1465.67	0	-2.11	27.93	8611	8611	MS2	0/0	0	0	hela_waters_3.raw
High	A	2	ALQAQEIEcR	5836	Unambiguous	Procollagen galactosyltransferase 1 OS=Homo sapiens OX=9606 GN=COLGALT1 PE=1 SV=1 - [GT251_HUMAN]	1	1	Q8NBJ5	C9(Carbamidomethyl)	HCD	1	0	1	1	0	2.07e-08	146	162	2.08	0	37	16	13870000	2	609.303	1217.6	0	3.25	27.95	8617	8617	MS2	0/0	0	0	hela_waters_3.raw
High	A	2	LIPDGcGVK	5838	Unambiguous	60S ribosomal protein L10 OS=Homo sapiens OX=9606 GN=RPL10 PE=1 SV=4 - [RL10_HUMAN]	1	1	P27635	C6(Carbamidomethyl)	HCD	1	0	1	1	0	0.00554	185	188	1.45	0	29	4	25950000	2	479.755	958.503	0	-0.08	27.95	8618	8618	MS2	0/0	0	0	hela_waters_3.raw
High	A	2	QEYDESGPSIVHR	5305	Unambiguous	Actin, cytoplasmic 1 OS=Homo sapiens OX=9606 GN=ACTB PE=1 SV=1 - [ACTB_HUMAN]	7	1	P60709		HCD	1	0	1	1	0	4.21e-16	92	108	2.94	0	10	5	60970000	2	758.855	1516.7	0	-0.26	27.95	8620	8620	MS2	0/0	0	0	hela_waters_3.raw
High	A	2	GDATVSYEDPPTAK	5842	Unambiguous	RNA-binding protein EWS OS=Homo sapiens OX=9606 GN=EWSR1 PE=1 SV=1 - [EWS_HUMAN]	1	1	Q01844		HCD	1	0	1	1	0	2.36e-13	103	91	2.5	0	17	37	13880000	2	725.838	1450.67	0	-0.65	27.96	8621	8621	MS2	0/0	0	0	hela_waters_3.raw
High	A	2	HILANFK	5844	Unambiguous	Translationally-controlled tumor protein OS=Homo sapiens OX=9606 GN=TPT1 PE=1 SV=1 - [TCTP_HUMAN]	2	1	P13693		HCD	1	0	1	1	0.007	0.0838	99	105	1.78	0	58	8	12430000	2	421.748	842.488	0	-0.37	27.96	8622	8622	MS2	0/0	0	0	hela_waters_3.raw
High	A	2	FIMESGAK	5846	Unambiguous	40S ribosomal protein S3 OS=Homo sapiens OX=9606 GN=RPS3 PE=1 SV=2 - [RS3_HUMAN]	1	1	P23396		HCD	1	0	1	1	0	0.00192	119	118	1.94	0	42	19	8597000	2	441.722	882.437	0	-1.81	27.96	8623	8623	MS2	0/0	0	0	hela_waters_3.raw
High	A	2	YEQGTGcWQGPNR	5394	Unambiguous	Glucosidase 2 subunit beta OS=Homo sapiens OX=9606 GN=PRKCSH PE=1 SV=2 - [GLU2B_HUMAN]	1	1	P14314	C7(Carbamidomethyl)	HCD	1	0	1	1	0	9.9e-11	33	30	2.29	0	50	52	2978000	2	776.832	1552.66	0	-1.79	27.96	8625	8625	MS2	0/0	0	0	hela_waters_3.raw
High	A	2	IDIVENR	5850	Unambiguous	Argininosuccinate synthase OS=Homo sapiens OX=9606 GN=ASS1 PE=1 SV=2 - [ASSY_HUMAN]	1	1	P00966		HCD	1	0	1	1	0.001	0.0081	176	182	1.87	0	23	4	42690000	2	429.738	858.468	0	0.15	27.97	8626	8626	MS2	0/0	0	0	hela_waters_3.raw
High	A	2	NSEPAGLETPEAK	5852	Unambiguous	Bifunctional glutamate/proline--tRNA ligase OS=Homo sapiens OX=9606 GN=EPRS PE=1 SV=5 - [SYEP_HUMAN]	1	1	P07814		HCD	1	0	1	1	0	0.000257	138	147	1.72	0	53	56	4776000	2	671.829	1342.65	0	1.85	27.97	8627	8627	MS2	0/0	0	0	hela_waters_3.raw
High	A	2	ASLENSLR	5854	Unambiguous	Keratin, type I cytoskeletal 18 OS=Homo sapiens OX=9606 GN=KRT18 PE=1 SV=2 - [K1C18_HUMAN]	1	1	P05783		HCD	1	0	1	1	0	0.000138	247	275	1.73	0	44	6	15440000	2	445.24	889.474	0	-0.15	27.97	8628	8628	MS2	0/0	0	0	hela_waters_3.raw
High	A	2	VDNDENEHQLSLR	4995	Unambiguous	Nucleophosmin OS=Homo sapiens OX=9606 GN=NPM1 PE=1 SV=2 - [NPM_HUMAN]	1	1	P06748		HCD	1	0	1	1	0	2.3e-12	148	118	2.52	0	33	11	38600000	3	523.582	1568.73	0	0.4	27.98	8631	8631	MS2	0/0	0	0	hela_waters_3.raw
High	A	2	QADVNLVNAK	5860	Unambiguous	D-3-phosphoglycerate dehydrogenase OS=Homo sapiens OX=9606 GN=PHGDH PE=1 SV=4 - [SERA_HUMAN]	1	1	O43175		HCD	1	0	1	1	0.002	0.0142	185	183	2.31	0	38	6	30100000	2	536.294	1071.58	0	1.06	27.98	8632	8632	MS2	0/0	0	0	hela_waters_3.raw
High	A	2	GTAVVNGEFK	5862	Unambiguous	Thioredoxin-dependent peroxide reductase, mitochondrial OS=Homo sapiens OX=9606 GN=PRDX3 PE=1 SV=3 - [PRDX3_HUMAN]	1	1	P30048		HCD	1	0	1	1	0.001	0.0118	237	234	1.65	0	55	18	5581000	2	511.27	1021.53	0	2.05	27.98	8633	8633	MS2	0/0	0	0	hela_waters_3.raw
High	A	2	EGNPEEDLTADK	5864	Unambiguous	Macrophage-capping protein OS=Homo sapiens OX=9606 GN=CAPG PE=1 SV=2 - [CAPG_HUMAN]	1	1	P40121		HCD	1	0	1	1	0	8.16e-11	56	47	2.11	0	51	58	4433000	2	659.294	1317.58	0	0.79	27.98	8634	8634	MS2	0/0	0	0	hela_waters_3.raw
High	A	2	LKDDEVAQLK	4946	Unambiguous	L-lactate dehydrogenase B chain OS=Homo sapiens OX=9606 GN=LDHB PE=1 SV=2 - [LDHB_HUMAN]	1	1	P07195		HCD	1	0	1	1	0.001	0.00662	204	202	2.06	1	52	47	11230000	2	579.821	1158.63	0	-1.6	27.98	8635	8635	MS2	0/0	0	0	hela_waters_3.raw
High	A	2	NFSDNQLQEGK	5097	Unambiguous	Transgelin-2 OS=Homo sapiens OX=9606 GN=TAGLN2 PE=1 SV=3 - [TAGL2_HUMAN]	1	1	P37802		HCD	1	0	1	1	0.001	0.00665	96	97	1.44	0	34	44	8884000	2	640.299	1279.59	0	-0.58	27.99	8637	8637	MS2	0/0	0	0	hela_waters_3.raw
High	A	2	QPGNETADTVLK	5870	Unambiguous	Prefoldin subunit 3 OS=Homo sapiens OX=9606 GN=VBP1 PE=1 SV=3 - [PFD3_HUMAN]	1	1	P61758		HCD	1	0	1	1	0.002	0.016	172	166	1.88	0	45	49	7021000	2	636.825	1272.64	0	0.22	27.99	8638	8638	MS2	0/0	0	0	hela_waters_3.raw
High	A	2	EFHLNESGDPSSK	5315	Unambiguous	Protein SET OS=Homo sapiens OX=9606 GN=SET PE=1 SV=3 - [SET_HUMAN]	2	1	Q01105		HCD	1	0	1	1	0	9.12e-11	85	81	2.99	0	44	42	9844000	2	723.828	1446.65	0	-0.11	27.99	8640	8640	MS2	0/0	0	0	hela_waters_3.raw
High	A	2	YKPLDLRPK	5454	Unambiguous	60S ribosomal protein L35 OS=Homo sapiens OX=9606 GN=RPL35 PE=1 SV=2 - [RL35_HUMAN]	1	1	P42766		HCD	1	0	1	1	0.002	0.0137	130	137	1.72	0	84	60	1560000	3	377.229	1129.67	0	0.95	28	8644	8644	MS2	0/0	0	0	hela_waters_3.raw
High	A	2	GTVEPQLEAR	5884	Unambiguous	Filamin-A OS=Homo sapiens OX=9606 GN=FLNA PE=1 SV=4 - [FLNA_HUMAN]	1	1	P21333		HCD	1	0	1	1	0	4.87e-09	151	178	2.12	0	44	18	12630000	2	550.291	1099.58	0	0.66	28.01	8646	8646	MS2	0/0	0	0	hela_waters_3.raw
High	A	2	HcNMVLENVK	5886	Unambiguous	Small nuclear ribonucleoprotein Sm D2 OS=Homo sapiens OX=9606 GN=SNRPD2 PE=1 SV=1 - [SMD2_HUMAN]	1	1	P62316	C2(Carbamidomethyl)	HCD	1	0	1	1	0	0.00192	94	97	1.99	0	46	6	26840000	2	622.302	1243.6	0	3.02	28.01	8647	8647	MS2	0/0	0	0	hela_waters_3.raw
High	A	2	HQGVMVGMGQK	2468	Unambiguous	Actin, alpha cardiac muscle 1 OS=Homo sapiens OX=9606 GN=ACTC1 PE=1 SV=1 - [ACTC_HUMAN]|Beta-actin-like protein 2 OS=Homo sapiens OX=9606 GN=ACTBL2 PE=1 SV=2 - [ACTBL_HUMAN]|Actin, cytoplasmic 1 OS=Homo sapiens OX=9606 GN=ACTB PE=1 SV=1 - [ACTB_HUMAN]	7	3	P68032;Q562R1;P60709		HCD	1	0	1	1	0	1.92e-06	116	112	2.57	0	15	15	18150000	2	586.288	1171.57	0	-2.01	28.02	8651	8651	MS2	0/0	0	0	hela_waters_3.raw
High	A	2	VVAVDcGIK	5894	Unambiguous	Carbamoyl-phosphate synthase [ammonia], mitochondrial OS=Homo sapiens OX=9606 GN=CPS1 PE=1 SV=2 - [CPSM_HUMAN]	1	1	P31327	C6(Carbamidomethyl)	HCD	1	0	1	1	0	7.81e-06	271	270	1.76	0	44	4	25230000	2	480.763	960.519	0	0.91	28.02	8653	8653	MS2	0/0	0	0	hela_waters_3.raw
High	A	2	KPPLLNNADSVQAK	5896	Unambiguous	Poly [ADP-ribose] polymerase 1 OS=Homo sapiens OX=9606 GN=PARP1 PE=1 SV=4 - [PARP1_HUMAN]	1	1	P09874		HCD	1	0	1	1	0	4.21e-16	146	139	2.68	0	24	45	8328000	2	747.917	1494.83	0	-0.23	28.02	8654	8654	MS2	0/0	0	0	hela_waters_3.raw
High	A	2	SGQGAFGNMcR	5507	Unambiguous	60S ribosomal protein L4 OS=Homo sapiens OX=9606 GN=RPL4 PE=1 SV=5 - [RL4_HUMAN]	1	1	P36578	C10(Carbamidomethyl)	HCD	1	0	1	1	0	2.26e-08	34	29	2.39	0	57	47	7482000	2	592.751	1184.49	0	0.8	28.03	8656	8656	MS2	0/0	0	0	hela_waters_3.raw
High	A	2	MIESLTK	5900	Unambiguous	RuvB-like 2 OS=Homo sapiens OX=9606 GN=RUVBL2 PE=1 SV=3 - [RUVB2_HUMAN]	1	1	Q9Y230		HCD	1	0	1	1	0.006	0.068	212	196	1.25	0	38	22	6593000	2	411.227	821.446	0	2.69	28.03	8657	8657	MS2	0/0	0	0	hela_waters_3.raw
High	A	2	VEIIANDQGNR	5513	Unambiguous	Heat shock 70 kDa protein 6 OS=Homo sapiens OX=9606 GN=HSPA6 PE=1 SV=2 - [HSP76_HUMAN]|Putative heat shock 70 kDa protein 7 OS=Homo sapiens OX=9606 GN=HSPA7 PE=5 SV=2 - [HSP77_HUMAN]|Heat shock cognate 71 kDa protein OS=Homo sapiens OX=9606 GN=HSPA8 PE=1 SV=1 - [HSP7C_HUMAN]|Endoplasmic reticulum chaperone BiP OS=Homo sapiens OX=9606 GN=HSPA5 PE=1 SV=2 - [BIP_HUMAN]|Heat shock 70 kDa protein 1-li…	7	4	P48741;P11142;P11021;P0DMV8		HCD	1	0	1	1	0	2.07e-15	163	179	2.59	0	17	4	54500000	2	614.818	1228.63	0	0.3	28.04	8659	8659	MS2	0/0	0	0	hela_waters_3.raw
High	A	2	VEILANDQGNR	5513	Unambiguous	Heat shock 70 kDa protein 6 OS=Homo sapiens OX=9606 GN=HSPA6 PE=1 SV=2 - [HSP76_HUMAN]|Putative heat shock 70 kDa protein 7 OS=Homo sapiens OX=9606 GN=HSPA7 PE=5 SV=2 - [HSP77_HUMAN]|Heat shock cognate 71 kDa protein OS=Homo sapiens OX=9606 GN=HSPA8 PE=1 SV=1 - [HSP7C_HUMAN]|Endoplasmic reticulum chaperone BiP OS=Homo sapiens OX=9606 GN=HSPA5 PE=1 SV=2 - [BIP_HUMAN]|Heat shock 70 kDa protein 1-li…	7	4	P48741;P11142;P11021;P0DMV8		HCD	1	0	1	2	0	2.07e-15	163	179	2.59	0	17	4	54500000	2	614.818	1228.63	0	0.3	28.04	8659	8659	MS2	0/0	0	0	hela_waters_3.raw
High	A	2	DINAYNcEEPTEK	5905	Unambiguous	Peroxiredoxin-6 OS=Homo sapiens OX=9606 GN=PRDX6 PE=1 SV=3 - [PRDX6_HUMAN]	1	1	P30041	C7(Carbamidomethyl)	HCD	1	0	1	1	0	1.18e-13	19	29	2.56	0	40	38	13420000	2	791.835	1582.66	0	-4.19	28.04	8660	8660	MS2	0/0	0	0	hela_waters_3.raw
Middle	A	2	SFYMQR	5909	Unambiguous	Asparagine--tRNA ligase, cytoplasmic OS=Homo sapiens OX=9606 GN=NARS PE=1 SV=1 - [SYNC_HUMAN]	1	1	O43776		HCD	1	0	1	1	0.037	0.493	42	34	1.36	0	71	19	5882000	2	416.195	831.383	0	1.41	28.04	8662	8662	MS2	0/0	0	0	hela_waters_3.raw
High	A	2	FEPYANPTK	5916	Unambiguous	Heterogeneous nuclear ribonucleoprotein M OS=Homo sapiens OX=9606 GN=HNRNPM PE=1 SV=3 - [HNRPM_HUMAN]	1	1	P52272		HCD	1	0	1	1	0	0.00142	153	179	1.28	0	50	5	21600000	2	533.763	1066.52	0	-2.05	28.05	8666	8666	MS2	0/0	0	0	hela_waters_3.raw
High	A	2	TANDMIHAENMR	5497	Unambiguous	Moesin OS=Homo sapiens OX=9606 GN=MSN PE=1 SV=3 - [MOES_HUMAN]	1	1	P26038		HCD	1	0	1	1	0.001	0.00671	60	64	1.77	0	56	22	7910000	3	468.211	1402.62	0	-0.46	28.05	8667	8667	MS2	0/0	0	0	hela_waters_3.raw
High	A	2	YDDMAAcMK	5920	Unambiguous	14-3-3 protein zeta/delta OS=Homo sapiens OX=9606 GN=YWHAZ PE=1 SV=1 - [1433Z_HUMAN]	1	1	P63104	C7(Carbamidomethyl)	HCD	1	0	1	1	0	8.24e-09	3	2	1.86	0	32	5	36200000	2	552.712	1104.42	0	0.46	28.06	8669	8669	MS2	0/0	0	0	hela_waters_3.raw
High	A	2	SHMMDVQGSTQDSAIK	5923	Unambiguous	Protein disulfide-isomerase A4 OS=Homo sapiens OX=9606 GN=PDIA4 PE=1 SV=2 - [PDIA4_HUMAN]	1	1	P13667		HCD	1	0	1	1	0	0.000271	78	74	1.55	0	35	57	4336000	2	867.893	1734.78	0	-0.01	28.06	8671	8671	MS2	0/0	0	0	hela_waters_3.raw
High	A	2	IQFKPDDGTTPER	5831	Unambiguous	Far upstream element-binding protein 1 OS=Homo sapiens OX=9606 GN=FUBP1 PE=1 SV=3 - [FUBP1_HUMAN]	1	1	Q96AE4		HCD	1	0	1	1	0	1.73e-06	177	195	1.95	0	10	48	6145000	2	752.374	1503.74	0	-1.66	28.06	8672	8672	MS2	0/0	0	0	hela_waters_3.raw
Middle	A	2	VVLIGGKPDR	5223	Unambiguous	Heterogeneous nuclear ribonucleoprotein K OS=Homo sapiens OX=9606 GN=HNRNPK PE=1 SV=1 - [HNRPK_HUMAN]	1	1	P61978		HCD	1	0	1	1	0.012	0.186	42	36	1.78	0	77	14	7208000	2	527.324	1053.64	0	-0.27	28.07	8674	8674	MS2	0/0	0	0	hela_waters_3.raw
High	A	2	VEDVVVSDEcR	5931	Unambiguous	Glucosamine 6-phosphate N-acetyltransferase OS=Homo sapiens OX=9606 GN=GNPNAT1 PE=1 SV=1 - [GNA1_HUMAN]	1	1	Q96EK6	C10(Carbamidomethyl)	HCD	1	0	1	1	0	2.61e-10	79	67	2.34	0	62	52	6271000	2	653.801	1306.6	0	0.92	28.07	8675	8675	MS2	0/0	0	0	hela_waters_3.raw
High	A	2	AGFAGDDAPR	3936	Unambiguous	Actin, alpha cardiac muscle 1 OS=Homo sapiens OX=9606 GN=ACTC1 PE=1 SV=1 - [ACTC_HUMAN]|Actin, cytoplasmic 1 OS=Homo sapiens OX=9606 GN=ACTB PE=1 SV=1 - [ACTB_HUMAN]	10	2	P68032;P60709		HCD	1	0	1	1	0	7.13e-06	81	92	1.75	0	55	3	26630000	2	488.729	976.45	0	1.87	28.08	8680	8680	MS2	0/0	0	0	hela_waters_3.raw
High	A	2	LYGSAGPPPTGEEDTAEK	5944	Unambiguous	Endoplasmic reticulum chaperone BiP OS=Homo sapiens OX=9606 GN=HSPA5 PE=1 SV=2 - [BIP_HUMAN]	1	1	P11021		HCD	1	0	1	1	0	2.36e-12	111	113	2.66	0	0	60	2187000	2	909.924	1818.84	0	0.26	28.08	8682	8682	MS2	0/0	0	0	hela_waters_3.raw
High	A	2	QTATQLLK	5946	Unambiguous	60S ribosomal protein L7a OS=Homo sapiens OX=9606 GN=RPL7A PE=1 SV=2 - [RL7A_HUMAN]	1	1	P62424		HCD	1	0	1	1	0.005	0.0557	173	179	2.05	0	61	3	28660000	2	451.769	902.531	0	0.65	28.09	8684	8684	MS2	0/0	0	0	hela_waters_3.raw
High	A	2	EDMAALEK	5139	Unambiguous	Tubulin alpha-1A chain OS=Homo sapiens OX=9606 GN=TUBA1A PE=1 SV=1 - [TBA1A_HUMAN]|Tubulin alpha-1B chain OS=Homo sapiens OX=9606 GN=TUBA1B PE=1 SV=1 - [TBA1B_HUMAN]|Tubulin alpha-1C chain OS=Homo sapiens OX=9606 GN=TUBA1C PE=1 SV=1 - [TBA1C_HUMAN]|Tubulin alpha-4A chain OS=Homo sapiens OX=9606 GN=TUBA4A PE=1 SV=1 - [TBA4A_HUMAN]	4	2	Q9BQE3;P68366		HCD	1	0	1	1	0	0.00371	89	92	1.65	0	36	7	15440000	2	453.716	906.425	0	1.19	28.09	8685	8685	MS2	0/0	0	0	hela_waters_3.raw
High	A	2	ASGNYATVISHNPETK	5952	Unambiguous	60S ribosomal protein L8 OS=Homo sapiens OX=9606 GN=RPL8 PE=1 SV=2 - [RL8_HUMAN]	1	1	P62917		HCD	1	0	1	1	0	8.36e-14	186	193	2.86	0	28	11	28510000	3	563.613	1688.83	0	0.94	28.09	8687	8687	MS2	0/0	0	0	hela_waters_3.raw
High	A	2	VTLTSEEEAR	4776	Unambiguous	L-lactate dehydrogenase A chain OS=Homo sapiens OX=9606 GN=LDHA PE=1 SV=2 - [LDHA_HUMAN]	1	1	P00338		HCD	1	0	1	1	0	2.84e-14	239	223	2.22	0	38	7	21570000	2	567.786	1134.56	0	0.65	28.09	8688	8688	MS2	0/0	0	0	hela_waters_3.raw
High	A	2	ELNITAAK	5958	Unambiguous	40S ribosomal protein S7 OS=Homo sapiens OX=9606 GN=RPS7 PE=1 SV=1 - [RS7_HUMAN]	1	1	P62081		HCD	1	0	1	1	0.002	0.0139	368	354	1.48	0	62	3	25490000	2	430.25	859.492	0	4.53	28.1	8690	8690	MS2	0/0	0	0	hela_waters_3.raw
Middle	A	2	LLHGGVAVSSR	5584	Unambiguous	Phosphatidylinositol 4-kinase beta OS=Homo sapiens OX=9606 GN=PI4KB PE=1 SV=1 - [PI4KB_HUMAN]	1	1	Q9UBF8		HCD	1	0	1	1	0.038	0.507	103	86	0.89	0	26	9	25570000	2	548.319	1095.63	0	4.04	28.1	8693	8693	MS2	0/0	0	0	hela_waters_3.raw
Middle	A	2	QMVETELK	5964	Unambiguous	14-3-3 protein epsilon OS=Homo sapiens OX=9606 GN=YWHAE PE=1 SV=1 - [1433E_HUMAN]	1	1	P62258		HCD	1	0	1	1	0.021	0.277	239	254	1.29	0	57	3	39030000	2	489.253	977.499	0	1.48	28.11	8695	8695	MS2	0/0	0	0	hela_waters_3.raw
High	A	2	FETLQAQAGK	5560	Unambiguous	Keratin, type II cytoskeletal 7 OS=Homo sapiens OX=9606 GN=KRT7 PE=1 SV=5 - [K2C7_HUMAN]	1	1	P08729		HCD	1	0	1	1	0	3.22e-08	235	224	1.75	0	28	7	27990000	2	546.788	1092.57	0	0.52	28.11	8696	8696	MS2	0/0	0	0	hela_waters_3.raw
High	A	2	FcLDNGAK	5577	Unambiguous	Phosphoglycerate kinase 1 OS=Homo sapiens OX=9606 GN=PGK1 PE=1 SV=3 - [PGK1_HUMAN]	1	1	P00558	C2(Carbamidomethyl)	HCD	1	0	1	1	0.001	0.0062	96	90	1.22	0	30	6	23530000	2	462.716	924.425	0	0.66	28.11	8697	8697	MS2	0/0	0	0	hela_waters_3.raw
High	A	2	ASGNYATVISHNPETK	5952	Unambiguous	60S ribosomal protein L8 OS=Homo sapiens OX=9606 GN=RPL8 PE=1 SV=2 - [RL8_HUMAN]	1	1	P62917		HCD	1	0	1	1	0	1.37e-14	182	190	2.78	0	6	29	26300000	2	844.916	1688.82	0	0.01	28.11	8698	8698	MS2	0/0	0	0	hela_waters_3.raw
High	A	2	EDMTYAVR	5974	Unambiguous	Serine/arginine-rich splicing factor 1 OS=Homo sapiens OX=9606 GN=SRSF1 PE=1 SV=2 - [SRSF1_HUMAN]	1	1	Q07955		HCD	1	0	1	1	0	1.11e-05	79	69	1.87	0	47	5	17410000	2	492.727	984.447	0	1.29	28.12	8700	8700	MS2	0/0	0	0	hela_waters_3.raw
High	A	2	LQQTYAALNSK	5976	Unambiguous	Ras GTPase-activating-like protein IQGAP1 OS=Homo sapiens OX=9606 GN=IQGAP1 PE=1 SV=1 - [IQGA1_HUMAN]	1	1	P46940		HCD	1	0	1	1	0	3.97e-08	198	184	1.64	0	42	11	11810000	2	618.833	1236.66	0	1.14	28.12	8701	8701	MS2	0/0	0	0	hela_waters_3.raw
High	A	2	MDSTANEVEAVK	5532	Unambiguous	Protein disulfide-isomerase OS=Homo sapiens OX=9606 GN=P4HB PE=1 SV=3 - [PDIA1_HUMAN]	1	1	P07237		HCD	1	0	1	1	0	7.84e-13	111	116	2.15	0	32	44	10170000	2	647.303	1293.6	0	-0.01	28.12	8704	8704	MS2	0/0	0	0	hela_waters_3.raw
High	A	2	SAITPGGLR	5984	Unambiguous	Serine hydroxymethyltransferase, mitochondrial OS=Homo sapiens OX=9606 GN=SHMT2 PE=1 SV=3 - [GLYM_HUMAN]	1	1	P34897		HCD	1	0	1	1	0	0.00549	133	147	2.03	0	48	17	11290000	2	436.254	871.5	0	0.19	28.13	8706	8706	MS2	0/0	0	0	hela_waters_3.raw
High	A	2	LLPHIR	5993	Unambiguous	60S acidic ribosomal protein P0 OS=Homo sapiens OX=9606 GN=RPLP0 PE=1 SV=1 - [RLA0_HUMAN]	1	1	P05388		HCD	1	0	1	1	0.005	0.0565	29	36	1.35	0	62	58	3009000	2	374.745	748.483	0	0.55	28.13	8710	8710	MS2	0/0	0	0	hela_waters_3.raw
High	A	2	LELQGPR	5995	Unambiguous	Nucleolin OS=Homo sapiens OX=9606 GN=NCL PE=1 SV=3 - [NUCL_HUMAN]	1	1	P19338		HCD	1	0	1	1	0.001	0.0115	90	96	1.6	0	11	5	42090000	2	406.735	812.463	0	0.44	28.14	8712	8712	MS2	0/0	0	0	hela_waters_3.raw
High	A	2	STAGDTHLGGEDFDNR	5595	Unambiguous	Heat shock cognate 71 kDa protein OS=Homo sapiens OX=9606 GN=HSPA8 PE=1 SV=1 - [HSP7C_HUMAN]	2	1	P11142		HCD	1	0	1	1	0	5.68e-11	38	35	2.87	0	41	34	19500000	2	846.367	1691.73	0	0.71	28.14	8713	8713	MS2	0/0	0	0	hela_waters_3.raw
High	A	2	IFAPNHVVAK	5583	Unambiguous	60S ribosomal protein L18a OS=Homo sapiens OX=9606 GN=RPL18A PE=1 SV=2 - [RL18A_HUMAN]	1	1	Q02543		HCD	1	0	1	1	0	0.00215	103	86	1.72	0	51	17	4805000	3	365.882	1095.63	0	0.47	28.15	8720	8720	MS2	0/0	0	0	hela_waters_3.raw
High	A	2	cQSWSSMTPHR	6012	Unambiguous	Plasminogen OS=Homo sapiens OX=9606 GN=PLG PE=1 SV=2 - [PLMN_HUMAN]	1	1	P00747	C1(Carbamidomethyl)	HCD	1	0	1	1	0.006	0.0704	24	31	1.19	0	66	19	5228000	3	459.533	1376.58	0	1.02	28.16	8721	8721	MS2	0/0	0	0	hela_waters_3.raw
High	A	2	EVATNSELVQSGK	4723	Unambiguous	Keratin, type I cytoskeletal 17 OS=Homo sapiens OX=9606 GN=KRT17 PE=1 SV=2 - [K1C17_HUMAN]	2	1	Q04695		HCD	1	0	1	1	0	8.14e-12	235	224	2.18	0	16	15	20190000	2	681.349	1361.69	0	-0.3	28.17	8725	8725	MS2	0/0	0	0	hela_waters_3.raw
High	A	2	DGQVINETSQHHDDLE	5617	Unambiguous	Vimentin OS=Homo sapiens OX=9606 GN=VIM PE=1 SV=4 - [VIME_HUMAN]	1	1	P08670		HCD	1	0	1	1	0	0.00165	77	54	2.28	0	8	55	6598000	2	918.904	1836.8	0	0.1	28.17	8726	8726	MS2	0/0	0	0	hela_waters_3.raw
High	A	2	LAPEYEAAATR	5621	Unambiguous	Protein disulfide-isomerase A3 OS=Homo sapiens OX=9606 GN=PDIA3 PE=1 SV=4 - [PDIA3_HUMAN]	1	1	P30101		HCD	1	0	1	1	0	8.82e-11	230	197	1.63	0	49	8	16320000	2	596.304	1191.6	0	1.05	28.17	8729	8729	MS2	0/0	0	0	hela_waters_3.raw
High	A	2	LMSNLDSNR	5042	Unambiguous	Protein S100-A4 OS=Homo sapiens OX=9606 GN=S100A4 PE=1 SV=1 - [S10A4_HUMAN]	1	1	P26447		HCD	1	0	1	1	0	4.75e-08	161	166	1.94	0	41	9	18200000	2	525.255	1049.5	0	-1.07	28.18	8730	8730	MS2	0/0	0	0	hela_waters_3.raw
High	A	2	IGAEVYHNLK	5629	Unambiguous	Alpha-enolase OS=Homo sapiens OX=9606 GN=ENO1 PE=1 SV=2 - [ENOA_HUMAN]	1	1	P06733		HCD	1	0	1	1	0	8.78e-07	200	209	1.86	0	20	4	61210000	2	572.311	1143.61	0	-1.02	28.18	8733	8733	MS2	0/0	0	0	hela_waters_3.raw
Middle	A	2	MQSFGMK	6034	Unambiguous	D-3-phosphoglycerate dehydrogenase OS=Homo sapiens OX=9606 GN=PHGDH PE=1 SV=4 - [SERA_HUMAN]	1	1	O43175		HCD	1	0	1	1	0.018	0.253	47	56	1.22	0	72	13	4385000	2	414.69	828.373	0	-1.32	28.19	8735	8735	MS2	0/0	0	0	hela_waters_3.raw
High	A	2	LPPNTNDEVDEDPTGNK	6036	Unambiguous	Splicing factor 3B subunit 3 OS=Homo sapiens OX=9606 GN=SF3B3 PE=1 SV=4 - [SF3B3_HUMAN]	1	1	Q15393		HCD	1	0	1	1	0	3.87e-08	84	81	1.52	0	17	60	2953000	2	927.921	1854.83	0	-0.74	28.19	8736	8736	MS2	0/0	0	0	hela_waters_3.raw
High	A	2	NSNPALNDNLEK	5641	Unambiguous	Chloride intracellular channel protein 1 OS=Homo sapiens OX=9606 GN=CLIC1 PE=1 SV=4 - [CLIC1_HUMAN]	1	1	O00299		HCD	1	0	1	1	0	1.85e-09	143	162	2.24	0	38	44	7622000	2	664.825	1328.64	0	-0.77	28.19	8738	8738	MS2	0/0	0	0	hela_waters_3.raw
High	A	2	SEPIPESNDGPVK	6044	Unambiguous	Protein disulfide-isomerase A3 OS=Homo sapiens OX=9606 GN=PDIA3 PE=1 SV=4 - [PDIA3_HUMAN]	1	1	P30101		HCD	1	0	1	1	0	5.63e-13	144	138	2.33	0	44	8	47130000	2	684.836	1368.66	0	-0.26	28.2	8741	8741	MS2	0/0	0	0	hela_waters_3.raw
High	A	2	SEMTPEELQK	6046	Unambiguous	Small nuclear ribonucleoprotein Sm D2 OS=Homo sapiens OX=9606 GN=SNRPD2 PE=1 SV=1 - [SMD2_HUMAN]	1	1	P62316		HCD	1	0	1	1	0	0.000598	109	119	1.3	0	57	7	16920000	2	596.283	1191.56	0	1.91	28.2	8742	8742	MS2	0/0	0	0	hela_waters_3.raw
High	A	2	GVDLQENNPASR	5205	Unambiguous	Ras-related protein Rab-5C OS=Homo sapiens OX=9606 GN=RAB5C PE=1 SV=2 - [RAB5C_HUMAN]	1	1	P51148		HCD	1	0	1	1	0.009	0.136	131	143	1.38	0	22	60	3502000	2	650.32	1299.63	0	3.57	28.2	8744	8744	MS2	0/0	0	0	hela_waters_3.raw
High	A	2	LSSEMNTSTVNSAR	4943	Unambiguous	Lamin-B1 OS=Homo sapiens OX=9606 GN=LMNB1 PE=1 SV=2 - [LMNB1_HUMAN]	1	1	P20700		HCD	1	0	1	1	0	3.7e-06	121	122	1.82	0	77	56	1634000	2	748.853	1496.7	0	-1.41	28.21	8749	8749	MS2	0/0	0	0	hela_waters_3.raw
High	A	2	EAVAMESYAK	6064	Unambiguous	T-complex protein 1 subunit beta OS=Homo sapiens OX=9606 GN=CCT2 PE=1 SV=4 - [TCPB_HUMAN]	1	1	P78371		HCD	1	0	1	1	0	1.24e-06	102	100	2.12	0	69	12	8194000	2	549.761	1098.52	0	1.52	28.22	8752	8752	MS2	0/0	0	0	hela_waters_3.raw
High	A	2	IGAEVYHNLK	5629	Unambiguous	Alpha-enolase OS=Homo sapiens OX=9606 GN=ENO1 PE=1 SV=2 - [ENOA_HUMAN]	1	1	P06733		HCD	1	0	1	1	0	2.68e-07	236	240	2.16	0	28	8	21480000	3	381.877	1143.62	0	0.03	28.23	8756	8756	MS2	0/0	0	0	hela_waters_3.raw
High	A	2	HPGSFDVVHVK	6074	Unambiguous	40S ribosomal protein S4, X isoform OS=Homo sapiens OX=9606 GN=RPS4X PE=1 SV=2 - [RS4X_HUMAN]	2	1	P62701		HCD	1	0	1	1	0.002	0.0141	204	189	1.77	0	8	9	24930000	3	407.884	1221.64	0	0.31	28.24	8760	8760	MS2	0/0	0	0	hela_waters_3.raw
High	A	2	KLDEAVAEAHLGK	3737	Unambiguous	Adenosylhomocysteinase OS=Homo sapiens OX=9606 GN=AHCY PE=1 SV=4 - [SAHH_HUMAN]	1	1	P23526		HCD	1	0	1	1	0	0.00255	160	171	2.25	1	10	9	22740000	3	460.921	1380.75	0	0.6	28.24	8761	8761	MS2	0/0	0	0	hela_waters_3.raw
Middle	A	2	KLEMDLK	6078	Unambiguous	Myosin-9 OS=Homo sapiens OX=9606 GN=MYH9 PE=1 SV=4 - [MYH9_HUMAN]	1	1	P35579		HCD	1	0	1	1	0.02	0.265	240	245	2.02	1	43	19	6621000	2	438.747	876.487	0	0.67	28.24	8762	8762	MS2	0/0	0	0	hela_waters_3.raw
High	A	2	GNLGAGNGNLQGPR	4786	Unambiguous	Matrin-3 OS=Homo sapiens OX=9606 GN=MATR3 PE=1 SV=2 - [MATR3_HUMAN]	1	1	P43243		HCD	1	0	1	1	0.009	0.127	181	177	1.46	0	41	51	8011000	2	662.834	1324.66	-0.01	-7.86	28.24	8763	8763	MS2	0/0	0	0	hela_waters_3.raw
Middle	A	2	VILHLK	6082	Unambiguous	Heat shock protein HSP 90-beta OS=Homo sapiens OX=9606 GN=HSP90AB1 PE=1 SV=4 - [HS90B_HUMAN]|Heat shock protein HSP 90-alpha OS=Homo sapiens OX=9606 GN=HSP90AA1 PE=1 SV=5 - [HS90A_HUMAN]|Putative heat shock protein HSP 90-beta 4 OS=Homo sapiens OX=9606 GN=HSP90AB4P PE=5 SV=1 - [H90B4_HUMAN]	5	2	P08238;P07900		HCD	1	0	1	1	0.046	0.643	3	2	1.24	0	59	60	3417000	2	361.75	722.492	0	0.18	28.25	8764	8764	MS2	0/0	0	0	hela_waters_3.raw
Middle	A	2	IMESFK	6084	Unambiguous	Sodium/potassium-transporting ATPase subunit alpha-1 OS=Homo sapiens OX=9606 GN=ATP1A1 PE=1 SV=1 - [AT1A1_HUMAN]	3	1	P05023		HCD	1	0	1	1	0.023	0.316	81	81	0.75	0	76	60	1686000	2	377.693	754.38	0	-0.99	28.25	8765	8765	MS2	0/0	0	0	hela_waters_3.raw
High	A	2	EIAQDFK	4848	Unambiguous	Histone H3.1 OS=Homo sapiens OX=9606 GN=HIST1H3A PE=1 SV=2 - [H31_HUMAN]	4	1	P68431		HCD	1	0	1	1	0.002	0.0154	134	162	1.6	0	35	7	22260000	2	425.719	850.431	0	0.33	28.26	8768	8768	MS2	0/0	0	0	hela_waters_3.raw
High	A	2	AAAAAWEEPSSGNGTAR	6090	Unambiguous	Protein RCC2 OS=Homo sapiens OX=9606 GN=RCC2 PE=1 SV=2 - [RCC2_HUMAN]	1	1	Q9P258		HCD	1	0	1	1	0	4.21e-16	110	101	2.56	0	31	51	4871000	2	823.382	1645.76	0	-0.34	28.26	8769	8769	MS2	0/0	0	0	hela_waters_3.raw
High	A	2	VGVNGFGR	6094	Unambiguous	Glyceraldehyde-3-phosphate dehydrogenase OS=Homo sapiens OX=9606 GN=GAPDH PE=1 SV=3 - [G3P_HUMAN]	1	1	P04406		HCD	1	0	1	1	0.001	0.00875	259	245	1.63	0	47	3	46540000	2	403.219	805.431	0	-0.6	28.26	8771	8771	MS2	0/0	0	0	hela_waters_3.raw
High	A	2	TADGIVSHLK	6096	Unambiguous	Protein disulfide-isomerase A3 OS=Homo sapiens OX=9606 GN=PDIA3 PE=1 SV=4 - [PDIA3_HUMAN]	1	1	P30101		HCD	1	0	1	1	0	0.00251	104	99	1.79	0	34	5	30380000	2	520.791	1040.57	0	0.59	28.26	8772	8772	MS2	0/0	0	0	hela_waters_3.raw
High	A	2	LNLVQR	5696	Unambiguous	L-lactate dehydrogenase B chain OS=Homo sapiens OX=9606 GN=LDHB PE=1 SV=2 - [LDHB_HUMAN]|L-lactate dehydrogenase A chain OS=Homo sapiens OX=9606 GN=LDHA PE=1 SV=2 - [LDHA_HUMAN]	3	2	P07195;P00338		HCD	1	0	1	1	0.009	0.115	86	85	1.85	0	24	11	28320000	2	371.732	742.457	0	0.15	28.27	8775	8775	MS2	0/0	0	0	hela_waters_3.raw
High	A	2	SNVSDAVAQSTR	4662	Unambiguous	Triosephosphate isomerase OS=Homo sapiens OX=9606 GN=TPI1 PE=1 SV=3 - [TPIS_HUMAN]	1	1	P60174		HCD	1	0	1	1	0	1.48e-08	183	189	2.27	0	52	17	7226000	2	617.807	1234.61	0	3.42	28.27	8776	8776	MS2	0/0	0	0	hela_waters_3.raw
High	A	2	FPLPHR	6104	Unambiguous	60S ribosomal protein L18a OS=Homo sapiens OX=9606 GN=RPL18A PE=1 SV=2 - [RL18A_HUMAN]	1	1	Q02543		HCD	1	0	1	1	0.003	0.0352	70	74	1.66	0	48	16	9029000	2	383.722	766.436	0	0.16	28.28	8778	8778	MS2	0/0	0	0	hela_waters_3.raw
Middle	A	2	MPSGEFAR	5072	Unambiguous	Proliferating cell nuclear antigen OS=Homo sapiens OX=9606 GN=PCNA PE=1 SV=1 - [PCNA_HUMAN]	1	1	P12004		HCD	1	0	1	1	0.013	0.195	107	96	1.19	0	65	16	4551000	2	447.711	894.415	0	1.22	28.28	8779	8779	MS2	0/0	0	0	hela_waters_3.raw
High	A	2	QEYDESGPSIVHR	5305	Unambiguous	Actin, cytoplasmic 1 OS=Homo sapiens OX=9606 GN=ACTB PE=1 SV=1 - [ACTB_HUMAN]	7	1	P60709		HCD	1	0	1	1	0	1.52e-13	92	105	2.71	0	7	4	68760000	3	506.239	1516.7	0	0.52	28.29	8784	8784	MS2	0/0	0	0	hela_waters_3.raw
High	A	2	VcNPIITK	6120	Unambiguous	Heat shock cognate 71 kDa protein OS=Homo sapiens OX=9606 GN=HSPA8 PE=1 SV=1 - [HSP7C_HUMAN]	1	1	P11142	C2(Carbamidomethyl)	HCD	1	0	1	1	0	0.00322	208	198	1.41	0	50	5	11220000	2	472.767	944.528	0	4.35	28.29	8786	8786	MS2	0/0	0	0	hela_waters_3.raw
High	A	2	LVAGEMGQNEPDQGGQR	3416	Unambiguous	3-hydroxyacyl-CoA dehydrogenase type-2 OS=Homo sapiens OX=9606 GN=HSD17B10 PE=1 SV=3 - [HCD2_HUMAN]	1	1	Q99714		HCD	1	0	1	1	0.003	0.0356	95	106	1.36	0	0	60	2272000	2	893.412	1785.82	0	-1.44	28.29	8787	8787	MS2	0/0	0	0	hela_waters_3.raw
High	A	2	QSVENDIHGLR	6124	Unambiguous	Keratin, type I cytoskeletal 18 OS=Homo sapiens OX=9606 GN=KRT18 PE=1 SV=2 - [K1C18_HUMAN]	1	1	P05783		HCD	1	0	1	1	0	4.21e-16	169	179	2.83	0	16	15	18160000	2	634.322	1267.64	0	-2.24	28.3	8789	8789	MS2	0/0	0	0	hela_waters_3.raw
High	A	2	QSVENDIHGLR	6124	Unambiguous	Keratin, type I cytoskeletal 18 OS=Homo sapiens OX=9606 GN=KRT18 PE=1 SV=2 - [K1C18_HUMAN]	1	1	P05783		HCD	1	0	1	1	0	8.41e-11	186	196	2.25	0	56	6	11840000	3	423.218	1267.64	0	0.26	28.3	8790	8790	MS2	0/0	0	0	hela_waters_3.raw
High	A	2	EGALcEENMR	4695	Unambiguous	Elongation factor 2 OS=Homo sapiens OX=9606 GN=EEF2 PE=1 SV=4 - [EF2_HUMAN]	1	1	P13639	C5(Carbamidomethyl)	HCD	1	0	1	1	0	4.81e-07	21	22	2.66	0	57	60	4843000	2	604.755	1208.5	0	-1.04	28.3	8791	8791	MS2	0/0	0	0	hela_waters_3.raw
High	A	2	YRPGTVALR	4410	Unambiguous	Histone H3.1 OS=Homo sapiens OX=9606 GN=HIST1H3A PE=1 SV=2 - [H31_HUMAN]	5	1	P68431		HCD	1	0	1	1	0.002	0.0133	150	159	1.96	0	24	3	55530000	2	516.801	1032.6	0	0.68	28.31	8794	8794	MS2	0/0	0	0	hela_waters_3.raw
High	A	2	NISHDTFGTTYGR	6139	Unambiguous	Ribosome production factor 2 homolog OS=Homo sapiens OX=9606 GN=RPF2 PE=1 SV=2 - [RPF2_HUMAN]	1	1	Q9H7B2		HCD	1	0	1	1	0	0.00492	116	129	1.9	0	27	56	3311000	2	734.848	1468.69	0	4.24	28.32	8797	8797	MS2	0/0	0	0	hela_waters_3.raw
High	A	2	HIYYITGETK	6149	Unambiguous	Heat shock protein HSP 90-alpha OS=Homo sapiens OX=9606 GN=HSP90AA1 PE=1 SV=5 - [HS90A_HUMAN]	2	1	P07900		HCD	1	0	1	1	0	4.98e-07	180	171	2.37	0	32	3	56900000	2	612.818	1224.63	0	2.47	28.33	8804	8804	MS2	0/0	0	0	hela_waters_3.raw
High	A	2	DHAVVVGVYRPPPK	6157	Unambiguous	rRNA 2'-O-methyltransferase fibrillarin OS=Homo sapiens OX=9606 GN=FBL PE=1 SV=2 - [FBRL_HUMAN]	1	1	P22087		HCD	1	0	1	1	0	2.97e-07	128	133	2.45	0	49	16	10200000	3	511.956	1533.85	0	0.48	28.35	8809	8809	MS2	0/0	0	0	hela_waters_3.raw
High	A	2	TSLGPNGLDK	6161	Unambiguous	T-complex protein 1 subunit epsilon OS=Homo sapiens OX=9606 GN=CCT5 PE=1 SV=1 - [TCPE_HUMAN]	1	1	P48643		HCD	1	0	1	1	0.007	0.0848	243	249	1.19	0	59	7	11470000	2	501.268	1001.53	0	3.21	28.35	8811	8811	MS2	0/0	0	0	hela_waters_3.raw
High	A	2	ADGYVLEGK	5767	Unambiguous	40S ribosomal protein S8 OS=Homo sapiens OX=9606 GN=RPS8 PE=1 SV=2 - [RS8_HUMAN]	1	1	P62241		HCD	1	0	1	1	0.001	0.00583	146	145	1.32	0	30	13	9506000	2	476.243	951.478	0	0.03	28.37	8819	8819	MS2	0/0	0	0	hela_waters_3.raw
High	A	2	DVMPEVNK	6175	Unambiguous	Glucose-6-phosphate isomerase OS=Homo sapiens OX=9606 GN=GPI PE=1 SV=4 - [G6PI_HUMAN]	1	1	P06744		HCD	1	0	1	1	0.001	0.013	132	120	1.66	0	65	11	6509000	2	466.231	931.455	0	-0.49	28.37	8820	8820	MS2	0/0	0	0	hela_waters_3.raw
High	A	2	FETEQALR	6177	Unambiguous	Keratin, type I cytoskeletal 17 OS=Homo sapiens OX=9606 GN=KRT17 PE=1 SV=2 - [K1C17_HUMAN]|Keratin, type I cytoskeletal 19 OS=Homo sapiens OX=9606 GN=KRT19 PE=1 SV=4 - [K1C19_HUMAN]	2	2	Q04695;P08727		HCD	1	0	1	1	0	0.000106	216	198	1.79	0	30	4	48200000	2	497.254	993.5	0	0.45	28.37	8821	8821	MS2	0/0	0	0	hela_waters_3.raw
High	A	2	VVGDVAYDEAK	5781	Unambiguous	C-1-tetrahydrofolate synthase, cytoplasmic OS=Homo sapiens OX=9606 GN=MTHFD1 PE=1 SV=3 - [C1TC_HUMAN]	1	1	P11586		HCD	1	0	1	1	0	0.00334	183	188	1.45	0	62	51	8474000	2	583.292	1165.58	0	1.83	28.38	8823	8823	MS2	0/0	0	0	hela_waters_3.raw
High	A	2	AIPNNQVLGK	6187	Unambiguous	Endothelial differentiation-related factor 1 OS=Homo sapiens OX=9606 GN=EDF1 PE=1 SV=1 - [EDF1_HUMAN]	1	1	O60869		HCD	1	0	1	1	0	0.00321	94	105	1.06	0	65	14	9243000	2	527.307	1053.61	0	0.79	28.38	8826	8826	MS2	0/0	0	0	hela_waters_3.raw
High	A	2	IIAPPER	4449	Unambiguous	Actin, alpha cardiac muscle 1 OS=Homo sapiens OX=9606 GN=ACTC1 PE=1 SV=1 - [ACTC_HUMAN]|Beta-actin-like protein 2 OS=Homo sapiens OX=9606 GN=ACTBL2 PE=1 SV=2 - [ACTBL_HUMAN]|Actin, cytoplasmic 1 OS=Homo sapiens OX=9606 GN=ACTB PE=1 SV=1 - [ACTB_HUMAN]	7	3	P68032;Q562R1;P60709		HCD	1	0	1	1	0.008	0.0969	61	60	1.69	0	25	11	18000000	2	398.24	795.472	0	0.12	28.39	8829	8829	MS2	0/0	0	0	hela_waters_3.raw
High	A	2	DLEGSDIDTR	6193	Unambiguous	Exportin-2 OS=Homo sapiens OX=9606 GN=CSE1L PE=1 SV=3 - [XPO2_HUMAN]	1	1	P55060		HCD	1	0	1	1	0.001	0.00596	88	111	1.62	0	67	15	4572000	2	560.762	1120.52	0	4.93	28.39	8830	8830	MS2	0/0	0	0	hela_waters_3.raw
High	A	2	SIGTANRPMGAGEALR	6197	Unambiguous	Interleukin enhancer-binding factor 3 OS=Homo sapiens OX=9606 GN=ILF3 PE=1 SV=3 - [ILF3_HUMAN]	1	1	Q12906		HCD	1	0	1	1	0	0.00535	196	203	2.34	0	28	47	6681000	2	800.916	1600.82	0	1.26	28.39	8832	8832	MS2	0/0	0	0	hela_waters_3.raw
High	A	2	VEPHATIAEIK	6199	Unambiguous	Very-long-chain enoyl-CoA reductase OS=Homo sapiens OX=9606 GN=TECR PE=1 SV=1 - [TECR_HUMAN]	1	1	Q9NZ01		HCD	1	0	1	1	0.007	0.0843	160	167	1.4	0	53	60	5880000	2	604.338	1207.67	0	0.98	28.39	8833	8833	MS2	0/0	0	0	hela_waters_3.raw
Middle	A	2	EISYLK	6201	Unambiguous	Poly [ADP-ribose] polymerase 1 OS=Homo sapiens OX=9606 GN=PARP1 PE=1 SV=4 - [PARP1_HUMAN]	1	1	P09874		HCD	1	0	1	1	0.039	0.531	79	75	1.21	0	61	60	2368000	2	376.713	752.418	0	-0.53	28.4	8834	8834	MS2	0/0	0	0	hela_waters_3.raw
High	A	2	VIGSGcNLDSAR	4978	Unambiguous	L-lactate dehydrogenase B chain OS=Homo sapiens OX=9606 GN=LDHB PE=1 SV=2 - [LDHB_HUMAN]|L-lactate dehydrogenase A chain OS=Homo sapiens OX=9606 GN=LDHA PE=1 SV=2 - [LDHA_HUMAN]	4	2	P07195;P00338	C6(Carbamidomethyl)	HCD	1	0	1	1	0	4.74e-13	143	112	2.07	0	9	4	44440000	2	624.803	1248.6	0	-1.2	28.4	8837	8837	MS2	0/0	0	0	hela_waters_3.raw
High	A	2	QAGPASVPLR	6209	Unambiguous	Protein disulfide-isomerase A3 OS=Homo sapiens OX=9606 GN=PDIA3 PE=1 SV=4 - [PDIA3_HUMAN]	1	1	P30101		HCD	1	0	1	1	0	1.86e-12	90	83	2.31	0	55	4	22140000	2	498.285	995.563	0	-0.64	28.41	8839	8839	MS2	0/0	0	0	hela_waters_3.raw
High	A	2	EDLQELNDR	6211	Unambiguous	Prelamin-A/C OS=Homo sapiens OX=9606 GN=LMNA PE=1 SV=1 - [LMNA_HUMAN]	1	1	P02545		HCD	1	0	1	1	0	3.91e-08	79	87	2.27	0	42	12	19320000	2	566.267	1131.53	0	-1.36	28.41	8840	8840	MS2	0/0	0	0	hela_waters_3.raw
High	A	2	NMGLYGER	6213	Unambiguous	Aspartate aminotransferase, mitochondrial OS=Homo sapiens OX=9606 GN=GOT2 PE=1 SV=3 - [AATM_HUMAN]	1	1	P00505		HCD	1	0	1	1	0	0.00242	90	94	1.74	0	63	10	10410000	2	470.222	939.436	0	1.14	28.41	8841	8841	MS2	0/0	0	0	hela_waters_3.raw
Middle	A	2	mIEESLK	6215	Rejected	Oral-facial-digital syndrome 1 protein OS=Homo sapiens OX=9606 GN=OFD1 PE=1 SV=1 - [OFD1_HUMAN]	1	1	O75665	M1(Oxidation)	HCD	0	0	1	1	0.031	0.401	201	209	1.31	0	59	25	3294000	2	433.223	865.439	0	5.98	28.42	8843	8843	MS2	0/0	0	0	hela_waters_3.raw
Middle	A	2	FLEEATR	6216	Selected	Carbamoyl-phosphate synthase [ammonia], mitochondrial OS=Homo sapiens OX=9606 GN=CPS1 PE=1 SV=2 - [CPSM_HUMAN]	1	1	P31327		HCD		0	2	2	0.022	0.296	201	209	1.31	0	59	25	3294000	2	433.223	865.439	0	-3.1	28.42	8843	8843	MS2	0/0	0	0	hela_waters_3.raw
High	A	2	SQDIYLR	6220	Unambiguous	60S ribosomal protein L18 OS=Homo sapiens OX=9606 GN=RPL18 PE=1 SV=2 - [RL18_HUMAN]	1	1	Q07020		HCD	1	0	1	1	0.004	0.047	150	155	1.27	0	53	11	7050000	2	447.738	894.468	0	0.23	28.42	8846	8846	MS2	0/0	0	0	hela_waters_3.raw
High	A	2	LSVDYGK	4963	Unambiguous	Tubulin alpha-1A chain OS=Homo sapiens OX=9606 GN=TUBA1A PE=1 SV=1 - [TBA1A_HUMAN]|Tubulin alpha-1B chain OS=Homo sapiens OX=9606 GN=TUBA1B PE=1 SV=1 - [TBA1B_HUMAN]|Tubulin alpha-1C chain OS=Homo sapiens OX=9606 GN=TUBA1C PE=1 SV=1 - [TBA1C_HUMAN]|Tubulin alpha-4A chain OS=Homo sapiens OX=9606 GN=TUBA4A PE=1 SV=1 - [TBA4A_HUMAN]	5	2	Q9BQE3;P68366		HCD	1	0	1	1	0.004	0.0503	132	140	1.46	0	52	40	7553000	2	391.209	781.41	0	0.82	28.42	8847	8847	MS2	0/0	0	0	hela_waters_3.raw
High	A	2	HGESAWNLENR	6224	Unambiguous	Phosphoglycerate mutase 1 OS=Homo sapiens OX=9606 GN=PGAM1 PE=1 SV=2 - [PGAM1_HUMAN]	1	1	P18669		HCD	1	0	1	1	0	4.21e-16	104	84	2.83	0	56	60	5311000	2	656.805	1312.6	0	0.01	28.43	8848	8848	MS2	0/0	0	0	hela_waters_3.raw
High	A	2	AYTNFDAER	5820	Unambiguous	Annexin A2 OS=Homo sapiens OX=9606 GN=ANXA2 PE=1 SV=2 - [ANXA2_HUMAN]	2	1	P07355		HCD	1	0	1	1	0	6.8e-05	50	53	1.78	0	48	7	20710000	2	543.746	1086.48	0	-0.18	28.43	8850	8850	MS2	0/0	0	0	hela_waters_3.raw
High	A	2	QLSSGVSEIR	6228	Unambiguous	Heat shock protein beta-1 OS=Homo sapiens OX=9606 GN=HSPB1 PE=1 SV=2 - [HSPB1_HUMAN]	1	1	P04792		HCD	1	0	1	1	0.001	0.00659	243	257	1.81	0	41	8	12890000	2	538.292	1075.58	0	2.84	28.43	8851	8851	MS2	0/0	0	0	hela_waters_3.raw
High	A	2	VMEYINR	6230	Unambiguous	Clathrin heavy chain 1 OS=Homo sapiens OX=9606 GN=CLTC PE=1 SV=5 - [CLH1_HUMAN]	1	1	Q00610		HCD	1	0	1	1	0.002	0.0136	135	126	1.32	0	67	6	10910000	2	462.735	924.462	0	1.72	28.44	8852	8852	MS2	0/0	0	0	hela_waters_3.raw
High	A	2	VDNDENEHQLSLR	4995	Unambiguous	Nucleophosmin OS=Homo sapiens OX=9606 GN=NPM1 PE=1 SV=2 - [NPM_HUMAN]	1	1	P06748		HCD	1	0	1	1	0	4.21e-16	145	113	3.02	0	13	42	11440000	2	784.87	1568.73	0	1.34	28.44	8853	8853	MS2	0/0	0	0	hela_waters_3.raw
Middle	A	2	KVESTGAVPEFK	6234	Unambiguous	Hydroxysteroid dehydrogenase-like protein 2 OS=Homo sapiens OX=9606 GN=HSDL2 PE=1 SV=1 - [HSDL2_HUMAN]	1	1	Q6YN16		HCD	1	0	1	1	0.037	0.488	223	215	2.08	1	25	55	5962000	2	646.351	1291.7	0	4.68	28.44	8854	8854	MS2	0/0	0	0	hela_waters_3.raw
High	A	2	ADEASELAcPTPK	6236	Unambiguous	Fatty acid synthase OS=Homo sapiens OX=9606 GN=FASN PE=1 SV=3 - [FAS_HUMAN]	1	1	P49327	C9(Carbamidomethyl)	HCD	1	0	1	1	0	2.23e-13	63	69	2.52	0	48	58	3738000	2	694.82	1388.63	0	-2.83	28.44	8855	8855	MS2	0/0	0	0	hela_waters_3.raw
Middle	A	2	LASYLDR	6238	Unambiguous	Keratin, type I cytoskeletal 18 OS=Homo sapiens OX=9606 GN=KRT18 PE=1 SV=2 - [K1C18_HUMAN]	1	1	P05783		HCD	1	0	1	1	0.048	0.662	139	146	1.78	0	54	13	8481000	2	419.228	837.449	0	2.4	28.44	8856	8856	MS2	0/0	0	0	hela_waters_3.raw
High	A	2	IQETQAELPR	6240	Unambiguous	DNA replication licensing factor MCM6 OS=Homo sapiens OX=9606 GN=MCM6 PE=1 SV=1 - [MCM6_HUMAN]	1	1	Q14566		HCD	1	0	1	1	0	3e-06	151	156	2.25	0	67	60	6493000	2	592.816	1184.62	0	-1.98	28.44	8857	8857	MS2	0/0	0	0	hela_waters_3.raw
High	A	2	QEYDESGPSIVHR	5305	Unambiguous	Actin, cytoplasmic 1 OS=Homo sapiens OX=9606 GN=ACTB PE=1 SV=1 - [ACTB_HUMAN]	7	1	P60709		HCD	1	0	1	1	0	4.21e-16	90	103	2.91	0	11	10	33710000	2	758.856	1516.7	0	1.03	28.46	8863	8863	MS2	0/0	0	0	hela_waters_3.raw
High	A	2	MVQFEENGR	6250	Unambiguous	T-complex protein 1 subunit gamma OS=Homo sapiens OX=9606 GN=CCT3 PE=1 SV=4 - [TCPG_HUMAN]	1	1	P49368		HCD	1	0	1	1	0	0.000706	104	95	1.49	0	65	17	6310000	2	555.257	1109.51	0	2.17	28.46	8864	8864	MS2	0/0	0	0	hela_waters_3.raw
High	A	2	GHNQPcLLVGSGR	6252	Unambiguous	CAD protein OS=Homo sapiens OX=9606 GN=CAD PE=1 SV=3 - [PYR1_HUMAN]	1	1	P27708	C6(Carbamidomethyl)	HCD	1	0	1	1	0	7.97e-05	188	191	1.87	0	52	59	2329000	2	697.85	1394.69	0	-2.68	28.46	8865	8865	MS2	0/0	0	0	hela_waters_3.raw
High	A	2	NNTQVLINcR	6254	Unambiguous	Small nuclear ribonucleoprotein Sm D2 OS=Homo sapiens OX=9606 GN=SNRPD2 PE=1 SV=1 - [SMD2_HUMAN]	1	1	P62316	C9(Carbamidomethyl)	HCD	1	0	1	1	0	6.19e-10	214	203	2.47	0	40	8	26300000	2	616.314	1231.62	0	-0.96	28.46	8866	8866	MS2	0/0	0	0	hela_waters_3.raw
High	A	2	ScVEEPEPEPEAAEGDGDK	5804	Unambiguous	Hepatoma-derived growth factor OS=Homo sapiens OX=9606 GN=HDGF PE=1 SV=1 - [HDGF_HUMAN]	1	1	P51858	C2(Carbamidomethyl)	HCD	1	0	1	1	0	0.000871	15	14	1.83	0	12	60	1703000	2	1022.92	2044.82	0	-2.27	28.47	8869	8869	MS2	0/0	0	0	hela_waters_3.raw
High	A	2	ILGPQGNTIK	6263	Unambiguous	KH domain-containing, RNA-binding, signal transduction-associated protein 1 OS=Homo sapiens OX=9606 GN=KHDRBS1 PE=1 SV=1 - [KHDR1_HUMAN]	1	1	Q07666		HCD	1	0	1	1	0.003	0.0421	85	86	1.31	0	59	5	14140000	2	520.809	1040.61	0	1.16	28.47	8871	8871	MS2	0/0	0	0	hela_waters_3.raw
High	A	2	ELSEALTR	6267	Unambiguous	Glycine--tRNA ligase OS=Homo sapiens OX=9606 GN=GARS PE=1 SV=3 - [GARS_HUMAN]	1	1	P41250		HCD	1	0	1	1	0	0.00241	243	235	1.83	0	59	8	7819000	2	459.748	918.489	0	0.32	28.48	8874	8874	MS2	0/0	0	0	hela_waters_3.raw
Middle	A	2	AFFAGSQR	6269	Unambiguous	Neutral alpha-glucosidase AB OS=Homo sapiens OX=9606 GN=GANAB PE=1 SV=3 - [GANAB_HUMAN]	1	1	Q14697		HCD	1	0	1	1	0.035	0.458	105	100	0.91	0	74	11	4258000	2	442.224	883.442	0	-0.69	28.48	8875	8875	MS2	0/0	0	0	hela_waters_3.raw
High	A	2	VDNDENEHQLSLR	4995	Unambiguous	Nucleophosmin OS=Homo sapiens OX=9606 GN=NPM1 PE=1 SV=2 - [NPM_HUMAN]	1	1	P06748		HCD	1	0	1	1	0.002	0.0171	146	115	1.78	0	32	11	21360000	3	523.582	1568.73	0	0.98	28.48	8876	8876	MS2	0/0	0	0	hela_waters_3.raw
High	A	2	FEHcNFNDVTTR	6273	Unambiguous	CD59 glycoprotein OS=Homo sapiens OX=9606 GN=CD59 PE=1 SV=1 - [CD59_HUMAN]	1	1	P13987	C4(Carbamidomethyl)	HCD	1	0	1	1	0	6.42e-16	37	46	3.15	0	11	46	8726000	2	770.336	1539.66	0	0.19	28.48	8877	8877	MS2	0/0	0	0	hela_waters_3.raw
High	A	2	ASLENSLR	5854	Selected	Keratin, type I cytoskeletal 18 OS=Homo sapiens OX=9606 GN=KRT18 PE=1 SV=2 - [K1C18_HUMAN]	1	1	P05783		HCD	0.0349	0	1	1	0	0.000392	247	275	1.72	0	50	11	6798000	2	445.241	889.475	0	1.5	28.49	8878	8878	MS2	0/0	0	0	hela_waters_3.raw
Middle	A	2	ASLTGTPSR	6276	Rejected	Uncharacterized protein DKFZp434B061 OS=Homo sapiens OX=9606 PE=2 SV=2 - [YM012_HUMAN]	1	0			HCD		0.0349	2	2	0.027	0.36	247	275	1.66	0	50	11	6798000	2	445.241	889.475	0	1.5	28.49	8878	8878	MS2	0/0	0	0	hela_waters_3.raw
High	A	2	NFSDNQLQEGK	5097	Unambiguous	Transgelin-2 OS=Homo sapiens OX=9606 GN=TAGLN2 PE=1 SV=3 - [TAGL2_HUMAN]	1	1	P37802		HCD	1	0	1	1	0	0.00107	96	98	1.55	0	32	56	5068000	2	640.299	1279.59	0	-1.25	28.5	8884	8884	MS2	0/0	0	0	hela_waters_3.raw
High	A	2	AQNTWGcGNSLR	6290	Unambiguous	Prelamin-A/C OS=Homo sapiens OX=9606 GN=LMNA PE=1 SV=1 - [LMNA_HUMAN]	1	1	P02545	C7(Carbamidomethyl)	HCD	1	0	1	1	0	4.2e-12	88	82	2.27	0	44	40	13000000	2	682.313	1363.62	0	0.73	28.51	8887	8887	MS2	0/0	0	0	hela_waters_3.raw
High	A	2	QADVNLVNAK	5860	Unambiguous	D-3-phosphoglycerate dehydrogenase OS=Homo sapiens OX=9606 GN=PHGDH PE=1 SV=4 - [SERA_HUMAN]	1	1	O43175		HCD	1	0	1	1	0.002	0.0131	187	186	2.42	0	45	23	12000000	2	536.295	1071.58	0	3.23	28.52	8893	8893	MS2	0/0	0	0	hela_waters_3.raw
High	A	2	EEGETADTVGccSLR	6301	Unambiguous	DNA topoisomerase 1 OS=Homo sapiens OX=9606 GN=TOP1 PE=1 SV=2 - [TOP1_HUMAN]	1	1	P11387	C11(Carbamidomethyl); C12(Carbamidomethyl)	HCD	1	0	1	1	0	1.25e-12	26	26	2.46	0	46	56	4125000	2	842.352	1683.7	0	1.47	28.53	8894	8894	MS2	0/0	0	0	hela_waters_3.raw
High	A	2	HGESAWNLENR	6224	Unambiguous	Phosphoglycerate mutase 1 OS=Homo sapiens OX=9606 GN=PGAM1 PE=1 SV=2 - [PGAM1_HUMAN]	1	1	P18669		HCD	1	0	1	1	0.001	0.013	104	84	2.2	0	48	35	5800000	3	438.206	1312.6	0	0.02	28.53	8895	8895	MS2	0/0	0	0	hela_waters_3.raw
High	A	2	HQGVMVGMGQK	2468	Unambiguous	Actin, alpha cardiac muscle 1 OS=Homo sapiens OX=9606 GN=ACTC1 PE=1 SV=1 - [ACTC_HUMAN]|Beta-actin-like protein 2 OS=Homo sapiens OX=9606 GN=ACTBL2 PE=1 SV=2 - [ACTBL_HUMAN]|Actin, cytoplasmic 1 OS=Homo sapiens OX=9606 GN=ACTB PE=1 SV=1 - [ACTB_HUMAN]	7	3	P68032;Q562R1;P60709		HCD	1	0	1	1	0	3.19e-12	117	107	2.55	0	35	18	8703000	2	586.29	1171.57	0	1.01	28.53	8898	8898	MS2	0/0	0	0	hela_waters_3.raw
High	A	2	VVAVDcGIK	5894	Unambiguous	Carbamoyl-phosphate synthase [ammonia], mitochondrial OS=Homo sapiens OX=9606 GN=CPS1 PE=1 SV=2 - [CPSM_HUMAN]	1	1	P31327	C6(Carbamidomethyl)	HCD	1	0	1	1	0	0.000728	271	270	1.39	0	56	6	9801000	2	480.764	960.52	0	1.55	28.54	8899	8899	MS2	0/0	0	0	hela_waters_3.raw
High	A	2	ATFDAISK	6311	Unambiguous	40S ribosomal protein S2 OS=Homo sapiens OX=9606 GN=RPS2 PE=1 SV=2 - [RS2_HUMAN]	1	1	P15880		HCD	1	0	1	1	0.003	0.0279	130	129	1.58	0	31	7	18560000	2	426.727	852.447	0	0.95	28.54	8900	8900	MS2	0/0	0	0	hela_waters_3.raw
High	A	2	NLDDGIDDER	6313	Unambiguous	Polyadenylate-binding protein 1 OS=Homo sapiens OX=9606 GN=PABPC1 PE=1 SV=2 - [PABP1_HUMAN]	2	1	P11940		HCD	1	0	1	1	0	2.28e-06	30	32	2.45	0	47	47	10310000	2	581.255	1161.5	0	0.93	28.54	8901	8901	MS2	0/0	0	0	hela_waters_3.raw
High	A	2	GGGQIIPTAR	6315	Unambiguous	Elongation factor 2 OS=Homo sapiens OX=9606 GN=EEF2 PE=1 SV=4 - [EF2_HUMAN]|116 kDa U5 small nuclear ribonucleoprotein component OS=Homo sapiens OX=9606 GN=EFTUD2 PE=1 SV=1 - [U5S1_HUMAN]	2	2	P13639;Q15029		HCD	1	0	1	1	0.008	0.0868	137	126	1.85	0	63	6	16870000	2	485.279	969.55	0	2.32	28.54	8902	8902	MS2	0/0	0	0	hela_waters_3.raw
High	A	2	DINAYNcEEPTEK	5905	Unambiguous	Peroxiredoxin-6 OS=Homo sapiens OX=9606 GN=PRDX6 PE=1 SV=3 - [PRDX6_HUMAN]	1	1	P30041	C7(Carbamidomethyl)	HCD	1	0	1	1	0	3.55e-12	25	31	2.35	0	38	42	10170000	2	791.837	1582.67	0	-1.96	28.55	8904	8904	MS2	0/0	0	0	hela_waters_3.raw
High	A	2	TALIHDGLAR	6321	Unambiguous	40S ribosomal protein S12 OS=Homo sapiens OX=9606 GN=RPS12 PE=1 SV=3 - [RS12_HUMAN]	1	1	P25398		HCD	1	0	1	1	0	2.69e-07	111	98	2.11	0	57	3	27100000	2	533.804	1066.6	0	0.66	28.55	8907	8907	MS2	0/0	0	0	hela_waters_3.raw
High	A	2	TALIHDGLAR	6321	Unambiguous	40S ribosomal protein S12 OS=Homo sapiens OX=9606 GN=RPS12 PE=1 SV=3 - [RS12_HUMAN]	1	1	P25398		HCD	1	0	1	1	0.004	0.0447	87	81	1.8	0	17	23	9890000	3	356.205	1066.6	0	0.16	28.56	8910	8910	MS2	0/0	0	0	hela_waters_3.raw
High	A	2	FFTTPSK	6334	Unambiguous	Ribosomal L1 domain-containing protein 1 OS=Homo sapiens OX=9606 GN=RSL1D1 PE=1 SV=3 - [RL1D1_HUMAN]	1	1	O76021		HCD	1	0	1	1	0.002	0.0228	134	132	1.45	0	60	13	7394000	2	414.219	827.43	0	0.57	28.57	8914	8914	MS2	0/0	0	0	hela_waters_3.raw
High	A	2	ESVFTVEGGHR	6338	Unambiguous	Prohibitin-2 OS=Homo sapiens OX=9606 GN=PHB2 PE=1 SV=2 - [PHB2_HUMAN]	1	1	Q99623		HCD	1	0	1	1	0.001	0.0101	127	145	1.69	0	41	21	8601000	2	609.303	1217.6	0	6.82	28.57	8916	8916	MS2	0/0	0	0	hela_waters_3.raw
Middle	A	2	VGLIAAR	6340	Unambiguous	60S ribosomal protein L8 OS=Homo sapiens OX=9606 GN=RPL8 PE=1 SV=2 - [RL8_HUMAN]	1	1	P62917		HCD	1	0	1	1	0.038	0.506	90	92	1.49	0	7	60	5424000	2	350.229	699.452	0	0.68	28.57	8917	8917	MS2	0/0	0	0	hela_waters_3.raw
Middle	A	2	IQFKPDDGTTPER	5831	Unambiguous	Far upstream element-binding protein 1 OS=Homo sapiens OX=9606 GN=FUBP1 PE=1 SV=3 - [FUBP1_HUMAN]	1	1	Q96AE4		HCD	1	0	1	1	0.012	0.183	201	236	1.17	0	44	53	4445000	2	752.381	1503.76	0.01	7.76	28.58	8920	8920	MS2	0/0	0	0	hela_waters_3.raw
High	A	2	KQPPVSPGTALVGSQK	6346	Unambiguous	High mobility group protein HMG-I/HMG-Y OS=Homo sapiens OX=9606 GN=HMGA1 PE=1 SV=3 - [HMGA1_HUMAN]	1	1	P17096		HCD	1	0	1	1	0.001	0.0073	121	123	2.1	1	45	54	3530000	2	797.448	1593.89	0	-4.93	28.58	8921	8921	MS2	0/0	0	0	hela_waters_3.raw
High	A	2	AQQVAVQEQEIAR	6348	Unambiguous	Flotillin-1 OS=Homo sapiens OX=9606 GN=FLOT1 PE=1 SV=3 - [FLOT1_HUMAN]	1	1	O75955		HCD	1	0	1	1	0	1.98e-11	182	176	2.27	0	62	57	1836000	2	735.389	1469.77	0	-0.22	28.58	8922	8922	MS2	0/0	0	0	hela_waters_3.raw
High	A	2	LYGSAGPPPTGEEDTAEK	5944	Unambiguous	Endoplasmic reticulum chaperone BiP OS=Homo sapiens OX=9606 GN=HSPA5 PE=1 SV=2 - [BIP_HUMAN]	1	1	P11021		HCD	1	0	1	1	0	8.95e-12	111	113	2.56	0	48	54	8555000	2	909.924	1818.84	0	0.26	28.59	8924	8924	MS2	0/0	0	0	hela_waters_3.raw
High	A	2	AGFAGDDAPR	3936	Unambiguous	Actin, alpha cardiac muscle 1 OS=Homo sapiens OX=9606 GN=ACTC1 PE=1 SV=1 - [ACTC_HUMAN]|Actin, cytoplasmic 1 OS=Homo sapiens OX=9606 GN=ACTB PE=1 SV=1 - [ACTB_HUMAN]	10	2	P68032;P60709		HCD	1	0	1	1	0	4.69e-06	78	86	1.77	0	60	6	12800000	2	488.728	976.449	0	0.62	28.59	8925	8925	MS2	0/0	0	0	hela_waters_3.raw
High	A	2	LLEDLR	6354	Unambiguous	Keratin, type I cytoskeletal 18 OS=Homo sapiens OX=9606 GN=KRT18 PE=1 SV=2 - [K1C18_HUMAN]	3	1	P05783		HCD	1	0	1	1	0.002	0.0186	232	228	1.69	0	23	17	12660000	2	379.724	758.441	0	0.32	28.59	8926	8926	MS2	0/0	0	0	hela_waters_3.raw
High	A	2	IIEDLR	6354	Unambiguous	Keratin, type I cytoskeletal 18 OS=Homo sapiens OX=9606 GN=KRT18 PE=1 SV=2 - [K1C18_HUMAN]	3	1	P05783		HCD	1	0	1	2	0.002	0.0186	232	228	1.69	0	23	17	12660000	2	379.724	758.441	0	0.32	28.59	8926	8926	MS2	0/0	0	0	hela_waters_3.raw
High	A	2	ASGNYATVISHNPETK	5952	Unambiguous	60S ribosomal protein L8 OS=Homo sapiens OX=9606 GN=RPL8 PE=1 SV=2 - [RL8_HUMAN]	1	1	P62917		HCD	1	0	1	1	0	3.67e-15	183	191	2.32	0	38	15	11640000	3	563.613	1688.83	0	0.72	28.6	8928	8928	MS2	0/0	0	0	hela_waters_3.raw
High	A	2	LEGFHTQISK	6359	Unambiguous	Proteasome activator complex subunit 1 OS=Homo sapiens OX=9606 GN=PSME1 PE=1 SV=1 - [PSME1_HUMAN]	1	1	Q06323		HCD	1	0	1	1	0.009	0.11	282	263	1.51	0	56	14	8760000	2	580.311	1159.61	0	2.84	28.6	8929	8929	MS2	0/0	0	0	hela_waters_3.raw
High	A	2	EDMAALEK	5139	Unambiguous	Tubulin alpha-1A chain OS=Homo sapiens OX=9606 GN=TUBA1A PE=1 SV=1 - [TBA1A_HUMAN]|Tubulin alpha-1B chain OS=Homo sapiens OX=9606 GN=TUBA1B PE=1 SV=1 - [TBA1B_HUMAN]|Tubulin alpha-1C chain OS=Homo sapiens OX=9606 GN=TUBA1C PE=1 SV=1 - [TBA1C_HUMAN]|Tubulin alpha-4A chain OS=Homo sapiens OX=9606 GN=TUBA4A PE=1 SV=1 - [TBA4A_HUMAN]	4	2	Q9BQE3;P68366		HCD	1	0	1	1	0	0.00372	89	92	1.56	0	45	8	11250000	2	453.716	906.424	0	0.45	28.61	8932	8932	MS2	0/0	0	0	hela_waters_3.raw
High	A	2	VVTDTDETELAR	6365	Unambiguous	Eukaryotic translation initiation factor 2 subunit 1 OS=Homo sapiens OX=9606 GN=EIF2S1 PE=1 SV=3 - [IF2A_HUMAN]	1	1	P05198		HCD	1	0	1	1	0	1.27e-14	182	205	2.86	0	48	44	13010000	2	674.833	1348.66	0	-0.38	28.61	8933	8933	MS2	0/0	0	0	hela_waters_3.raw
High	A	2	KLEEEGEQFVK	6367	Unambiguous	Non-specific lipid-transfer protein OS=Homo sapiens OX=9606 GN=SCP2 PE=1 SV=2 - [NLTP_HUMAN]	1	1	P22307		HCD	1	0	1	1	0	0.000145	221	220	3.01	1	36	51	6304000	2	668.346	1335.69	0	4.83	28.61	8934	8934	MS2	0/0	0	0	hela_waters_3.raw
High	A	2	TPAQYDASELK	5751	Unambiguous	Annexin A2 OS=Homo sapiens OX=9606 GN=ANXA2 PE=1 SV=2 - [ANXA2_HUMAN]	2	1	P07355		HCD	1	0	1	1	0	4.21e-16	185	182	2.76	0	14	10	40800000	2	611.801	1222.6	0	0.47	28.61	8935	8935	MS2	0/0	0	0	hela_waters_3.raw
High	A	2	FcLDNGAK	5577	Unambiguous	Phosphoglycerate kinase 1 OS=Homo sapiens OX=9606 GN=PGK1 PE=1 SV=3 - [PGK1_HUMAN]	1	1	P00558	C2(Carbamidomethyl)	HCD	1	0	1	1	0	0.000361	102	94	1.35	0	59	7	11490000	2	462.716	924.425	0	1.06	28.62	8937	8937	MS2	0/0	0	0	hela_waters_3.raw
High	A	2	ETAEAYLGK	5814	Unambiguous	Endoplasmic reticulum chaperone BiP OS=Homo sapiens OX=9606 GN=HSPA5 PE=1 SV=2 - [BIP_HUMAN]	1	1	P11021		HCD	1	0	1	1	0	0.00376	156	167	1.43	0	52	20	7915000	2	491.249	981.491	0	2.39	28.62	8938	8938	MS2	0/0	0	0	hela_waters_3.raw
High	A	2	ASGNYATVISHNPETK	5952	Unambiguous	60S ribosomal protein L8 OS=Homo sapiens OX=9606 GN=RPL8 PE=1 SV=2 - [RL8_HUMAN]	1	1	P62917		HCD	1	0	1	1	0	6.76e-13	183	194	2.78	0	11	43	7125000	2	844.917	1688.83	0	1.38	28.63	8940	8940	MS2	0/0	0	0	hela_waters_3.raw
High	A	2	IDEPLEGSEDR	6381	Unambiguous	Heterogeneous nuclear ribonucleoprotein K OS=Homo sapiens OX=9606 GN=HNRNPK PE=1 SV=1 - [HNRPK_HUMAN]	1	1	P61978		HCD	1	0	1	1	0	4.69e-12	52	65	2.12	0	60	48	8795000	2	630.289	1259.57	0	-3.93	28.63	8943	8943	MS2	0/0	0	0	hela_waters_3.raw
High	A	2	EQIVPKPEEEVAQK	6385	Unambiguous	60S ribosomal protein L17 OS=Homo sapiens OX=9606 GN=RPL17 PE=1 SV=3 - [RL17_HUMAN]	1	1	P18621		HCD	1	0	1	1	0	9.13e-07	197	177	1.9	0	80	48	5126000	2	812.428	1623.85	-0.01	-6.3	28.64	8946	8946	MS2	0/0	0	0	hela_waters_3.raw
High	A	2	QDPSVLHTEEMR	6387	Unambiguous	Hsc70-interacting protein OS=Homo sapiens OX=9606 GN=ST13 PE=1 SV=2 - [F10A1_HUMAN]	2	1	P50502		HCD	1	0	1	1	0	4.78e-14	134	119	2.52	0	34	54	3791000	2	721.342	1441.68	0	1.3	28.64	8947	8947	MS2	0/0	0	0	hela_waters_3.raw
High	A	2	MEEESGAPGVPSGNGAPGPK	6391	Unambiguous	Heterogeneous nuclear ribonucleoprotein M OS=Homo sapiens OX=9606 GN=HNRNPM PE=1 SV=3 - [HNRPM_HUMAN]	1	1	P52272		HCD	1	0	1	1	0	6.97e-12	75	81	2.38	0	53	60	4493000	2	934.423	1867.84	-0.01	-6.09	28.65	8950	8950	MS2	0/0	0	0	hela_waters_3.raw
High	A	2	VHSFPTLK	6397	Unambiguous	Protein disulfide-isomerase OS=Homo sapiens OX=9606 GN=P4HB PE=1 SV=3 - [PDIA1_HUMAN]	1	1	P07237		HCD	1	0	1	1	0.003	0.04	143	170	1.78	0	32	28	7467000	2	464.767	928.526	0	1.21	28.65	8952	8952	MS2	0/0	0	0	hela_waters_3.raw
High	A	2	SSFYPDGGDQETAK	6403	Unambiguous	Bcl-2-associated transcription factor 1 OS=Homo sapiens OX=9606 GN=BCLAF1 PE=1 SV=2 - [BCLF1_HUMAN]	1	1	Q9NYF8		HCD	1	0	1	1	0.001	0.00569	42	42	1.29	0	13	56	3418000	2	751.325	1501.64	0	-1.54	28.66	8955	8955	MS2	0/0	0	0	hela_waters_3.raw
High	A	2	DDLGNTLEK	6407	Unambiguous	Core histone macro-H2A.1 OS=Homo sapiens OX=9606 GN=H2AFY PE=1 SV=4 - [H2AY_HUMAN]	1	1	O75367		HCD	1	0	1	1	0.001	0.0124	139	134	1.77	0	67	11	5597000	2	502.747	1004.49	0	-1.93	28.67	8959	8959	MS2	0/0	0	0	hela_waters_3.raw
Middle	A	2	ELEIEER	6409	Unambiguous	Eukaryotic translation initiation factor 3 subunit A OS=Homo sapiens OX=9606 GN=EIF3A PE=1 SV=1 - [EIF3A_HUMAN]	1	1	Q14152		HCD	1	0	1	1	0.017	0.234	145	147	1.49	0	69	11	6561000	2	459.23	917.453	0	-4.45	28.67	8960	8960	MS2	0/0	0	0	hela_waters_3.raw
High	A	2	LQDEIQNMK	6411	Unambiguous	Vimentin OS=Homo sapiens OX=9606 GN=VIM PE=1 SV=4 - [VIME_HUMAN]	1	1	P08670		HCD	1	0	1	1	0	0.00361	162	166	1.92	0	50	8	15120000	2	559.779	1118.55	0	-0.45	28.67	8961	8961	MS2	0/0	0	0	hela_waters_3.raw
High	A	2	DIDIHEVR	6420	Unambiguous	Heterogeneous nuclear ribonucleoprotein U OS=Homo sapiens OX=9606 GN=HNRNPU PE=1 SV=6 - [HNRPU_HUMAN]	1	1	Q00839		HCD	1	0	1	1	0.001	0.013	131	134	1.62	0	59	3	31360000	2	498.759	996.51	0	-0.45	28.69	8967	8967	MS2	0/0	0	0	hela_waters_3.raw
High	A	2	IGAEVYHNLK	5629	Unambiguous	Alpha-enolase OS=Homo sapiens OX=9606 GN=ENO1 PE=1 SV=2 - [ENOA_HUMAN]	1	1	P06733		HCD	1	0	1	1	0	2.14e-06	236	240	2.09	0	20	7	29040000	2	572.311	1143.62	0	-0.06	28.7	8970	8970	MS2	0/0	0	0	hela_waters_3.raw
High	A	2	ILSGVVTK	6426	Unambiguous	40S ribosomal protein S11 OS=Homo sapiens OX=9606 GN=RPS11 PE=1 SV=3 - [RS11_HUMAN]	1	1	P62280		HCD	1	0	1	1	0	0.0043	64	57	1.84	0	48	13	11950000	2	408.763	816.519	0	-0.3	28.7	8971	8971	MS2	0/0	0	0	hela_waters_3.raw
High	A	2	VVTQNIcQYR	6428	Unambiguous	Cell cycle and apoptosis regulator protein 2 OS=Homo sapiens OX=9606 GN=CCAR2 PE=1 SV=2 - [CCAR2_HUMAN]	1	1	Q8N163	C7(Carbamidomethyl)	HCD	1	0	1	1	0	7.24e-05	210	203	1.97	0	65	59	3680000	2	640.827	1280.65	0	3.46	28.7	8972	8972	MS2	0/0	0	0	hela_waters_3.raw
High	A	2	YDDMAAcMK	5920	Unambiguous	14-3-3 protein zeta/delta OS=Homo sapiens OX=9606 GN=YWHAZ PE=1 SV=1 - [1433Z_HUMAN]	1	1	P63104	C7(Carbamidomethyl)	HCD	1	0	1	1	0.004	0.0487	3	2	0.95	0	71	6	9808000	2	552.712	1104.42	0	0.24	28.71	8974	8974	MS2	0/0	0	0	hela_waters_3.raw
High	A	2	NSNPALNDNLEK	5641	Unambiguous	Chloride intracellular channel protein 1 OS=Homo sapiens OX=9606 GN=CLIC1 PE=1 SV=4 - [CLIC1_HUMAN]	1	1	O00299		HCD	1	0	1	1	0	1.17e-07	132	151	1.9	0	33	53	5034000	2	664.826	1328.64	0	0.42	28.71	8975	8975	MS2	0/0	0	0	hela_waters_3.raw
Middle	A	2	IRYESLTDPSK	6433	Unambiguous	Heat shock protein HSP 90-beta OS=Homo sapiens OX=9606 GN=HSP90AB1 PE=1 SV=4 - [HS90B_HUMAN]|Heat shock protein HSP 90-alpha OS=Homo sapiens OX=9606 GN=HSP90AA1 PE=1 SV=5 - [HS90A_HUMAN]|Putative heat shock protein HSP 90-beta 4 OS=Homo sapiens OX=9606 GN=HSP90AB4P PE=5 SV=1 - [H90B4_HUMAN]	5	2	P08238;P07900		HCD	1	0	1	1	0.022	0.295	191	195	2.05	1	55	26	5650000	3	436.898	1308.68	0	1	28.71	8976	8976	MS2	0/0	0	0	hela_waters_3.raw
High	A	2	SEPIPESNDGPVK	6044	Unambiguous	Protein disulfide-isomerase A3 OS=Homo sapiens OX=9606 GN=PDIA3 PE=1 SV=4 - [PDIA3_HUMAN]	1	1	P30101		HCD	1	0	1	1	0	1.53e-09	143	137	2.19	0	46	43	10730000	2	684.835	1368.66	0	-1.78	28.71	8977	8977	MS2	0/0	0	0	hela_waters_3.raw
High	A	2	SGQGAFGNMcR	5507	Unambiguous	60S ribosomal protein L4 OS=Homo sapiens OX=9606 GN=RPL4 PE=1 SV=5 - [RL4_HUMAN]	1	1	P36578	C10(Carbamidomethyl)	HCD	1	0	1	1	0	3e-05	34	29	1.87	0	72	60	4276000	2	592.751	1184.49	0	0.49	28.71	8978	8978	MS2	0/0	0	0	hela_waters_3.raw
Middle	A	2	LPGAGGSLR	6439	Unambiguous	Transmembrane protein 131-like OS=Homo sapiens OX=9606 GN=TMEM131L PE=1 SV=2 - [T131L_HUMAN]	1	1	A2VDJ0		HCD	1	0	1	1	0.04	0.543	104	101	1.27	0	75	12	6588000	2	414.241	827.474	0	1.11	28.71	8979	8979	MS2	0/0	0	0	hela_waters_3.raw
High	A	2	ITDSAGHILYSK	6441	Unambiguous	Transmembrane emp24 domain-containing protein 10 OS=Homo sapiens OX=9606 GN=TMED10 PE=1 SV=2 - [TMEDA_HUMAN]	1	1	P49755		HCD	1	0	1	1	0	4.51e-10	282	263	1.99	0	63	32	6501000	3	435.567	1304.69	0	1.51	28.71	8980	8980	MS2	0/0	0	0	hela_waters_3.raw
High	A	2	LAADDFR	6445	Unambiguous	Keratin, type I cytoskeletal 17 OS=Homo sapiens OX=9606 GN=KRT17 PE=1 SV=2 - [K1C17_HUMAN]|Keratin, type I cytoskeletal 18 OS=Homo sapiens OX=9606 GN=KRT18 PE=1 SV=2 - [K1C18_HUMAN]|Keratin, type I cytoskeletal 19 OS=Homo sapiens OX=9606 GN=KRT19 PE=1 SV=4 - [K1C19_HUMAN]|Keratin, type I cytoskeletal 10 OS=Homo sapiens OX=9606 GN=KRT10 PE=1 SV=6 - [K1C10_HUMAN]	17	4	Q04695;P05783;P08727;P13645		HCD	1	0	1	1	0.001	0.00604	156	154	1.94	0	17	2	74400000	2	404.204	807.4	0	0.52	28.72	8983	8983	MS2	0/0	0	0	hela_waters_3.raw
High	A	2	FAVLHGEAPR	6447	Unambiguous	Eukaryotic translation initiation factor 3 subunit B OS=Homo sapiens OX=9606 GN=EIF3B PE=1 SV=3 - [EIF3B_HUMAN]	1	1	P55884		HCD	1	0	1	1	0.001	0.00598	156	164	1.75	0	57	60	3284000	3	366.202	1096.59	0	1.35	28.72	8984	8984	MS2	0/0	0	0	hela_waters_3.raw
High	A	2	FAcFER	6453	Unambiguous	Phosphate carrier protein, mitochondrial OS=Homo sapiens OX=9606 GN=SLC25A3 PE=1 SV=2 - [MPCP_HUMAN]	1	1	Q00325	C3(Carbamidomethyl)	HCD	1	0	1	1	0.008	0.103	33	35	1.6	0	50	9	10800000	2	415.186	829.366	0	-0.56	28.73	8988	8988	MS2	0/0	0	0	hela_waters_3.raw
High	A	2	SAINEVVTR	6457	Unambiguous	60S ribosomal protein L31 OS=Homo sapiens OX=9606 GN=RPL31 PE=1 SV=1 - [RL31_HUMAN]	1	1	P62899		HCD	1	0	1	1	0	6.27e-05	279	288	1.85	0	46	2	54520000	2	494.775	988.544	0	1.47	28.74	8991	8991	MS2	0/0	0	0	hela_waters_3.raw
High	A	2	TAVcDIPPR	6459	Unambiguous	Tubulin beta-2A chain OS=Homo sapiens OX=9606 GN=TUBB2A PE=1 SV=1 - [TBB2A_HUMAN]|Tubulin beta-4A chain OS=Homo sapiens OX=9606 GN=TUBB4A PE=1 SV=2 - [TBB4A_HUMAN]|Tubulin beta-4B chain OS=Homo sapiens OX=9606 GN=TUBB4B PE=1 SV=1 - [TBB4B_HUMAN]|Tubulin beta chain OS=Homo sapiens OX=9606 GN=TUBB PE=1 SV=2 - [TBB5_HUMAN]	7	2	P68371;P07437	C4(Carbamidomethyl)	HCD	1	0	1	1	0	1.74e-06	126	123	1.96	0	41	4	30190000	2	514.763	1028.52	0	-0.41	28.74	8992	8992	MS2	0/0	0	0	hela_waters_3.raw
High	A	2	HWGGNVLGPK	6461	Unambiguous	60S ribosomal protein L7a OS=Homo sapiens OX=9606 GN=RPL7A PE=1 SV=2 - [RL7A_HUMAN]	1	1	P62424		HCD	1	0	1	1	0.002	0.0182	176	171	1.68	0	42	2	36990000	2	532.784	1064.56	0	-3.44	28.74	8993	8993	MS2	0/0	0	0	hela_waters_3.raw
High	A	2	LESGMQNMSIHTK	6463	Unambiguous	Keratin, type II cytoskeletal 8 OS=Homo sapiens OX=9606 GN=KRT8 PE=1 SV=7 - [K2C8_HUMAN]	1	1	P05787		HCD	1	0	1	1	0	1.81e-05	101	114	1.24	0	20	41	11470000	2	738.351	1475.7	0	-1.75	28.74	8994	8994	MS2	0/0	0	0	hela_waters_3.raw
High	A	2	IGAEVYHNLK	5629	Unambiguous	Alpha-enolase OS=Homo sapiens OX=9606 GN=ENO1 PE=1 SV=2 - [ENOA_HUMAN]	1	1	P06733		HCD	1	0	1	1	0.001	0.0129	219	225	2.38	0	41	15	10510000	3	381.877	1143.62	0	0.35	28.74	8995	8995	MS2	0/0	0	0	hela_waters_3.raw
High	A	2	EIAQDFK	4848	Unambiguous	Histone H3.1 OS=Homo sapiens OX=9606 GN=HIST1H3A PE=1 SV=2 - [H31_HUMAN]	4	1	P68431		HCD	1	0	1	1	0.005	0.0593	133	162	1.33	0	25	11	16200000	2	425.719	850.431	0	0.19	28.77	9006	9006	MS2	0/0	0	0	hela_waters_3.raw
High	A	2	IFAPNHVVAK	5583	Unambiguous	60S ribosomal protein L18a OS=Homo sapiens OX=9606 GN=RPL18A PE=1 SV=2 - [RL18A_HUMAN]	1	1	Q02543		HCD	1	0	1	1	0	3.58e-05	96	79	1.75	0	73	45	2069000	3	365.882	1095.63	0	-0.03	28.77	9008	9008	MS2	0/0	0	0	hela_waters_3.raw
High	A	2	VGAHAGEYGAEALER	6490	Unambiguous	Hemoglobin subunit alpha OS=Homo sapiens OX=9606 GN=HBA1 PE=1 SV=2 - [HBA_HUMAN]	1	1	P69905		HCD	1	0	1	1	0	1.9e-10	149	138	2.48	0	7	37	14940000	2	765.371	1529.74	0	0.67	28.77	9009	9009	MS2	0/0	0	0	hela_waters_3.raw
High	A	2	LNLVQR	5696	Unambiguous	L-lactate dehydrogenase B chain OS=Homo sapiens OX=9606 GN=LDHB PE=1 SV=2 - [LDHB_HUMAN]|L-lactate dehydrogenase A chain OS=Homo sapiens OX=9606 GN=LDHA PE=1 SV=2 - [LDHA_HUMAN]	3	2	P07195;P00338		HCD	1	0	1	1	0.008	0.0879	81	79	1.88	0	33	21	10590000	2	371.732	742.457	0	-0.35	28.78	9012	9012	MS2	0/0	0	0	hela_waters_3.raw
High	A	2	TADGIVSHLK	6096	Unambiguous	Protein disulfide-isomerase A3 OS=Homo sapiens OX=9606 GN=PDIA3 PE=1 SV=4 - [PDIA3_HUMAN]	1	1	P30101		HCD	1	0	1	1	0.002	0.0136	138	133	1.65	0	65	23	5884000	2	520.791	1040.58	0	2	28.78	9013	9013	MS2	0/0	0	0	hela_waters_3.raw
High	A	2	STAGDTHLGGEDFDNR	5595	Unambiguous	Heat shock cognate 71 kDa protein OS=Homo sapiens OX=9606 GN=HSPA8 PE=1 SV=1 - [HSP7C_HUMAN]	2	1	P11142		HCD	1	0	1	1	0	5.06e-06	40	38	2.66	0	33	45	8980000	2	846.367	1691.73	0	0.99	28.78	9016	9016	MS2	0/0	0	0	hela_waters_3.raw
High	A	2	MLQPcGPPADKPEEN	6507	Unambiguous	Splicing factor 3B subunit 5 OS=Homo sapiens OX=9606 GN=SF3B5 PE=1 SV=1 - [SF3B5_HUMAN]	1	1	Q9BWJ5	C5(Carbamidomethyl)	HCD	1	0	1	1	0.003	0.0278	88	82	1.51	0	54	57	2596000	2	841.879	1682.75	0	0.01	28.79	9018	9018	MS2	0/0	0	0	hela_waters_3.raw
High	A	2	QEYDESGPSIVHR	5305	Unambiguous	Actin, cytoplasmic 1 OS=Homo sapiens OX=9606 GN=ACTB PE=1 SV=1 - [ACTB_HUMAN]	7	1	P60709		HCD	1	0	1	1	0	5.63e-11	90	103	2.45	0	8	5	44500000	3	506.24	1516.7	0	0.82	28.79	9020	9020	MS2	0/0	0	0	hela_waters_3.raw
High	A	2	VGAHAGEYGAEALER	6490	Unambiguous	Hemoglobin subunit alpha OS=Homo sapiens OX=9606 GN=HBA1 PE=1 SV=2 - [HBA_HUMAN]	1	1	P69905		HCD	1	0	1	1	0	2.89e-06	150	140	2.92	0	20	17	17920000	3	510.583	1529.74	0	0.48	28.8	9022	9022	MS2	0/0	0	0	hela_waters_3.raw
High	A	2	VcNPIITK	6120	Unambiguous	Heat shock cognate 71 kDa protein OS=Homo sapiens OX=9606 GN=HSPA8 PE=1 SV=1 - [HSP7C_HUMAN]	1	1	P11142	C2(Carbamidomethyl)	HCD	1	0	1	2	0.005	0.0638	314	299	1.28	0	34	4	34740000	2	472.766	944.525	0	1.7	28.81	9026	9026	MS2	0/0	0	0	hela_waters_3.raw
High	A	2	QSVENDIHGLR	6124	Unambiguous	Keratin, type I cytoskeletal 18 OS=Homo sapiens OX=9606 GN=KRT18 PE=1 SV=2 - [K1C18_HUMAN]	1	1	P05783		HCD	1	0	1	1	0	7.98e-13	184	193	2.61	0	28	43	10280000	2	634.323	1267.64	0	-0.41	28.81	9027	9027	MS2	0/0	0	0	hela_waters_3.raw
High	A	2	IMWSQR	6525	Unambiguous	Polyadenylate-binding protein 4 OS=Homo sapiens OX=9606 GN=PABPC4 PE=1 SV=1 - [PABP4_HUMAN]|Polyadenylate-binding protein 1 OS=Homo sapiens OX=9606 GN=PABPC1 PE=1 SV=2 - [PABP1_HUMAN]|Polyadenylate-binding protein 1-like OS=Homo sapiens OX=9606 GN=PABPC1L PE=2 SV=1 - [PAP1L_HUMAN]	6	3	Q13310;P11940;Q4VXU2		HCD	1	0	1	1	0.009	0.116	169	171	1.12	0	38	14	8551000	2	410.71	820.413	0	-0.33	28.81	9029	9029	MS2	0/0	0	0	hela_waters_3.raw
High	A	2	LMWSQR	6525	Unambiguous	Polyadenylate-binding protein 4 OS=Homo sapiens OX=9606 GN=PABPC4 PE=1 SV=1 - [PABP4_HUMAN]|Polyadenylate-binding protein 1 OS=Homo sapiens OX=9606 GN=PABPC1 PE=1 SV=2 - [PABP1_HUMAN]|Polyadenylate-binding protein 1-like OS=Homo sapiens OX=9606 GN=PABPC1L PE=2 SV=1 - [PAP1L_HUMAN]	6	3	Q13310;P11940;Q4VXU2		HCD	1	0	1	2	0.009	0.116	169	171	1.12	0	38	14	8551000	2	410.71	820.413	0	-0.33	28.81	9029	9029	MS2	0/0	0	0	hela_waters_3.raw
High	A	2	EDLNcQEEEDPMNK	6528	Unambiguous	Eukaryotic translation initiation factor 3 subunit G OS=Homo sapiens OX=9606 GN=EIF3G PE=1 SV=2 - [EIF3G_HUMAN]	1	1	O75821	C5(Carbamidomethyl)	HCD	1	0	1	1	0	4.42e-07	11	12	2.2	0	0	59	2047000	2	875.848	1750.69	0	-0.3	28.81	9030	9030	MS2	0/0	0	0	hela_waters_3.raw
High	A	2	YRPGTVALR	4410	Unambiguous	Histone H3.1 OS=Homo sapiens OX=9606 GN=HIST1H3A PE=1 SV=2 - [H31_HUMAN]	5	1	P68431		HCD	1	0	1	1	0	0.000417	167	173	1.79	0	37	3	35500000	2	516.802	1032.6	0	1.62	28.82	9033	9033	MS2	0/0	0	0	hela_waters_3.raw
High	A	2	QSVENDIHGLR	6124	Unambiguous	Keratin, type I cytoskeletal 18 OS=Homo sapiens OX=9606 GN=KRT18 PE=1 SV=2 - [K1C18_HUMAN]	1	1	P05783		HCD	1	0	1	1	0	6.83e-09	185	196	2.34	0	47	22	7421000	3	423.218	1267.64	0	0.83	28.82	9034	9034	MS2	0/0	0	0	hela_waters_3.raw
Middle	A	2	LESGMQNMSIHTK	6463	Unambiguous	Keratin, type II cytoskeletal 8 OS=Homo sapiens OX=9606 GN=KRT8 PE=1 SV=7 - [K2C8_HUMAN]	1	1	P05787		HCD	1	0	1	1	0.021	0.282	107	113	1.16	0	26	4	59190000	3	492.571	1475.7	0	0.89	28.82	9035	9035	MS2	0/0	0	0	hela_waters_3.raw
High	A	2	SMMNLQTK	6538	Unambiguous	DNA topoisomerase 1 OS=Homo sapiens OX=9606 GN=TOP1 PE=1 SV=2 - [TOP1_HUMAN]	1	1	P11387		HCD	1	0	1	1	0.007	0.0855	114	106	1.77	0	70	25	5013000	2	476.732	952.457	0	-2.06	28.82	9036	9036	MS2	0/0	0	0	hela_waters_3.raw
High	A	2	ENAEVDGDDDAEEMEAK	5658	Unambiguous	Eukaryotic translation initiation factor 2 subunit 1 OS=Homo sapiens OX=9606 GN=EIF2S1 PE=1 SV=3 - [IF2A_HUMAN]	1	1	P05198		HCD	1	0	1	1	0	2.46e-06	5	7	1.87	0	47	60	2748000	2	933.862	1866.72	0	-0.64	28.83	9038	9038	MS2	0/0	0	0	hela_waters_3.raw
High	A	2	FNEVAAQYSEDK	6546	Unambiguous	Peptidyl-prolyl cis-trans isomerase NIMA-interacting 4 OS=Homo sapiens OX=9606 GN=PIN4 PE=1 SV=1 - [PIN4_HUMAN]	1	1	Q9Y237		HCD	1	0	1	1	0	4.04e-07	67	64	1.85	0	53	55	4618000	2	700.819	1400.63	0	-1.6	28.83	9041	9041	MS2	0/0	0	0	hela_waters_3.raw
High	A	2	EEAEAPVEDGSQPPPPEPK	6555	Unambiguous	Hypoxia up-regulated protein 1 OS=Homo sapiens OX=9606 GN=HYOU1 PE=1 SV=1 - [HYOU1_HUMAN]	1	1	Q9Y4L1		HCD	1	0	1	1	0.004	0.0497	94	97	1.23	0		60	0	2	1001.97	2002.92	0	0	28.84	9046	9046	MS2	0/0	0	0	hela_waters_3.raw
High	A	2	AALAHSEEVTASQVAATK	6563	Unambiguous	Plectin OS=Homo sapiens OX=9606 GN=PLEC PE=1 SV=3 - [PLEC_HUMAN]	1	1	Q15149		HCD	1	0	1	1	0.002	0.018	200	191	1.53	0	25	60	3335000	2	892.46	1783.91	0	-2.97	28.85	9049	9049	MS2	0/0	0	0	hela_waters_3.raw
High	A	2	YDDMAAAMK	6569	Unambiguous	14-3-3 protein beta/alpha OS=Homo sapiens OX=9606 GN=YWHAB PE=1 SV=3 - [1433B_HUMAN]|14-3-3 protein gamma OS=Homo sapiens OX=9606 GN=YWHAG PE=1 SV=2 - [1433G_HUMAN]	2	2	P31946;P61981		HCD	1	0	1	1	0.001	0.00918	22	15	1.26	0	49	2	48700000	2	508.215	1015.42	0	0.8	28.86	9053	9053	MS2	0/0	0	0	hela_waters_3.raw
High	A	2	APGIIPR	6571	Unambiguous	ATP synthase subunit alpha, mitochondrial OS=Homo sapiens OX=9606 GN=ATP5F1A PE=1 SV=1 - [ATPA_HUMAN]	1	1	P25705		HCD	1	0	1	1	0.002	0.0171	29	33	1.71	0	42	11	15060000	2	362.229	723.451	0	0.24	28.86	9054	9054	MS2	0/0	0	0	hela_waters_3.raw
High	A	2	FEGAIYR	6575	Unambiguous	Trifunctional purine biosynthetic protein adenosine-3 OS=Homo sapiens OX=9606 GN=GART PE=1 SV=1 - [PUR2_HUMAN]	1	1	P22102		HCD	1	0	1	1	0.005	0.0585	115	118	1.76	0	39	60	5785000	2	428.222	855.437	0	1.35	28.87	9057	9057	MS2	0/0	0	0	hela_waters_3.raw
High	A	2	DISTNYYASQK	6579	Unambiguous	Endoplasmin OS=Homo sapiens OX=9606 GN=HSP90B1 PE=1 SV=1 - [ENPL_HUMAN]	1	1	P14625		HCD	1	0	1	1	0	2.21e-05	97	95	1.49	0	54	17	10270000	2	645.304	1289.6	0	0.22	28.87	9059	9059	MS2	0/0	0	0	hela_waters_3.raw
High	A	2	YLAEVAAGDDK	6172	Unambiguous	14-3-3 protein zeta/delta OS=Homo sapiens OX=9606 GN=YWHAZ PE=1 SV=1 - [1433Z_HUMAN]	1	1	P63104		HCD	1	0	1	1	0	0.00124	188	182	2.12	0	28	4	38610000	2	576.285	1151.56	0	4.95	28.88	9062	9062	MS2	0/0	0	0	hela_waters_3.raw
High	A	2	LQEEMLQR	6589	Unambiguous	Vimentin OS=Homo sapiens OX=9606 GN=VIM PE=1 SV=4 - [VIME_HUMAN]	1	1	P08670		HCD	1	0	1	1	0	7.71e-07	227	211	1.94	0	44	3	42280000	2	523.768	1046.53	0	-0.47	28.88	9065	9065	MS2	0/0	0	0	hela_waters_3.raw
High	A	2	DGQVINETSQHHDDLE	5617	Unambiguous	Vimentin OS=Homo sapiens OX=9606 GN=VIM PE=1 SV=4 - [VIME_HUMAN]	1	1	P08670		HCD	1	0	1	1	0.003	0.0289	82	55	1.83	0	10	60	3281000	2	918.904	1836.8	0	0.77	28.88	9066	9066	MS2	0/0	0	0	hela_waters_3.raw
High	A	2	TANDMIHAENMR	5497	Unambiguous	Moesin OS=Homo sapiens OX=9606 GN=MSN PE=1 SV=3 - [MOES_HUMAN]	1	1	P26038		HCD	1	0	1	1	0	0.00164	66	65	1.62	0	70	28	4584000	3	468.212	1402.62	0	0.46	28.88	9067	9067	MS2	0/0	0	0	hela_waters_3.raw
Middle	A	2	GGLIAYR	6597	Unambiguous	Inositol polyphosphate 1-phosphatase OS=Homo sapiens OX=9606 GN=INPP1 PE=1 SV=1 - [INPP_HUMAN]	1	1	P49441		HCD	1	0	1	3	0.042	0.592	126	131	1.22	0	62	60	1781000	2	375.219	749.431	0	0.14	28.89	9068	9068	MS2	0/0	0	0	hela_waters_3.raw
High	A	2	IIAPPER	4449	Unambiguous	Actin, alpha cardiac muscle 1 OS=Homo sapiens OX=9606 GN=ACTC1 PE=1 SV=1 - [ACTC_HUMAN]|Beta-actin-like protein 2 OS=Homo sapiens OX=9606 GN=ACTBL2 PE=1 SV=2 - [ACTBL_HUMAN]|Actin, cytoplasmic 1 OS=Homo sapiens OX=9606 GN=ACTB PE=1 SV=1 - [ACTB_HUMAN]	7	3	P68032;Q562R1;P60709		HCD	1	0	1	1	0.008	0.0879	61	60	1.6	0	60	10	10170000	2	398.24	795.472	0	-0.03	28.89	9070	9070	MS2	0/0	0	0	hela_waters_3.raw
High	A	2	AAEAAAAPAESAAPAAGEEPSK	4808	Unambiguous	Brain acid soluble protein 1 OS=Homo sapiens OX=9606 GN=BASP1 PE=1 SV=2 - [BASP1_HUMAN]	1	1	P80723		HCD	1	0	1	1	0.001	0.00791	133	138	1.51	0	72	60	1205000	2	983.971	1966.93	0	-0.32	28.9	9072	9072	MS2	0/0	0	0	hela_waters_3.raw
High	A	2	VIGSGcNLDSAR	4978	Unambiguous	L-lactate dehydrogenase B chain OS=Homo sapiens OX=9606 GN=LDHB PE=1 SV=2 - [LDHB_HUMAN]|L-lactate dehydrogenase A chain OS=Homo sapiens OX=9606 GN=LDHA PE=1 SV=2 - [LDHA_HUMAN]	4	2	P07195;P00338	C6(Carbamidomethyl)	HCD	1	0	1	1	0	4.21e-16	151	122	2.36	0	15	9	31310000	2	624.803	1248.6	0	-0.61	28.91	9075	9075	MS2	0/0	0	0	hela_waters_3.raw
Middle	A	2	EPIVGSTDYGK	6606	Unambiguous	Spectrin alpha chain, non-erythrocytic 1 OS=Homo sapiens OX=9606 GN=SPTAN1 PE=1 SV=3 - [SPTN1_HUMAN]	1	1	Q13813		HCD	1	0	1	1	0.03	0.395	190	185	1.23	0	57	21	7337000	2	583.289	1165.57	0	-2.56	28.91	9076	9076	MS2	0/0	0	0	hela_waters_3.raw
High	A	2	SVTEQGAELSNEER	4818	Unambiguous	14-3-3 protein zeta/delta OS=Homo sapiens OX=9606 GN=YWHAZ PE=1 SV=1 - [1433Z_HUMAN]	1	1	P63104		HCD	1	0	1	1	0	1.91e-09	79	73	2.6	0	83	56	3336000	2	774.854	1548.7	-0.01	-8.13	28.91	9077	9077	MS2	0/0	0	0	hela_waters_3.raw
High	A	2	VTLTSEEEAR	4776	Unambiguous	L-lactate dehydrogenase A chain OS=Homo sapiens OX=9606 GN=LDHA PE=1 SV=2 - [LDHA_HUMAN]	1	1	P00338		HCD	1	0	1	1	0	9.44e-11	219	206	1.43	0	55	5	15210000	2	567.785	1134.56	0	-1.18	28.92	9079	9079	MS2	0/0	0	0	hela_waters_3.raw
High	A	2	MVVMHPMPR	6622	Unambiguous	CAD protein OS=Homo sapiens OX=9606 GN=CAD PE=1 SV=3 - [PYR1_HUMAN]	1	1	P27708		HCD	1	0	1	1	0.006	0.071	121	125	1.56	0	73	60	2265000	3	366.518	1097.54	0	-0.92	28.93	9085	9085	MS2	0/0	0	0	hela_waters_3.raw
High	A	2	SQDIYLR	6220	Unambiguous	60S ribosomal protein L18 OS=Homo sapiens OX=9606 GN=RPL18 PE=1 SV=2 - [RL18_HUMAN]	1	1	Q07020		HCD	1	0	1	1	0.008	0.0895	139	143	1.27	0	80	7	6812000	2	447.739	894.47	0	2.21	28.93	9087	9087	MS2	0/0	0	0	hela_waters_3.raw
High	A	2	LSVDYGK	4963	Unambiguous	Tubulin alpha-1A chain OS=Homo sapiens OX=9606 GN=TUBA1A PE=1 SV=1 - [TBA1A_HUMAN]|Tubulin alpha-1B chain OS=Homo sapiens OX=9606 GN=TUBA1B PE=1 SV=1 - [TBA1B_HUMAN]|Tubulin alpha-1C chain OS=Homo sapiens OX=9606 GN=TUBA1C PE=1 SV=1 - [TBA1C_HUMAN]|Tubulin alpha-4A chain OS=Homo sapiens OX=9606 GN=TUBA4A PE=1 SV=1 - [TBA4A_HUMAN]	5	2	Q9BQE3;P68366		HCD	1	0	1	1	0.005	0.0615	132	140	1.24	0	55	56	4094000	2	391.208	781.409	0	0.43	28.93	9088	9088	MS2	0/0	0	0	hela_waters_3.raw
High	A	2	TLSDYNIQK	6628	Unambiguous	Ubiquitin-40S ribosomal protein S27a OS=Homo sapiens OX=9606 GN=RPS27A PE=1 SV=2 - [RS27A_HUMAN]	4	1	P62979		HCD	1	0	1	1	0.004	0.0477	163	169	0.97	0	11	2	99690000	2	541.281	1081.55	0	1.33	28.94	9090	9090	MS2	0/0	0	0	hela_waters_3.raw
Middle	A	2	EAILAIHK	6634	Unambiguous	Alpha-actinin-4 OS=Homo sapiens OX=9606 GN=ACTN4 PE=1 SV=2 - [ACTN4_HUMAN]	1	1	O43707		HCD	1	0	1	1	0.01	0.151	36	51	1.12	0	65	6	8699000	2	447.775	894.542	0	1.55	28.95	9094	9094	MS2	0/0	0	0	hela_waters_3.raw
High	A	2	MINTDLSR	6638	Unambiguous	60S ribosomal protein L4 OS=Homo sapiens OX=9606 GN=RPL4 PE=1 SV=5 - [RL4_HUMAN]	1	1	P36578		HCD	1	0	1	1	0	7.18e-06	221	227	1.92	0	47	4	18140000	2	475.242	949.477	0	-0.61	28.95	9096	9096	MS2	0/0	0	0	hela_waters_3.raw
High	A	2	RPAEDMEEEQAFK	5753	Unambiguous	Heterogeneous nuclear ribonucleoprotein K OS=Homo sapiens OX=9606 GN=HNRNPK PE=1 SV=1 - [HNRPK_HUMAN]	1	1	P61978		HCD	1	0	1	1	0.001	0.0117	63	54	2.53	0	41	52	5843000	2	790.356	1579.7	0	-1.27	28.96	9098	9098	MS2	0/0	0	0	hela_waters_3.raw
Middle	A	2	AQMVQEDLEK	6646	Unambiguous	Moesin OS=Homo sapiens OX=9606 GN=MSN PE=1 SV=3 - [MOES_HUMAN]	1	1	P26038		HCD	1	0	1	1	0.021	0.278	147	141	1.23	0	71	8	11090000	2	595.791	1190.58	0	2.73	28.96	9100	9100	MS2	0/0	0	0	hela_waters_3.raw
High	A	2	GEFVTTVQQR	6648	Unambiguous	Malate dehydrogenase, cytoplasmic OS=Homo sapiens OX=9606 GN=MDH1 PE=1 SV=4 - [MDHC_HUMAN]	1	1	P40925		HCD	1	0	1	1	0	4.97e-08	192	200	1.86	0	64	10	10010000	2	582.807	1164.61	0	4.88	28.96	9101	9101	MS2	0/0	0	0	hela_waters_3.raw
High	A	2	TVFAEHISDEcK	6652	Unambiguous	60S ribosomal protein L3 OS=Homo sapiens OX=9606 GN=RPL3 PE=1 SV=2 - [RL3_HUMAN]	1	1	P39023	C11(Carbamidomethyl)	HCD	1	0	1	1	0	1.6e-13	105	99	1.84	0	67	53	4576000	2	718.33	1435.65	0	0.77	28.96	9103	9103	MS2	0/0	0	0	hela_waters_3.raw
High	A	2	QEYDESGPSIVHR	5305	Unambiguous	Actin, cytoplasmic 1 OS=Homo sapiens OX=9606 GN=ACTB PE=1 SV=1 - [ACTB_HUMAN]	7	1	P60709		HCD	1	0	1	1	0	4.21e-16	91	103	2.35	0	39	10	19170000	2	758.856	1516.7	0	1.51	28.97	9106	9106	MS2	0/0	0	0	hela_waters_3.raw
High	A	2	LASYLDR	6238	Unambiguous	Keratin, type I cytoskeletal 18 OS=Homo sapiens OX=9606 GN=KRT18 PE=1 SV=2 - [K1C18_HUMAN]	1	1	P05783		HCD	1	0	1	1	0.004	0.0527	159	170	1.46	0	40	12	11400000	2	419.227	837.447	0	1.02	28.98	9109	9109	MS2	0/0	0	0	hela_waters_3.raw
High	A	2	VVGcScVVVK	5487	Unambiguous	40S ribosomal protein S12 OS=Homo sapiens OX=9606 GN=RPS12 PE=1 SV=3 - [RS12_HUMAN]	1	1	P25398	C4(Carbamidomethyl); C6(Carbamidomethyl)	HCD	1	0	1	1	0.001	0.00573	202	202	1.51	0	67	24	5403000	2	553.789	1106.57	0	1.68	28.98	9110	9110	MS2	0/0	0	0	hela_waters_3.raw
High	A	2	ILGPGLNK	6667	Unambiguous	60S ribosomal protein L10a OS=Homo sapiens OX=9606 GN=RPL10A PE=1 SV=2 - [RL10A_HUMAN]	1	1	P62906		HCD	1	0	1	1	0	0.00383	43	38	2.16	0	39	10	15500000	2	406.256	811.504	0	0.44	28.98	9112	9112	MS2	0/0	0	0	hela_waters_3.raw
High	A	2	QVLVAPGNAGTAcSEK	6669	Unambiguous	Trifunctional purine biosynthetic protein adenosine-3 OS=Homo sapiens OX=9606 GN=GART PE=1 SV=1 - [PUR2_HUMAN]	1	1	P22102	C13(Carbamidomethyl)	HCD	1	0	1	1	0	2.7e-11	190	209	2.98	0	51	47	7175000	2	801.409	1601.81	0.01	9.57	28.98	9113	9113	MS2	0/0	0	0	hela_waters_3.raw
High	A	2	AVVIVDDR	6679	Unambiguous	Non-POU domain-containing octamer-binding protein OS=Homo sapiens OX=9606 GN=NONO PE=1 SV=4 - [NONO_HUMAN]|Splicing factor, proline- and glutamine-rich OS=Homo sapiens OX=9606 GN=SFPQ PE=1 SV=2 - [SFPQ_HUMAN]	2	2	Q15233;P23246		HCD	1	0	1	1	0.001	0.0124	158	165	1.82	0	52	17	5518000	2	443.754	886.5	0	0.76	28.99	9118	9118	MS2	0/0	0	0	hela_waters_3.raw
High	A	2	FEHcNFNDVTTR	6273	Unambiguous	CD59 glycoprotein OS=Homo sapiens OX=9606 GN=CD59 PE=1 SV=1 - [CD59_HUMAN]	1	1	P13987	C4(Carbamidomethyl)	HCD	1	0	1	1	0	7.08e-16	40	47	2.95	0	26	51	5462000	2	770.337	1539.67	0	1.77	28.99	9119	9119	MS2	0/0	0	0	hela_waters_3.raw
High	A	2	YLAEVATGDDK	6683	Unambiguous	14-3-3 protein sigma OS=Homo sapiens OX=9606 GN=SFN PE=1 SV=1 - [1433S_HUMAN]	1	1	P31947		HCD	1	0	1	1	0	3.41e-11	160	156	2.06	0	50	12	11950000	2	591.289	1181.57	0	1.05	29	9121	9121	MS2	0/0	0	0	hela_waters_3.raw
High	A	2	LVPQQLAH	6685	Unambiguous	Cytochrome c oxidase subunit 5B, mitochondrial OS=Homo sapiens OX=9606 GN=COX5B PE=1 SV=2 - [COX5B_HUMAN]	1	1	P10606		HCD	1	0	1	1	0.001	0.0062	152	175	1.72	0	62	8	7951000	2	453.263	905.519	0	-1.47	29	9122	9122	MS2	0/0	0	0	hela_waters_3.raw
High	A	2	SYcAEIAHNVSSK	5438	Unambiguous	60S ribosomal protein L32 OS=Homo sapiens OX=9606 GN=RPL32 PE=1 SV=2 - [RL32_HUMAN]	1	1	P62910	C3(Carbamidomethyl)	HCD	1	0	1	1	0	1.14e-05	130	136	1.69	0	43	56	3041000	2	733.345	1465.68	0	6.55	29	9123	9123	MS2	0/0	0	0	hela_waters_3.raw
High	A	2	DNSTMGYMAAK	6689	Unambiguous	Heat shock protein HSP 90-alpha OS=Homo sapiens OX=9606 GN=HSP90AA1 PE=1 SV=5 - [HS90A_HUMAN]	1	1	P07900		HCD	1	0	1	1	0	1.21e-07	19	23	2.03	0	41	16	13770000	2	594.755	1188.5	0	0.56	29	9124	9124	MS2	0/0	0	0	hela_waters_3.raw
High	A	2	IRYESLTDPSK	6433	Unambiguous	Heat shock protein HSP 90-beta OS=Homo sapiens OX=9606 GN=HSP90AB1 PE=1 SV=4 - [HS90B_HUMAN]|Heat shock protein HSP 90-alpha OS=Homo sapiens OX=9606 GN=HSP90AA1 PE=1 SV=5 - [HS90A_HUMAN]|Putative heat shock protein HSP 90-beta 4 OS=Homo sapiens OX=9606 GN=HSP90AB4P PE=5 SV=1 - [H90B4_HUMAN]	5	2	P08238;P07900		HCD	1	0	1	1	0.006	0.0704	191	195	2.31	1	8	8	43590000	2	654.844	1308.68	0	0.4	29.01	9126	9126	MS2	0/0	0	0	hela_waters_3.raw
High	A	2	VPPPPPIAR	6697	Unambiguous	Heterogeneous nuclear ribonucleoproteins C1/C2 OS=Homo sapiens OX=9606 GN=HNRNPC PE=1 SV=4 - [HNRPC_HUMAN]	1	1	P07910		HCD	1	0	1	1	0	0.00531	196	179	1.5	0	54	5	23710000	2	472.291	943.574	0	1.63	29.02	9130	9130	MS2	0/0	0	0	hela_waters_3.raw
High	A	2	AYTNFDAER	5820	Unambiguous	Annexin A2 OS=Homo sapiens OX=9606 GN=ANXA2 PE=1 SV=2 - [ANXA2_HUMAN]	2	1	P07355		HCD	1	0	1	1	0	0.000118	61	58	1.67	0	46	12	11730000	2	543.747	1086.49	0	0.61	29.02	9131	9131	MS2	0/0	0	0	hela_waters_3.raw
High	A	2	AQNTWGcGNSLR	6290	Unambiguous	Prelamin-A/C OS=Homo sapiens OX=9606 GN=LMNA PE=1 SV=1 - [LMNA_HUMAN]	1	1	P02545	C7(Carbamidomethyl)	HCD	1	0	1	1	0	4.39e-12	89	82	2.19	0	48	52	6604000	2	682.313	1363.62	0	0.82	29.02	9132	9132	MS2	0/0	0	0	hela_waters_3.raw
High	A	2	FANYIDK	6703	Unambiguous	Vimentin OS=Homo sapiens OX=9606 GN=VIM PE=1 SV=4 - [VIME_HUMAN]	1	1	P08670		HCD	1	0	1	1	0.001	0.0114	112	108	1.42	0	24	5	30360000	2	435.722	870.436	0	0.74	29.02	9133	9133	MS2	0/0	0	0	hela_waters_3.raw
High	A	2	VVPGYGHAVLR	6707	Unambiguous	Citrate synthase, mitochondrial OS=Homo sapiens OX=9606 GN=CS PE=1 SV=2 - [CISY_HUMAN]	1	1	O75390		HCD	1	0	1	1	0	1.46e-08	102	105	2.19	0	52	19	6218000	3	389.893	1167.66	0	1.19	29.03	9135	9135	MS2	0/0	0	0	hela_waters_3.raw
High	A	2	AHVVPcFDASK	6721	Unambiguous	Filamin-A OS=Homo sapiens OX=9606 GN=FLNA PE=1 SV=4 - [FLNA_HUMAN]	1	1	P21333	C6(Carbamidomethyl)	HCD	1	0	1	1	0	5.32e-06	115	121	1.4	0	58	7	11140000	2	615.8	1230.59	0	-0.06	29.03	9140	9140	MS2	0/0	0	0	hela_waters_3.raw
High	A	2	ATQQQHDFTLTQTADGR	6723	Unambiguous	DNA-dependent protein kinase catalytic subunit OS=Homo sapiens OX=9606 GN=PRKDC PE=1 SV=3 - [PRKDC_HUMAN]	1	1	P78527		HCD	1	0	1	1	0	1.48e-07	149	147	2.2	0	33	54	3369000	3	639.974	1917.91	0	0.98	29.04	9141	9141	MS2	0/0	0	0	hela_waters_3.raw
High	A	2	QADVNLVNAK	5860	Unambiguous	D-3-phosphoglycerate dehydrogenase OS=Homo sapiens OX=9606 GN=PHGDH PE=1 SV=4 - [SERA_HUMAN]	1	1	O43175		HCD	1	0	1	1	0	0.000397	186	185	2.37	0	62	20	5500000	2	536.294	1071.58	0	2.09	29.04	9143	9143	MS2	0/0	0	0	hela_waters_3.raw
High	A	2	QLSAQSYGVTSSTAR	6727	Unambiguous	Nuclear pore complex protein Nup153 OS=Homo sapiens OX=9606 GN=NUP153 PE=1 SV=2 - [NU153_HUMAN]	1	1	P49790		HCD	1	0	1	1	0	2.58e-06	168	176	1.84	0	7	56	4436000	2	778.392	1555.78	0	4.19	29.04	9145	9145	MS2	0/0	0	0	hela_waters_3.raw
High	A	2	EDQTEYLEER	6729	Unambiguous	Heat shock protein HSP 90-beta OS=Homo sapiens OX=9606 GN=HSP90AB1 PE=1 SV=4 - [HS90B_HUMAN]|Heat shock protein HSP 90-alpha OS=Homo sapiens OX=9606 GN=HSP90AA1 PE=1 SV=5 - [HS90A_HUMAN]|Putative heat shock protein HSP 90-beta 4 OS=Homo sapiens OX=9606 GN=HSP90AB4P PE=5 SV=1 - [H90B4_HUMAN]	4	2	P08238;P07900		HCD	1	0	1	1	0	2.15e-06	57	55	2.24	0	20	7	47440000	2	656.289	1311.57	0	0.4	29.05	9146	9146	MS2	0/0	0	0	hela_waters_3.raw
High	A	2	TVFAEHISDEcK	6652	Unambiguous	60S ribosomal protein L3 OS=Homo sapiens OX=9606 GN=RPL3 PE=1 SV=2 - [RL3_HUMAN]	1	1	P39023	C11(Carbamidomethyl)	HCD	1	0	1	1	0	1.06e-10	105	99	1.71	0	17	11	18970000	3	479.223	1435.65	0	0.8	29.05	9147	9147	MS2	0/0	0	0	hela_waters_3.raw
Middle	A	2	mLDESIR	6735	Unambiguous	Lysine-specific demethylase 6B OS=Homo sapiens OX=9606 GN=KDM6B PE=1 SV=4 - [KDM6B_HUMAN]	1	1	O15054	M1(Oxidation)	HCD	1	0	1	1	0.039	0.528	148	147	1.25	0	65	38	3024000	2	440.214	879.421	0	-3.72	29.06	9150	9150	MS2	0/0	0	0	hela_waters_3.raw
High	A	2	HVLVTLGEK	6747	Unambiguous	Myosin light polypeptide 6 OS=Homo sapiens OX=9606 GN=MYL6 PE=1 SV=2 - [MYL6_HUMAN]	1	1	P60660		HCD	1	0	1	1	0	0.00014	74	77	1.85	0	65	4	18680000	2	498.299	995.59	0	1.45	29.07	9158	9158	MS2	0/0	0	0	hela_waters_3.raw
High	A	2	GGGQIIPTAR	6315	Unambiguous	Elongation factor 2 OS=Homo sapiens OX=9606 GN=EEF2 PE=1 SV=4 - [EF2_HUMAN]|116 kDa U5 small nuclear ribonucleoprotein component OS=Homo sapiens OX=9606 GN=EFTUD2 PE=1 SV=1 - [U5S1_HUMAN]	2	2	P13639;Q15029		HCD	1	0	1	1	0.001	0.0121	126	114	1.86	0	65	7	8822000	2	485.28	969.553	0	5.97	29.08	9159	9159	MS2	0/0	0	0	hela_waters_3.raw
High	A	2	KQPPVSPGTALVGSQK	6346	Unambiguous	High mobility group protein HMG-I/HMG-Y OS=Homo sapiens OX=9606 GN=HMGA1 PE=1 SV=3 - [HMGA1_HUMAN]	1	1	P17096		HCD	1	0	1	1	0	3.77e-13	108	112	2.89	1	10	53	4734000	2	797.452	1593.9	0	0.97	29.09	9165	9165	MS2	0/0	0	0	hela_waters_3.raw
High	A	2	FcEcDNFNcDR	6759	Unambiguous	Integrin beta-1 OS=Homo sapiens OX=9606 GN=ITGB1 PE=1 SV=2 - [ITB1_HUMAN]	1	1	P05556	C2(Carbamidomethyl); C4(Carbamidomethyl); C9(Carbamidomethyl)	HCD	1	0	1	1	0	2.57e-06	1	1	1.87	0	57	54	4611000	2	768.769	1536.53	0	0.05	29.09	9166	9166	MS2	0/0	0	0	hela_waters_3.raw
High	A	2	ATQQQHDFTLTQTADGR	6723	Unambiguous	DNA-dependent protein kinase catalytic subunit OS=Homo sapiens OX=9606 GN=PRKDC PE=1 SV=3 - [PRKDC_HUMAN]	1	1	P78527		HCD	1	0	1	1	0	4.21e-16	147	139	2.65	0	43	60	2338000	2	959.454	1917.9	0	-1.75	29.09	9167	9167	MS2	0/0	0	0	hela_waters_3.raw
High	A	2	LYGSAGPPPTGEEDTAEK	5944	Unambiguous	Endoplasmic reticulum chaperone BiP OS=Homo sapiens OX=9606 GN=HSPA5 PE=1 SV=2 - [BIP_HUMAN]	1	1	P11021		HCD	1	0	1	1	0	2.94e-11	115	116	2.07	0	60	59	3719000	2	909.923	1818.84	0	-0.01	29.1	9169	9169	MS2	0/0	0	0	hela_waters_3.raw
High	A	2	TPVEPEVAIHR	6768	Unambiguous	40S ribosomal protein S20 OS=Homo sapiens OX=9606 GN=RPS20 PE=1 SV=1 - [RS20_HUMAN]	1	1	P60866		HCD	1	0	1	1	0	1.83e-06	225	226	2.43	0	30	9	15260000	3	416.564	1247.68	0	1.39	29.11	9172	9172	MS2	0/0	0	0	hela_waters_3.raw
High	A	2	TPAQYDASELK	5751	Unambiguous	Annexin A2 OS=Homo sapiens OX=9606 GN=ANXA2 PE=1 SV=2 - [ANXA2_HUMAN]	2	1	P07355		HCD	1	0	1	1	0	1.16e-15	178	171	2.6	0	25	11	19220000	2	611.802	1222.6	0	1.57	29.12	9177	9177	MS2	0/0	0	0	hela_waters_3.raw
High	A	2	EEEMMIR	6780	Unambiguous	Splicing factor, proline- and glutamine-rich OS=Homo sapiens OX=9606 GN=SFPQ PE=1 SV=2 - [SFPQ_HUMAN]	1	1	P23246		HCD	1	0	1	1	0.004	0.0469	48	60	1.51	0	72	23	5236000	2	469.21	937.414	0	1.91	29.13	9180	9180	MS2	0/0	0	0	hela_waters_3.raw
High	A	2	VVTDTDETELAR	6365	Unambiguous	Eukaryotic translation initiation factor 2 subunit 1 OS=Homo sapiens OX=9606 GN=EIF2S1 PE=1 SV=3 - [IF2A_HUMAN]	1	1	P05198		HCD	1	0	1	1	0	4.21e-16	164	194	2.48	0	32	51	7036000	2	674.834	1348.66	0	0.7	29.14	9186	9186	MS2	0/0	0	0	hela_waters_3.raw
High	A	2	NAMGSLASQATK	6793	Unambiguous	26S proteasome non-ATPase regulatory subunit 4 OS=Homo sapiens OX=9606 GN=PSMD4 PE=1 SV=1 - [PSMD4_HUMAN]	1	1	P55036		HCD	1	0	1	1	0	8.26e-13	163	182	1.84	0	71	16	9618000	2	589.796	1178.59	0	1.62	29.14	9187	9187	MS2	0/0	0	0	hela_waters_3.raw
Middle	A	2	GRNDLMEYAK	6377	Unambiguous	Argininosuccinate synthase OS=Homo sapiens OX=9606 GN=ASS1 PE=1 SV=2 - [ASSY_HUMAN]	1	1	P00966		HCD	1	0	1	1	0.018	0.243	159	175	2.39	1	32	22	13610000	2	598.79	1196.57	0	-0.18	29.15	9190	9190	MS2	0/0	0	0	hela_waters_3.raw
Middle	A	2	KLPFQR	6383	Unambiguous	Histone H3.1 OS=Homo sapiens OX=9606 GN=HIST1H3A PE=1 SV=2 - [H31_HUMAN]	7	1	P68431		HCD	1	0	1	1	0.04	0.549	175	180	1.58	1	58	9	9128000	2	394.743	788.479	0	1.08	29.15	9191	9191	MS2	0/0	0	0	hela_waters_3.raw
High	A	2	LEQEIATYR	6803	Unambiguous	Keratin, type I cytoskeletal 17 OS=Homo sapiens OX=9606 GN=KRT17 PE=1 SV=2 - [K1C17_HUMAN]|Keratin, type I cytoskeletal 19 OS=Homo sapiens OX=9606 GN=KRT19 PE=1 SV=4 - [K1C19_HUMAN]	8	2	Q04695;P08727		HCD	1	0	1	1	0	3.24e-09	216	240	2.22	0	34	6	19090000	2	561.794	1122.58	0	1.11	29.15	9193	9193	MS2	0/0	0	0	hela_waters_3.raw
High	A	2	YFEGVSPK	6805	Unambiguous	DNA-dependent protein kinase catalytic subunit OS=Homo sapiens OX=9606 GN=PRKDC PE=1 SV=3 - [PRKDC_HUMAN]	1	1	P78527		HCD	1	0	1	1	0.007	0.0766	112	98	1.2	0	62	7	9660000	2	463.735	926.463	0	1.38	29.15	9194	9194	MS2	0/0	0	0	hela_waters_3.raw
High	A	2	TEEGPTLSYGR	6807	Unambiguous	Matrin-3 OS=Homo sapiens OX=9606 GN=MATR3 PE=1 SV=2 - [MATR3_HUMAN]	1	1	P43243		HCD	1	0	1	1	0	0.00323	127	117	1.52	0	81	60	3820000	2	605.29	1209.57	0	-0.92	29.16	9196	9196	MS2	0/0	0	0	hela_waters_3.raw
High	A	2	IPMEMTR	6809	Unambiguous	39S ribosomal protein L23, mitochondrial OS=Homo sapiens OX=9606 GN=MRPL23 PE=1 SV=1 - [RM23_HUMAN]	1	1	Q16540		HCD	1	0	1	1	0.009	0.11	176	161	1.2	0	64	32	2584000	2	439.217	877.428	0	0.52	29.16	9197	9197	MS2	0/0	0	0	hela_waters_3.raw
High	A	2	LLLQVQHASK	6813	Unambiguous	ADP/ATP translocase 1 OS=Homo sapiens OX=9606 GN=SLC25A4 PE=1 SV=4 - [ADT1_HUMAN]|ADP/ATP translocase 2 OS=Homo sapiens OX=9606 GN=SLC25A5 PE=1 SV=7 - [ADT2_HUMAN]|ADP/ATP translocase 3 OS=Homo sapiens OX=9606 GN=SLC25A6 PE=1 SV=4 - [ADT3_HUMAN]	3	3	P12235;P05141;P12236		HCD	1	0	1	1	0	1.66e-07	50	50	1.73	0	33	2	67470000	2	568.843	1136.68	0	0.84	29.16	9199	9199	MS2	0/0	0	0	hela_waters_3.raw
High	A	2	LVIDEPAK	6817	Unambiguous	Hepatoma-derived growth factor OS=Homo sapiens OX=9606 GN=HDGF PE=1 SV=1 - [HDGF_HUMAN]	1	1	P51858		HCD	1	0	1	1	0	0.000837	66	70	1.39	0	46	13	6447000	2	442.758	884.509	0	0.44	29.17	9202	9202	MS2	0/0	0	0	hela_waters_3.raw
Middle	A	2	DADPILR	6819	Unambiguous	Carbamoyl-phosphate synthase [ammonia], mitochondrial OS=Homo sapiens OX=9606 GN=CPS1 PE=1 SV=2 - [CPSM_HUMAN]	1	1	P31327		HCD	1	0	1	1	0.028	0.372	76	77	1.48	0	60	28	5232000	2	400.22	799.433	0	2.22	29.17	9203	9203	MS2	0/0	0	0	hela_waters_3.raw
High	A	2	MEEESGAPGVPSGNGAPGPK	6391	Unambiguous	Heterogeneous nuclear ribonucleoprotein M OS=Homo sapiens OX=9606 GN=HNRNPM PE=1 SV=3 - [HNRPM_HUMAN]	1	1	P52272		HCD	1	0	1	1	0.001	0.013	95	98	1.19	0	70	60	1321000	2	934.428	1867.85	0	0.05	29.17	9204	9204	MS2	0/0	0	0	hela_waters_3.raw
Middle	A	2	EETQPPVALK	6825	Unambiguous	Plasminogen activator inhibitor 1 RNA-binding protein OS=Homo sapiens OX=9606 GN=SERBP1 PE=1 SV=2 - [PAIRB_HUMAN]	1	1	Q8NC51		HCD	1	0	1	1	0.028	0.373	142	143	1.2	0	44	20	9211000	2	556.304	1111.6	0	1.64	29.18	9206	9206	MS2	0/0	0	0	hela_waters_3.raw
High	A	2	LQDEIQNMK	6411	Unambiguous	Vimentin OS=Homo sapiens OX=9606 GN=VIM PE=1 SV=4 - [VIME_HUMAN]	1	1	P08670		HCD	1	0	1	1	0.002	0.0141	186	192	1.75	0	44	3	29790000	2	559.779	1118.55	0	-0.02	29.18	9209	9209	MS2	0/0	0	0	hela_waters_3.raw
High	A	2	YKPVcNQVEcHPYFNR	6835	Unambiguous	Aldo-keto reductase family 1 member C3 OS=Homo sapiens OX=9606 GN=AKR1C3 PE=1 SV=4 - [AK1C3_HUMAN]	1	1	P42330	C5(Carbamidomethyl); C10(Carbamidomethyl)	HCD	1	0	1	1	0	4.21e-16	109	115	2.9	0	26	41	10770000	3	704.326	2110.96	0	2.01	29.19	9212	9212	MS2	0/0	0	0	hela_waters_3.raw
High	A	2	SSSSGHYVSWVK	6837	Unambiguous	Ubiquitin carboxyl-terminal hydrolase 14 OS=Homo sapiens OX=9606 GN=USP14 PE=1 SV=3 - [UBP14_HUMAN]	1	1	P54578		HCD	1	0	1	1	0.007	0.076	158	158	1.67	0	56	56	3922000	2	662.32	1323.63	0	0.21	29.19	9213	9213	MS2	0/0	0	0	hela_waters_3.raw
High	A	2	AAYEAELGDAR	6848	Unambiguous	Prelamin-A/C OS=Homo sapiens OX=9606 GN=LMNA PE=1 SV=1 - [LMNA_HUMAN]	1	1	P02545		HCD	1	0	1	1	0	5.71e-07	126	138	1.88	0	44	5	28400000	2	583.279	1165.55	0	1.52	29.2	9218	9218	MS2	0/0	0	0	hela_waters_3.raw
High	A	2	AGFAGDDAPR	3936	Unambiguous	Actin, alpha cardiac muscle 1 OS=Homo sapiens OX=9606 GN=ACTC1 PE=1 SV=1 - [ACTC_HUMAN]|Actin, cytoplasmic 1 OS=Homo sapiens OX=9606 GN=ACTB PE=1 SV=1 - [ACTB_HUMAN]	10	2	P68032;P60709		HCD	1	0	1	1	0.001	0.0125	83	88	1.48	0	74	6	7300000	2	488.728	976.449	0	1	29.2	9219	9219	MS2	0/0	0	0	hela_waters_3.raw
High	A	2	HQGVMVGMGQK	2468	Unambiguous	Actin, alpha cardiac muscle 1 OS=Homo sapiens OX=9606 GN=ACTC1 PE=1 SV=1 - [ACTC_HUMAN]|Beta-actin-like protein 2 OS=Homo sapiens OX=9606 GN=ACTBL2 PE=1 SV=2 - [ACTBL_HUMAN]|Actin, cytoplasmic 1 OS=Homo sapiens OX=9606 GN=ACTB PE=1 SV=1 - [ACTB_HUMAN]	7	3	P68032;Q562R1;P60709		HCD	1	0	1	1	0	0.000493	128	126	2.16	0	33	60	4894000	2	586.289	1171.57	0	-0.55	29.2	9220	9220	MS2	0/0	0	0	hela_waters_3.raw
High	A	2	IGAEVYHNLK	5629	Unambiguous	Alpha-enolase OS=Homo sapiens OX=9606 GN=ENO1 PE=1 SV=2 - [ENOA_HUMAN]	1	1	P06733		HCD	1	0	1	1	0	8.97e-05	219	226	1.58	0	38	9	17550000	2	572.312	1143.62	0	0.36	29.21	9223	9223	MS2	0/0	0	0	hela_waters_3.raw
High	A	2	GAEAANVTGPGGVPVQGSK	6862	Unambiguous	Nuclease-sensitive element-binding protein 1 OS=Homo sapiens OX=9606 GN=YBX1 PE=1 SV=3 - [YBOX1_HUMAN]	1	1	P67809		HCD	1	0	1	1	0	4.21e-16	207	202	3.31	0	9	37	16630000	2	848.437	1695.87	0	0.07	29.21	9226	9226	MS2	0/0	0	0	hela_waters_3.raw
High	A	2	SEPIPESNDGPVK	6044	Unambiguous	Protein disulfide-isomerase A3 OS=Homo sapiens OX=9606 GN=PDIA3 PE=1 SV=4 - [PDIA3_HUMAN]	1	1	P30101		HCD	1	0	1	1	0	9.7e-08	132	126	1.93	0	58	49	6452000	2	684.836	1368.66	0	0.45	29.22	9228	9228	MS2	0/0	0	0	hela_waters_3.raw
High	A	2	LAADDFR	6445	Unambiguous	Keratin, type I cytoskeletal 17 OS=Homo sapiens OX=9606 GN=KRT17 PE=1 SV=2 - [K1C17_HUMAN]|Keratin, type I cytoskeletal 18 OS=Homo sapiens OX=9606 GN=KRT18 PE=1 SV=2 - [K1C18_HUMAN]|Keratin, type I cytoskeletal 19 OS=Homo sapiens OX=9606 GN=KRT19 PE=1 SV=4 - [K1C19_HUMAN]|Keratin, type I cytoskeletal 10 OS=Homo sapiens OX=9606 GN=KRT10 PE=1 SV=6 - [K1C10_HUMAN]	17	4	Q04695;P05783;P08727;P13645		HCD	1	0	1	1	0.001	0.013	182	182	1.72	0	38	6	18170000	2	404.203	807.399	0	-0.24	29.23	9233	9233	MS2	0/0	0	0	hela_waters_3.raw
High	A	2	FALETR	6876	Unambiguous	Persulfide dioxygenase ETHE1, mitochondrial OS=Homo sapiens OX=9606 GN=ETHE1 PE=1 SV=2 - [ETHE1_HUMAN]	1	1	O95571		HCD	1	0	1	1	0.009	0.125	114	118	1.32	0	70	60	834900	2	368.703	736.399	0	-0.08	29.24	9235	9235	MS2	0/0	0	0	hela_waters_3.raw
High	A	2	TIVEEVQDGK	6882	Unambiguous	Keratin, type I cytoskeletal 17 OS=Homo sapiens OX=9606 GN=KRT17 PE=1 SV=2 - [K1C17_HUMAN]	1	1	Q04695		HCD	1	0	1	1	0	3.27e-11	258	261	2.06	0	37	3	47580000	2	559.291	1117.58	0	1.25	29.25	9239	9239	MS2	0/0	0	0	hela_waters_3.raw
High	A	2	TAVcDIPPR	6459	Unambiguous	Tubulin beta-2A chain OS=Homo sapiens OX=9606 GN=TUBB2A PE=1 SV=1 - [TBB2A_HUMAN]|Tubulin beta-4A chain OS=Homo sapiens OX=9606 GN=TUBB4A PE=1 SV=2 - [TBB4A_HUMAN]|Tubulin beta-4B chain OS=Homo sapiens OX=9606 GN=TUBB4B PE=1 SV=1 - [TBB4B_HUMAN]|Tubulin beta chain OS=Homo sapiens OX=9606 GN=TUBB PE=1 SV=2 - [TBB5_HUMAN]	7	2	P68371;P07437	C4(Carbamidomethyl)	HCD	1	0	1	1	0	1.05e-07	125	121	1.89	0	31	5	28600000	2	514.763	1028.52	0	0.18	29.25	9241	9241	MS2	0/0	0	0	hela_waters_3.raw
High	A	2	LESGMQNMSIHTK	6463	Unambiguous	Keratin, type II cytoskeletal 8 OS=Homo sapiens OX=9606 GN=KRT8 PE=1 SV=7 - [K2C8_HUMAN]	1	1	P05787		HCD	1	0	1	1	0	1.43e-07	105	113	1.89	0	16	33	15610000	2	738.353	1475.7	0	-0.01	29.25	9242	9242	MS2	0/0	0	0	hela_waters_3.raw
High	A	2	HWGGNVLGPK	6461	Unambiguous	60S ribosomal protein L7a OS=Homo sapiens OX=9606 GN=RPL7A PE=1 SV=2 - [RL7A_HUMAN]	1	1	P62424		HCD	1	0	1	1	0.004	0.053	180	177	1.04	0	49	5	16190000	2	532.784	1064.56	0	-1.83	29.26	9243	9243	MS2	0/0	0	0	hela_waters_3.raw
High	A	2	IGAEVYHNLK	5629	Unambiguous	Alpha-enolase OS=Homo sapiens OX=9606 GN=ENO1 PE=1 SV=2 - [ENOA_HUMAN]	1	1	P06733		HCD	1	0	1	1	0	0.000105	213	218	2.24	0	22	34	7018000	3	381.877	1143.62	0	0.75	29.26	9245	9245	MS2	0/0	0	0	hela_waters_3.raw
High	A	2	VDNDENEHQLSLR	4995	Unambiguous	Nucleophosmin OS=Homo sapiens OX=9606 GN=NPM1 PE=1 SV=2 - [NPM_HUMAN]	1	1	P06748		HCD	1	0	1	1	0	1.43e-06	123	108	2.13	0	50	56	3351000	2	784.865	1568.72	0	-5.12	29.28	9252	9252	MS2	0/0	0	0	hela_waters_3.raw
High	A	2	YLMEEDEDAYKK	6904	Unambiguous	60S ribosomal protein L5 OS=Homo sapiens OX=9606 GN=RPL5 PE=1 SV=3 - [RL5_HUMAN]	1	1	P46777		HCD	1	0	1	1	0	2.83e-05	49	45	1.56	1	20	46	8657000	2	767.341	1533.68	0	-1.69	29.28	9254	9254	MS2	0/0	0	0	hela_waters_3.raw
Middle	A	2	LNLVQR	5696	Selected	L-lactate dehydrogenase B chain OS=Homo sapiens OX=9606 GN=LDHB PE=1 SV=2 - [LDHB_HUMAN]|L-lactate dehydrogenase A chain OS=Homo sapiens OX=9606 GN=LDHA PE=1 SV=2 - [LDHA_HUMAN]	3	2	P07195;P00338		HCD	0.0393	0	1	1	0.02	0.274	86	85	1.78	0	33	47	6595000	2	371.733	742.458	0	0.97	29.28	9255	9255	MS2	0/0	0	0	hela_waters_3.raw
Middle	A	2	QVLGGLR	5697	Rejected	Fibroblast growth factor-binding protein 3 OS=Homo sapiens OX=9606 GN=FGFBP3 PE=1 SV=1 - [FGFP3_HUMAN]	1	0			HCD		0.0393	2	2	0.026	0.352	86	85	1.71	0	33	47	6595000	2	371.733	742.458	0	0.95	29.28	9255	9255	MS2	0/0	0	0	hela_waters_3.raw
High	A	2	EQIVPKPEEEVAQK	6385	Unambiguous	60S ribosomal protein L17 OS=Homo sapiens OX=9606 GN=RPL17 PE=1 SV=3 - [RL17_HUMAN]	1	1	P18621		HCD	1	0	1	1	0.001	0.0119	154	165	1.97	0	33	49	6114000	2	812.436	1623.87	0	4.07	29.28	9256	9256	MS2	0/0	0	0	hela_waters_3.raw
High	A	2	AEEDEILNR	6910	Unambiguous	Calnexin OS=Homo sapiens OX=9606 GN=CANX PE=1 SV=2 - [CALX_HUMAN]	1	1	P27824		HCD	1	0	1	1	0	1.64e-05	114	122	1.51	0	45	6	10030000	2	544.765	1088.52	0	0.33	29.29	9257	9257	MS2	0/0	0	0	hela_waters_3.raw
[truncated: 17,783 more rows]
